# Supplementary material for: A flexible repertoire of transcription factor binding sites and a diversity threshold determines enhancer activity in embryonic stem cells
Source: PubMed Central journal article supplement — Genome Res. 2021 Apr;31(4):564–75. doi: 10.1101/gr.272468.120 (PMC8015845; doi:10.1101/gr.272468.120), 2021-04
Supplement: supp_gr.272468.120_Supplemental_DATA.pdf [file supp_gr.272468.120_Supplemental_DATA.pdf]

**Supplemental data for:**

**A flexible repertoire of transcription factor binding sites and diversity threshold determines enhancer activity in embryonic stem cells**

Gurdeep Singh<sup>1</sup>, Shanelle Mullany<sup>1</sup>, Sakthi D Moorthy<sup>1</sup>, Richard Zhang<sup>1</sup>, Tahmid Mehdi<sup>2</sup>, Ruxiao Tian<sup>1</sup>, Andrew G Duncan<sup>1</sup>, Alan M Moses<sup>1,2,3</sup>, Jennifer A Mitchell<sup>1\*</sup>

1) Department of Cell and Systems Biology, University of Toronto, Toronto, ON, M5S 3G5, Canada.

2) Department of Computer Science, University of Toronto, Toronto, M5S 2E4, Canada.

3) Department of Ecology & Evolutionary Biology, University of Toronto, Toronto, M5S 3B3, Canada.

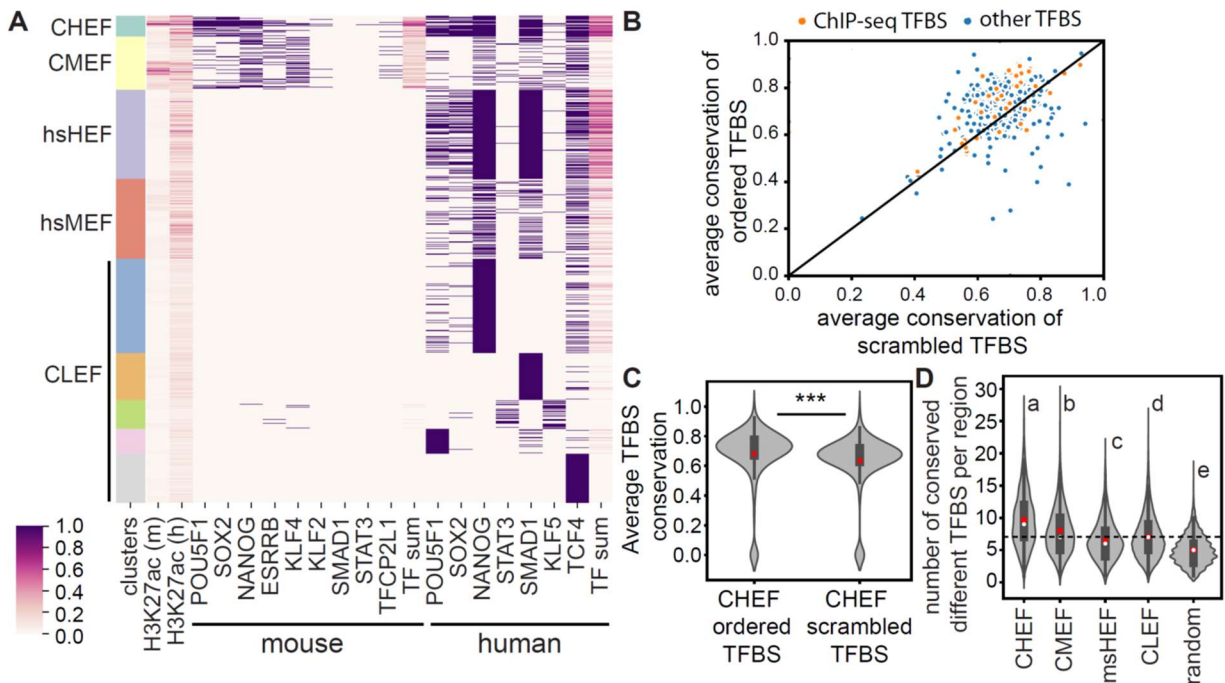

**Supplemental Figure S1: Mouse-human conserved high enhancer feature regions (CHEF) contain conserved TFBS.** A) Clustering of TF bound regions in human ESCs, using H3K27ac histone modification in human, TF binding and H3K27ac histone modification at associated mouse regions. Clusters are labeled as CHEF, conserved medium enhancer feature (CMEF), human specific high enhancer feature (hsHEF), human specific medium enhancer feature (hsMEF), and conserved low enhancer feature (CLEF) regions. B) Average TFBS conservation for ordered TFBS compared to scrambled TFBS in mouse CHEF regions. Each dot represents a different specific TFBS. The majority of the ordered TFBS motifs are above the diagonal line indicating they are more conserved between mouse-human species than the scrambled TFBS motifs. C) Average mouse-human TFBS sequence conservation in mouse CHEF regions is significantly higher for ordered TFBS motifs compared to scrambled TFBS motifs. D) CHEF cluster regions in mouse contain an increased number of conserved TFBS across six species compared to other clusters and random non-TF bound regions after removal of all TFBS bound by ChIP-seq TFs. Groups determined by one-way ANOVA to be significantly different ( $P < 0.05$ ) are labelled with different letters.

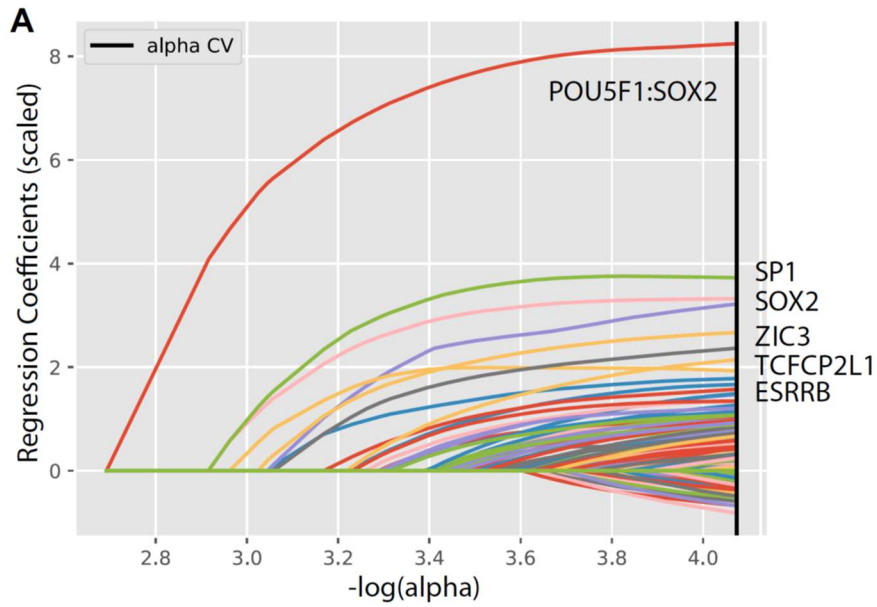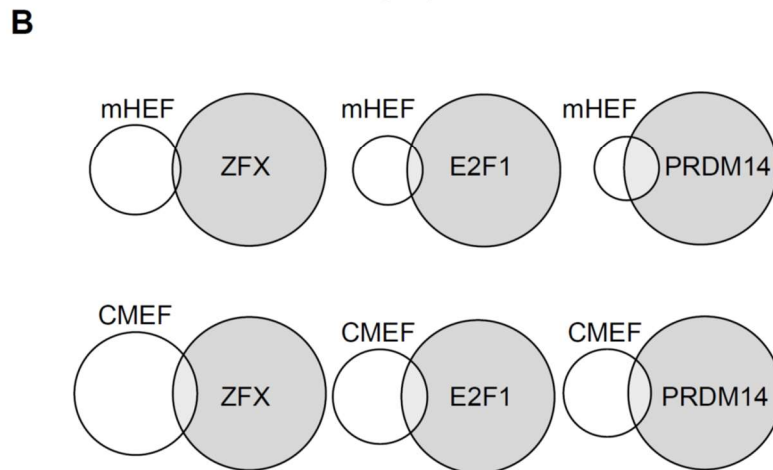

**Supplemental Figure S2: TFBS enrichment in CHEF regions and those mutated by site directed mutagenesis (SDM).** A) Regression coefficient progression for LASSO paths. B) Overlap of mouse CMEF and msHEF regions with the EP300 bound regions and ChIP-seq for PRDM14, E2F1, or ZFX.

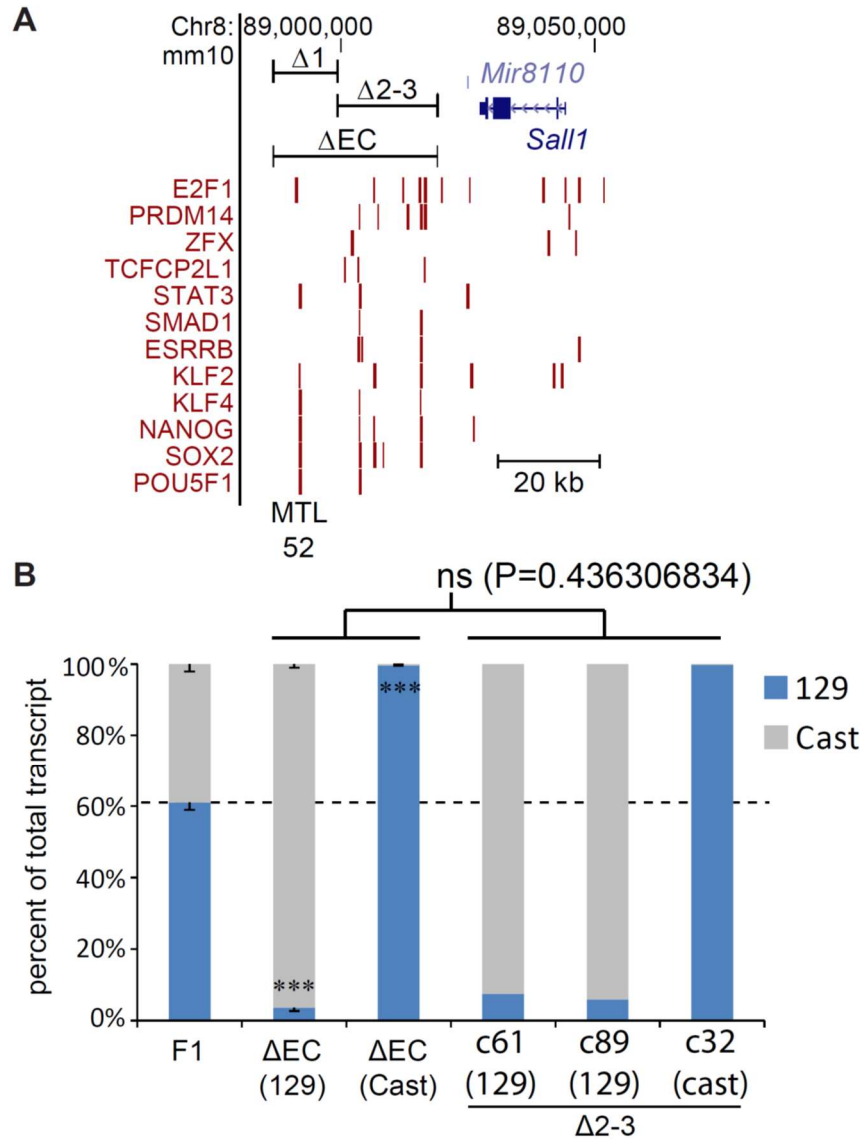

**Supplemental Figure S3: The multiple transcription factor bound region 52 kb downstream of *Sall1* (MTL52) does not drive transcription of *Sall1* in ESCs.** A) Schematic representation of the *Sall1* locus in the mouse genome. Transcription factor bound regions from ChIP-seq (red bars) are displayed on the mm10 assembly of the University of California at Santa Cruz (UCSC) Genome Browser. CRISPR deleted regions ( $\Delta EC$ ,  $\Delta 1$ ,  $\Delta 2-3$ ) are displayed. The location of MTL52 in the  $\Delta 1$  region is indicated. B) *Sall1* expression in wild type F1 clones (F1) compared to clones with the indicated deletion. Allele-specific primers detect 129 or Cast RNA in RT-qPCR. Expression for each allele is shown relative to the total. Error bars represent SEM. Significant differences from the F1 values are indicated by \*\*\*  $P < 0.001$  for the EC deletion replicates. Deletion of the entire EC dramatically reduces expression of the linked *Sall1* allele. Deletion of the  $\Delta 2-3$  region similarly reduces expression of the linked *Sall1* allele in 3 separate clones (c61, c89, c32). Comparison of the percent reduced transcription for  $\Delta EC$  (n=8) compared to  $\Delta 2-3$  (n=3) revealed no significant difference (ns), indicating MTL52 does not significantly contribute to *Sall1* transcription in ESs.

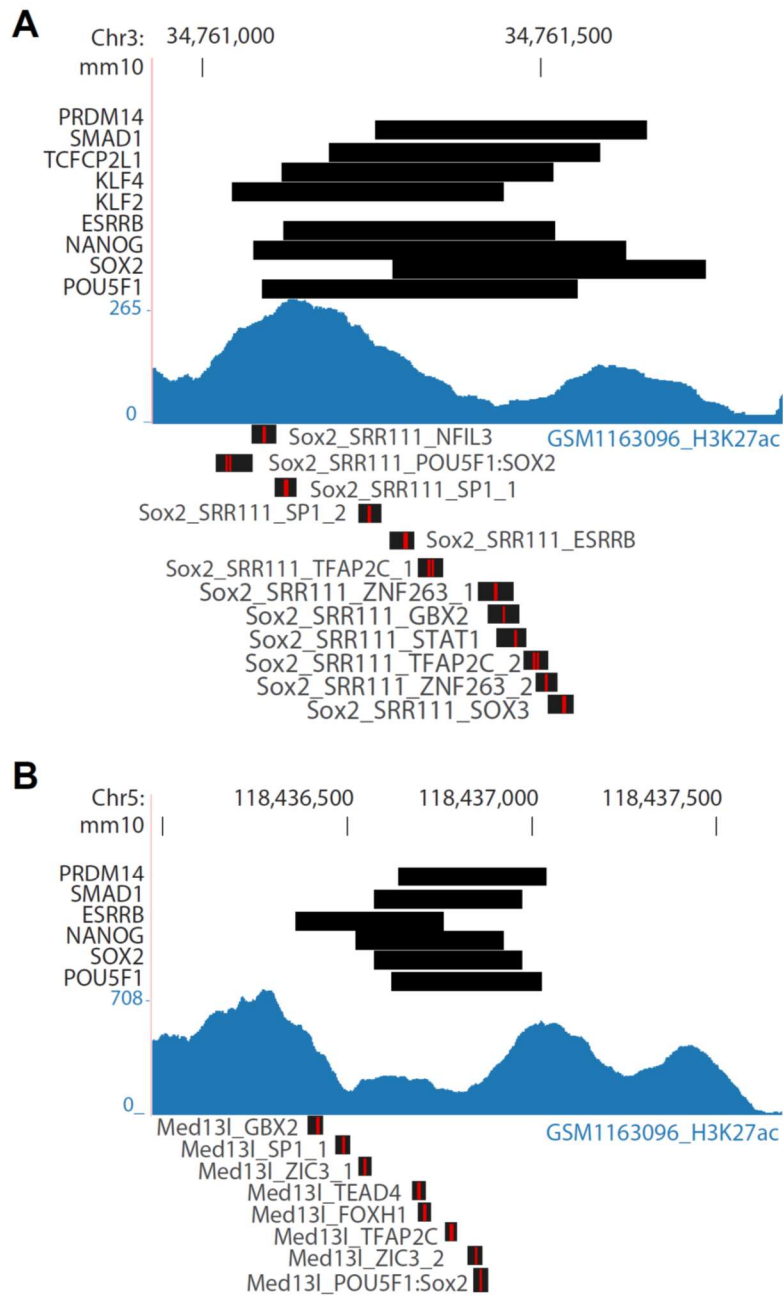

**Supplemental Figure S4: Mutations in the Sox2 or Med13l enhancers.** Schematic representation of the *Sox2* (A) or *Med13l* (B) enhancer in the mouse genome. Transcription factor bound regions from ChIP-seq (black bars at top) are displayed on the mm10 assembly of the University of California at Santa Cruz (UCSC) Genome Browser. Mutations introduced by SDM are indicated by red lines in black bars below. H3K27ac ChIP-seq data from ESCs is displayed in blue.

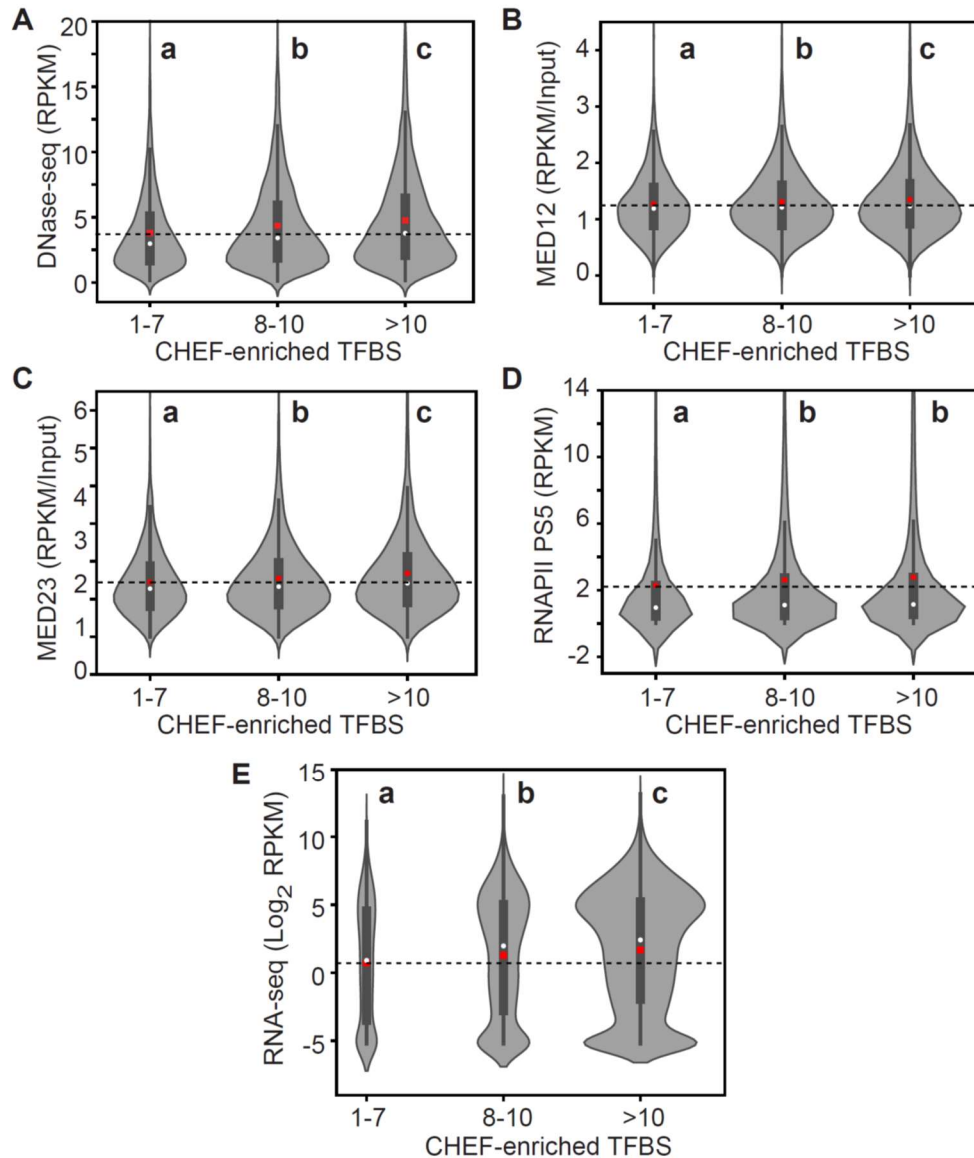

**Supplemental Figure S5: TF bound regions containing an increased number of CHEF-enriched TFBS are enriched in enhancer-associated chromatin features and associated with increased gene expression.** In all panels, groups determined by one-way ANOVA to be significantly different ( $P < 0.01$ ) are labelled with different letters. Dashed line indicates the average for the 1-7 TFBS group. Transcription factor bound regions in mouse ESC with >10 TFBS have significantly increased (A) DNase I sensitivity (DNase-seq), (B/C) MED12 and MED23 compared to transcription factor bound regions with 8-10 and 1-7 TFBS in the 700bp sequence window. D) RNA polymerase II phosphor S5 (RNAPII PS5) is significantly enriched at regions containing 8-10, or >10 CHEF-enriched TFBS compared to regions with 1-7. E) Genes were separated into 3 groups; those with a >10 TFBS region within 200kb, an 8-10 TFBS or 1-7 TFBS region within 200kb.

**Supplemental Table S1: Clustering of transcription factor bound regions in mouse and human ESCs.** Data provided in a separate file.

**Supplemental Table S2: LASSO coefficients for TFBS enriched or depleted in CHEF compared to the NANOG bound cluster.**  
Data provided in a separate file.

**Supplemental Table S3: Orientation preferences in CHEF sequences.**  
Data provided in a separate file.





|                                                                                                                                                                                                                                                                                                                                      |                                                                                                             |            |
|--------------------------------------------------------------------------------------------------------------------------------------------------------------------------------------------------------------------------------------------------------------------------------------------------------------------------------------|-------------------------------------------------------------------------------------------------------------|------------|
| <b>14dTFBS_c</b>                                                                                                                                                                                                                                                                                                                     | TFCP2, TFAP2C, SMAD3, ESRRB, LIN54, ZIC3, ZFX, ZBTB7A, FOXH1, PRDM1, MLXIP, TCF7L2, FOXP1, ZFP263           |            |
| <u>GGTCTGACAGCGGCCGCACTTGTGCCTGAACACCATATCCCAAACCGGTTTCctgcctagggcaCCcgtctagacaCCagctcaaggtcaCCatttgaattCCggcccccgctgtgcCCcccggcgccgctgCCggcgaccaca</u><br><u>gaCCtccaatccacaCCagaaagtgaagttCCgcacgtgtCCgaagttcaaaggaaCCataaagtaaacacaacC</u><br><u>CggaggaggaggaggaggaggaCCGTTTTCTTGGCAATCGACTCTCGCGGCCGCAAATGCTAA</u>              |                                                                                                             | GC: 58.33% |
| <b>14dTFBS_d</b>                                                                                                                                                                                                                                                                                                                     | HIC2, FOXD1, Myc, MAFK, Hic1, TFEB, TP53, ZNF410, HINFP, HLF, TFAP2C(var.2), Bhlhe40, JUNB, Stat4           |            |
| <u>GGTCTGACAGCGGCCGCACTTGTGCCTGAACACCATATCCCatgccaccCCgtaaacatCCcctgtgtc</u><br><u>ttCCAagactcagcaatttCCatgccaaccCCatcacgtgacCCctggacatgcctgtgcctgtCCtgcacccataataa</u><br><u>ctCCctacgtccgcCCggttacataattCCagcctcaggcaCCctcacgtgacCCggatgactcatCcttccaggaaat</u><br><u>aaCCGTTTTCTTGGCAATCGACTCTCGCGGCCGCAAATGCTAA</u>              |                                                                                                             | GC: 55.27% |
| <b>14dTFBS_e</b>                                                                                                                                                                                                                                                                                                                     | JUNB, FOSL1, Hic1, Stat4, Ddit3::Cebpa, TFAP2C(var.2), HLF, TFEB, TP53, GLI2, Bhlhe40, PBX1, Klf12, MAX     |            |
| <u>GGTCTGACAGCGGCCGCACTTGTGCCTGAACACCATATCCGgatgactcatCCggtgactcatgCCatg</u><br><u>ccaaccCcttccaggaaataaCCggatgcaatcccCagcctcaggcaCCggttacataattCCatcacgtgacCCac</u><br><u>atgccctggcatgCCgcgaccacactgCCctcacgtgacCCcatcaatcaaaCCgaccacgcccttctCCAagcaca</u><br><u>tggCCGTTTTCTTGGCAATCGACTCTCGCGGCCGCAAATGCTAA</u>                  |                                                                                                             | GC: 57.51% |
| <b>14dTFBS_f</b>                                                                                                                                                                                                                                                                                                                     | SREBF2, MEF2D, Bhlhe40, Stat4, JUNB, TFEB, ETV5, REST, HIC2, SMAD2::SMAD3::SMAD4a, MTF1, RARA, MAFK, Klf12  |            |
| <u>GGTCTGACAGCGGCCGCACTTGTGCCTGAACACCATATCCCatggggtgatCCactataaatagcCCctc</u><br><u>acgtgacCCcttccaggaaataaCCggatgactcatCCatcacgtgacCCaccggaagtGCCgctgtcccgtgttct</u><br><u>gaCCatgcccaccCCctgtctgtcacctCcttgcacacggcacCCAaggtcagaagttcaaggCCAagactcagcaatt</u><br><u>tCCgaccacgcccttctCCGTTTTCTTGGCAATCGACTCTCGCGGCCGCAAATGCTAA</u> |                                                                                                             | GC: 56.40% |
| <b>14dTFBS_g</b>                                                                                                                                                                                                                                                                                                                     | Ddit3::Cebpa, EN1, GLI2, MAX, TCF4, SMAD2::SMAD3::SMAD4a, SREBF2, PBX1, Hic1, Gmeb1, HIC2, FOXD1, Myc, MTF1 |            |
| <u>GGTCTGACAGCGGCCGCACTTGTGCCTGAACACCATATCCGgatgcaatcccCCtaattagCCgca</u><br><u>ccacactGCCaagcactgCCcgcacctgctCCctgtctgtcacctCCatggggtgatCCcatcaatcaaaCCatgcc</u><br><u>aaccCCcagtttagtaagaagaCCatgcccaccCCgtaaacatCCcatgtgcttCcttgcacacggcacCCGTTTT</u><br><u>CTTGGCAATCGACTCTCGCGGCCGCAAATGCTAA</u>                                |                                                                                                             | GC: 57.25% |
| <b>14dTFBS</b>                                                                                                                                                                                                                                                                                                                       | Zic3, POU5F1:SOX2, Tfc2, Smad3, Sp1, ZNF263, Klf4, Ahr::Arnt, Foxh1, Foxj3, Esrrb, STAT1, TFAP2C, TEAD4     |            |
| <u>GGTCTGACAGCGGCCGCACTTGTGCCTGAACACCATATCCggcccccgctgtgcCCcttgttatgcaa</u><br><u>atCCAAACCGGTTTCcgtctagacaCCccccccccCCggaggaggaggaggaggaggaCCtaaaggaaggC</u><br><u>CcgagacaagcagcggCCtccaatccacaCCataaagtaaacacaacCCagctcaaggtcaCCagaaaatgaaact</u><br><u>gCCtgcctagggcaCCacattcatCCGCGGCCGCAAATGCTAA</u>                           |                                                                                                             | GC: 59.11% |
| <b>12dTFBS</b>                                                                                                                                                                                                                                                                                                                       | Zic3, POU5F1:SOX2, Tfc2, Smad3, Sp1, ZNF263, Klf4, Ahr::Arnt, Foxh1, Foxj3, Esrrb, STAT1                    |            |
| <u>GGTCTGACAGCGGCCGCACTTGTGCCTGAACACCATATCCggcccccgctgtgcCCcttgttatgcaa</u><br><u>atCCAAACCGGTTTCcgtctagacaCCccccccccCCggaggaggaggaggaggaggaCCtaaaggaaggC</u><br><u>CcgagacaagcagcggCCtccaatccacaCCataaagtaaacacaacCCagctcaaggtcaCCagaaaatgaaact</u><br><u>gCCGCGGCCGCAAATGCTAA</u>                                                  |                                                                                                             | GC: 58.85% |

|                                                                                                                                                                                                                                                                                                             |                                                                                                               |            |
|-------------------------------------------------------------------------------------------------------------------------------------------------------------------------------------------------------------------------------------------------------------------------------------------------------------|---------------------------------------------------------------------------------------------------------------|------------|
| <b>10dTFBS</b>                                                                                                                                                                                                                                                                                              | Zic3, POU5F1:SOX2, Tfcp2, Smad3, Sp1, ZNF263, Klf4, Ahr::Arnt, Foxh1, Foxj3                                   |            |
| <u>GGTCTGACAGCGGCCGCACTTGTGCCTGAACACCATATCCggcccccgctgtgcCCctttgttatgcaa</u><br>atCCAAACCGGTTTCCgtctagacaCccccgccccCCggaggaggaggaggaggaggaCctaaaggaaggC<br>CcgagacaagcagcggCctcaatccacaCCataaagtaaacaacacCCGCGGCCGCAAATGCTAA                                                                                |                                                                                                               | GC: 60.56% |
| <b>7dTFBS</b>                                                                                                                                                                                                                                                                                               | Zic3, POU5F1:SOX2, Tfcp2, Smad3, Sp1, ZNF263, Klf4                                                            |            |
| <u>GGTCTGACAGCGGCCGCACTTGTGCCTGAACACCATATCCggcccccgctgtgcCCctttgttatgcaa</u><br>atCCAAACCGGTTTCCgtctagacaCccccgccccCCggaggaggaggaggaggaggaCctaaaggaaggC<br>CGCGGCCGCAAATGCTAA                                                                                                                               |                                                                                                               | GC: 63.19% |
| <b>5dTFBS</b>                                                                                                                                                                                                                                                                                               | Zic3, POU5F1:SOX2, Tfcp2, Smad3, Sp1                                                                          |            |
| <u>GGTCTGACAGCGGCCGCACTTGTGCCTGAACACCATATCCggcccccgctgtgcCCctttgttatgcaa</u><br>atCCAAACCGGTTTCCgtctagacaCccccgccccCCGCGGCCGCAAATGCTAA                                                                                                                                                                      |                                                                                                               | GC: 63.28% |
| <b>13dTFBS_rOri</b>                                                                                                                                                                                                                                                                                         | Zic3, POU5F1:SOX2, Tfcp2, Smad3, Sp1, ZNF263, KLF4, Foxh1, Foxj3, Esrrb, STAT1, TFAP2C, TEAD4                 |            |
| <u>GGTCTGACAGCGGCCGCACTTGTGCCTGAACACCATATCCggcccccgctgtgcCCctttgttatgcaa</u><br>atCCAAACCGGTTTCCgtctagacaCccccgccccCCggaggaggaggaggaggaggaCctaaaggaaggC<br>CtcaatccacaCCataaagtaaacaacacCCagctcaaggtcaCCagaaaatgaaactgCCtgcctagggaCCc<br>acattccatCCGTTTTCTTGCAATCGACTCTCGCGGCCGCAAATGCTAA                  |                                                                                                               | GC: 57.14% |
| <b>13dTFBS_rOri+NFYA (14TFBS)</b>                                                                                                                                                                                                                                                                           | Zic3, POU5F1:SOX2, Tfcp2, Smad3, Sp1, ZNF263, KLF4, NFYA, Foxh1, Foxj3, Esrrb, STAT1, TFAP2C, TEAD4           |            |
| <u>GGTCTGACAGCGGCCGCACTTGTGCCTGAACACCATATCCggcccccgctgtgcCCctttgttatgcaa</u><br>atCCAAACCGGTTTCCgtctagacaCccccgccccCCggaggaggaggaggaggaggaCctaaaggaaggC<br>CcgagccaatcagcggCctcaatccacaCCataaagtaaacaacacCCagctcaaggtcaCCagaaaatgaaact<br>gCCtgcctagggaCCcacattccatCCGTTTTCTTGCAATCGACTCTCGCGGCCGCAAATGCTAA |                                                                                                               | GC: 58.08% |
| <b>13dTFBS_pOri</b>                                                                                                                                                                                                                                                                                         | Zic3, POU5F1:SOX2, Tfcp2, Smad3, Sp1, <i>znf263</i> , <i>klf4</i> , Foxh1, Foxj3, Esrrb, STAT1, TFAP2C, TEAD4 |            |
| <u>GGTCTGACAGCGGCCGCACTTGTGCCTGAACACCATATCCggcccccgctgtgcCCctttgttatgcaa</u><br>atCCAAACCGGTTTCCgtctagacaCccccgccccCctctctctctctctctccCcttctttaCtccaa<br>tccacaCCataaagtaaacaacacCCagctcaaggtcaCCagaaaatgaaactgCCtgcctagggaCCcacattcc<br>atCCGTTTTCTTGCAATCGACTCTCGCGGCCGCAAATGCTAA                         |                                                                                                               | GC: 57.14% |

**Supplemental Table S5: Genome wide ChIP-seq data used**

| <b>GEO Accession</b> | <b>ChIP</b> | <b>Species</b> | <b>Purpose</b>             |
|----------------------|-------------|----------------|----------------------------|
| GSM288355            | Esrrb       | Mouse          | Clustering                 |
| ERR440999            | Klf2        | Mouse          | Clustering                 |
| ERR440998            | Klf2        | Mouse          | Clustering                 |
| GSM288354            | Klf4        | Mouse          | Clustering                 |
| GSM288345            | Nanog       | Mouse          | Clustering                 |
| GSM307140            | Nanog       | Mouse          | Clustering                 |
| GSM1090230           | Nanog       | Mouse          | Clustering                 |
| GSM288346            | POU5F1      | Mouse          | Clustering                 |
| GSM566277            | POU5F1      | Mouse          | Clustering                 |
| GSM307137            | POU5F1      | Mouse          | Clustering                 |
| GSM288348            | Smad1       | Mouse          | Clustering                 |
| GSM288347            | Sox2        | Mouse          | Clustering                 |
| GSM307138            | Sox2        | Mouse          | Clustering                 |
| GSM1050291           | Sox2        | Mouse          | Clustering                 |
| GSM288353            | Stat3       | Mouse          | Clustering                 |
| GSM288350            | Tcfcp2l1    | Mouse          | Clustering                 |
| GSM1505690           | Klf5        | Human          | Clustering                 |
| GSM1505745           | Smad1       | Human          | Clustering                 |
| GSM1505781           | Stat3       | Human          | Clustering                 |
| GSM1505791           | Tcf4        | Human          | Clustering                 |
| GSM1124071           | Nanog       | Human          | Clustering                 |
| GSM1124070           | Nanog       | Human          | Clustering                 |
| GSM1124069           | Sox2        | Human          | Clustering                 |
| GSM1124068           | Sox2        | Human          | Clustering                 |
| GSM1124067           | POU5F1      | Human          | Clustering                 |
| GSE52824             | H3K27ac     | Human          | Clustering                 |
| GSE47949             | H3K27ac     | Mouse          | Clustering                 |
| GSE24164             | EP300       | Mouse          | MTL Validation             |
| GSM288349            | E2F1        | Mouse          | Enrichment Validation      |
| GSM288352            | Zfx         | Mouse          | Enrichment Validation      |
| GSM415050            | Mtf2        | Mouse          | Enrichment Validation      |
| GSM623989            | Prdm14      | Mouse          | Enrichment Validation      |
| GSM1908902           | Med12       | Mouse          | TFBS Repertoire Validation |

|            |       |       |                            |
|------------|-------|-------|----------------------------|
| GSM1908907 | Med23 | Mouse | TFBS Repertoire Validation |
| GSM1163123 | Pol2  | Mouse | TFBS Repertoire Validation |

**Supplemental Table S6: Primers for Enhancer cloning and gene expression and SDM primers for mutagenesis.**

| <b>Enhancer name</b>                       | <b>Forward primer</b>                     | <b>Reverse primer</b>    |
|--------------------------------------------|-------------------------------------------|--------------------------|
| Sox2 (SRR111.1)*                           | GTGGGGTACAGGACATTGAAA                     | CTAGTCACTCATCCCCATGC     |
| Med13l                                     | CTCATCTGTGGTGTCTGTTGTTG                   | GTTCAGGAGGGAGAGTTCTGTG   |
| Sall1_MTL52                                | TAAGCTGTGATGGCCTTATTGC                    | GAACCATTCTCATCTGACTCTGC  |
| Sall1_MTL52core                            | GGTGTGCAGTGGGGATGGGGT                     | TGCCTGGGTAAGAAGGTCCC     |
| Sall1_MTL40                                | GAGTCTTTCAGGACAACACCAT                    | GTCATCTAACAGCAAGCGAATCC  |
| Sall1_MTL28                                | GGCACCTCTAGAAAAGTAAAGCCTG                 | AGCTACACAAAGGTGGGTATCATT |
| Sall1_C1                                   | CTGGGTGAAGTCATTCTGAGAC                    | ATCAACATCCAGGTGTGTCTTCT  |
| Sall1_C2                                   | AGTGAAAGGAGAACTGTTAGATGACC                | CTTAGTAATAGGGGCAGCTTGG   |
| Sall1_129                                  | CGTGGCCTTCTGTCAATg                        | CAACAGTACTCTGAACTCCCCAgT |
| Sall1_Cast                                 | CCGTGGCCTTCTGTCAATa                       | CAACAGTACTCTGAACTCCCCAaT |
| <b>Primer name</b>                         | <b>Sequence</b>                           |                          |
| <b>Med13l enhancer mutagenesis primers</b> |                                           |                          |
| Med13l_GBX2_F                              | agggcacatccttacgtaatggttattatgggggtgggaca |                          |
| Med13l_GBX2_R                              | tgtcccacccccataataaccattacgtaaggagatgccct |                          |
| Med13l_SP1_1_F                             | agggtcatctgagaggagttaacctcaggtagaaaacatc  |                          |
| Med13l_SP1_1_R                             | gatgtttctacctgaggttaactcctctcagatgaccct   |                          |
| Med13l_ZIC3_1_F                            | ggtgacagtcagcatcaaactgtgcaggttgggt        |                          |
| Med13l_ZIC3_1_R                            | accacactgcacagtgtttgatgctgactgtcacc       |                          |
| Med13l_TEAD4_F                             | gtggactccacctggcagtagcggattacagaatggg     |                          |
| Med13l_TEAD4_R                             | cccattctgtaaatccgtactgccaggtggagtccac     |                          |
| Med13l_FOXH1_F                             | ccctcctgttagtggggcctccacctggcattc         |                          |
| Med13l_FOXH1_R                             | gaatgccaggtggaggccccactacacaggagg         |                          |
| Med13l_TFAP2C_F                            | ccacttcctggattcagtcctaccgggtg             |                          |
| Med13l_TFAP2C_R                            | caccgtaggggactgaatccaggaagtgg             |                          |
| Med13l_ZIC3_2_F                            | aaaatgtaaatctaccaatgcagccccatacctcttg     |                          |
| Med13l_ZIC3_2_R                            | ccaagaggtatgggggctgcatgggtagatttacatctt   |                          |
| Med13l_Pou5f1::Sox2_F                      | cttcctcgggcttttaaagataaatctaccctcgcagc    |                          |
| Med13l_Pou5f1::Sox2_R                      | gctgcaggggtagatttatcttttaaagcccagggaag    |                          |
| Med13l_SP1_2_F                             | ccgaggctagagcatactccccacctgcc             |                          |
| Med13l_SP1_2_R                             | ggcaggtggggagtatgctctagcctcgg             |                          |
| <b>Sox2 enhancer mutagenesis primers</b>   |                                           |                          |
| Sox2_SRR111_NFIL3_F                        | gaatccgaggccttagcggcgaacaggttcgagac       |                          |
| Sox2_SRR111_NFIL3_R                        | gtctcgaacctgttcggcgctaaggcctcggattc       |                          |
| Sox2_SRR111_SP1_1_F                        | gcactcaggggcttatgcaggagcatcagg            |                          |
| Sox2_SRR111_SP1_1_R                        | cctgatgctctgcataagccccctgagtgc            |                          |
| Sox2_SRR111_SP1_2_F                        | cttcggtaggggtgatcggagggactgcaac           |                          |
| Sox2_SRR111_SP1_2_R                        | gttgagtcctccgatacaccctaccggaag            |                          |
| Sox2_SRR111_TFAP2C_1_F                     | ccaaaccaagcacagcaccaatgtagtcagctaggtct    |                          |

|                                         |                                                                                             |
|-----------------------------------------|---------------------------------------------------------------------------------------------|
| Sox2_SRR111_TFAP2C_1_R                  | agacctagctgactacattgggtgctgtgcttggttgg                                                      |
| Sox2_SRR111_GBX2_F                      | caggttcttttttaaacctacgtgtcctccaccttcatttgag                                                 |
| Sox2_SRR111_GBX2_R                      | ctcaaatggaaggtggaggacacgtagggttaaaaaagaacctg                                                |
| Sox2_SRR111_ZNF263_1_F                  | ttttaaacctaattgtcctccacgtaccatttgagtcattctaaattct                                           |
| Sox2_SRR111_ZNF263_1_R                  | agaatttaagaatgactcaaatggtagctggaggacaattagggttaaaa                                          |
| Sox2_SRR111_STAT1_F                     | ggcccatcccaggtgattttttaaacctaattgtcctccac                                                   |
| Sox2_SRR111_STAT1_R                     | gtggaggacaattagggttaaaaaatcacctgggatgggcc                                                   |
| Sox2_SRR111_TFAP2C_2_F                  | ccttctctaggcagatccagtggtttacaactggc                                                         |
| Sox2_SRR111_TFAP2C_2_R                  | gccagttgtaaacccactggatctgcctagaggaagg                                                       |
| Sox2_SRR111_ZNF263_2_F                  | tctcctccagctccctgctctaggcagctcc                                                             |
| Sox2_SRR111_ZNF263_2_R                  | ggagctgcctagagcagggagctggaggaga                                                             |
| Sox2_SRR111_SOX3_F                      | gacctccccctgtggttctaagctctcctccagct                                                         |
| Sox2_SRR111_SOX3_R                      | agctggaggagagcttagaaaccacagggggaggt                                                         |
| Sox2_SRR111_POU5F1:SOX2_F               | gagtggggtacaggacactgaagttgagagaggggttcttgtaa                                                |
| Sox2_SRR111_POU5F1:SOX2_R               | ttacaagaaacctctctcaacttcagtgctctgtaccccactc                                                 |
| Sox2_SRR111_ESRRB_F                     | caccaggttatctctggcttcatgatgacctgact                                                         |
| Sox2_SRR111_ESRRB_R                     | ccagtcaggtcatcatgaagccagagataacctggtg                                                       |
| <b>Sall1 MTL 52 mutagenesis primers</b> |                                                                                             |
| +OS_F                                   | CCCATTTCATAACAAAGCAGGAGATTTGTTAC                                                            |
| +OS_R                                   | CCTGCTTTGTTATGCAAATGGGGGGAGGGTG                                                             |
| +ETS_F                                  | CAATGAACGTGTTGCTTTGGGTGGTGCTACTATGACCTTGAGGTCCACAGG                                         |
| +ETS_R                                  | ACCCAAAGCAACACGTTTCATTGTTTCTGCCTGCCCGTCTAGACACCCAATGCAAACATGACTGGTTGAACTGG<br>GCTTTCGGGTGGG |
| +ETS_-FOXP1_F                           | caaaattaatacaggcaaatTTTTTgtggttaaacacaatgtcttctacaccaggag                                   |
| +ETS_-FOXP1_R                           | ctcctgggtagaagacattgtgttaaccacaaaaaaattgcctcgattaattttg                                     |
| +TS_F                                   | cctgtggggacctccattccatagtagcaccacc                                                          |
| +TS_R                                   | ggtggtgctactatggaatggaggtccccacagg                                                          |
| +TS_+E2F1_F                             | cacacatcagcagtaacaaacctccgccctgttctgggaatggggggag                                           |
| +TS_+E2F1_R                             | Ctccccattcccagaacagggcgggagtttgttactgctgatgtgtg                                             |

\* Only the 5' half of 111 was used which corresponded to the TF bound region.

**Supplemental Table S7: Guide RNAs.**

| <b>Deletion</b> | <b>Sequence</b>                                                              |
|-----------------|------------------------------------------------------------------------------|
| Sall1_ΔEC       | 5' gRNA GTCTAGTGGT CTCTATAGCG (tgg)<br>3' gRNA GCAGAGCTAC ACCCTCCGGA G (ggg) |
| Sall1_Δ1        | 5' gRNA GTCTAGTGGT CTCTATAGCG (tgg)<br>3' gRNA GGGTGAGCGA ACGAGCTTGG (agg)   |
| Sall1_Δ2        | 5' gRNA GGGTGAGCGA ACGAGCTTGG (agg)<br>3' gRNA CTTTCTTGG AGACCGGGCG (ggg)    |
| Sall1_Δ3        | 5' gRNA CTTTCTTGG AGACCGGGCG (ggg)<br>3' gRNA GCAGAGCTAC ACCCTCCGGA G (ggg)  |
| Sall1_Δ2-3      | 5' gRNA GGGTGAGCGA ACGAGCTTGG (agg)<br>3' gRNA GCAGAGCTAC ACCCTCCGGA G (ggg) |

**Supplemental Table S8: STARR-seq data used**

| <b>GEO Accession</b> | <b>STARR-seq</b>    | <b>Species</b> | <b>Purpose</b>                |
|----------------------|---------------------|----------------|-------------------------------|
| GSM4261631           | RNA 2iL rep 1       | Mouse          | TFBS Repertoire<br>Validation |
| GSM4261632           | RNA 2iL rep 2       | Mouse          |                               |
| GSM4261635           | Input DNA 2iL rep 1 | Mouse          |                               |
| GSM4261636           | Input DNA 2iL rep 2 | Mouse          |                               |
