# Supplementary material for: A flexible repertoire of transcription factor binding sites and a diversity threshold determines enhancer activity in embryonic stem cells
Source: HighWire-hosted journal article supplement (doi:10.1101/gr.272468.120), 2021-03-12
Supplement: Supplemental_Table_S1.xlsx [file Supplemental_Table_S1.xlsx]

## Sheet: Mouse_Tfbound_Clusters
Supplemental Table S1: Clustering of transcription factor bound regions in mouse and human ESCs.
Chr_MM10	MTL_start_MM10	MTL_stop_MM10	Lift_hg19_2k_chr	Lift_hg19_2k_start	Lift_hg19_2k_stop	ID	Mouse_Ac	Human_Ac	Oct4TF_M	Sox2_M	Nanog_M	Essrb_M	Klf4_M	Klf2_M	Smad1_M	Stat3_M	Tfcp2l1_M	Sum_M	Oct4TF_H	Sox2_H	Nanog_H	Stat3_H	Smad1_H	Klf5_H	Tcf4_H	Sum_H	Cluster_M	Cluster_M_Name
chr19	23134728	23135200	chr9	73034206	73036206	2022147	20.2276	4.48603	0	0	1	0	0	1	0	0	0	2	0	0	0	0	0	0	0	0	1	CHEF
chr2	168765447	168765847	chr20	50416418	50418418	1026336	19.375	8.86871	0	0	0	1	0	0	0	0	0	1	0	0	0	0	0	0	1	1	1	CHEF
chr5	123138114	123139017	chr12	122237350	122239350	6034389	19.1931	11.0931	1	1	1	0	1	1	0	0	0	5	0	0	0	1	1	0	1	3	1	CHEF
chr7	16400907	16401361	chr19	47614589	47616589	3038021	19.1265	13.1683	0	0	1	0	1	1	0	0	0	3	0	0	0	0	0	0	0	0	1	CHEF
chr4	46452178	46452578	chr9	100746185	100748185	1029419	18.8512	4.65286	0	0	1	0	0	0	0	0	0	1	0	0	0	0	0	0	0	0	1	CHEF
chr17	46857072	46857879	chr6	42749691	42751691	2019339	18.806	9.85302	0	0	1	0	0	1	0	0	0	2	0	0	0	0	0	0	0	0	1	CHEF
chr19	23135651	23136114	chr9	73033279	73035279	3022148	18.5789	5.02174	0	0	1	0	0	1	0	0	1	3	0	0	0	0	0	0	0	0	1	CHEF
chr8	79029236	79029833	chr4	146857641	146859641	2042155	18.0415	11.9783	0	0	1	0	0	1	0	0	0	2	0	0	0	0	0	0	1	1	1	CHEF
chr7	73617783	73618698	chr15	93351837	93353837	5039338	17.8698	5.81497	0	0	1	1	1	1	0	0	1	5	0	0	0	1	0	1	0	2	1	CHEF
chr11	77686484	77687907	chr17	27619123	27621123	2007218	17.5412	8.50926	0	0	1	0	0	1	0	0	0	2	0	0	0	0	0	0	0	0	1	CHEF
chr4	133813333	133814617	chr1	26946254	26948254	5031129	17.4281	3.96559	0	0	1	0	1	1	0	1	1	5	1	0	0	1	0	0	0	2	1	CHEF
chr2	84743481	84743881	chr11	57404923	57406923	1024585	17.236	9.14624	0	0	0	0	0	1	0	0	0	1	0	0	0	0	0	0	0	0	1	CHEF
chr2	84742440	84742840	chr11	57406051	57408051	1024584	16.4584	8.80567	0	0	1	0	0	0	0	0	0	1	1	1	1	1	0	0	1	5	1	CHEF
chr17	46856540	46856954	chr6	42750355	42752355	1019338	16.3735	7.92943	0	0	0	0	0	1	0	0	0	1	0	0	0	0	0	0	0	0	1	CHEF
chr6	148944489	148945093	chr12	31476062	31478062	2037762	16.0827	5.73657	0	0	1	0	0	1	0	0	0	2	0	0	0	0	0	0	1	1	1	CHEF
chr1	178336322	178336728	chr1	245025399	245027399	1002562	15.9467	8.38337	0	0	0	0	0	1	0	0	0	1	0	0	0	0	1	1	1	3	1	CHEF
chr19	23136315	23136910	chr9	73032504	73034504	2022149	15.8249	3.58796	0	0	0	0	1	0	0	0	1	2	1	0	0	0	0	0	0	1	1	CHEF
chr5	123136535	123136935	chr12	122235427	122237427	1034388	15.739	5.2633	0	0	0	1	0	0	0	0	0	1	0	0	0	0	0	0	0	0	1	CHEF
chr19	5845560	5846214	chr11	65188918	65190918	4021787	15.6643	6.84197	0	0	1	1	1	1	0	0	0	4	0	0	0	0	0	1	0	1	1	CHEF
chr2	103795714	103796114	chr11	34074133	34076133	1024794	15.6191	6.27654	0	0	0	0	1	0	0	0	0	1	0	0	0	0	0	0	0	0	1	CHEF
chr4	133752646	133753087	chr1	27022635	27024635	1031124	15.5225	11.3222	0	0	0	0	0	1	0	0	0	1	0	0	0	0	0	0	0	0	1	CHEF
chr8	79030050	79030550	chr4	146856819	146858819	2042156	15.3922	8.73036	0	0	1	0	0	1	0	0	0	2	0	0	0	0	0	0	0	0	1	CHEF
chr1	86442347	86442786	chr2	232478014	232480014	2001179	15.3276	5.82354	0	0	1	0	0	1	0	0	0	2	0	0	0	1	0	0	1	2	1	CHEF
chr6	120666443	120667335	chr22	17849409	17851409	2037190	15.3116	8.26577	0	0	1	0	0	1	0	0	0	2	0	0	1	1	0	1	0	3	1	CHEF
chr7	5062298	5062707	chr19	56165693	56167693	1037897	15.2371	8.5237	0	0	0	0	0	1	0	0	0	1	0	0	0	0	0	0	0	0	1	CHEF
chr10	122985943	122986343	chr12	62995587	62997587	1005250	15.2226	8.4742	0	0	1	0	0	0	0	0	0	1	0	0	0	1	0	0	0	1	1	CHEF
chr6	148992289	148992812	chr12	31538488	31540488	5037769	15.1994	8.19346	1	1	1	0	0	1	0	1	0	5	1	1	1	0	1	0	1	5	1	CHEF
chr3	34756399	34757102	chr3	181576530	181578530	6027137	15.136	6.80799	1	1	1	1	0	0	1	0	1	6	0	1	1	0	1	0	1	4	1	CHEF
chr19	5846506	5846982	chr11	65187897	65189897	4021788	14.8752	6.93553	1	1	0	0	0	0	0	1	1	4	0	0	0	0	0	0	0	0	1	CHEF
chr3	95674241	95675098	chr1	150533628	150535628	3027905	14.5328	5.94773	0	0	0	1	1	0	0	1	0	3	0	0	0	1	0	1	0	2	1	CHEF
chr6	72787297	72788249	chr2	85361011	85363011	7036337	14.507	7.47801	1	1	1	1	1	0	0	0	1	6	1	1	1	0	0	0	1	4	1	CHEF
chr15	81522903	81523555	chr22	41417506	41419506	3015722	14.463	5.37369	0	0	1	0	1	1	0	0	0	3	0	0	0	0	0	1	1	2	1	CHEF
chr15	98871570	98872449	chr12	49453371	49455371	4016236	14.0557	7.41976	1	0	1	0	1	1	0	0	0	4	1	0	0	0	1	0	1	3	1	CHEF
chr4	123664467	123664867	chr1	39570184	39572184	1030565	13.9294	5.61647	0	0	1	0	0	0	0	0	0	1	0	0	0	0	0	0	0	0	1	CHEF
chr1	86503919	86504545	chr2	232544946	232546946	3001186	13.8561	7.22886	0	1	1	0	0	1	0	0	0	3	0	0	0	1	0	0	0	1	1	CHEF
chr11	74831836	74832394	chr17	2302215	2304215	3007089	13.8455	4.22964	0	0	1	0	0	1	0	0	1	3	0	0	0	1	0	0	0	1	1	CHEF
chr3	34650788	34651459	chr3	181429849	181431849	2027129	13.6823	8.27209	0	0	1	0	0	1	0	0	0	2	0	0	0	0	0	0	0	0	1	CHEF
chr1	134560931	134561403	chr1	202775600	202777600	2001869	13.617	6.58961	0	0	1	0	0	1	0	0	0	2	0	0	0	0	0	0	0	0	1	CHEF
chr11	69671172	69671589	chr17	7476092	7478092	2006896	13.6111	6.01071	0	0	1	0	0	1	0	0	0	2	0	0	0	0	0	0	0	0	1	CHEF
chr2	168764484	168764959	chr20	50415343	50417343	4026335	13.5941	6.09077	1	1	1	0	0	0	1	0	0	4	1	0	1	0	1	0	1	4	1	CHEF
chr14	54575535	54576023	chr14	23449005	23451005	4013636	13.592	3.7736	1	0	1	0	1	1	0	0	0	4	0	0	0	0	0	0	0	0	1	CHEF
chr15	81522082	81522498	chr22	41416658	41418658	2015721	13.5465	5.62426	0	0	1	0	1	0	0	0	0	2	0	0	0	0	0	1	0	1	1	CHEF
chr12	109948234	109948821	chr14	101688548	101690548	6010792	13.5121	2.05691	1	1	1	1	1	1	0	0	0	6	1	1	1	0	0	0	0	3	1	CHEF
chr5	123134862	123135836	chr12	122233773	122235773	6034387	13.4862	4.07132	1	1	1	0	1	0	1	0	0	5	0	0	0	0	0	0	0	0	1	CHEF
chr19	5847262	5847662	chr11	65187028	65189028	1021789	13.4563	6.53062	0	0	0	1	0	0	0	0	0	1	0	0	0	0	0	0	0	0	1	CHEF
chr13	44705303	44705993	chr6	15207757	15209757	5011672	13.3963	5.5757	1	1	1	1	0	0	1	0	0	5	1	1	1	0	1	0	1	5	1	CHEF
chr1	86528071	86528580	chr2	232574089	232576089	3001192	13.3958	6.90434	1	0	1	0	0	1	0	0	0	3	0	0	0	0	0	0	0	0	1	CHEF
chr3	34757797	34758272	chr3	181577184	181579184	7027138	13.3759	5.77063	1	1	1	1	1	0	1	1	0	7	0	1	1	0	1	0	1	4	1	CHEF
chr4	141545785	141546185	chr1	16161548	16163548	1031644	13.3311	5.64762	0	0	1	0	0	0	0	0	0	1	0	0	0	0	1	0	0	1	1	CHEF
chr7	126501898	126502298	chr16	28834716	28836716	1040300	13.309	7.81007	0	0	1	0	0	0	0	0	0	1	0	0	0	1	0	1	0	2	1	CHEF
chr9	62343174	62343619	chr15	69110221	69112221	1044749	13.2518	8.86901	0	0	0	0	0	1	0	0	0	1	0	0	0	0	0	0	0	0	1	CHEF
chr14	62759788	62760188	chr13	52024916	52026916	1013834	13.2281	5.47774	0	0	1	0	0	0	0	0	0	1	0	0	0	0	0	0	0	0	1	CHEF
chr9	80067519	80067919	chr6	76311432	76313432	1045218	13.1743	5.69144	0	0	1	0	0	0	0	0	0	1	0	0	0	1	0	0	0	1	1	CHEF
chr8	84661037	84661437	chr19	13264835	13266835	1042315	13.1268	7.6716	0	0	0	0	0	0	0	0	1	1	0	0	0	1	0	0	1	2	1	CHEF
chr8	84661830	84662363	chr19	13263734	13265734	1042316	13.1182	8.10418	0	0	0	0	0	1	0	0	0	1	0	0	0	0	0	0	0	0	1	CHEF
chr6	65021685	65022306	chr4	95085540	95087540	7036222	13.1068	3.26963	1	1	1	1	1	1	0	1	0	7	0	0	1	0	0	0	1	2	1	CHEF
chr19	4810247	4810812	chr11	66384177	66386177	7021693	12.9832	2.82826	1	1	1	1	1	0	1	1	0	7	0	0	0	0	0	0	0	0	1	CHEF
chr6	136470339	136471356	chr12	14412482	14414482	8037544	12.9555	4.79132	1	1	1	1	1	1	0	0	1	7	0	0	1	1	1	1	0	4	1	CHEF
chr12	108793645	108794658	chr14	100705403	100707403	2010773	12.9334	5.72019	0	0	1	0	0	1	0	0	0	2	0	0	0	0	0	0	0	0	1	CHEF
chrX	58037927	58039003	chrX	136655442	136657442	3046485	12.8093	5.90834	0	0	1	1	0	1	0	0	0	3	0	0	0	0	0	0	1	1	1	CHEF
chr15	25753886	25754931	chr5	16739837	16741837	3014768	12.7186	7.44808	1	1	1	0	0	0	0	0	0	3	1	1	1	0	1	0	1	5	1	CHEF
chr17	66479622	66480659	chr18	8661182	8663182	8019727	12.7088	2.48456	1	1	1	1	1	1	1	0	1	8	1	1	1	0	0	0	1	4	1	CHEF
chr1	136674378	136675421	chr1	200332630	200334630	5001976	12.602	3.48905	1	1	1	1	0	0	0	0	1	5	1	0	1	0	1	0	1	4	1	CHEF
chr12	101082295	101082908	chr14	91974706	91976706	2010581	12.5824	6.83484	0	0	1	1	0	0	0	0	0	2	0	0	0	0	0	0	0	0	1	CHEF
chr3	65658518	65659696	chr3	156533298	156535298	6027421	12.5772	1.78354	1	1	1	1	1	1	0	0	0	6	1	0	0	1	1	1	0	4	1	CHEF
chr1	180888500	180889337	chr1	226132495	226134495	6002646	12.5276	3.40472	1	1	1	1	1	1	0	0	0	6	1	1	1	0	1	0	0	4	1	CHEF
chr15	98990671	98991887	chr12	49625931	49627931	4016250	12.5012	1.24198	0	1	0	1	1	0	0	0	1	4	0	0	0	0	0	0	1	1	1	CHEF
chr8	84655526	84655995	chr19	13274395	13276395	4042313	12.4781	8.58368	0	1	0	0	1	0	0	1	1	4	0	1	1	0	1	0	1	4	1	CHEF
chr19	5802485	5802901	chr11	65265491	65267491	2021778	12.4712	6.07423	0	1	0	0	0	0	0	0	1	2	0	0	0	1	1	0	0	2	1	CHEF
chr7	63956702	63957538	chr15	31598030	31600030	6039182	12.4597	4.70485	1	1	1	1	1	1	0	0	0	6	1	1	1	0	0	0	1	4	1	CHEF
chr19	5803155	5803941	chr11	65264331	65266331	6021779	12.4555	7.36527	0	1	1	1	1	1	0	0	1	6	0	0	0	1	0	0	0	1	1	CHEF
chr9	114584281	114584773	chr3	32821384	32823384	5045891	12.4471	7.48972	1	1	1	0	1	0	1	0	0	5	1	1	1	1	1	1	1	7	1	CHEF
chr14	115042031	115042431	chr13	92000332	92002332	1014389	12.4006	6.67082	0	0	0	0	0	1	0	0	0	1	0	0	0	0	0	0	0	0	1	CHEF
chr4	133756775	133757543	chr1	27018337	27020337	2031127	12.3567	3.40705	0	0	0	0	0	1	0	0	1	2	1	0	0	0	0	0	0	1	1	CHEF
chr4	141546593	141547112	chr1	16160284	16162284	4031645	12.3298	7.2393	0	1	1	0	1	1	0	0	0	4	0	1	1	1	1	0	1	5	1	CHEF
chr9	72531631	72532690	chr15	56535150	56537150	3045067	12.1895	7.77753	0	0	1	0	0	1	0	0	1	3	0	0	0	0	0	0	1	1	1	CHEF
chr1	86310888	86311492	chr2	232274654	232276654	7001170	12.1626	6.05734	1	1	1	0	1	0	1	1	1	7	1	1	1	0	1	0	1	5	1	CHEF
chr4	133039108	133039583	chr1	27900822	27902822	3031044	12.1311	6.64447	1	0	1	0	0	1	0	0	0	3	0	0	0	0	0	0	0	0	1	CHEF
chr10	67002634	67003581	chr10	65388754	65390754	7004014	12.1256	5.79106	1	1	1	0	1	1	0	0	1	6	1	1	1	0	1	0	1	5	1	CHEF
chr2	129799861	129801090	chr20	2081543	2083543	5025278	12.0867	5.55125	0	0	1	1	1	1	0	0	1	5	0	0	0	0	0	0	1	1	1	CHEF
chr4	119071419	119072502	chr1	43473400	43475400	8030428	11.9946	5.69434	1	1	1	1	1	1	1	0	1	8	1	1	1	0	1	1	1	6	1	CHEF
chr17	29463964	29464364	chr6	37104568	37106568	1018758	11.9679	7.3577	1	0	0	0	0	0	0	0	0	1	0	1	1	1	1	0	1	5	1	CHEF
chr6	120665321	120665773	chr22	17848629	17850629	2037189	11.9002	7.49708	0	0	1	0	0	1	0	0	0	2	0	0	1	1	0	1	1	4	1	CHEF
chr14	70634728	70635288	chr8	21906739	21908739	4014014	11.8988	1.05403	0	1	1	0	1	0	1	0	0	4	0	0	0	0	0	0	1	1	1	CHEF
chr1	86487298	86487953	chr2	232526082	232528082	6001182	11.8511	2.79731	1	1	1	0	1	1	0	0	1	6	0	0	0	1	0	1	0	2	1	CHEF
chr11	58008335	58008964	chr5	154133507	154135507	3006493	11.7607	6.28559	0	0	1	1	0	1	0	0	0	3	0	0	0	0	0	0	0	0	1	CHEF
chr16	22412799	22413278	chr3	185798024	185800024	4017064	11.7213	4.51983	0	1	1	1	0	0	1	0	0	4	0	0	0	0	0	0	0	0	1	CHEF
chr17	35502469	35503129	chr6	31140569	31142569	3019055	11.6769	7.49331	0	1	0	1	0	0	0	0	1	3	1	1	1	0	0	0	1	4	1	CHEF
chr15	96709529	96710113	chr12	46776326	46778326	2016138	11.5758	6.49465	0	0	1	0	0	1	0	0	0	2	0	0	0	1	1	0	0	2	1	CHEF
chr15	96698734	96699232	chr12	46764483	46766483	2016135	11.5528	4.52757	0	0	1	0	0	1	0	0	0	2	0	0	0	0	0	0	1	1	1	CHEF
chr17	29450819	29451714	chr6	37092966	37094966	7018756	11.4895	6.67774	1	1	1	1	0	1	1	0	1	7	0	0	1	1	1	0	1	4	1	CHEF
chr4	141291307	141292021	chr1	16493782	16495782	6031618	11.432	3.06358	1	0	1	1	1	1	0	0	1	6	0	0	0	0	0	0	1	1	1	CHEF
chr5	118436359	118437027	chr12	116864201	116866201	5034148	11.4169	4.8598	1	1	1	1	0	0	1	0	0	5	1	1	1	0	1	0	1	5	1	CHEF
chr2	165857426	165857866	chr20	45946218	45948218	2026122	11.3365	13.3084	1	1	0	0	0	0	0	0	0	2	0	0	0	1	0	0	1	2	1	CHEF
chr10	80150726	80151137	chr19	1250098	1252098	1004378	11.3316	9.91258	0	0	0	0	0	1	0	0	0	1	0	0	0	0	0	0	0	0	1	CHEF
chr3	133532279	133533617	chr4	106081866	106083866	5028554	11.3135	0.640517	1	1	1	1	0	1	0	0	0	5	0	0	1	1	1	0	1	4	1	CHEF
chr7	133114865	133115605	chr10	126839799	126841799	8040537	11.3095	5.52154	1	1	1	1	1	1	0	1	1	8	0	0	0	0	1	0	1	2	1	CHEF
chr6	72898145	72899110	chr2	85198585	85200585	4036343	11.2825	6.43098	1	1	1	0	0	1	0	0	0	4	0	0	0	0	0	0	0	0	1	CHEF
chr11	23257269	23257719	chr2	61762892	61764892	2005888	11.2743	7.03154	0	0	1	0	1	0	0	0	0	2	0	0	0	0	0	0	1	1	1	CHEF
chr7	73557653	73558784	chr15	93425270	93427270	3039332	11.2209	7.23632	0	0	1	1	0	1	0	0	0	3	0	0	0	0	0	0	0	0	1	CHEF
chr4	106839896	106840325	chr1	54953137	54955137	2030100	11.1798	5.48596	0	0	1	0	0	1	0	0	0	2	0	0	0	0	1	0	1	2	1	CHEF
chr13	35738186	35738608	chr6	4772172	4774172	3011448	11.131	4.07612	1	1	1	0	0	0	0	0	0	3	1	1	1	0	1	0	1	5	1	CHEF
chr11	102316606	102317007	chr17	42295004	42297004	1008333	11.0442	6.5547	0	0	0	0	0	1	0	0	0	1	0	0	0	0	0	1	0	1	1	CHEF
chr6	100377870	100378547	chr3	72585181	72587181	8036866	11.0059	1.25859	1	1	1	1	1	1	1	0	1	8	0	0	1	0	0	0	1	2	1	CHEF
chr6	82772826	82773503	chr2	75061557	75063557	6036399	10.9804	5.85665	1	1	0	1	0	1	0	0	1	5	1	0	0	0	0	0	1	2	1	CHEF
chr3	87150992	87151392	chr1	157987981	157989981	1027639	10.9262	5.84321	0	0	1	0	0	0	0	0	0	1	0	0	1	0	0	0	0	1	1	CHEF
chr11	77984344	77984744	chr17	27275727	27277727	1007246	10.8686	7.64703	0	0	0	0	0	1	0	0	0	1	0	0	0	0	0	0	1	1	1	CHEF
chr8	33913709	33915194	chr8	30256852	30258852	6041406	10.8619	4.52146	1	1	1	1	1	1	0	0	0	6	0	0	0	0	0	0	0	0	1	CHEF
chr16	22428840	22429279	chr3	185814706	185816706	2017066	10.8547	1.56407	0	1	0	0	1	0	0	0	0	2	1	0	1	0	1	0	1	4	1	CHEF
chr13	95535334	95536082	chr5	76101609	76103609	2012517	10.8391	5.48596	1	0	1	0	0	0	0	0	0	2	0	0	1	0	1	0	1	3	1	CHEF
chr4	33247436	33247853	chr6	89790624	89792624	2029146	10.8227	4.35485	0	0	1	0	0	1	0	0	0	2	0	0	0	0	1	0	0	1	1	CHEF
chr19	3842361	3843029	chr11	67894731	67896731	6021639	10.8193	6.1446	1	0	1	1	1	0	1	0	1	6	0	0	0	1	0	0	0	1	1	CHEF
chr3	96576679	96577527	chr1	145454656	145456656	2027956	10.7282	3.85169	0	0	1	1	0	0	0	0	0	2	0	0	1	0	1	1	1	4	1	CHEF
chrX	7764859	7765325	chrX	48897700	48899700	3046179	10.6859	5.96793	1	1	1	0	0	0	0	0	0	3	0	0	0	0	0	0	0	0	1	CHEF
chr5	28209713	28210338	chr7	155301748	155303748	7032519	10.6713	0.849649	1	1	1	1	1	1	1	0	0	7	1	1	1	0	1	0	1	5	1	CHEF
chr6	136468322	136468722	chr12	14409694	14411694	1037543	10.6403	6.5344	0	0	0	0	0	0	0	0	1	1	1	1	1	1	1	0	1	6	1	CHEF
chr14	76505838	76506282	chr13	45008403	45010403	3014094	10.5899	3.05318	0	0	1	0	0	1	0	0	1	3	1	0	0	1	0	0	0	2	1	CHEF
chr7	79659863	79660874	chr15	90117867	90119867	2039419	10.5879	3.98062	0	0	1	0	0	1	0	0	0	2	0	0	1	0	0	0	0	1	1	CHEF
chr1	133019260	133019710	chr1	204493397	204495397	4001767	10.5613	2.71198	1	1	1	0	0	0	0	0	1	4	0	0	0	0	0	0	0	0	1	CHEF
chr12	73085801	73086601	chr14	61145545	61147545	7010033	10.5588	2.46747	1	1	1	1	1	1	1	0	0	7	1	1	1	0	1	0	1	5	1	CHEF
chr8	120334248	120335290	chr16	85360799	85362799	4043203	10.5376	3.73662	0	1	1	1	0	0	0	0	1	4	0	1	1	0	1	0	1	4	1	CHEF
chr17	29491850	29492250	chr6	37138280	37140280	1018763	10.5272	4.48768	0	0	0	1	0	0	0	0	0	1	0	0	1	0	1	0	0	2	1	CHEF
chrX	58039765	58040244	chrX	136657044	136659044	3046486	10.5019	5.22792	1	1	1	0	0	0	0	0	0	3	1	0	1	0	1	0	1	4	1	CHEF
chr11	88139162	88139998	chr17	55992711	55994711	3007584	10.4976	1.99662	0	1	1	1	0	0	0	0	0	3	0	0	0	0	0	0	1	1	1	CHEF
chr8	84656449	84657162	chr19	13273117	13275117	3042314	10.4904	7.8201	0	0	1	0	1	0	0	0	1	3	0	0	0	0	0	0	0	0	1	CHEF
chr5	151368275	151369206	chr13	34115944	34117944	4035417	10.4546	6.17532	0	0	1	0	1	1	0	0	1	4	1	1	1	0	1	0	1	5	1	CHEF
chr14	120910584	120911160	chr13	98627525	98629525	2014471	10.4526	6.66524	0	0	1	0	0	1	0	0	0	2	0	0	0	1	0	0	0	1	1	CHEF
chr8	106619466	106619918	chr16	68793788	68795788	3042827	10.4226	2.74832	1	1	1	0	0	0	0	0	0	3	0	0	0	0	0	0	0	0	1	CHEF
chr17	80800947	80801815	chr2	39742735	39744735	6019949	10.4059	2.83665	0	1	1	1	1	1	1	0	0	6	0	0	1	0	0	0	1	2	1	CHEF
chr4	123624375	123624885	chr1	39606846	39608846	6030553	10.4001	3.0798	1	1	1	1	0	0	1	0	1	6	0	1	1	0	1	0	1	4	1	CHEF
chr7	28380970	28381650	chr19	39893460	39895460	3038434	10.3757	6.91824	0	0	1	0	0	1	0	0	1	3	0	0	0	0	0	0	0	0	1	CHEF
chr5	142961845	142962329	chr7	5633060	5635060	4035135	10.3691	5.58532	0	1	1	0	1	1	0	0	0	4	0	0	0	0	0	0	1	1	1	CHEF
chr11	120231010	120231828	chr17	79366583	79368583	4009118	10.2599	2.35247	0	1	1	0	0	1	0	0	1	4	0	1	1	1	1	1	1	6	1	CHEF
chr1	133492453	133493748	chr1	203964261	203966261	5001800	10.2153	2.40925	0	1	1	0	1	1	0	0	1	5	0	1	1	0	1	0	1	4	1	CHEF
chr9	114583746	114584165	chr3	32821941	32823941	1045890	10.2033	5.22635	0	0	0	0	0	1	0	0	0	1	1	1	1	1	1	1	1	7	1	CHEF
chr11	60176550	60177274	chr17	17685738	17687738	5006587	10.1886	2.63806	1	0	1	1	1	1	0	0	0	5	0	0	1	0	0	0	1	2	1	CHEF
chr16	90283111	90283872	chr21	33102392	33104392	2017830	10.1806	5.0094	1	0	0	0	0	1	0	0	0	2	1	1	1	0	0	0	1	4	1	CHEF
chr7	73537520	73538081	chr15	93446724	93448724	3039329	10.1526	3.11626	0	0	1	0	1	1	0	0	0	3	0	0	1	1	1	1	1	5	1	CHEF
chr11	19920073	19920875	chr2	65662355	65664355	4005777	10.1362	2.78173	1	0	1	1	0	1	0	0	0	4	0	0	0	1	0	0	1	2	1	CHEF
chr8	89003275	89004435	chr16	51145060	51147060	8042475	10.131	1.18652	1	1	1	1	1	0	1	1	1	8	1	0	1	0	0	0	0	2	1	CHEF
chr17	70747660	70748197	chr18	3602754	3604754	3019773	10.126	7.01783	1	1	1	0	0	0	0	0	0	3	1	1	1	0	1	0	1	5	1	CHEF
chr11	62494626	62495139	chr17	16188406	16190406	4006684	10.0996	1.55127	1	0	1	1	0	0	1	0	0	4	1	0	1	0	0	0	0	2	1	CHEF
chr10	77197290	77197736	chr21	46797522	46799522	2004240	10.0658	3.79153	0	1	0	1	0	0	0	0	0	2	1	1	1	0	1	0	1	5	1	CHEF
chr6	122766086	122766867	chr12	8123789	8125789	6037254	10.0343	2.85716	1	1	1	1	1	1	0	0	0	6	0	0	0	0	0	0	0	0	1	CHEF
chr13	63563129	63563530	chr9	98267387	98269387	1012161	10.0264	5.1011	0	0	0	0	0	1	0	0	0	1	0	0	0	0	1	0	1	2	1	CHEF
chr12	39997632	39998494	chr7	12768203	12770203	5009639	10.0035	2.82099	1	1	1	1	0	0	0	0	1	5	0	1	0	0	1	0	0	2	1	CHEF
chr1	132200855	132201343	chr1	205413123	205415123	6001726	9.98454	4.97787	1	1	1	0	1	1	0	0	0	5	0	1	1	1	1	0	1	5	1	CHEF
chr8	33912955	33913367	chr8	30258078	30260078	3041405	9.9789	3.9401	1	1	0	0	0	0	0	0	1	3	0	0	0	0	0	0	0	0	1	CHEF
chr4	129232056	129232900	chr1	33224673	33226673	2030831	9.96506	6.48227	0	0	1	1	0	0	0	0	0	2	0	0	0	1	0	1	0	2	1	CHEF
chr9	114527927	114528387	chr3	32910346	32912346	2045877	9.96137	6.30175	0	0	1	0	0	1	0	0	0	2	1	1	1	1	1	0	1	6	1	CHEF
chr1	132007480	132008187	chr1	205599883	205601883	2001712	9.9439	4.68538	0	0	1	0	0	1	0	0	0	2	1	0	0	0	1	1	1	4	1	CHEF
chr3	21935978	21936415	chr3	177076772	177078772	2026944	9.94332	5.21133	0	0	1	0	0	1	0	0	0	2	1	1	1	0	1	0	1	5	1	CHEF
chr13	95534140	95534626	chr5	76103017	76105017	6012516	9.88463	6.16737	1	1	1	0	0	1	0	1	1	6	1	1	1	1	1	0	1	6	1	CHEF
chr11	95990870	95991317	chr17	47090578	47092578	2007847	9.86314	4.00359	0	0	1	0	0	1	0	0	0	2	0	0	0	1	1	0	0	2	1	CHEF
chr11	97279500	97280551	chr17	36411676	36413676	3007963	9.82312	2.69867	0	0	1	0	0	1	0	0	1	3	0	0	0	0	0	1	1	2	1	CHEF
chr12	12787871	12788971	chr2	16242216	16244216	6009354	9.82111	5.52744	1	0	1	1	1	1	0	0	1	6	0	0	0	0	0	0	0	0	1	CHEF
chr5	103724191	103725192	chr4	87880107	87882107	8033563	9.81503	6.8657	1	1	1	1	1	1	1	0	1	8	1	1	1	0	1	0	1	5	1	CHEF
chr13	48545259	48546226	chr9	96928276	96930276	3011759	9.80797	5.79558	0	0	1	1	0	1	0	0	0	3	0	0	0	0	0	1	1	2	1	CHEF
chr11	72576348	72576921	chr17	4298970	4300970	3007027	9.78945	5.78591	1	1	1	0	0	0	0	0	0	3	1	1	1	1	1	0	1	6	1	CHEF
chr12	12784181	12784727	chr2	16245003	16247003	4009352	9.78893	7.94419	1	1	1	0	0	0	0	1	0	4	0	0	1	0	1	0	1	3	1	CHEF
chr10	91181574	91182033	chr12	98896668	98898668	3004780	9.78132	3.5959	0	0	1	0	1	1	0	0	0	3	0	0	0	0	1	1	1	3	1	CHEF
chr9	78527279	78527700	chr6	74289278	74291278	2045202	9.77641	7.60941	0	0	1	0	0	1	0	0	0	2	0	1	1	0	1	0	1	4	1	CHEF
chr18	69782075	69782603	chr18	52776718	52778718	5021280	9.7666	1.10113	1	1	1	1	1	0	0	0	0	5	1	1	1	0	1	0	0	4	1	CHEF
chr1	180924593	180925364	chr1	226086129	226088129	5002651	9.75092	4.3245	1	1	1	1	1	0	0	0	0	5	1	1	1	0	1	0	1	5	1	CHEF
chr10	4386547	4387362	chr6	151710512	151712512	3002989	9.722	8.18338	0	0	1	0	1	1	0	0	0	3	0	1	0	1	0	1	1	4	1	CHEF
chr5	142440410	142440847	chr7	4783792	4785792	3035074	9.72077	0.978744	0	0	1	0	1	1	0	0	0	3	0	0	1	0	1	0	1	3	1	CHEF
chr7	30464838	30465834	chr19	36336092	36338092	3038587	9.71111	1.0226	0	1	1	1	0	0	0	0	0	3	0	0	0	0	1	0	0	1	1	CHEF
chr12	12787150	12787599	chr2	16243286	16245286	3009353	9.70936	7.56491	1	1	1	0	0	0	0	0	0	3	0	0	0	0	1	0	0	1	1	CHEF
chr17	29465318	29465718	chr6	37105732	37107732	1018759	9.69568	7.00446	0	0	0	1	0	0	0	0	0	1	0	0	0	0	0	0	0	0	1	CHEF
chr2	71745070	71745572	chr2	173244681	173246681	3024352	9.67871	6.03777	1	1	0	1	0	0	0	0	0	3	1	1	1	0	1	0	1	5	1	CHEF
chr13	97435900	97436300	chr5	73728197	73730197	1012580	9.64168	1.55088	0	0	0	1	0	0	0	0	0	1	0	1	1	0	1	1	1	5	1	CHEF
chr8	89006413	89006874	chr16	51146836	51148836	3042476	9.59671	1.26835	0	1	1	0	0	1	0	0	0	3	0	0	0	0	0	0	1	1	1	CHEF
chr3	123508163	123508642	chr4	119198846	119200846	2028427	9.57302	4.5652	0	0	1	0	0	1	0	0	0	2	0	0	0	0	1	0	0	1	1	CHEF
chr11	58009414	58010166	chr5	154135334	154137334	2006494	9.55604	6.52791	0	0	1	0	0	1	0	0	0	2	0	0	0	0	1	0	0	1	1	CHEF
chr17	47571542	47572091	chr6	41932609	41934609	5019383	9.53914	4.53856	1	1	1	1	0	0	0	1	0	5	1	1	1	0	1	0	1	5	1	CHEF
chr16	22411654	22412187	chr3	185796895	185798895	5017063	9.52798	3.97114	1	1	1	0	0	1	0	0	1	5	0	0	0	0	0	0	0	0	1	CHEF
chr8	33916100	33916574	chr8	30254169	30256169	5041407	9.49618	6.83122	1	1	1	0	1	1	0	0	0	5	1	1	1	0	1	0	1	5	1	CHEF
chrX	52745386	52746365	chrX	133306907	133308907	3046444	9.47044	4.98206	1	1	1	0	0	0	0	0	0	3	0	0	0	0	0	0	0	0	1	CHEF
chr13	48546346	48546746	chr9	96927473	96929473	1011760	9.46677	4.1991	0	0	0	0	0	1	0	0	0	1	0	0	0	0	1	1	1	3	1	CHEF
chr9	121314055	121314542	chr3	42066284	42068284	3046068	9.41997	5.37169	0	1	1	0	1	0	0	0	0	3	0	1	1	0	1	0	0	3	1	CHEF
chr15	97376178	97376833	chr12	47615183	47617183	4016157	9.41587	6.1795	1	1	1	0	0	0	0	0	1	4	0	0	0	0	0	0	0	0	1	CHEF
chr13	63272168	63273278	chr9	97809683	97811683	7012144	9.40554	1.20439	1	1	1	1	1	1	0	0	1	7	0	0	0	0	0	0	1	1	1	CHEF
chr3	90446373	90446892	chr1	153669864	153671864	4027820	9.39255	3.14747	1	1	1	0	1	0	0	0	0	4	0	0	0	0	0	0	0	0	1	CHEF
chr2	29820325	29820892	chr9	131126418	131128418	7023574	9.38678	2.69934	1	1	1	1	1	1	0	0	1	7	1	1	1	1	0	0	1	5	1	CHEF
chr9	88522345	88523384	chr6	86387320	86389320	3045290	9.36278	5.82674	0	1	1	0	0	1	0	0	0	3	0	0	0	0	0	0	1	1	1	CHEF
chr9	58455760	58456261	chr15	74078054	74080054	5044623	9.35197	3.95814	1	1	1	1	0	1	0	0	0	5	1	1	1	0	1	0	1	5	1	CHEF
chr2	116975186	116976089	chr15	38364032	38366032	3024960	9.32827	2.00658	0	0	1	0	0	1	0	0	1	3	1	0	1	1	1	0	1	5	1	CHEF
chr10	127339847	127340256	chr12	57854536	57856536	1005326	9.3239	6.17587	0	0	0	0	0	1	0	0	0	1	0	0	0	0	1	0	0	1	1	CHEF
chr7	30588209	30589342	chr19	36207877	36209877	3038596	9.32177	5.93443	0	1	1	0	0	1	0	0	0	3	0	0	0	0	1	0	0	1	1	CHEF
chr16	22438316	22438716	chr3	185824586	185826586	1017068	9.31871	1.89517	0	0	1	0	0	0	0	0	0	1	0	0	1	0	0	1	0	2	1	CHEF
chr5	134339911	134340567	chr7	74041056	74043056	3034709	9.30103	2.99376	0	1	1	1	0	0	0	0	0	3	1	1	0	1	1	0	1	5	1	CHEF
chr4	134011672	134012235	chr1	26744550	26746550	3031152	9.28814	5.43698	0	1	0	0	0	1	0	0	1	3	1	0	1	0	1	0	1	4	1	CHEF
chr1	119048953	119049487	chr2	121497124	121499124	5001525	9.22306	5.38775	1	1	1	0	0	0	1	0	1	5	0	0	1	0	1	0	1	3	1	CHEF
chr14	61648286	61649132	chr13	50655045	50657045	2013819	9.18653	3.36982	0	0	1	0	0	1	0	0	0	2	0	0	0	1	1	0	0	2	1	CHEF
chr3	34653572	34654266	chr3	181432786	181434786	4027130	9.1606	5.90458	1	1	1	0	0	0	0	0	1	4	1	1	1	0	1	0	1	5	1	CHEF
chr10	37136923	37138057	chr6	114179067	114181067	3003461	9.15289	3.44947	0	0	1	0	0	1	0	0	1	3	0	0	0	1	0	0	1	2	1	CHEF
chr10	56378521	56378924	chr6	121757296	121759296	1003743	9.13929	7.17366	0	0	0	0	0	1	0	0	0	1	0	0	0	0	0	0	1	1	1	CHEF
chr4	123623534	123623956	chr1	39607795	39609795	3030552	9.0738	2.62092	1	1	1	0	0	0	0	0	0	3	0	0	0	0	1	0	0	1	1	CHEF
chr6	86472096	86472590	chr2	70368927	70370927	3036537	9.05296	4.92863	1	0	1	0	0	1	0	0	0	3	0	0	0	1	1	1	0	3	1	CHEF
chr9	102689876	102690872	chr3	134124452	134126452	6045495	9.03915	2.72412	1	1	1	1	0	1	0	0	1	6	1	0	1	0	1	0	1	4	1	CHEF
chr12	100187348	100187763	chr14	90848607	90850607	2010550	9.00219	4.57324	0	0	1	0	0	1	0	0	0	2	0	0	0	1	1	0	1	3	1	CHEF
chr7	110164138	110164538	chr11	9633942	9635942	1039961	8.99257	3.81859	0	1	0	0	0	0	0	0	0	1	0	1	1	0	1	0	0	3	1	CHEF
chr11	62602570	62603026	chr17	16341387	16343387	2006692	8.91739	5.04434	0	0	1	0	0	1	0	0	0	2	0	1	1	0	1	0	1	4	1	CHEF
chr17	79342539	79343397	chr2	37880687	37882687	5019896	8.8558	2.10156	1	1	1	1	0	0	0	0	1	5	1	0	1	0	1	0	1	4	1	CHEF
chr13	54686303	54686703	chr5	175961788	175963788	1011930	8.83111	4.5338	0	0	0	1	0	0	0	0	0	1	0	0	0	1	0	0	1	2	1	CHEF
chr7	16047641	16048072	chr19	48111454	48113454	1037987	8.82634	8.0478	0	0	0	0	0	1	0	0	0	1	0	0	0	1	0	0	0	1	1	CHEF
chr1	59448407	59449282	chr2	202859763	202861763	4000698	8.79819	3.91126	1	1	1	0	0	0	0	0	1	4	0	1	0	0	0	0	1	2	1	CHEF
chr1	136695852	136696611	chr1	200305200	200307200	6001980	8.79533	2.82084	1	0	1	1	1	1	0	0	1	6	0	0	0	0	1	0	0	1	1	CHEF
chr15	102243140	102243605	chr12	53609977	53611977	3016446	8.77829	3.57226	1	1	0	0	1	0	0	0	0	3	1	1	1	0	1	0	1	5	1	CHEF
chr17	70834407	70834810	chr18	3466096	3468096	2019784	8.75643	2.50438	0	0	1	0	0	1	0	0	0	2	0	0	1	0	0	0	1	2	1	CHEF
chr1	64732653	64733110	chr2	208628669	208630669	5000788	8.72699	2.51759	1	1	1	1	0	0	0	1	0	5	0	0	0	0	0	0	1	1	1	CHEF
chr19	55742357	55743319	chr10	114710035	114712035	2022916	8.68574	10.5198	0	0	0	0	0	1	0	0	1	2	0	0	0	0	1	0	0	1	1	CHEF
chr8	84650051	84650662	chr19	13277761	13279761	9042312	8.67017	5.13241	1	1	1	1	1	1	1	1	1	9	0	0	0	0	0	0	0	0	1	CHEF
chr2	152396159	152396600	chr20	306889	308889	2025657	8.65645	4.72663	0	0	1	0	1	0	0	0	0	2	0	0	0	0	0	0	1	1	1	CHEF
chr1	63112815	63113787	chr2	206948547	206950547	2000751	8.63002	10.141	0	0	0	0	0	1	0	0	1	2	0	0	0	0	1	0	0	1	1	CHEF
chr12	86888038	86888438	chr14	77498300	77500300	1010427	8.62416	5.28938	0	0	0	0	1	0	0	0	0	1	0	0	1	1	0	0	0	2	1	CHEF
chr7	19270370	19270770	chr19	46010995	46012995	1038102	8.60467	7.13933	0	0	0	1	0	0	0	0	0	1	0	0	0	0	0	0	0	0	1	CHEF
chr11	3292730	3293341	chr22	31738193	31740193	6005455	8.60419	3.5426	1	1	1	0	1	1	0	0	0	5	0	0	0	0	1	0	0	1	1	CHEF
chr19	17137569	17138568	chr9	79304238	79306238	6022081	8.60164	0.679851	1	1	1	1	0	1	1	0	0	6	1	1	1	0	1	0	1	5	1	CHEF
chr10	66920273	66920842	chr10	65472311	65474311	4004006	8.59963	5.74166	1	1	1	1	0	0	0	0	0	4	1	1	1	0	1	0	1	5	1	CHEF
chr12	86888666	86889066	chr14	77498953	77500953	1010428	8.53908	5.4685	0	0	0	0	0	0	0	0	1	1	0	0	1	1	0	0	0	2	1	CHEF
chr12	99412386	99412850	chr14	89906938	89908938	4010527	8.5352	5.77744	1	1	1	0	0	0	0	0	1	4	1	1	1	0	1	0	1	5	1	CHEF
chr2	20653086	20653615	chr10	24657904	24659904	3023306	8.52854	2.45037	1	1	1	0	0	0	0	0	0	3	1	1	1	0	1	0	1	5	1	CHEF
chr13	23586358	23586788	chr6	26182531	26184531	3011288	8.51323	4.9192	1	1	1	0	0	0	0	0	0	3	1	0	1	1	1	0	0	4	1	CHEF
chr8	48554876	48556251	chr4	183368841	183370841	3041648	8.49698	3.08704	0	0	1	0	1	1	0	0	0	3	0	0	0	1	1	0	1	3	1	CHEF
chr2	180727511	180728180	chr20	61586019	61588019	8026669	8.49646	2.6117	1	1	1	1	1	1	1	0	1	8	0	0	0	0	0	0	0	0	1	CHEF
chr8	65046544	65047075	chr4	165787161	165789161	3041772	8.49379	3.97832	0	1	0	0	1	1	0	0	0	3	1	1	1	0	1	0	1	5	1	CHEF
chr16	30206032	30206497	chr3	194003791	194005791	4017190	8.47518	2.75559	1	1	1	1	0	0	0	0	0	4	0	1	1	0	1	0	1	4	1	CHEF
chr6	72677494	72678008	chr2	85482145	85484145	3036326	8.46565	4.37713	1	1	1	0	0	0	0	0	0	3	0	0	1	0	1	0	0	2	1	CHEF
chrX	85077589	85078126	chrX	31251133	31253133	3046616	8.4527	1.35628	1	1	1	0	0	0	0	0	0	3	1	1	1	0	0	0	1	4	1	CHEF
chr5	113873022	113873681	chr12	109084765	109086765	2033890	8.43955	2.61784	0	1	1	0	0	0	0	0	0	2	1	0	1	0	0	0	0	2	1	CHEF
chr14	52257328	52257913	chr14	21923142	21925142	2013609	8.42179	3.49505	0	0	1	0	0	1	0	0	0	2	0	1	0	1	0	0	0	2	1	CHEF
chr16	28928746	28929348	chr3	192633951	192635951	4017147	8.40682	5.70831	1	0	1	0	0	1	0	0	1	4	0	0	1	0	0	0	1	2	1	CHEF
chr12	39998569	39998969	chr7	12767227	12769227	1009640	8.33627	2.6404	0	0	0	0	0	0	0	0	1	1	0	1	0	0	1	0	0	2	1	CHEF
chr11	63270879	63271530	chr17	14989040	14991040	5006721	8.32859	1.36651	1	1	1	1	0	0	0	0	1	5	1	0	0	0	0	0	0	1	1	CHEF
chr3	87150062	87150462	chr1	157989063	157991063	1027638	8.32856	5.28228	0	0	0	0	0	0	0	0	1	1	0	0	1	0	0	0	0	1	1	CHEF
chr11	95858667	95859067	chr17	47269280	47271280	1007841	8.32391	3.0926	0	0	1	0	0	0	0	0	0	1	0	0	0	0	1	1	0	2	1	CHEF
chr6	93912453	93913115	chr3	65581942	65583942	3036743	8.2874	6.16873	1	1	1	0	0	0	0	0	0	3	0	1	1	0	1	0	1	4	1	CHEF
chr3	149219806	149220332	chr1	82012307	82014307	3028746	8.25792	5.23899	1	1	1	0	0	0	0	0	0	3	1	1	1	0	1	0	1	5	1	CHEF
chr15	53310969	53311412	chr8	119085693	119087693	2015068	8.24623	4.57206	0	0	1	0	0	1	0	0	0	2	1	0	1	0	1	0	1	4	1	CHEF
chr4	41136407	41136807	chr9	33817323	33819323	1029232	8.24475	5.76443	0	0	0	0	0	0	0	0	1	1	0	0	0	1	0	0	1	2	1	CHEF
chr4	126465770	126466267	chr1	36350782	36352782	4030724	8.24114	3.70605	1	1	1	0	1	0	0	0	0	4	1	1	1	0	1	0	1	5	1	CHEF
chr11	22610344	22610752	chr2	62692526	62694526	2005861	8.22317	3.45051	0	0	0	1	0	0	0	0	1	2	1	1	1	0	0	0	1	4	1	CHEF
chr11	86586261	86586661	chr17	57914832	57916832	1007519	8.21078	6.92773	0	0	0	0	0	0	0	0	1	1	0	0	1	0	1	0	0	2	1	CHEF
chr11	8569183	8569838	chr7	47509522	47511522	7005653	8.18122	1.9388	1	1	1	1	1	0	0	1	1	7	0	1	1	0	1	0	1	4	1	CHEF
chr1	64733456	64733915	chr2	208629588	208631588	4000789	8.17971	4.48439	1	1	1	0	1	0	0	0	0	4	1	0	1	0	0	0	0	2	1	CHEF
chr13	23562198	23562598	chr6	26224377	26226377	1011284	8.17499	4.29255	0	0	1	0	0	0	0	0	0	1	0	0	1	0	1	0	1	3	1	CHEF
chr7	112688371	112689061	chr11	12705484	12707484	6040009	8.17474	0.978667	1	1	1	1	0	0	1	1	0	6	0	0	1	1	0	0	1	3	1	CHEF
chr15	77798697	77799097	chr22	36724612	36726612	1015500	8.16937	3.47517	0	0	0	0	0	0	0	0	1	1	1	0	1	1	1	0	0	4	1	CHEF
chr2	115723346	115723857	chr15	37044450	37046450	4024942	8.13753	3.2569	1	1	1	0	0	0	0	0	1	4	1	0	1	0	1	0	1	4	1	CHEF
chr10	12614448	12614857	chr6	144903578	144905578	3003086	8.12747	2.61784	1	1	1	0	0	0	0	0	0	3	0	0	0	0	1	0	0	1	1	CHEF
chr4	156193198	156193598	chr1	959014	961014	1032203	8.12388	3.74129	1	0	0	0	0	0	0	0	0	1	0	0	0	0	1	1	0	2	1	CHEF
chr15	52013009	52013519	chr12	48172527	48174527	5015058	8.09736	0.920464	0	1	1	1	1	1	0	0	0	5	1	0	0	0	0	0	0	1	1	CHEF
chr5	13982375	13983056	chr7	83323371	83325371	4032283	8.06376	2.1665	1	1	1	0	0	0	1	0	0	4	1	1	1	0	1	0	1	5	1	CHEF
chr13	112770415	112771102	chr5	54866212	54868212	7012868	7.99758	7.06908	1	1	1	1	1	1	0	0	1	7	0	0	0	0	1	0	0	1	1	CHEF
chr5	115489360	115490626	chr12	120729428	120731428	2034031	7.9425	4.71766	0	1	1	0	0	0	0	0	0	2	0	0	0	1	1	0	1	3	1	CHEF
chr11	98964431	98965078	chr17	38501885	38503885	4008135	7.94018	2.10459	1	1	0	1	0	0	0	0	1	4	0	0	0	0	0	0	1	1	1	CHEF
chr2	71867443	71867949	chr2	173415950	173417950	4024361	7.93058	2.45345	0	1	1	1	0	0	0	0	1	4	1	0	0	0	0	0	1	2	1	CHEF
chr10	21101828	21102621	chr6	135571153	135573153	4003247	7.89735	5.01943	1	1	1	1	0	0	0	0	0	4	1	1	1	0	1	0	1	5	1	CHEF
chr19	55743594	55743994	chr10	114711039	114713039	1022917	7.88276	9.31063	0	0	0	0	0	1	0	0	0	1	0	0	0	0	1	0	0	1	1	CHEF
chr1	62783457	62783941	chr2	206627793	206629793	4000747	7.83108	2.22689	1	1	1	0	0	1	0	0	0	4	1	1	1	0	1	0	1	5	1	CHEF
chr1	136953542	136954110	chr1	200003062	200005062	7001990	7.82056	2.66533	1	1	1	0	1	1	1	0	0	6	0	0	0	0	0	0	1	1	1	CHEF
chr10	66921005	66921405	chr10	65471619	65473619	1004007	7.81469	4.90054	0	0	0	1	0	0	0	0	0	1	1	1	1	0	1	0	1	5	1	CHEF
chr11	95859374	95859878	chr17	47268587	47270587	2007842	7.80123	2.51695	0	0	1	0	0	1	0	0	0	2	0	0	0	0	1	1	0	2	1	CHEF
chr7	127477840	127478240	chr16	30668601	30670601	1040372	7.78618	2.65543	0	0	1	0	0	0	0	0	0	1	0	0	0	0	1	0	1	2	1	CHEF
chr9	82974105	82974505	chr6	79785799	79787799	1045226	7.78308	5.08673	0	0	1	0	0	0	0	0	0	1	1	0	0	0	0	0	1	2	1	CHEF
chr1	171477868	171478601	chr1	160950580	160952580	4002461	7.78264	4.09786	0	0	1	0	1	1	0	0	1	4	1	1	0	0	1	0	1	4	1	CHEF
chr13	44722070	44722617	chr6	15237709	15239709	7011674	7.77929	4.28762	1	1	1	1	1	1	1	0	0	7	0	0	0	0	0	0	0	0	1	CHEF
chr11	117975352	117975883	chr17	76360861	76362861	7008994	7.76302	5.97881	1	1	1	1	1	0	1	1	0	7	0	1	1	0	1	0	1	4	1	CHEF
chrX	58041833	58042362	chrX	136659205	136661205	3046487	7.75535	3.97326	1	1	1	0	0	0	0	0	0	3	0	0	0	0	0	0	0	0	1	CHEF
chr2	165898256	165899296	chr20	45996815	45998815	3026128	7.75186	7.09026	1	1	1	0	0	0	0	0	0	3	1	1	1	0	1	0	1	5	1	CHEF
chr15	8697882	8698391	chr5	36618451	36620451	3014630	7.75066	3.95603	1	1	0	0	0	0	0	0	1	3	0	0	1	0	1	0	0	2	1	CHEF
chr13	94706532	94707005	chr5	77142918	77144918	6012484	7.73571	0.835994	1	1	1	0	1	0	1	0	1	6	1	1	1	1	1	0	1	6	1	CHEF
chr4	137387961	137388603	chr1	22351147	22353147	3031393	7.68289	5.01125	0	0	1	0	1	1	0	0	0	3	0	0	0	0	1	0	1	2	1	CHEF
chr14	105859098	105860264	chr13	80868710	80870710	7014364	7.66374	2.9865	1	1	1	1	1	1	0	1	0	7	0	0	0	0	0	0	0	0	1	CHEF
chr4	126466500	126466900	chr1	36350057	36352057	1030725	7.63005	2.75314	0	0	0	0	0	0	0	0	1	1	1	1	1	0	1	0	1	5	1	CHEF
chr10	80151746	80152146	chr19	1251127	1253127	1004379	7.59365	7.68339	0	0	0	1	0	0	0	0	0	1	0	0	0	0	0	0	0	0	1	CHEF
chr3	87910495	87910895	chr1	156716020	156718020	1027666	7.57873	6.54706	0	0	1	0	0	0	0	0	0	1	0	0	0	0	0	1	0	1	1	CHEF
chr10	12869065	12869708	chr6	144605208	144607208	2003094	7.57027	3.74941	0	0	1	0	0	1	0	0	0	2	0	0	0	0	0	1	1	2	1	CHEF
chr4	129810710	129811805	chr1	32408948	32410948	5030880	7.5534	3.27441	0	0	1	1	1	1	0	0	1	5	0	0	1	0	0	1	0	2	1	CHEF
chr1	62767505	62767989	chr2	206612474	206614474	6000745	7.51953	2.93048	1	1	1	1	1	0	1	0	0	6	0	0	1	0	0	0	0	1	1	CHEF
chr8	84198320	84198872	chr19	13956555	13958555	3042280	7.51024	5.53306	0	0	1	1	0	1	0	0	0	3	0	0	0	0	0	0	1	1	1	CHEF
chr7	49347140	49347607	chr11	19837907	19839907	3039068	7.48478	7.36793	1	1	1	0	0	0	0	0	0	3	1	0	1	0	1	0	1	4	1	CHEF
chr3	51276003	51276797	chr4	140003429	140005429	2027262	7.43009	4.19669	0	0	1	0	0	1	0	0	0	2	0	0	0	0	1	0	1	2	1	CHEF
chr9	32095360	32095978	chr11	129089909	129091909	5043986	7.42029	1.58839	1	1	1	1	0	0	1	0	0	5	1	0	0	0	0	0	0	1	1	CHEF
chr5	137510056	137511158	chr7	100290767	100292767	2034903	7.41447	8.00783	0	0	1	0	0	1	0	0	0	2	0	0	0	0	0	0	0	0	1	CHEF
chr12	12927104	12927537	chr2	16097723	16099723	3009368	7.39774	5.45618	1	1	1	0	0	0	0	0	0	3	1	0	1	0	1	0	1	4	1	CHEF
chr2	128265052	128265803	chr2	112044706	112046706	2025231	7.38695	1.16626	0	1	0	1	0	0	0	0	0	2	0	0	0	0	1	0	1	2	1	CHEF
chr17	88256100	88256615	chr2	48337952	48339952	3020153	7.36072	3.94712	0	0	1	0	1	1	0	0	0	3	0	0	0	0	1	1	0	2	1	CHEF
chr15	37233860	37234510	chr8	102504810	102506810	2014934	7.35893	4.08228	0	0	1	0	0	1	0	0	0	2	0	0	0	0	1	1	0	2	1	CHEF
chr7	49347855	49348314	chr11	19838702	19840702	3039069	7.35195	7.43101	1	1	1	0	0	0	0	0	0	3	1	0	1	0	1	0	1	4	1	CHEF
chr11	101696149	101696625	chr17	41515613	41517613	2008277	7.33779	1.37257	1	0	1	0	0	0	0	0	0	2	0	0	1	0	0	0	0	1	1	CHEF
chr2	39007843	39008315	chr9	127630518	127632518	2023988	7.32966	6.39764	0	0	1	0	0	1	0	0	0	2	0	0	0	1	0	0	0	1	1	CHEF
chr10	21988236	21988916	chr6	134503290	134505290	5003287	7.29725	2.84547	1	1	1	1	0	0	1	0	0	5	1	0	0	0	1	0	0	2	1	CHEF
chr14	55085684	55086377	chr14	24013451	24015451	7013668	7.29558	5.74804	1	1	1	1	1	1	0	0	1	7	0	0	0	0	0	0	0	0	1	CHEF
chr6	39400278	39400749	chr7	140154700	140156700	3035869	7.27797	4.17034	1	1	0	0	1	0	0	0	0	3	1	1	1	0	1	0	0	4	1	CHEF
chr16	43800192	43801068	chr3	113872237	113874237	4017509	7.24059	5.31355	1	1	1	1	0	0	0	0	0	4	1	1	1	0	1	0	1	5	1	CHEF
chr5	147155422	147155866	chr13	28318172	28320172	3035263	7.21545	1.8648	1	1	1	0	0	0	0	0	0	3	1	0	0	0	0	0	0	1	1	CHEF
chr8	25544915	25545417	chr8	38297210	38299210	3041280	7.19524	8.34996	1	1	1	0	0	0	0	0	0	3	1	1	1	0	1	0	1	5	1	CHEF
chr12	52505366	52505766	chr14	32546860	32548860	1009744	7.18308	2.33266	0	0	0	0	0	0	0	0	1	1	0	0	1	0	1	0	1	3	1	CHEF
chr8	33917020	33917420	chr8	30253252	30255252	1041408	7.17678	7.19783	0	0	0	0	0	0	0	0	1	1	0	0	0	0	1	0	0	1	1	CHEF
chr4	44234017	44234432	chr9	36486975	36488975	2029327	7.17657	6.49991	0	0	1	0	0	1	0	0	0	2	0	0	0	0	0	1	0	1	1	CHEF
chr2	172613686	172614597	chr20	55310556	55312556	4026482	7.16446	2.32403	0	1	1	1	0	0	0	0	1	4	1	1	1	0	1	0	1	5	1	CHEF
chr4	99641753	99642317	chr1	63769968	63771968	4029979	7.15681	6.5267	1	1	1	0	0	0	1	0	0	4	1	1	1	0	1	0	1	5	1	CHEF
chrX	12839945	12840624	chrX	40703869	40705869	5046262	7.14752	6.60868	1	1	1	0	0	1	0	0	1	5	1	0	1	0	1	0	0	3	1	CHEF
chr4	134016307	134016707	chr1	26738567	26740567	1031153	7.11261	6.67974	0	0	1	0	0	0	0	0	0	1	0	0	1	0	1	0	0	2	1	CHEF
chr6	140336933	140337360	chr12	19179015	19181015	2037592	7.10224	3.11677	1	1	0	0	0	0	0	0	0	2	0	0	1	0	0	0	0	1	1	CHEF
chr14	55078002	55078402	chr14	24006521	24008521	1013666	7.09358	9.48697	1	0	0	0	0	0	0	0	0	1	1	0	1	0	0	0	1	3	1	CHEF
chr9	110960187	110961048	chr3	46585755	46587755	3045811	7.07696	4.00121	1	0	0	1	1	0	0	0	0	3	1	1	1	0	0	0	1	4	1	CHEF
chr7	4124172	4124620	chr19	54931226	54933226	3037832	7.06562	4.00167	1	1	0	0	1	0	0	0	0	3	1	0	0	0	1	0	0	2	1	CHEF
chr18	65565653	65566119	chr18	56513872	56515872	3021172	7.04804	7.945	1	0	1	0	1	0	0	0	0	3	1	1	1	1	1	1	1	7	1	CHEF
chr8	25543307	25543900	chr8	38299018	38301018	3041279	7.04776	7.1195	1	0	1	0	0	1	0	0	0	3	0	0	1	0	1	0	1	3	1	CHEF
chr19	20923689	20924583	chr9	75294640	75296640	4022107	7.04391	7.5395	1	1	1	1	0	0	0	0	0	4	1	1	1	0	1	0	1	5	1	CHEF
chr11	102582275	102583119	chr17	42619900	42621900	2008357	7.02763	3.53804	0	0	0	1	0	0	0	0	1	2	0	0	1	0	1	0	1	3	1	CHEF
chr2	58625814	58626678	chr2	158788133	158790133	4024114	6.99137	1.84371	1	1	1	1	0	0	0	0	0	4	1	1	1	0	1	0	1	5	1	CHEF
chr11	96017805	96018306	chr17	47049229	47051229	3007852	6.97067	2.36898	0	1	1	0	0	0	0	1	0	3	0	0	0	0	0	0	1	1	1	CHEF
chrX	99556813	99557248	chrX	68483152	68485152	4046688	6.96703	1.61472	1	1	1	0	0	0	1	0	0	4	1	1	1	1	1	0	1	6	1	CHEF
chr19	6952085	6952486	chr11	64035931	64037931	1021873	6.95502	4.08544	0	0	0	0	0	1	0	0	0	1	1	0	0	0	0	1	0	2	1	CHEF
chr13	111808112	111808523	chr5	56111176	56113176	1012835	6.95019	3.80131	0	0	0	0	0	1	0	0	0	1	0	0	1	0	1	0	1	3	1	CHEF
chr14	40956198	40956600	chr10	82223650	82225650	2013472	6.9412	4.0625	0	1	0	0	1	0	0	0	0	2	0	0	1	0	0	0	0	1	1	CHEF
chrX	12153115	12154152	chrX	40027999	40029999	3046246	6.91648	4.01985	1	1	1	0	0	0	0	0	0	3	1	1	1	0	1	0	1	5	1	CHEF
chr3	149219226	149219626	chr1	82013061	82015061	1028745	6.91104	4.17653	1	0	0	0	0	0	0	0	0	1	1	1	1	0	0	0	1	4	1	CHEF
chr19	44284153	44285013	chr10	102132522	102134522	3022605	6.9097	5.43722	0	0	1	0	0	1	0	0	1	3	0	0	1	0	1	0	0	2	1	CHEF
chr2	52959025	52959425	chr2	153308536	153310536	1024082	6.88995	3.76799	0	0	0	0	0	0	0	0	1	1	0	1	1	0	1	0	1	4	1	CHEF
chr3	89225371	89226322	chr1	155165391	155167391	3027742	6.87549	5.62759	1	1	0	0	0	0	0	0	1	3	1	1	0	0	0	0	1	3	1	CHEF
chr16	35587918	35588389	chr3	122704740	122706740	4017392	6.86519	3.40479	1	1	0	1	1	0	0	0	0	4	1	0	1	0	1	0	1	4	1	CHEF
chr17	5189635	5190294	chr6	157342134	157344134	3018089	6.84871	4.4072	0	0	1	0	0	1	0	0	1	3	0	0	0	1	1	0	0	2	1	CHEF
chr9	78359553	78360121	chr6	74058792	74060792	5045184	6.84491	5.83327	1	1	1	1	0	0	1	0	0	5	1	1	1	0	1	0	1	5	1	CHEF
chr2	76805145	76805627	chr2	179491440	179493440	3024504	6.84034	1.8881	1	1	1	0	0	0	0	0	0	3	0	0	0	0	1	0	1	2	1	CHEF
chr2	59697864	59698758	chr2	159920330	159922330	2024143	6.82918	1.49915	0	1	1	0	0	0	0	0	0	2	0	0	1	0	0	0	0	1	1	CHEF
chr15	25773555	25774053	chr5	16712929	16714929	3014772	6.80424	2.51578	1	1	1	0	0	0	0	0	0	3	0	0	1	0	0	0	0	1	1	CHEF
chr3	65974636	65975051	chr3	156891830	156893830	2027426	6.79235	3.72936	0	0	1	0	0	1	0	0	0	2	0	0	0	1	1	1	0	3	1	CHEF
chr8	69121574	69122075	chr8	20091339	20093339	2041824	6.77404	1.43173	1	0	1	0	0	0	0	0	0	2	1	0	1	0	0	0	1	3	1	CHEF
chr8	69920333	69920733	chr19	19599156	19601156	1041853	6.77305	4.10045	0	0	0	0	0	0	0	0	1	1	1	0	1	1	0	0	0	3	1	CHEF
chr2	170193335	170193810	chr20	52294286	52296286	3026397	6.7631	2.18929	1	1	1	0	0	0	0	0	0	3	0	0	1	0	0	0	0	1	1	CHEF
chr11	102579313	102579715	chr17	42616263	42618263	2008355	6.76101	1.90951	1	0	0	1	0	0	0	0	0	2	1	1	1	1	1	1	1	7	1	CHEF
chr5	92112174	92113049	chr4	76628889	76630889	7033367	6.75156	5.44473	1	1	1	1	1	1	1	0	0	7	1	1	1	0	0	0	0	3	1	CHEF
chr11	117976314	117976740	chr17	76362017	76364017	3008995	6.74806	5.18203	1	1	1	0	0	0	0	0	0	3	0	0	0	0	0	0	0	0	1	CHEF
chr3	133524017	133524417	chr4	106101449	106103449	1028552	6.74471	0.800775	0	0	0	1	0	0	0	0	0	1	0	1	1	0	1	0	1	4	1	CHEF
chr9	65826969	65827967	chr15	64752047	64754047	2044914	6.74469	5.07766	0	0	1	0	0	1	0	0	0	2	1	0	0	1	0	0	0	2	1	CHEF
chr8	23561961	23562962	chr8	40934524	40936524	3041218	6.74416	6.03777	1	1	1	0	0	0	0	0	0	3	1	1	1	0	1	0	1	5	1	CHEF
chr7	16364801	16365587	chr19	47659879	47661879	4038016	6.69877	6.02712	1	1	1	1	0	0	0	0	0	4	1	1	1	0	1	0	1	5	1	CHEF
chr4	123662880	123663369	chr1	39571787	39573787	2030563	6.68394	3.93039	0	1	0	0	0	0	0	0	1	2	0	0	0	0	1	0	0	1	1	CHEF
chr2	70278636	70279160	chr2	171291692	171293692	5024292	6.68222	2.02878	1	1	1	1	0	0	0	1	0	5	0	0	1	0	1	0	1	3	1	CHEF
chr6	52106114	52106543	chr7	27034401	27036401	3036062	6.68092	0.783227	1	1	1	0	0	0	0	0	0	3	1	0	1	0	1	0	1	4	1	CHEF
chrX	52746814	52747329	chrX	133308129	133310129	4046445	6.67249	4.11075	1	1	1	1	0	0	0	0	0	4	0	0	1	0	1	0	0	2	1	CHEF
chr1	34006984	34007396	chr6	56714341	56716341	2000285	6.67044	2.11609	1	1	0	0	0	0	0	0	0	2	0	0	0	0	1	0	1	2	1	CHEF
chr17	29467419	29467893	chr6	37108505	37110505	4018760	6.66344	8.61275	1	1	1	0	0	0	0	0	1	4	1	1	1	0	1	0	1	5	1	CHEF
chr14	99324487	99325281	chr13	73664022	73666022	4014279	6.6476	2.00885	1	1	1	1	0	0	0	0	0	4	0	0	0	0	0	0	1	1	1	CHEF
chr7	144864117	144864934	chr11	69585432	69587432	6040857	6.6456	3.90317	1	1	1	1	1	0	0	0	0	5	0	0	1	0	1	0	1	3	1	CHEF
chr12	86823872	86824617	chr14	77412920	77414920	4010410	6.63873	4.18165	1	1	1	0	0	1	0	0	0	4	0	0	0	0	1	0	0	1	1	CHEF
chr5	63932628	63933098	chr4	37643330	37645330	3032977	6.63651	2.19952	1	1	1	0	0	0	0	0	0	3	0	0	0	0	1	0	1	2	1	CHEF
chr10	120521900	120522300	chr12	66174278	66176278	1005177	6.62454	1.9863	0	1	0	0	0	0	0	0	0	1	0	1	1	0	0	0	1	3	1	CHEF
chr15	103518035	103518435	chr12	54957791	54959791	1016544	6.61761	2.59571	1	0	0	0	0	0	0	0	0	1	1	1	1	0	1	0	1	5	1	CHEF
chr2	29835499	29835980	chr9	131144598	131146598	4023577	6.61714	3.33196	1	1	1	0	0	1	0	0	0	4	1	1	1	0	1	0	1	5	1	CHEF
chr14	27066186	27066668	chr3	57164093	57166093	2013288	6.61026	6.07559	0	1	1	0	0	0	0	0	0	2	0	1	1	0	1	0	1	4	1	CHEF
chr1	135198948	135199674	chr1	202053527	202055527	6001896	6.5915	4.58347	0	1	1	1	1	1	0	0	1	6	0	0	0	0	1	0	0	1	1	CHEF
chr2	152820347	152820799	chr20	30299611	30301611	3025683	6.56079	3.72678	0	1	0	1	0	1	0	0	0	3	0	1	1	0	1	0	1	4	1	CHEF
chr15	62092543	62093237	chr8	128878541	128880541	7015193	6.51323	4.18905	1	1	1	1	0	1	1	0	1	7	1	1	1	0	1	0	1	5	1	CHEF
chr13	28810659	28811059	chr6	21740658	21742658	1011345	6.5102	6.47504	1	0	0	0	0	0	0	0	0	1	1	0	1	0	1	0	0	3	1	CHEF
chr17	70772530	70773003	chr18	3552831	3554831	3019777	6.47693	3.61463	1	1	1	0	0	0	0	0	0	3	0	0	1	0	1	0	1	3	1	CHEF
chr2	152707570	152708091	chr20	30160262	30162262	4025671	6.45477	5.26118	0	0	1	1	0	1	0	0	1	4	0	0	0	1	1	1	0	3	1	CHEF
chr2	71866533	71867000	chr2	173415215	173417215	5024360	6.45139	2.87143	0	1	1	1	0	0	1	0	1	5	1	0	0	0	0	0	1	2	1	CHEF
chr7	112841777	112842298	chr11	12885397	12887397	3040015	6.44638	7.98987	1	1	0	0	0	0	0	0	1	3	1	1	1	1	1	0	1	6	1	CHEF
chr4	135581121	135581982	chr1	24634132	24636132	4031278	6.43668	3.63629	0	1	0	1	0	1	0	0	1	4	1	0	1	1	0	0	0	3	1	CHEF
chr11	55323715	55324216	chr5	150957027	150959027	4006450	6.43357	0.851644	1	1	1	0	0	1	0	0	0	4	0	0	0	0	0	0	1	1	1	CHEF
chr12	25098714	25099134	chr2	8818007	8820007	2009498	6.42148	2.18827	0	0	1	0	0	1	0	0	0	2	0	0	1	0	1	1	1	4	1	CHEF
chr2	115724182	115724582	chr15	37045297	37047297	1024943	6.39893	2.63647	1	0	0	0	0	0	0	0	0	1	1	0	0	0	0	0	1	2	1	CHEF
chr6	37658047	37658731	chr7	137927446	137929446	4035813	6.38799	7.93337	1	1	1	1	0	0	0	0	0	4	1	1	1	0	1	0	1	5	1	CHEF
chr13	51920825	51921555	chr9	92292427	92294427	4011853	6.38388	4.65744	1	1	1	1	0	0	0	0	0	4	1	1	1	0	1	0	1	5	1	CHEF
chr4	123667206	123667649	chr1	39567645	39569645	2030566	6.36689	3.8529	1	1	0	0	0	0	0	0	0	2	1	1	1	0	1	0	1	5	1	CHEF
chr14	73238346	73238790	chr13	48985595	48987595	3014035	6.36491	2.0052	1	1	1	0	0	0	0	0	0	3	0	0	0	0	1	0	0	1	1	CHEF
chr1	84871975	84872495	chr2	230816138	230818138	4001135	6.35276	5.1692	1	1	1	1	0	0	0	0	0	4	0	0	0	0	1	0	1	2	1	CHEF
chr6	49217792	49218342	chr7	23512954	23514954	3035994	6.35235	7.43421	0	0	1	0	1	1	0	0	0	3	0	0	0	1	1	0	0	2	1	CHEF
chr6	51270560	51271438	chr7	25989822	25991822	3036029	6.35007	4.18131	0	0	1	0	0	1	0	0	1	3	0	0	0	1	0	0	1	2	1	CHEF
chr17	84351259	84351747	chr2	43671405	43673405	6020019	6.31166	1.96463	1	1	1	1	1	0	1	0	0	6	0	0	1	0	1	0	0	2	1	CHEF
chr11	20541600	20542826	chr2	64978152	64980152	4005820	6.29046	2.03217	1	1	0	0	1	1	0	0	0	4	0	0	0	0	1	0	0	1	1	CHEF
chr9	64198910	64199310	chr15	66765186	66767186	1044839	6.28843	5.1557	0	0	0	1	0	0	0	0	0	1	0	0	1	0	0	0	1	2	1	CHEF
chr1	132197688	132198125	chr1	205416739	205418739	2001725	6.28298	2.59261	1	1	0	0	0	0	0	0	0	2	0	0	1	0	1	1	1	4	1	CHEF
chr11	19986432	19986872	chr2	65583919	65585919	2005785	6.28225	0.758055	1	0	1	0	0	0	0	0	0	2	1	0	0	0	0	0	0	1	1	CHEF
chr12	39995894	39996305	chr7	12770313	12772313	2009638	6.25063	2.36712	1	1	0	0	0	0	0	0	0	2	0	0	0	0	0	0	1	1	1	CHEF
chr17	28522601	28523407	chr6	35698622	35700622	3018688	6.24504	5.69435	0	0	1	0	1	1	0	0	0	3	0	0	0	0	1	0	1	2	1	CHEF
chr4	45489884	45490420	chr9	38016280	38018280	4029372	6.23977	4.69442	1	1	1	0	1	0	0	0	0	4	1	1	1	0	1	0	1	5	1	CHEF
chr2	27540173	27540573	chr9	137029084	137031084	1023495	6.22781	3.31077	0	0	1	0	0	0	0	0	0	1	1	0	0	0	1	0	0	2	1	CHEF
chr7	79211204	79212017	chr15	89530331	89532331	6039389	6.21776	5.89904	1	1	1	1	0	1	0	0	1	6	0	0	0	0	1	0	0	1	1	CHEF
chr13	107890303	107890853	chr5	60626555	60628555	2012772	6.20272	2.5445	0	0	1	0	0	1	0	0	0	2	0	0	0	1	1	1	1	4	1	CHEF
chr2	170245677	170246089	chr20	52379686	52381686	2026402	6.20271	3.68747	1	1	0	0	0	0	0	0	0	2	1	1	1	0	1	0	1	5	1	CHEF
chr7	70788843	70789715	chr15	96453060	96455060	5039293	6.1879	1.81751	1	1	1	0	0	1	0	0	1	5	0	0	1	0	0	0	1	2	1	CHEF
chr4	53951706	53952798	chr9	108672824	108674824	2029520	6.18769	4.8583	0	1	0	1	0	0	0	0	0	2	1	0	1	0	1	0	1	4	1	CHEF
chr2	146834209	146834755	chr20	21080639	21082639	5025538	6.18184	2.32628	1	1	1	1	0	1	0	0	0	5	1	1	1	0	1	0	1	5	1	CHEF
chr4	108635039	108635475	chr1	52815976	52817976	1030165	6.17396	2.2831	0	1	0	0	0	0	0	0	0	1	0	0	1	0	0	0	1	2	1	CHEF
chr11	19917920	19918391	chr2	65664119	65666119	4005775	6.14295	1.66088	1	1	1	1	0	0	0	0	0	4	1	1	1	0	1	0	1	5	1	CHEF
chr5	135001139	135001635	chr7	73156466	73158466	4034752	6.13615	2.75029	0	1	1	1	0	1	0	0	0	4	0	1	1	0	1	0	0	3	1	CHEF
chr7	127253911	127254769	chr16	30428432	30430432	3040357	6.12758	1.82384	1	0	1	0	0	1	0	0	0	3	1	0	0	0	0	0	0	1	1	CHEF
chr11	51637879	51638535	chr5	177553774	177555774	3006315	6.12739	6.7379	0	0	1	0	1	0	0	0	1	3	0	0	0	0	0	0	0	0	1	CHEF
chr11	26103662	26104184	chr2	58766269	58768269	5005924	6.12589	6.73784	1	1	1	0	1	1	0	0	0	5	1	1	1	0	1	0	0	4	1	CHEF
chr2	156425561	156425971	chr20	34684846	34686846	2025829	6.10664	0.879677	1	1	0	0	0	0	0	0	0	2	1	0	1	0	0	0	1	3	1	CHEF
chr19	53557230	53557630	chr10	112288963	112290963	1022875	6.10154	2.94278	0	0	1	0	0	0	0	0	0	1	0	0	1	0	1	0	0	2	1	CHEF
chr13	44018754	44019199	chr6	14380690	14382690	3011644	6.09944	6.89979	1	1	1	0	0	0	0	0	0	3	1	1	1	0	0	0	1	4	1	CHEF
chr18	38631570	38631992	chr5	141735717	141737717	2020808	6.09173	6.36518	0	0	1	0	0	1	0	0	0	2	0	0	1	0	1	0	0	2	1	CHEF
chr2	38925072	38925518	chr9	127531087	127533087	3023984	6.08372	1.62069	1	1	1	0	0	0	0	0	0	3	1	0	1	0	0	0	1	3	1	CHEF
chr19	38348078	38348653	chr10	95608454	95610454	4022453	6.0584	1.82841	1	1	1	1	0	0	0	0	0	4	1	1	1	0	1	0	1	5	1	CHEF
chr2	109943133	109943621	chr11	27464464	27466464	4024898	6.02026	4.52859	1	1	1	0	0	0	1	0	0	4	1	1	1	0	1	0	1	5	1	CHEF
chr4	72199833	72200233	chr9	84302145	84304145	1029748	6.01947	6.36524	0	0	0	0	0	1	0	0	0	1	1	0	0	0	1	0	0	2	1	CHEF
chr17	83664632	83665119	chr2	42772395	42774395	4019990	6.01728	8.43703	1	1	1	1	0	0	0	0	0	4	1	1	1	0	1	0	1	5	1	CHEF
chr10	80960968	80961636	chr19	2539931	2541931	2004474	6.01199	4.4169	0	0	1	0	0	1	0	0	0	2	0	0	1	0	1	1	1	4	1	CHEF
chr10	103368960	103369381	chr12	85304307	85306307	3004945	6.01135	1.44224	1	1	1	0	0	0	0	0	0	3	0	0	0	0	0	0	1	1	1	CHEF
chr4	95684702	95685484	chr1	59911525	59913525	3029931	5.99638	1.45003	1	1	0	0	0	0	0	0	1	3	0	0	0	0	0	0	1	1	1	CHEF
chr12	41729747	41730372	chr7	110509432	110511432	6009671	5.97048	2.62096	1	1	1	1	0	0	1	0	1	6	0	0	0	0	0	0	0	0	1	CHEF
chr2	180219432	180219832	chr20	60935326	60937326	1026638	5.9635	5.60543	0	0	0	0	0	0	0	0	1	1	0	0	0	0	1	1	0	2	1	CHEF
chr6	34344121	34344696	chr7	134193515	134195515	3035765	5.96102	0.709714	1	1	0	0	0	1	0	0	0	3	0	0	0	0	0	0	1	1	1	CHEF
chr14	105860735	105861428	chr13	80870493	80872493	7014365	5.95371	4.67725	1	1	1	1	1	1	1	0	0	7	1	1	1	0	1	0	1	5	1	CHEF
chr8	92134051	92134520	chr16	54684573	54686573	3042552	5.93056	2.11199	1	1	1	0	0	0	0	0	0	3	1	1	1	0	1	0	0	4	1	CHEF
chr7	49348628	49349028	chr11	19839393	19841393	1039070	5.91603	7.10946	1	0	0	0	0	0	0	0	0	1	1	0	1	0	0	0	0	2	1	CHEF
chr5	64806020	64806552	chr4	38667888	38669888	2033020	5.91567	3.54175	0	1	0	0	0	0	0	0	1	2	1	0	1	1	1	0	0	4	1	CHEF
chr1	135185953	135186379	chr1	202070267	202072267	4001894	5.90024	2.43065	1	0	1	1	0	0	1	0	0	4	0	1	0	0	0	0	0	1	1	CHEF
chr6	125577837	125578237	chr12	6192895	6194895	1037361	5.86926	1.52583	0	0	0	0	0	0	0	0	1	1	0	0	1	0	1	0	1	3	1	CHEF
chr18	38636692	38637092	chr5	141741450	141743450	1020811	5.8592	6.09353	0	0	0	1	0	0	0	0	0	1	0	0	1	0	0	0	0	1	1	CHEF
chr3	97227414	97227884	chr1	147070652	147072652	2027982	5.85412	4.57483	0	0	1	0	0	1	0	0	0	2	0	0	0	0	1	1	0	2	1	CHEF
chr4	150371707	150372202	chr1	8762376	8764376	2031937	5.85082	3.33947	0	0	1	0	0	1	0	0	0	2	0	0	0	0	1	1	0	2	1	CHEF
chr19	53052026	53052832	chr10	111693948	111695948	3022850	5.84517	3.06327	1	0	1	1	0	0	0	0	0	3	1	0	1	0	1	0	1	4	1	CHEF
chr18	75360787	75361443	chr18	46485568	46487568	6021360	5.84109	5.83076	1	1	1	1	0	0	0	1	1	6	1	1	1	0	1	0	1	5	1	CHEF
chr3	83980182	83980903	chr4	154456359	154458359	3027557	5.82854	2.90093	1	1	1	0	0	0	0	0	0	3	1	0	1	0	1	0	1	4	1	CHEF
chr12	71296772	71297553	chr14	59092024	59094024	7009969	5.82227	3.22726	1	1	1	1	0	1	1	1	0	7	0	0	1	0	1	0	1	3	1	CHEF
chr1	133397466	133398426	chr1	204076894	204078894	5001792	5.797	4.58849	1	1	1	0	0	1	0	0	1	5	1	1	1	0	1	0	1	5	1	CHEF
chr2	44525138	44525733	chr2	144648550	144650550	4024001	5.79112	1.88356	1	1	1	1	0	0	0	0	0	4	1	1	1	0	1	0	1	5	1	CHEF
chr3	95667926	95668326	chr1	150539962	150541962	1027904	5.75259	4.95833	0	0	0	0	0	0	0	0	1	1	0	1	0	1	1	0	0	3	1	CHEF
chr15	53343479	53343911	chr8	119120548	119122548	3015070	5.72733	1.34272	1	1	1	0	0	0	0	0	0	3	0	0	1	0	0	0	0	1	1	CHEF
chr17	83861426	83862120	chr2	43036615	43038615	3020002	5.72171	5.03023	0	0	1	0	1	1	0	0	0	3	0	0	0	0	1	1	0	2	1	CHEF
chr10	91187859	91188259	chr12	98883966	98885966	1004781	5.68571	2.48542	0	1	0	0	0	0	0	0	0	1	0	1	1	0	1	0	1	4	1	CHEF
chr6	52078536	52079015	chr7	26987593	26989593	4036059	5.68301	4.39763	1	1	1	1	0	0	0	0	0	4	1	1	1	0	1	0	1	5	1	CHEF
chr3	65975374	65975817	chr3	156892674	156894674	2027427	5.67198	2.48821	0	1	1	0	0	0	0	0	0	2	0	0	0	0	1	1	0	2	1	CHEF
chr8	44971372	44971837	chr4	187608455	187610455	4041560	5.65874	3.75554	1	1	1	0	0	0	1	0	0	4	1	1	1	0	1	0	1	5	1	CHEF
chr5	122988022	122988422	chr12	122016271	122018271	1034375	5.65011	8.5874	0	0	0	0	0	1	0	0	0	1	0	0	0	0	0	0	0	0	1	CHEF
chr3	34668378	34668901	chr3	181447897	181449897	5027133	5.64505	2.22857	1	1	1	1	0	0	1	0	0	5	0	0	1	0	0	0	0	1	1	CHEF
chr13	28951821	28952268	chr6	21594840	21596840	1011350	5.62565	7.67486	0	0	0	0	0	1	0	0	0	1	0	0	0	0	0	0	0	0	1	CHEF
chr7	19747593	19747993	chr19	45350396	45352396	1038167	5.5877	7.38284	0	0	0	1	0	0	0	0	0	1	0	0	0	0	0	0	0	0	1	CHEF
chr4	86911612	86912300	chr9	19445628	19447628	2029868	5.57773	4.07458	0	0	1	0	0	1	0	0	0	2	1	0	1	0	1	0	0	3	1	CHEF
chr8	47320669	47321139	chr4	184798997	184800997	2041611	5.57747	0.967915	0	1	0	0	0	0	0	0	1	2	1	1	1	0	1	0	1	5	1	CHEF
chr15	77827265	77827696	chr22	36763815	36765815	2015503	5.57053	4.06684	1	0	0	0	0	0	0	0	1	2	0	1	1	0	0	0	1	3	1	CHEF
chr9	65606421	65606821	chr15	65098966	65100966	1044901	5.56034	7.69579	0	0	0	1	0	0	0	0	0	1	0	0	0	0	0	0	0	0	1	CHEF
chr12	80111357	80111819	chr14	69257333	69259333	2010176	5.55313	3.25007	0	1	0	0	0	0	0	1	0	2	0	1	1	0	0	0	1	3	1	CHEF
chr13	115089993	115090399	chr5	52094916	52096916	2012928	5.53165	5.17254	0	0	1	0	0	1	0	0	0	2	0	0	0	1	1	0	0	2	1	CHEF
chr2	153167949	153168587	chr20	30703768	30705768	7025699	5.52715	1.77854	1	1	1	1	1	1	1	0	0	7	0	0	1	0	0	0	0	1	1	CHEF
chr14	14632378	14633263	chr3	27574036	27576036	3013078	5.52534	3.83858	1	1	1	0	0	0	0	0	0	3	1	1	1	0	1	0	1	5	1	CHEF
chr5	137338227	137338627	chr7	100434072	100436072	1034894	5.52323	3.76806	0	0	1	0	0	0	0	0	0	1	0	0	0	0	1	1	0	2	1	CHEF
chr13	63720565	63721080	chr9	98516354	98518354	3012169	5.52276	2.14201	1	1	0	0	0	0	0	0	1	3	1	1	1	1	1	0	0	5	1	CHEF
chr6	144454159	144454770	chr12	24382169	24384169	5037671	5.51817	1.70188	0	1	1	0	0	0	1	1	1	5	0	1	1	0	1	0	1	4	1	CHEF
chr4	32923341	32923803	chr6	90192118	90194118	2029130	5.51742	2.00748	1	1	0	0	0	0	0	0	0	2	1	1	1	0	1	1	0	5	1	CHEF
chr13	28811547	28812022	chr6	21739733	21741733	2011346	5.50759	6.18905	0	1	1	0	0	0	0	0	0	2	0	0	0	0	1	0	0	1	1	CHEF
chr9	72779684	72780084	chr15	56077769	56079769	1045075	5.50316	1.31814	0	1	0	0	0	0	0	0	0	1	0	0	1	0	1	0	0	2	1	CHEF
chr4	72146000	72146451	chr9	84235353	84237353	3029746	5.49174	2.26143	1	1	1	0	0	0	0	0	0	3	1	0	1	0	0	0	1	3	1	CHEF
chr14	105920682	105921251	chr13	80933024	80935024	4014374	5.48984	3.88095	1	1	1	0	0	0	0	0	1	4	1	1	1	0	1	0	1	5	1	CHEF
chr4	76014125	76014849	chr9	8407578	8409578	4029765	5.47245	1.75187	1	1	1	0	0	0	0	0	1	4	0	0	1	0	0	0	1	2	1	CHEF
chr10	12549872	12550396	chr6	144978139	144980139	4003081	5.45031	3.76583	1	1	0	1	0	0	0	0	1	4	1	0	1	0	1	0	1	4	1	CHEF
chr13	51919942	51920342	chr9	92291395	92293395	1011852	5.39797	3.66305	0	0	0	1	0	0	0	0	0	1	1	0	0	0	0	0	1	2	1	CHEF
chr11	51649504	51649904	chr5	177540972	177542972	1006318	5.29158	8.24701	0	0	0	1	0	0	0	0	0	1	0	0	0	0	0	0	0	0	1	CHEF
chr2	18027389	18027790	chr10	21783833	21785833	1023241	5.27852	6.40161	0	0	0	0	0	1	0	0	0	1	0	0	0	1	1	1	0	3	1	CHEF
chr4	12662633	12663607	chr8	94229177	94231177	3028990	5.25212	3.93559	1	1	1	0	0	0	0	0	0	3	1	1	1	0	1	0	1	5	1	CHEF
chr6	133987069	133987558	chr12	11761154	11763154	3037456	5.2496	5.83569	1	1	1	0	0	0	0	0	0	3	1	1	1	0	1	0	1	5	1	CHEF
chr8	12871295	12871794	chr13	113545117	113547117	2041065	5.23765	2.5701	1	1	0	0	0	0	0	0	0	2	0	0	1	0	0	0	1	2	1	CHEF
chr14	122255410	122255888	chr13	100338360	100340360	3014522	5.23683	4.16265	1	1	1	0	0	0	0	0	0	3	1	0	1	0	1	0	1	4	1	CHEF
chr4	117415181	117415750	chr1	44965938	44967938	4030354	5.21115	3.039	1	1	1	1	0	0	0	0	0	4	1	0	1	0	0	0	1	3	1	CHEF
chr11	107413147	107413662	chr17	65441180	65443180	3008559	5.20407	1.88856	0	1	1	0	0	0	0	0	1	3	1	0	1	0	1	0	1	4	1	CHEF
chr1	59423034	59424023	chr2	202836876	202838876	7000696	5.20242	3.88407	1	1	1	1	1	0	1	0	1	7	1	1	1	0	1	0	0	4	1	CHEF
chr8	108722804	108723323	chr16	73073380	73075380	3042891	5.19439	1.51371	1	1	1	0	0	0	0	0	0	3	1	0	1	0	0	0	1	3	1	CHEF
chr7	90539601	90540074	chr11	85251883	85253883	3039637	5.19415	3.89406	1	1	1	0	0	0	0	0	0	3	1	1	1	0	1	0	0	4	1	CHEF
chr18	74907272	74907672	chr18	47138787	47140787	1021329	5.19006	2.39261	1	0	0	0	0	0	0	0	0	1	1	1	1	0	1	1	0	5	1	CHEF
chr6	121109488	121110384	chr22	18483022	18485022	3037202	5.18884	3.01659	0	0	1	1	0	1	0	0	0	3	0	0	1	0	0	0	1	2	1	CHEF
chr4	99636645	99637045	chr1	63759509	63761509	1029978	5.17746	7.15844	0	0	1	0	0	0	0	0	0	1	1	1	1	0	1	0	1	5	1	CHEF
chr5	135489032	135489750	chr7	75267691	75269691	4034781	5.17564	7.66805	1	0	1	0	0	1	0	0	1	4	1	1	1	1	1	1	0	6	1	CHEF
chr1	118458869	118460054	chr2	122287024	122289024	3001501	5.16241	4.1877	0	1	1	0	0	0	0	0	1	3	0	0	1	0	1	0	1	3	1	CHEF
chr14	52010380	52010780	chr14	21561363	21563363	1013600	5.15609	3.94859	0	1	0	0	0	0	0	0	0	1	0	0	1	0	1	0	0	2	1	CHEF
chr9	102726221	102726727	chr3	134082023	134084023	3045502	5.15428	6.31038	0	0	1	0	0	1	0	0	1	3	0	0	1	0	1	0	1	3	1	CHEF
chr17	28523914	28524314	chr6	35699465	35701465	1018689	5.14375	4.88838	0	0	0	1	0	0	0	0	0	1	0	0	0	0	1	0	1	2	1	CHEF
chr12	86831958	86832503	chr14	77421986	77423986	3010413	5.14054	7.4426	0	0	1	1	0	1	0	0	0	3	1	0	0	0	0	0	0	1	1	CHEF
chr7	49527422	49527837	chr11	20047866	20049866	1039077	5.12221	2.46674	0	1	0	0	0	0	0	0	0	1	1	1	1	1	1	0	1	6	1	CHEF
chr7	101969907	101970321	chr11	71751727	71753727	2039863	5.11876	4.91753	0	0	1	0	0	1	0	0	0	2	1	0	1	0	1	0	1	4	1	CHEF
chr10	84910612	84911343	chr12	107161076	107163076	5004657	5.11697	5.47481	1	1	1	1	0	0	1	0	0	5	1	1	1	1	1	0	1	6	1	CHEF
chr14	78288805	78289396	chr13	43166853	43168853	5014145	5.10535	4.36158	1	1	1	0	0	0	1	0	1	5	1	1	1	0	1	0	0	4	1	CHEF
chr12	56298331	56298929	chr14	36737776	36739776	3009817	5.07069	1.6713	1	1	1	0	0	0	0	0	0	3	1	1	1	0	1	0	1	5	1	CHEF
chr11	26210052	26210756	chr2	58654803	58656803	2005928	5.06994	7.22184	0	0	1	0	0	1	0	0	0	2	0	0	0	0	0	1	1	2	1	CHEF
chr13	111807588	111807988	chr5	56111874	56113874	1012834	5.05118	2.01278	0	0	0	0	0	1	0	0	0	1	0	0	1	0	1	0	1	3	1	CHEF
chr9	14173839	14174409	chr11	95070981	95072981	7043636	5.04753	2.9835	1	1	1	1	1	1	0	0	1	7	1	0	1	0	1	0	1	4	1	CHEF
chr3	25143940	25144493	chr3	174157664	174159664	2026973	5.04552	6.02487	0	0	1	0	0	1	0	0	0	2	0	0	0	0	1	0	1	2	1	CHEF
chr2	61402105	61402505	chr2	161825779	161827779	1024187	5.03243	2.51876	0	0	0	0	0	0	0	0	1	1	0	0	1	0	1	0	1	3	1	CHEF
chr14	12837890	12838671	chr3	62869095	62871095	3013057	5.0278	5.64874	1	1	1	0	0	0	0	0	0	3	1	1	1	0	1	0	1	5	1	CHEF
chr8	78097995	78098861	chr4	147977898	147979898	3042123	5.02049	1.29623	1	1	0	1	0	0	0	0	0	3	0	0	1	0	0	0	0	1	1	CHEF
chr14	122256268	122256738	chr13	100339207	100341207	1014523	5.01944	5.00075	0	0	1	0	0	0	0	0	0	1	0	0	1	0	1	0	1	3	1	CHEF
chrX	99332104	99332532	chrX	68248980	68250980	2046681	5.00312	1.88684	1	1	0	0	0	0	0	0	0	2	1	0	0	0	0	0	0	1	1	CHEF
chr10	67187770	67188170	chr10	65025579	65027579	2004031	4.99365	5.71053	1	1	0	0	0	0	0	0	0	2	0	0	1	0	1	0	1	3	1	CHEF
chr17	45612114	45612514	chr6	44168987	44170987	1019240	4.99347	3.79822	0	0	0	1	0	0	0	0	0	1	0	1	0	1	1	0	1	4	1	CHEF
chr10	66918658	66919058	chr10	65472826	65474826	1004005	4.9649	4.21745	0	0	0	1	0	0	0	0	0	1	1	1	1	0	1	0	1	5	1	CHEF
chr6	134887801	134888273	chr12	12836696	12838696	2037497	4.95695	3.29481	1	1	0	0	0	0	0	0	0	2	1	1	1	0	0	0	1	4	1	CHEF
chr2	118179341	118179741	chr15	39957927	39959927	1024972	4.95049	2.42512	0	0	0	0	0	1	0	0	0	1	0	0	1	0	1	0	0	2	1	CHEF
chr2	170772061	170772667	chr20	53141800	53143800	6026420	4.94785	1.47408	1	1	1	1	0	0	1	0	1	6	0	0	0	0	1	0	1	2	1	CHEF
chr14	86395959	86396445	chr13	59983012	59985012	4014214	4.92999	4.50282	1	1	1	0	0	0	1	0	0	4	1	1	1	0	1	0	1	5	1	CHEF
chr9	90133526	90134246	chr15	79142377	79144377	3045307	4.90616	1.23522	0	1	1	0	0	0	0	0	1	3	1	0	0	0	0	0	0	1	1	CHEF
chr10	62883779	62884227	chr10	70322257	70324257	2003957	4.88796	5.77137	1	0	1	0	0	0	0	0	0	2	0	0	1	0	0	0	0	1	1	CHEF
chr12	106175071	106176264	chr14	97491574	97493574	6010715	4.88285	2.69934	1	1	1	1	1	0	0	0	1	6	1	0	0	0	0	0	0	1	1	CHEF
chr10	111576028	111576791	chr12	76337008	76339008	2005015	4.88263	6.17401	0	0	1	1	0	0	0	0	0	2	1	1	1	0	1	0	1	5	1	CHEF
chr18	76556145	76556601	chr18	45086828	45088828	3021418	4.87531	3.13272	1	1	1	0	0	0	0	0	0	3	1	1	1	0	0	0	1	4	1	CHEF
chr6	122491536	122492018	chr12	8844392	8846392	4037233	4.87041	4.3245	1	1	1	0	0	0	0	0	1	4	0	0	0	1	1	0	1	3	1	CHEF
chr13	47855331	47856326	chr6	19311476	19313476	6011739	4.86213	3.53508	1	1	1	1	0	0	1	1	0	6	1	1	1	0	1	1	1	6	1	CHEF
chr4	133729635	133730192	chr1	27049036	27051036	2031123	4.86007	2.47022	0	1	1	0	0	0	0	0	0	2	1	0	0	0	0	0	1	2	1	CHEF
chr12	39740833	39741445	chr7	13056528	13058528	3009635	4.8585	1.98729	0	1	1	0	0	0	1	0	0	3	0	1	1	0	1	0	1	4	1	CHEF
chr4	117373451	117374395	chr1	45007794	45009794	5030350	4.85735	5.06594	1	1	1	0	0	1	0	0	1	5	1	1	1	0	1	0	1	5	1	CHEF
chr19	47450494	47451106	chr10	105599032	105601032	6022813	4.83314	1.49211	1	1	1	0	1	1	0	0	1	6	1	0	1	0	0	0	0	2	1	CHEF
chr4	54072887	54073310	chr9	108781184	108783184	2029522	4.83277	4.20976	1	1	0	0	0	0	0	0	0	2	1	1	0	0	0	0	0	2	1	CHEF
chr4	100096686	100097086	chr1	64239815	64241815	1029997	4.82466	5.95191	0	0	0	1	0	0	0	0	0	1	1	1	1	0	1	0	1	5	1	CHEF
chr4	99635931	99636433	chr1	63759119	63761119	5029977	4.82132	5.62603	1	1	1	0	1	0	1	0	0	5	1	1	1	0	1	0	1	5	1	CHEF
chr4	123633250	123633755	chr1	39597911	39599911	3030556	4.81438	3.76825	0	0	1	1	0	0	0	0	1	3	0	0	1	1	1	0	0	3	1	CHEF
chr8	120513146	120513546	chr16	85616091	85618091	1043222	4.81373	3.88087	0	0	0	1	0	0	0	0	0	1	0	0	1	0	0	0	1	2	1	CHEF
chr4	58912314	58912988	chr9	114245585	114247585	2029635	4.79462	8.06736	0	0	1	0	0	1	0	0	0	2	0	0	0	0	1	0	0	1	1	CHEF
chr3	131085239	131085639	chr4	109114040	109116040	1028515	4.79149	0.934492	0	0	1	0	0	0	0	0	0	1	1	1	1	0	1	0	1	5	1	CHEF
chr9	72808135	72808551	chr15	56033027	56035027	2045078	4.77602	0.800775	1	1	0	0	0	0	0	0	0	2	0	0	1	1	0	0	1	3	1	CHEF
chr11	69073282	69073913	chr17	8075883	8077883	3006850	4.77575	2.94453	1	1	0	0	1	0	0	0	0	3	1	0	1	0	1	0	0	3	1	CHEF
chr13	97580168	97580568	chr5	73567325	73569325	1012590	4.76235	1.69863	0	1	0	0	0	0	0	0	0	1	0	1	1	0	1	0	1	4	1	CHEF
chr7	34653045	34653445	chr19	34287970	34289970	1038657	4.74134	5.75194	0	0	0	0	0	1	0	0	0	1	0	0	1	0	0	0	1	2	1	CHEF
chr3	101163382	101163855	chr1	117395627	117397627	5028046	4.74053	4.39326	1	1	1	1	0	0	0	0	1	5	0	0	1	0	1	0	0	2	1	CHEF
chr13	53233780	53234180	chr9	94646550	94648550	1011889	4.73239	1.53905	0	1	0	0	0	0	0	0	0	1	0	1	0	0	0	0	1	2	1	CHEF
chr7	110116730	110117130	chr11	9589470	9591470	1039959	4.72248	3.33429	0	1	0	0	0	0	0	0	0	1	0	0	0	0	1	0	1	2	1	CHEF
chr17	13668600	13669031	chr6	168078591	168080591	2018255	4.7216	2.16624	1	1	0	0	0	0	0	0	0	2	1	0	0	0	0	0	0	1	1	CHEF
chr9	96725713	96726311	chr3	141111328	141113328	2045379	4.71816	1.84722	0	1	0	0	0	1	0	0	0	2	0	1	1	0	0	0	0	2	1	CHEF
chr14	64407729	64408613	chr8	9962535	9964535	6013875	4.71628	0.939342	1	1	1	0	1	1	0	0	1	6	0	0	1	0	1	0	0	2	1	CHEF
chr2	10363472	10363872	chr10	7464457	7466457	1023154	4.71286	2.13053	0	0	0	1	0	0	0	0	0	1	1	1	1	0	1	0	1	5	1	CHEF
chr2	153641560	153642059	chr20	31338731	31340731	3025732	4.71194	7.45383	1	1	1	0	0	0	0	0	0	3	1	1	1	0	1	0	1	5	1	CHEF
chr15	95804242	95805335	chr12	45627913	45629913	3016105	4.70875	4.01507	0	0	1	1	0	1	0	0	0	3	0	0	0	0	1	0	1	2	1	CHEF
chr2	174287889	174288317	chr20	57417604	57419604	3026561	4.6923	4.95747	1	1	1	0	0	0	0	0	0	3	0	0	1	0	0	0	0	1	1	CHEF
chr16	20536946	20537346	chr3	183893260	183895260	1016981	4.68706	6.59251	0	0	0	1	0	0	0	0	0	1	0	0	1	0	0	0	0	1	1	CHEF
chr13	63569156	63569587	chr9	98273892	98275892	2012163	4.67799	2.74105	1	0	1	0	0	0	0	0	0	2	0	0	1	0	1	0	1	3	1	CHEF
chr4	101508456	101509250	chr1	65730425	65732425	3030018	4.67014	1.98855	0	0	1	1	0	1	0	0	0	3	0	0	1	0	0	0	1	2	1	CHEF
chr8	12477776	12478510	chr13	112815215	112817215	2041050	4.66085	3.36258	0	1	0	1	0	0	0	0	0	2	0	1	1	0	1	0	0	3	1	CHEF
chr3	131084632	131085067	chr4	109114657	109116657	3028514	4.64482	0.854604	1	1	1	0	0	0	0	0	0	3	1	1	1	0	1	0	1	5	1	CHEF
chrX	52348560	52349236	chrX	132782795	132784795	3046439	4.64038	3.23603	1	1	1	0	0	0	0	0	0	3	0	1	1	0	1	0	1	4	1	CHEF
chr10	59354059	59354550	chr10	74803837	74805837	3003782	4.61987	3.52713	1	1	1	0	0	0	0	0	0	3	0	0	1	0	1	0	0	2	1	CHEF
chr5	103693191	103693671	chr4	87856286	87858286	3033560	4.61829	5.69284	1	0	1	0	0	0	0	0	1	3	1	1	1	0	0	0	0	3	1	CHEF
chr4	8647243	8647790	chr8	61563893	61565893	2028914	4.6123	1.99355	0	0	1	0	0	1	0	0	0	2	0	0	0	0	1	0	1	2	1	CHEF
chr2	166000762	166001162	chr20	46136230	46138230	1026142	4.59682	2.3536	0	1	0	0	0	0	0	0	0	1	0	0	1	0	1	0	1	3	1	CHEF
chr8	89271587	89272105	chr16	51425321	51427321	4042492	4.59232	4.88086	1	1	1	0	0	0	0	0	1	4	1	1	1	0	1	0	1	5	1	CHEF
chr10	63366129	63366544	chr10	69621257	69623257	3003987	4.58816	5.77279	1	1	0	0	0	0	0	0	1	3	1	1	1	0	1	0	1	5	1	CHEF
chr9	114549114	114549575	chr3	32878507	32880507	2045882	4.58664	4.15811	0	1	1	0	0	0	0	0	0	2	0	0	0	0	1	0	0	1	1	CHEF
chr6	120676701	120677143	chr22	17859835	17861835	2037191	4.58287	4.34154	0	1	1	0	0	0	0	0	0	2	0	1	1	0	1	0	1	4	1	CHEF
chr18	54827869	54828356	chr5	123915867	123917867	4020994	4.55098	3.82206	1	1	1	0	0	0	0	0	1	4	1	1	1	0	1	0	1	5	1	CHEF
chrX	143543105	143543537	chrX	110207156	110209156	3046898	4.54631	2.12493	1	1	1	0	0	0	0	0	0	3	1	0	0	0	0	0	0	1	1	CHEF
chr5	123057836	123058359	chr12	122124023	122126023	2034383	4.52562	1.99382	0	0	1	0	0	1	0	0	0	2	1	0	0	0	0	1	0	2	1	CHEF
chr1	89870570	89871111	chr2	236994757	236996757	5001278	4.52454	3.83308	1	1	1	0	0	1	1	0	0	5	0	1	1	0	1	0	0	3	1	CHEF
chr1	88612876	88613317	chr2	235270729	235272729	2001241	4.52312	2.30959	1	0	1	0	0	0	0	0	0	2	0	1	1	0	1	0	1	4	1	CHEF
chr5	92897651	92898494	chr4	77609648	77611648	4033392	4.52291	2.91663	1	1	1	0	0	1	0	0	0	4	1	0	0	0	0	0	0	1	1	CHEF
chr10	56374140	56374651	chr6	121751935	121753935	5003741	4.51236	7.8489	1	1	1	1	0	0	1	0	0	5	1	1	1	0	1	0	1	5	1	CHEF
chr17	56877374	56877774	chr19	6198482	6200482	1019611	4.50903	1.21457	0	0	1	0	0	0	0	0	0	1	1	0	0	0	0	0	1	2	1	CHEF
chr10	45070984	45071384	chr6	105845905	105847905	1003666	4.50717	1.39891	0	0	0	0	0	0	0	0	1	1	0	1	0	0	1	0	0	2	1	CHEF
chr9	65109303	65109784	chr15	65706725	65708725	2044874	4.50136	3.98934	1	0	0	0	0	1	0	0	0	2	1	0	1	0	1	0	0	3	1	CHEF
chr17	65702104	65702677	chr18	9807530	9809530	3019676	4.49875	3.09324	0	1	1	1	0	0	0	0	0	3	0	0	1	0	1	0	1	3	1	CHEF
chr4	45591313	45591838	chr9	38134338	38136338	4029383	4.49863	0.932798	1	1	1	0	0	1	0	0	0	4	0	0	1	0	0	0	0	1	1	CHEF
chr8	65034049	65034490	chr4	165800785	165802785	2041771	4.49297	3.76991	1	1	0	0	0	0	0	0	0	2	1	0	0	0	1	0	0	2	1	CHEF
chr3	108433405	108433920	chr1	109771607	109773607	5028247	4.46963	4.81021	1	1	1	0	0	1	0	0	1	5	1	1	1	1	1	0	1	6	1	CHEF
chr2	20723968	20724864	chr10	24739599	24741599	3023315	4.46209	0.72554	1	1	0	0	0	0	0	0	1	3	0	0	1	0	0	0	0	1	1	CHEF
chr12	81780577	81781930	chr14	71275624	71277624	3010235	4.46141	3.60168	0	0	1	0	0	1	0	0	1	3	0	0	0	1	0	1	1	3	1	CHEF
chr15	79950500	79950963	chr22	39569878	39571878	2015657	4.45972	5.53799	0	0	1	0	0	1	0	0	0	2	1	0	1	1	1	0	0	4	1	CHEF
chr8	120513815	120514215	chr16	85616649	85618649	1043223	4.45622	3.51077	0	0	1	0	0	0	0	0	0	1	0	0	1	0	0	0	1	2	1	CHEF
chr7	58225737	58226272	chr15	26479680	26481680	4039145	4.42215	4.00359	1	1	1	1	0	0	0	0	0	4	1	0	1	0	1	0	1	4	1	CHEF
chr2	26503621	26504395	chr9	139439670	139441670	4023456	4.39692	3.48879	1	1	0	0	1	1	0	0	0	4	1	0	0	1	0	0	0	2	1	CHEF
chr11	63898088	63898511	chr17	14234100	14236100	2006728	4.39419	4.72297	1	1	0	0	0	0	0	0	0	2	1	0	1	0	0	1	1	4	1	CHEF
chr5	146385961	146386440	chr13	27132227	27134227	3035236	4.38678	1.16412	0	1	0	1	0	0	0	0	1	3	0	1	0	0	0	0	1	2	1	CHEF
chr2	106822498	106822898	chr11	30474924	30476924	1024878	4.37506	1.96281	0	1	0	0	0	0	0	0	0	1	0	0	0	0	1	0	1	2	1	CHEF
chr18	38148702	38149166	chr5	141195413	141197413	3020769	4.37086	3.63033	1	1	1	0	0	0	0	0	0	3	1	1	1	0	1	0	1	5	1	CHEF
chr9	71879348	71879852	chr15	57528667	57530667	3045053	4.36801	1.58093	1	1	1	0	0	0	0	0	0	3	0	1	1	0	1	0	1	4	1	CHEF
chr15	80159266	80159739	chr22	39823744	39825744	2015671	4.36578	3.78736	0	0	0	0	1	1	0	0	0	2	0	0	0	0	1	1	1	3	1	CHEF
chr7	95480095	95480521	chr11	79877877	79879877	3039658	4.35736	1.29522	1	1	1	0	0	0	0	0	0	3	1	0	0	0	1	0	0	2	1	CHEF
chr1	13073843	13074974	chr8	70888763	70890763	4000133	4.35339	5.35643	1	1	1	1	0	0	0	0	0	4	1	1	1	0	1	0	1	5	1	CHEF
chr6	144251070	144251544	chr12	24166816	24168816	3037665	4.34402	1.01121	0	1	1	1	0	0	0	0	0	3	1	1	1	0	1	0	1	5	1	CHEF
chr7	29416980	29417380	chr19	38545501	38547501	2038515	4.34076	1.96865	0	0	0	1	0	0	0	0	1	2	0	0	1	0	0	0	1	2	1	CHEF
chr4	58911356	58911816	chr9	114244509	114246509	1029634	4.33716	7.45938	0	0	0	0	0	1	0	0	0	1	0	0	0	0	0	0	0	0	1	CHEF
chr8	126584003	126584485	chr1	234734814	234736814	2043488	4.33344	4.18165	0	0	1	0	0	1	0	0	0	2	0	0	0	0	0	1	1	2	1	CHEF
chr1	12814411	12814870	chr8	70508601	70510601	3000123	4.32785	1.49993	1	0	0	1	0	0	1	0	0	3	0	0	1	0	1	0	0	2	1	CHEF
chr1	119305105	119306113	chr2	121222838	121224838	7001549	4.32071	0.950663	1	1	1	1	1	1	0	0	1	7	1	1	1	1	1	1	1	7	1	CHEF
chr14	25377836	25378688	chr10	80732613	80734613	2013241	4.31689	5.10248	0	0	1	0	0	1	0	0	0	2	0	0	1	0	0	0	0	1	1	CHEF
chr13	114297721	114298190	chr5	52966600	52968600	2012916	4.30614	2.51304	0	0	1	0	0	0	0	0	1	2	1	1	1	0	1	0	1	5	1	CHEF
chr11	107349657	107350057	chr17	65515524	65517524	1008548	4.3026	3.39075	0	0	0	1	0	0	0	0	0	1	0	1	1	0	0	0	1	3	1	CHEF
chr5	131526730	131527196	chr7	70167954	70169954	3034658	4.29217	2.03488	1	1	1	0	0	0	0	0	0	3	1	1	1	0	0	0	1	4	1	CHEF
chr4	137461351	137461751	chr1	22269305	22271305	1031395	4.29185	2.21646	0	0	0	1	0	0	0	0	0	1	0	1	1	0	0	0	1	3	1	CHEF
chr17	47568958	47569358	chr6	41933593	41935593	1019382	4.28928	4.28933	0	0	0	1	0	0	0	0	0	1	0	0	0	0	1	0	1	2	1	CHEF
chr7	130860779	130861252	chr10	124127317	124129317	1040471	4.28545	1.31082	0	0	1	0	0	0	0	0	0	1	0	1	1	0	0	0	0	2	1	CHEF
chr18	10866064	10866600	chr18	19513229	19515229	4020301	4.27595	1.51347	1	1	1	0	0	0	0	0	1	4	1	1	1	0	1	0	1	5	1	CHEF
chr12	29095835	29096327	chr2	2879794	2881794	3009546	4.27272	1.46772	1	1	1	0	0	0	0	0	0	3	0	0	1	0	0	0	0	1	1	CHEF
chrX	19906686	19907322	chrX	46186322	46188322	4046297	4.24631	4.13736	1	1	1	1	0	0	0	0	0	4	1	1	1	0	1	0	1	5	1	CHEF
chr2	109942036	109942495	chr11	27465570	27467570	3024897	4.24591	4.61781	1	1	1	0	0	0	0	0	0	3	1	1	1	0	1	0	1	5	1	CHEF
chr7	130859988	130860388	chr10	124126679	124128679	1040470	4.2272	1.40535	1	0	0	0	0	0	0	0	0	1	0	1	1	0	0	0	0	2	1	CHEF
chr16	42305744	42306461	chr3	115376671	115378671	6017486	4.22315	5.73799	1	1	1	0	1	1	0	0	1	6	0	0	0	0	0	0	0	0	1	CHEF
chr6	94647395	94647930	chr3	66491838	66493838	2036765	4.21652	6.72049	0	0	1	1	0	0	0	0	0	2	0	0	1	0	1	0	0	2	1	CHEF
chr8	108726740	108727140	chr16	73069233	73071233	1042892	4.1894	1.90172	1	0	0	0	0	0	0	0	0	1	0	0	0	0	1	0	1	2	1	CHEF
chr4	132269951	132270399	chr1	28974095	28976095	2030990	4.18035	3.18679	0	1	0	0	1	0	0	0	0	2	1	0	1	0	1	0	1	4	1	CHEF
chr2	154465893	154466380	chr20	32155429	32157429	3025751	4.18034	1.29077	1	1	0	1	0	0	0	0	0	3	1	1	1	0	1	0	1	5	1	CHEF
chr10	66917742	66918311	chr10	65473350	65475350	4004004	4.1762	4.34042	1	1	1	1	0	0	0	0	0	4	0	0	0	0	0	0	0	0	1	CHEF
chr17	15677858	15678314	chr5	98297929	98299929	4018300	4.17028	1.44289	1	1	1	1	0	0	0	0	0	4	1	1	1	0	1	0	1	5	1	CHEF
chr2	30718386	30718786	chr9	132257452	132259452	1023635	4.16565	4.41075	0	0	0	1	0	0	0	0	0	1	0	0	0	0	1	0	1	2	1	CHEF
chr1	120643807	120644489	chr2	119564642	119566642	4001591	4.16372	3.08398	1	1	1	0	0	0	0	0	1	4	1	0	1	0	0	0	0	2	1	CHEF
chr8	90670750	90671178	chr16	52907117	52909117	3042506	4.15581	1.97802	1	1	1	0	0	0	0	0	0	3	1	1	1	0	1	0	1	5	1	CHEF
chr3	88539434	88539834	chr1	156042689	156044689	1027708	4.15496	2.20435	0	1	0	0	0	0	0	0	0	1	0	1	0	0	0	0	1	2	1	CHEF
chr2	153642960	153643452	chr20	31340261	31342261	3025733	4.15396	6.24058	1	1	1	0	0	0	0	0	0	3	0	0	0	0	0	0	0	0	1	CHEF
chr5	119709760	119710171	chr12	115076053	115078053	2034206	4.1539	2.0833	1	1	0	0	0	0	0	0	0	2	1	1	1	0	1	0	1	5	1	CHEF
chr15	68363097	68363561	chr8	135843697	135845697	2015243	4.15229	2.70862	0	0	1	0	0	1	0	0	0	2	0	0	0	0	1	0	1	2	1	CHEF
chr5	67633253	67633725	chr4	42426336	42428336	3033121	4.1399	2.11003	1	1	1	0	0	0	0	0	0	3	1	1	0	0	1	0	0	3	1	CHEF
chr16	76321603	76322111	chr21	16376921	16378921	5017723	4.1389	0.840469	1	1	1	1	0	0	0	0	1	5	1	1	1	1	1	0	1	6	1	CHEF
chr7	97804404	97804888	chr11	77167737	77169737	3039711	4.1332	3.49453	1	1	1	0	0	0	0	0	0	3	0	1	1	0	1	0	1	4	1	CHEF
chr14	64589776	64590347	chr8	9760499	9762499	3013880	4.13001	4.86691	0	0	1	0	1	1	0	0	0	3	1	0	0	0	0	0	0	1	1	CHEF
chr17	10335056	10335663	chr6	163816935	163818935	3018193	4.1265	1.45565	1	1	1	0	0	0	0	0	0	3	1	1	1	0	1	0	1	5	1	CHEF
chr12	79807929	79808329	chr14	68937537	68939537	1010161	4.09592	4.25728	0	1	0	0	0	0	0	0	0	1	1	1	1	0	1	0	1	5	1	CHEF
chr12	84624917	84625464	chr14	74792243	74794243	3010314	4.09202	10.0334	1	1	1	0	0	0	0	0	0	3	1	1	1	0	1	1	1	6	1	CHEF
chr1	5232779	5233179	chr8	54569523	54571523	1000038	4.09077	3.0543	0	1	0	0	0	0	0	0	0	1	0	0	1	0	1	0	1	3	1	CHEF
chr4	15234080	15234480	chr8	91682331	91684331	1029019	4.08426	2.0679	0	0	0	1	0	0	0	0	0	1	1	1	1	0	1	0	1	5	1	CHEF
chr4	153633212	153633708	chr1	4507267	4509267	3032068	4.08083	0.672741	1	1	1	0	0	0	0	0	0	3	1	0	1	0	1	0	0	3	1	CHEF
chr8	12502230	12502715	chr13	112858379	112860379	5041054	4.07557	1.1668	1	1	1	0	0	1	0	0	1	5	0	0	0	0	0	0	1	1	1	CHEF
chr17	36844474	36844939	chr6	30174177	30176177	2019118	4.06646	1.6354	0	1	1	0	0	0	0	0	0	2	0	0	1	0	0	0	1	2	1	CHEF
chr1	133434289	133434689	chr1	204033626	204035626	1001798	4.06139	3.49042	0	1	0	0	0	0	0	0	0	1	0	0	1	0	0	0	1	2	1	CHEF
chr3	129544428	129544828	chr4	111104621	111106621	1028487	4.04285	2.08563	0	0	0	1	0	0	0	0	0	1	1	1	1	0	1	0	1	5	1	CHEF
chr5	138991312	138992140	chr7	554275	556275	5034960	4.03834	5.45943	1	1	1	0	1	0	0	0	1	5	0	0	1	0	0	0	0	1	1	CHEF
chr16	30512362	30512982	chr3	194304876	194306876	2017205	4.03599	1.42573	0	0	0	1	1	0	0	0	0	2	0	0	1	0	0	0	1	2	1	CHEF
chr1	189916385	189916840	chr1	214462401	214464401	3002831	4.03092	1.49547	1	1	0	1	0	0	0	0	0	3	1	1	1	0	1	0	1	5	1	CHEF
chr4	84527054	84527522	chr9	16707828	16709828	3029833	4.02853	6.38677	1	1	1	0	0	0	0	0	0	3	0	0	0	0	1	0	0	1	1	CHEF
chr8	120509151	120509582	chr16	85612029	85614029	2043221	4.02748	2.61032	1	1	0	0	0	0	0	0	0	2	1	1	0	1	1	0	1	5	1	CHEF
chr10	17230140	17230619	chr6	140209128	140211128	3003130	4.02441	4.64423	0	1	1	0	0	1	0	0	0	3	1	1	1	0	1	0	1	5	1	CHEF
chr18	5163040	5163669	chr10	31073134	31075134	5020234	4.02123	2.18695	1	0	1	1	1	1	0	0	0	5	1	0	1	0	0	0	1	3	1	CHEF
chrX	162009862	162010270	chrX	17554988	17556988	2047001	4.01747	1.21624	0	1	1	0	0	0	0	0	0	2	0	0	1	0	0	0	0	1	1	CHEF
chr16	73096598	73097234	chr3	78555709	78557709	6017710	4.01613	1.45897	1	1	1	0	0	1	1	0	1	6	0	0	1	0	0	0	1	2	1	CHEF
chr9	46328617	46329054	chr11	116580555	116582555	2044298	4.01602	1.67703	0	1	1	0	0	0	0	0	0	2	1	1	1	0	0	0	0	3	1	CHEF
chr8	57651760	57652179	chr4	174089994	174091994	1041702	4.01559	7.31067	0	0	0	0	0	1	0	0	0	1	0	0	0	1	0	0	0	1	1	CHEF
chr18	63864208	63864648	chr18	54540222	54542222	3021130	3.98928	2.67409	1	1	1	0	0	0	0	0	0	3	1	1	1	0	1	0	1	5	1	CHEF
chr16	30510450	30510871	chr3	194303590	194305590	2017204	3.98891	2.86707	0	0	1	0	0	1	0	0	0	2	0	0	1	0	0	1	1	3	1	CHEF
chr6	94750524	94750984	chr3	66622380	66624380	4036768	3.98582	2.72124	1	1	1	0	0	0	0	0	1	4	1	1	1	0	1	0	1	5	1	CHEF
chr1	180571151	180571574	chr1	226591742	226593742	3002635	3.98502	7.73268	1	1	1	0	0	0	0	0	0	3	1	1	1	0	0	0	1	4	1	CHEF
chr6	70964070	70964508	chr2	88742060	88744060	4036270	3.98448	5.14672	1	1	0	1	0	1	0	0	0	4	1	1	1	0	1	0	0	4	1	CHEF
chr9	72871751	72872151	chr15	55952697	55954697	1045082	3.98256	2.69261	0	0	0	1	0	0	0	0	0	1	1	1	1	0	1	0	1	5	1	CHEF
chr6	127336440	127337298	chr12	4133832	4135832	5037390	3.97899	7.87229	1	1	1	1	0	0	0	0	1	5	1	1	1	0	1	0	1	5	1	CHEF
chr10	88547547	88548019	chr12	102046757	102048757	4004742	3.97663	0.928252	0	1	0	1	1	1	0	0	0	4	0	0	1	0	0	0	1	2	1	CHEF
chr4	84528332	84528793	chr9	16709073	16711073	3029834	3.97282	7.09396	1	1	1	0	0	0	0	0	0	3	1	0	0	0	1	0	0	2	1	CHEF
chr1	59472289	59473365	chr2	202887184	202889184	5000699	3.96598	4.08392	1	1	1	0	0	1	0	0	1	5	1	1	1	0	1	0	1	5	1	CHEF
chr19	44314462	44314862	chr10	102132203	102134203	1022608	3.96422	4.87663	0	0	1	0	0	0	0	0	0	1	0	0	1	0	1	0	0	2	1	CHEF
chr18	35874951	35875358	chr5	139077521	139079521	2020674	3.96389	2.78465	1	0	0	0	0	0	0	0	1	2	1	0	0	1	1	0	0	3	1	CHEF
chr17	10441343	10442172	chr6	163680526	163682526	4018205	3.95165	2.69607	1	1	1	0	1	0	0	0	0	4	1	1	1	0	1	0	1	5	1	CHEF
chr1	59487319	59487813	chr2	202902684	202904684	4000701	3.94812	1.4175	1	1	1	1	0	0	0	0	0	4	0	0	0	0	1	0	1	2	1	CHEF
chr8	84004378	84005044	chr19	14191541	14193541	3042256	3.94171	1.94066	0	0	1	0	1	1	0	0	0	3	1	0	0	0	1	1	0	3	1	CHEF
chr1	119347726	119348879	chr2	121191888	121193888	4001552	3.93932	2.01379	1	1	1	1	0	0	0	0	0	4	1	0	0	0	0	0	0	1	1	CHEF
chr17	68003906	68004418	chr18	6728567	6730567	4019745	3.93733	3.44108	0	1	1	0	1	1	0	0	0	4	1	0	0	0	0	0	0	1	1	CHEF
chr2	117018875	117019336	chr15	38421921	38423921	2024963	3.92473	1.04829	1	1	0	0	0	0	0	0	0	2	0	0	0	0	0	1	1	2	1	CHEF
chr7	145136016	145136432	chr11	69024913	69026913	2040872	3.9174	1.79834	1	1	0	0	0	0	0	0	0	2	1	0	1	0	0	0	1	3	1	CHEF
chr2	146302297	146302762	chr20	20443827	20445827	4025527	3.91162	2.10562	1	1	1	0	0	0	0	0	1	4	1	1	1	0	1	0	1	5	1	CHEF
chr6	34559494	34559894	chr7	134426752	134428752	1035767	3.90752	2.069	0	0	0	1	0	0	0	0	0	1	0	0	0	0	1	0	1	2	1	CHEF
chr13	53234751	53235361	chr9	94648347	94650347	5011890	3.90393	1.19333	1	1	1	0	1	1	0	0	0	5	0	0	1	0	0	0	1	2	1	CHEF
chr1	132850773	132851373	chr1	204682968	204684968	4001759	3.90311	1.92106	1	1	1	1	0	0	0	0	0	4	1	0	1	0	1	0	1	4	1	CHEF
chr15	27581586	27582001	chr5	14727687	14729687	1014800	3.89394	3.85214	0	1	0	0	0	0	0	0	0	1	1	1	1	0	1	0	1	5	1	CHEF
chr4	108362661	108363371	chr1	53124962	53126962	3030155	3.89284	2.66112	0	1	0	1	0	0	0	0	1	3	0	0	1	1	0	0	1	3	1	CHEF
chr10	111867530	111867930	chr12	76025523	76027523	1005023	3.88983	2.90647	0	1	0	0	0	0	0	0	0	1	0	0	1	0	0	0	1	2	1	CHEF
chr11	81612950	81613597	chr17	32077132	32079132	3007395	3.88124	2.03808	1	1	1	0	0	0	0	0	0	3	1	1	1	0	1	0	1	5	1	CHEF
chr16	13868016	13868459	chr1	145138712	145140712	1016815	3.87894	1.16319	0	0	0	0	0	1	0	0	0	1	0	0	0	0	1	0	1	2	1	CHEF
chr2	17933231	17933667	chr10	21676680	21678680	2023227	3.87745	3.63683	1	1	0	0	0	0	0	0	0	2	1	0	0	0	0	0	1	2	1	CHEF
chr8	83876168	83876625	chr19	14357509	14359509	2042245	3.85937	5.09018	0	0	1	0	0	1	0	0	0	2	1	1	1	1	1	0	1	6	1	CHEF
chr8	92071572	92072071	chr16	54624636	54626636	3042549	3.8486	3.13908	1	1	1	0	0	0	0	0	0	3	0	0	0	0	0	0	1	1	1	CHEF
chrX	52163652	52164153	chrX	132547014	132549014	3046432	3.8455	4.79714	1	1	1	0	0	0	0	0	0	3	0	0	0	0	0	0	0	0	1	CHEF
chr14	63460637	63461037	chr8	11284026	11286026	1013858	3.84325	2.5047	1	0	0	0	0	0	0	0	0	1	0	0	0	0	1	0	1	2	1	CHEF
chr7	138153467	138154014	chr10	132799928	132801928	4040621	3.80139	4.09542	1	1	1	0	0	0	0	0	1	4	0	0	1	0	1	0	0	2	1	CHEF
chr17	9905822	9906222	chr6	164364009	164366009	1018183	3.79356	4.64238	0	1	0	0	0	0	0	0	0	1	0	0	1	0	0	0	0	1	1	CHEF
chr11	49810100	49810500	chr5	179757918	179759918	1006254	3.77918	4.71766	0	0	0	0	0	0	0	0	1	1	0	0	1	0	1	0	1	3	1	CHEF
chr14	48700883	48701579	chr14	57313215	57315215	7013550	3.75483	1.99355	1	1	1	1	1	0	1	0	1	7	1	1	1	0	1	0	1	5	1	CHEF
chr9	41736442	41736919	chr11	121798934	121800934	2044118	3.74665	1.94997	0	0	0	1	0	1	0	0	0	2	0	0	1	0	0	0	1	2	1	CHEF
chr19	3324522	3324962	chr11	68606665	68608665	3021619	3.7339	2.42225	1	1	0	0	0	0	0	0	1	3	0	0	1	1	0	0	1	3	1	CHEF
chr17	47567365	47567765	chr6	41933803	41935803	1019381	3.73075	4.14122	0	0	0	0	0	0	0	0	1	1	0	0	0	0	1	0	1	2	1	CHEF
chr11	24081785	24082197	chr2	60775777	60777777	1005910	3.72659	5.7255	0	0	0	0	0	1	0	0	0	1	0	0	1	0	0	0	0	1	1	CHEF
chr3	147181543	147182101	chr1	84157724	84159724	5028726	3.71085	5.0094	1	1	1	1	0	0	1	0	0	5	1	1	1	0	1	0	1	5	1	CHEF
chr4	136146608	136147292	chr1	23881617	23883617	7031322	3.7105	4.0766	1	1	1	1	1	0	1	0	1	7	1	1	1	0	1	0	1	5	1	CHEF
chr8	10664078	10664478	chr13	109924907	109926907	1040993	3.70841	2.63928	0	0	1	0	0	0	0	0	0	1	1	1	0	0	1	0	0	3	1	CHEF
chr7	130252022	130252560	chr10	123338829	123340829	5040442	3.69206	3.65592	1	1	1	1	0	0	1	0	0	5	1	0	1	0	1	0	1	4	1	CHEF
chr5	44100461	44101267	chr4	16083457	16085457	2032866	3.68593	2.51762	0	0	1	0	0	1	0	0	0	2	0	0	1	0	1	1	0	3	1	CHEF
chr13	23698407	23698807	chr6	26103037	26105037	1011291	3.6803	4.58131	0	1	0	0	0	0	0	0	0	1	0	0	0	0	1	0	0	1	1	CHEF
chr16	22505731	22506131	chr3	185911364	185913364	1017072	3.67011	1.13604	0	1	0	0	0	0	0	0	0	1	1	0	1	0	1	0	1	4	1	CHEF
chr11	57583103	57583503	chr5	153486467	153488467	1006472	3.66914	1.84723	0	1	0	0	0	0	0	0	0	1	1	1	1	0	0	0	0	3	1	CHEF
chr5	97218665	97219123	chr4	80003766	80005766	3033436	3.66123	0.906095	1	1	1	0	0	0	0	0	0	3	1	0	1	0	1	0	1	4	1	CHEF
chr12	28817280	28817802	chr2	3268982	3270982	3009544	3.6587	2.72476	1	1	1	0	0	0	0	0	0	3	1	1	1	0	1	0	1	5	1	CHEF
chr10	13107771	13108381	chr6	144293491	144295491	4003104	3.65726	1.45739	1	1	1	1	0	0	0	0	0	4	1	1	1	0	1	0	1	5	1	CHEF
chr19	37877632	37878229	chr10	95031844	95033844	7022433	3.65694	5.82643	1	1	1	1	1	1	1	0	0	7	1	1	1	0	1	0	1	5	1	CHEF
chr17	26502637	26503070	chr5	172191206	172193206	2018535	3.65034	1.7947	0	1	0	0	0	0	0	0	1	2	0	1	1	1	0	0	0	3	1	CHEF
chr4	104368608	104369073	chr1	57887393	57889393	4030046	3.6489	2.64886	1	1	1	0	1	0	0	0	0	4	0	0	1	0	0	0	0	1	1	CHEF
chr9	62338108	62338555	chr15	69115594	69117594	3044747	3.63454	0.662357	1	1	1	0	0	0	0	0	0	3	0	1	1	0	1	0	1	4	1	CHEF
chr5	23413044	23413444	chr7	104618075	104620075	1032376	3.63267	2.17429	0	0	1	0	0	0	0	0	0	1	0	0	1	0	0	0	1	2	1	CHEF
chr8	44959465	44959865	chr4	187621569	187623569	1041558	3.62966	2.35764	0	1	0	0	0	0	0	0	0	1	0	0	1	0	1	0	0	2	1	CHEF
chr11	109358824	109359727	chr17	63057219	63059219	3008609	3.62374	2.3921	1	0	1	1	0	0	0	0	0	3	1	0	1	0	0	0	0	2	1	CHEF
chr9	65679289	65679689	chr15	64991216	64993216	1044910	3.62301	8.18642	0	0	0	0	0	1	0	0	0	1	0	0	1	0	1	0	1	3	1	CHEF
chr1	177718561	177718993	chr1	244503632	244505632	1002552	3.62229	2.22039	0	0	1	0	0	0	0	0	0	1	0	0	1	0	1	0	0	2	1	CHEF
chr14	48754038	48754503	chr14	57369217	57371217	3013557	3.62141	3.8102	1	1	1	0	0	0	0	0	0	3	1	0	1	0	1	0	1	4	1	CHEF
chr8	87716368	87716804	chr16	49590231	49592231	3042427	3.619	3.15168	1	1	1	0	0	0	0	0	0	3	1	1	0	0	1	0	0	3	1	CHEF
chr18	66429084	66429496	chr18	57530597	57532597	3021213	3.61858	3.25147	1	1	1	0	0	0	0	0	0	3	1	1	1	0	1	0	1	5	1	CHEF
chr13	44751679	44752136	chr6	15264213	15266213	4011680	3.61679	2.80083	1	1	1	0	0	0	1	0	0	4	1	1	1	0	1	0	1	5	1	CHEF
chr6	122715838	122716322	chr12	8057438	8059438	2037249	3.61052	7.88068	1	1	0	0	0	0	0	0	0	2	1	1	1	0	1	0	1	5	1	CHEF
chr17	87613350	87613750	chr2	47571306	47573306	1020129	3.60997	5.63663	0	1	0	0	0	0	0	0	0	1	0	1	1	0	1	0	1	4	1	CHEF
chr4	129238093	129238493	chr1	33219554	33221554	1030834	3.6039	5.47272	0	0	1	0	0	0	0	0	0	1	0	0	0	1	1	0	0	2	1	CHEF
chr2	105397765	105398196	chr11	32113456	32115456	3024847	3.60211	1.51294	0	1	1	1	0	0	0	0	0	3	1	1	1	0	0	0	1	4	1	CHEF
chr10	3891786	3892225	chr6	151073834	151075834	3002963	3.59388	1.39084	1	1	1	0	0	0	0	0	0	3	0	0	1	0	1	0	0	2	1	CHEF
chr10	21054335	21054756	chr6	135643886	135645886	3003237	3.59259	1.70585	1	1	1	0	0	0	0	0	0	3	0	0	0	0	0	0	1	1	1	CHEF
chr16	30069498	30070051	chr3	193857655	193859655	2017183	3.5916	5.19437	0	0	0	1	0	0	0	0	1	2	0	0	1	0	1	0	0	2	1	CHEF
chr11	88534251	88534700	chr17	55542718	55544718	3007603	3.58595	3.53714	1	1	1	0	0	0	0	0	0	3	1	1	1	0	1	0	1	5	1	CHEF
chr3	34646200	34646631	chr3	181424991	181426991	4027126	3.58149	6.04615	1	1	1	0	0	0	1	0	0	4	1	0	1	0	1	0	1	4	1	CHEF
chr4	100097385	100097893	chr1	64240600	64242600	3029998	3.58088	6.23861	1	1	1	0	0	0	0	0	0	3	1	1	1	0	1	0	1	5	1	CHEF
chr11	105285765	105286165	chr17	60693865	60695865	1008467	3.57596	4.00235	0	0	1	0	0	0	0	0	0	1	0	0	0	1	1	0	0	2	1	CHEF
chr18	38174755	38175195	chr5	141217690	141219690	2020771	3.56961	7.60109	1	1	0	0	0	0	0	0	0	2	1	1	1	0	1	0	1	5	1	CHEF
chr6	30546713	30547113	chr7	129911703	129913703	1035691	3.56107	3.59855	0	0	0	0	0	0	0	0	1	1	0	0	1	1	0	0	0	2	1	CHEF
chr6	82174878	82175445	chr2	75632043	75634043	4036385	3.54972	1.36565	1	1	1	1	0	0	0	0	0	4	0	0	0	0	1	0	0	1	1	CHEF
chr5	135794292	135794744	chr7	75806616	75808616	2034796	3.54831	1.79263	1	0	1	0	0	0	0	0	0	2	1	0	0	1	0	0	0	2	1	CHEF
chr16	31546880	31547310	chr3	197143463	197145463	2017251	3.54629	0.93706	0	1	1	0	0	0	0	0	0	2	0	0	1	0	0	0	0	1	1	CHEF
chr1	72827962	72828421	chr2	217501156	217503156	2000894	3.53615	2.16597	0	1	0	1	0	0	0	0	0	2	0	0	0	1	0	0	1	2	1	CHEF
chr12	99299824	99300269	chr14	89761751	89763751	4010520	3.52686	5.94635	1	1	1	0	0	0	1	0	0	4	1	1	1	0	1	0	1	5	1	CHEF
chr9	72812452	72812867	chr15	56028836	56030836	2045079	3.52249	0.752743	1	1	0	0	0	0	0	0	0	2	1	0	1	0	1	0	1	4	1	CHEF
chr3	127544556	127545040	chr4	113569148	113571148	3028461	3.51627	5.99815	1	1	1	0	0	0	0	0	0	3	1	1	1	0	1	0	1	5	1	CHEF
chr8	89073020	89073697	chr16	51214592	51216592	3042486	3.51331	4.96584	0	1	1	1	0	0	0	0	0	3	1	1	1	0	1	0	1	5	1	CHEF
chr17	47975318	47976289	chr6	41470380	41472380	3019432	3.51059	2.11411	1	0	1	0	0	1	0	0	0	3	0	0	1	0	0	0	1	2	1	CHEF
chr9	55598481	55599131	chr15	76691371	76693371	4044503	3.50832	1.30219	1	1	1	0	0	0	0	0	1	4	1	1	1	0	1	0	1	5	1	CHEF
chr3	98024345	98024762	chr1	120601111	120603111	1028002	3.50327	1.82344	0	0	1	0	0	0	0	0	0	1	1	1	1	0	1	0	1	5	1	CHEF
chr16	29882614	29883518	chr3	193660448	193662448	3017166	3.50113	2.98421	1	1	1	0	0	0	0	0	0	3	0	0	1	0	0	0	1	2	1	CHEF
chr19	3323839	3324272	chr11	68607399	68609399	3021618	3.50057	2.30078	0	0	1	1	0	1	0	0	0	3	0	0	1	0	0	0	1	2	1	CHEF
chr16	16599492	16600346	chr12	32551792	32553792	3016857	3.50035	6.22506	0	0	1	0	1	1	0	0	0	3	0	0	1	1	0	0	1	3	1	CHEF
chr2	156642774	156643437	chr20	34960305	34962305	3025841	3.49651	1.13604	1	1	0	0	0	0	0	0	1	3	1	0	1	0	0	0	1	3	1	CHEF
chr17	23695772	23696172	chr16	3057240	3059240	1018372	3.49596	7.78654	0	0	0	0	0	0	0	0	1	1	1	1	1	0	1	0	1	5	1	CHEF
chr2	170469534	170469960	chr20	52749075	52751075	2026411	3.49571	1.26312	0	1	1	0	0	0	0	0	0	2	0	0	1	0	0	0	1	2	1	CHEF
chr12	84203137	84203537	chr14	74237059	74239059	1010292	3.4905	1.2582	0	0	0	0	0	0	0	0	1	1	0	0	0	0	1	0	1	2	1	CHEF
chr4	54071899	54072383	chr9	108780353	108782353	3029521	3.48602	3.62762	1	0	1	1	0	0	0	0	0	3	0	0	1	0	0	0	0	1	1	CHEF
chr19	55543156	55543657	chr10	114477537	114479537	3022906	3.48579	1.72716	1	1	1	0	0	0	0	0	0	3	0	0	0	0	1	0	0	1	1	CHEF
chr1	191224258	191224691	chr1	212731326	212733326	3002867	3.48367	2.09685	0	0	1	0	1	1	0	0	0	3	0	0	0	1	1	1	1	4	1	CHEF
chr6	25033022	25033540	chr7	123770729	123772729	5035588	3.46564	1.01395	1	1	1	0	0	0	1	0	1	5	0	0	1	0	1	0	1	3	1	CHEF
chr17	50427602	50428080	chr3	16851266	16853266	3019483	3.46133	2.50507	1	1	1	0	0	0	0	0	0	3	1	0	1	0	1	0	1	4	1	CHEF
chr19	53697681	53698093	chr10	112426885	112428885	2022884	3.45872	1.44289	1	1	0	0	0	0	0	0	0	2	1	0	1	0	1	0	1	4	1	CHEF
chr10	21923616	21924016	chr6	134588255	134590255	1003279	3.4558	1.72136	0	0	0	1	0	0	0	0	0	1	0	0	1	0	1	0	0	2	1	CHEF
chr9	49961897	49962340	chr11	112667063	112669063	3044391	3.4429	1.50567	1	1	0	1	0	0	0	0	0	3	1	0	0	0	0	0	0	1	1	CHEF
chr4	133085093	133085500	chr1	27853733	27855733	2031055	3.43843	2.95306	0	0	1	0	0	1	0	0	0	2	0	0	1	0	1	0	1	3	1	CHEF
chr4	55208870	55209396	chr9	109892645	109894645	2029543	3.42591	1.78662	0	1	1	0	0	0	0	0	0	2	0	0	1	0	0	1	1	3	1	CHEF
chr9	49935988	49936388	chr11	112692430	112694430	1044389	3.42447	2.42903	1	0	0	0	0	0	0	0	0	1	1	0	1	0	0	0	0	2	1	CHEF
chr12	86836691	86837091	chr14	77427450	77429450	1010414	3.40971	6.10037	0	0	1	0	0	0	0	0	0	1	1	0	1	0	0	0	1	3	1	CHEF
chr11	44761443	44761901	chr5	158384259	158386259	3006174	3.40725	0.978843	1	1	1	0	0	0	0	0	0	3	1	1	1	0	1	0	1	5	1	CHEF
chrX	52189123	52189550	chrX	132573757	132575757	2046435	3.40625	2.95179	0	1	1	0	0	0	0	0	0	2	0	0	1	0	1	0	0	2	1	CHEF
chr9	62363575	62363993	chr15	69086758	69088758	2044753	3.40454	1.24406	0	0	1	0	0	1	0	0	0	2	1	0	0	1	0	0	0	2	1	CHEF
chr5	115404309	115404811	chr12	120825973	120827973	2034019	3.404	2.57146	0	1	1	0	0	0	0	0	0	2	0	1	1	0	0	0	1	3	1	CHEF
chr3	18695419	18695833	chr8	66130819	66132819	2026911	3.40252	1.8997	1	1	0	0	0	0	0	0	0	2	1	1	1	0	1	0	1	5	1	CHEF
chr10	22609066	22609466	chr6	134394641	134396641	1003296	3.39573	2.56521	0	1	0	0	0	0	0	0	0	1	1	1	1	0	0	0	0	3	1	CHEF
chr5	114571476	114571969	chr12	110155407	110157407	5033939	3.39346	1.12294	1	1	1	0	0	1	0	0	1	5	0	0	0	0	0	0	1	1	1	CHEF
chr2	179571232	179571652	chr20	60010861	60012861	2026613	3.37332	7.02844	1	1	0	0	0	0	0	0	0	2	1	1	1	1	1	0	1	6	1	CHEF
chrX	52753409	52754162	chrX	133314636	133316636	3046446	3.37024	1.49001	1	1	1	0	0	0	0	0	0	3	1	0	1	0	1	0	1	4	1	CHEF
chr5	131177156	131177574	chr7	70777743	70779743	2034647	3.36414	2.53508	1	1	0	0	0	0	0	0	0	2	1	0	1	0	0	0	0	2	1	CHEF
chr17	6860381	6860955	chr6	159330692	159332692	4018132	3.34914	4.67077	1	1	1	0	0	0	0	0	1	4	0	1	1	0	1	0	1	4	1	CHEF
chr11	10051520	10051984	chr7	48981265	48983265	3005687	3.34882	0.953381	1	1	1	0	0	0	0	0	0	3	0	0	0	0	0	0	1	1	1	CHEF
chr2	17935958	17936358	chr10	21678772	21680772	1023228	3.34433	3.68511	0	0	0	1	0	0	0	0	0	1	0	0	1	0	1	0	0	2	1	CHEF
chrX	140458215	140458646	chrX	106872319	106874319	2046881	3.34185	1.52002	1	1	0	0	0	0	0	0	0	2	1	0	0	0	0	0	0	1	1	CHEF
chr8	83874635	83875501	chr19	14359234	14361234	3042244	3.33972	6.70529	0	0	1	1	0	1	0	0	0	3	0	0	0	1	0	0	1	2	1	CHEF
chr2	171285634	171286047	chr20	53781833	53783833	1026434	3.33407	1.20861	0	1	0	0	0	0	0	0	0	1	0	1	1	0	1	0	1	4	1	CHEF
chr15	37215515	37215962	chr8	102471771	102473771	2014931	3.33355	1.06416	0	0	1	1	0	0	0	0	0	2	0	0	1	0	1	0	1	3	1	CHEF
chr4	150890616	150891016	chr1	8051075	8053075	1031955	3.32646	3.26378	0	0	0	0	0	0	0	0	1	1	1	0	1	0	1	0	0	3	1	CHEF
chr3	148343540	148343940	chr1	82950623	82952623	1028732	3.324	3.00739	0	1	0	0	0	0	0	0	0	1	1	1	1	0	0	0	0	3	1	CHEF
chr11	19811305	19812139	chr2	65806360	65808360	3005769	3.31948	1.64046	1	1	1	0	0	0	0	0	0	3	0	0	1	0	1	0	0	2	1	CHEF
chr3	144421774	144422220	chr1	87582555	87584555	3028680	3.31844	0.939342	1	1	1	0	0	0	0	0	0	3	0	0	1	0	0	0	0	1	1	CHEF
chr11	101787482	101787929	chr17	41625994	41627994	2008288	3.31826	1.3458	1	1	0	0	0	0	0	0	0	2	0	0	0	0	0	0	1	1	1	CHEF
chr18	10461001	10461505	chr18	18966069	18968069	3020292	3.31194	0.820958	1	1	1	0	0	0	0	0	0	3	1	1	1	0	1	0	1	5	1	CHEF
chr8	78556637	78557199	chr4	147392755	147394755	4042145	3.31005	1.44452	1	1	1	0	0	0	1	0	0	4	1	0	0	0	0	0	0	1	1	CHEF
chr12	72853904	72854793	chr14	60822495	60824495	4010017	3.3085	1.00313	1	1	1	0	0	0	0	0	1	4	0	0	0	0	1	0	0	1	1	CHEF
chr15	38473520	38473969	chr8	103822012	103824012	3014968	3.3044	2.83587	0	0	1	0	1	1	0	0	0	3	0	0	0	0	1	1	1	3	1	CHEF
chr4	99654568	99654968	chr1	63785887	63787887	1029982	3.29325	4.56524	0	0	0	1	0	0	0	0	0	1	0	0	1	0	1	0	0	2	1	CHEF
chr5	121536725	121537387	chr12	112305785	112307785	3034284	3.2897	5.23362	0	1	1	1	0	0	0	0	0	3	1	1	1	0	1	0	1	5	1	CHEF
chr19	36904146	36905084	chr10	93646225	93648225	3022401	3.28759	2.97494	1	0	1	0	0	1	0	0	0	3	0	1	1	0	1	0	0	3	1	CHEF
chr9	32369450	32369890	chr11	128740206	128742206	2043989	3.28574	2.24438	1	0	0	0	1	0	0	0	0	2	1	0	1	0	1	0	0	3	1	CHEF
chr5	115435621	115436795	chr12	120799148	120801148	4034022	3.28347	2.80169	0	0	1	0	1	1	0	0	1	4	0	1	1	0	1	0	1	4	1	CHEF
chr19	3325261	3325722	chr11	68605908	68607908	2021620	3.28214	2.64885	0	0	1	0	0	1	0	0	0	2	0	0	1	1	0	0	1	3	1	CHEF
chr10	99265327	99265739	chr12	89742773	89744773	2004924	3.28092	1.89293	0	1	1	0	0	0	0	0	0	2	1	1	1	0	1	0	1	5	1	CHEF
chr11	69600185	69600585	chr17	7559232	7561232	1006890	3.27645	6.09316	0	0	0	0	0	0	0	1	0	1	1	0	1	0	0	0	0	2	1	CHEF
chr9	65196302	65197149	chr15	65595823	65597823	2044885	3.2709	2.23462	0	1	0	0	0	1	0	0	0	2	0	0	1	0	1	0	1	3	1	CHEF
chrX	101935342	101935951	chrX	71215867	71217867	4046729	3.25637	2.12493	0	1	1	0	1	1	0	0	0	4	1	1	1	0	0	0	1	4	1	CHEF
chr8	34732644	34733110	chr8	29301131	29303131	4041443	3.24833	1.25235	1	1	1	0	0	1	0	0	0	4	1	0	1	0	0	0	0	2	1	CHEF
chr2	152728234	152728634	chr20	30181926	30183926	1025674	3.24626	4.74382	0	1	0	0	0	0	0	0	0	1	1	1	1	0	1	0	1	5	1	CHEF
chr15	25779787	25780187	chr5	16702014	16704014	1014773	3.23427	4.31891	0	0	1	0	0	0	0	0	0	1	0	1	1	0	1	0	1	4	1	CHEF
chr9	107630533	107630988	chr3	50277711	50279711	5045654	3.23062	3.80167	1	1	1	0	1	1	0	0	0	5	1	1	0	0	1	1	1	5	1	CHEF
chr10	39736114	39736514	chr6	111799302	111801302	1003496	3.22619	0.730148	0	0	0	0	0	0	0	0	1	1	0	1	1	0	1	0	1	4	1	CHEF
chr17	85256844	85257337	chr2	44770599	44772599	2020051	3.21675	3.33621	0	1	1	0	0	0	0	0	0	2	0	1	1	0	1	0	1	4	1	CHEF
chr14	59736939	59737404	chr13	26484387	26486387	3013777	3.21454	4.76934	1	1	1	0	0	0	0	0	0	3	1	1	1	0	1	0	1	5	1	CHEF
chr14	34453765	34454176	chr10	88627224	88629224	2013439	3.21172	6.43716	1	1	0	0	0	0	0	0	0	2	1	1	0	0	1	1	1	5	1	CHEF
chr1	64305324	64305724	chr2	208198486	208200486	1000776	3.2011	5.03188	0	0	1	0	0	0	0	0	0	1	0	1	1	1	1	0	0	4	1	CHEF
chr1	4972249	4972764	chr8	54815408	54817408	4000028	3.19835	2.10163	1	1	1	1	0	0	0	0	0	4	1	0	1	0	0	0	0	2	1	CHEF
chr17	29187118	29187602	chr6	36744359	36746359	3018738	3.19801	1.81605	1	1	1	0	0	0	0	0	0	3	1	0	0	1	0	0	0	2	1	CHEF
chr8	87831601	87832001	chr16	49729631	49731631	1042431	3.1964	4.75544	0	0	0	0	0	1	0	0	0	1	0	0	1	0	0	0	1	2	1	CHEF
chr7	34798682	34799605	chr19	34128432	34130432	4038666	3.19489	3.52432	1	1	1	0	0	1	0	0	0	4	0	1	1	0	1	0	1	4	1	CHEF
chr19	41850614	41851089	chr10	99096727	99098727	2022516	3.19389	4.75982	0	1	1	0	0	0	0	0	0	2	1	1	1	0	0	0	1	4	1	CHEF
chr10	120475141	120475992	chr12	66218546	66220546	2005173	3.1912	7.43449	0	0	1	0	0	1	0	0	0	2	0	0	0	0	0	0	0	0	1	CHEF
chr15	73067298	73067965	chr8	141473634	141475634	3015264	3.18508	2.44492	0	0	1	0	1	1	0	0	0	3	0	0	1	1	0	0	0	2	1	CHEF
chr2	65931708	65932108	chr2	166429655	166431655	1024228	3.18508	1.70392	0	0	1	0	0	0	0	0	0	1	1	0	0	0	0	0	1	2	1	CHEF
chr11	61529092	61529808	chr17	19219723	19221723	3006658	3.18007	2.08208	1	0	1	0	0	0	0	0	1	3	1	0	0	0	0	0	0	1	1	CHEF
chr4	148890862	148891281	chr1	10763808	10765808	3031846	3.17671	2.09886	1	0	1	0	0	1	0	0	0	3	1	0	0	1	0	0	1	3	1	CHEF
chr14	25604778	25605185	chr10	80999328	81001328	3013254	3.17582	1.63294	1	1	1	0	0	0	0	0	0	3	1	1	1	0	1	1	1	6	1	CHEF
chr12	15814523	15814942	chr2	12858127	12860127	1009390	3.17321	2.65713	0	1	0	0	0	0	0	0	0	1	0	1	1	0	1	0	1	4	1	CHEF
chr7	79818349	79818760	chr15	90325852	90327852	2039428	3.17054	1.67562	1	1	0	0	0	0	0	0	0	2	0	0	0	0	0	0	1	1	1	CHEF
chr12	85485961	85486391	chr14	75760099	75762099	2010349	3.16923	3.35237	0	0	1	0	0	1	0	0	0	2	0	0	1	0	0	1	1	3	1	CHEF
chr6	144361254	144361769	chr12	24285525	24287525	6037668	3.16618	1.08442	1	1	1	1	0	0	1	0	1	6	1	1	1	0	1	0	1	5	1	CHEF
chr8	36155369	36156126	chr8	8166919	8168919	4041478	3.15931	1.57661	1	1	1	0	0	1	0	0	0	4	0	0	1	0	0	0	0	1	1	CHEF
chr10	79840692	79841410	chr19	781784	783784	5004337	3.1557	4.61593	1	0	1	1	1	1	0	0	0	5	1	1	1	0	1	1	1	6	1	CHEF
chr18	9214641	9215322	chr10	35927264	35929264	4020273	3.15425	2.45911	1	1	1	0	0	1	0	0	0	4	1	0	1	0	0	0	1	3	1	CHEF
chr13	57362521	57362983	chr5	136226529	136228529	3012041	3.1503	1.57803	1	1	1	0	0	0	0	0	0	3	1	1	1	0	0	0	1	4	1	CHEF
chr3	37758017	37758549	chr4	124520256	124522256	4027197	3.14233	2.6404	1	1	0	1	0	0	0	0	1	4	0	0	1	0	1	0	0	2	1	CHEF
chr17	4947058	4947458	chr6	157041214	157043214	1018079	3.12066	2.75837	0	0	0	0	0	0	0	0	1	1	1	1	0	0	0	0	0	2	1	CHEF
chr15	84853273	84853988	chr22	45402145	45404145	2015872	3.11069	4.49544	0	0	1	0	0	1	0	0	0	2	0	0	1	0	0	0	1	2	1	CHEF
chr6	67230226	67230626	chr1	67923840	67925840	1036254	3.11044	2.45252	0	0	1	0	0	0	0	0	0	1	1	0	1	0	1	0	1	4	1	CHEF
chr12	79035333	79035794	chr14	68005056	68007056	4010147	3.10823	1.25303	0	1	1	1	0	0	0	0	1	4	0	0	1	0	0	0	0	1	1	CHEF
chr9	118389804	118390227	chr3	27926427	27928427	3045958	3.09056	1.50276	1	1	1	0	0	0	0	0	0	3	0	0	1	0	0	0	0	1	1	CHEF
chr13	63094823	63095343	chr9	97586906	97588906	3012137	3.08709	1.6603	1	1	1	0	0	0	0	0	0	3	1	1	1	0	1	0	1	5	1	CHEF
chr5	75084964	75085693	chr4	54974641	54976641	6033215	3.08555	1.44753	1	1	1	1	1	1	0	0	0	6	1	1	1	0	1	0	1	5	1	CHEF
chr15	89477232	89478195	chr22	51079259	51081259	2016021	3.08555	2.15093	1	0	0	1	0	0	0	0	0	2	1	1	1	0	0	0	1	4	1	CHEF
chr1	11748453	11748888	chr8	69552376	69554376	3000110	3.08475	4.45286	1	1	1	0	0	0	0	0	0	3	1	1	1	0	1	0	1	5	1	CHEF
chr12	33344861	33345274	chr7	105278841	105280841	2009604	3.07597	6.93476	1	1	0	0	0	0	0	0	0	2	1	1	1	0	1	0	1	5	1	CHEF
chr2	116060015	116060566	chr15	37386400	37388400	4024952	3.07526	2.02433	1	1	1	0	0	1	0	0	0	4	0	0	1	0	0	0	1	2	1	CHEF
chr16	44280842	44281244	chr3	113303891	113305891	2017519	3.06646	0.955112	1	1	0	0	0	0	0	0	0	2	0	0	1	0	0	0	0	1	1	CHEF
chr18	35757419	35758063	chr5	138902841	138904841	6020659	3.0542	4.26607	1	1	1	1	0	0	1	0	1	6	1	1	1	0	1	0	1	5	1	CHEF
chr5	142800632	142801074	chr7	5446317	5448317	5035106	3.05335	3.45708	1	1	1	1	0	0	0	0	1	5	1	1	1	0	1	0	1	5	1	CHEF
chr1	74816846	74817326	chr2	219773000	219775000	2000961	3.04823	1.99262	0	0	1	0	0	1	0	0	0	2	0	0	0	1	0	1	1	3	1	CHEF
chr9	42857720	42858163	chr11	120480668	120482668	4044145	3.04592	1.12921	1	0	0	1	0	0	1	1	0	4	0	0	0	0	0	0	1	1	1	CHEF
chr13	75765716	75766635	chr5	95230343	95232343	3012324	3.04168	2.19977	1	1	1	0	0	0	0	0	0	3	0	1	1	0	1	0	1	4	1	CHEF
chr1	62181620	62182107	chr2	206003898	206005898	5000733	3.03923	2.9255	1	1	1	1	0	0	1	0	0	5	0	0	1	0	1	0	0	2	1	CHEF
chr9	121332253	121332653	chr3	42083898	42085898	1046070	3.03149	4.51998	0	0	0	1	0	0	0	0	0	1	1	1	1	0	0	0	0	3	1	CHEF
chr2	60871007	60871457	chr2	161253326	161255326	2024178	3.03092	2.01247	0	0	0	1	0	0	0	0	1	2	0	0	1	0	1	0	0	2	1	CHEF
chr13	89741166	89741566	chr5	82767553	82769553	1012412	3.02896	7.01476	0	0	1	0	0	0	0	0	0	1	0	0	0	0	0	0	0	0	1	CHEF
chr5	44754163	44754901	chr4	16847236	16849236	4032869	3.02415	5.4573	1	1	1	1	0	0	0	0	0	4	1	1	1	0	1	0	0	4	1	CHEF
chr11	34315355	34315834	chr5	169405655	169407655	4006071	3.0209	1.79596	1	1	1	0	0	0	0	0	1	4	0	0	1	0	1	0	1	3	1	CHEF
chr10	18445975	18446391	chr6	138847685	138849685	2003167	3.00865	2.05235	1	1	0	0	0	0	0	0	0	2	0	0	0	0	1	0	1	2	1	CHEF
chr10	96309020	96309546	chr12	92859340	92861340	2004896	3.00454	2.47499	0	1	0	0	0	0	0	0	1	2	1	0	1	0	1	0	1	4	1	CHEF
chr10	18422867	18423402	chr6	138875719	138877719	5003165	3.00292	2.09583	1	1	1	1	1	0	0	0	0	5	1	0	0	0	1	0	1	3	1	CHEF
chr14	99313042	99313503	chr13	73648983	73650983	2014278	2.9993	2.81332	0	0	1	0	0	1	0	0	0	2	1	1	1	0	1	0	1	5	1	CHEF
chr9	65201724	65202124	chr15	65587266	65589266	1044886	2.99598	2.76395	0	1	0	0	0	0	0	0	0	1	0	0	1	1	1	1	0	4	1	CHEF
chr13	101801255	101801706	chr5	67482784	67484784	4012702	2.99077	2.8201	1	1	1	0	0	0	0	0	1	4	1	1	1	0	1	0	1	5	1	CHEF
chr13	40853340	40853755	chr6	10521837	10523837	2011556	2.98713	2.7804	0	0	0	1	0	0	0	0	1	2	0	0	0	0	1	0	1	2	1	CHEF
chr2	152737343	152737973	chr20	30193567	30195567	2025677	2.98648	6.66781	0	1	1	0	0	0	0	0	0	2	0	0	0	0	0	0	1	1	1	CHEF
chr4	58720586	58721038	chr9	114012885	114014885	3029632	2.9772	1.18348	1	1	1	0	0	0	0	0	0	3	1	0	0	0	1	0	0	2	1	CHEF
chr1	180387401	180387873	chr1	226866842	226868842	2002627	2.96115	1.09055	0	0	1	0	0	1	0	0	0	2	0	0	1	1	1	1	1	5	1	CHEF
chr16	77400501	77400942	chr21	17651764	17653764	2017736	2.95882	1.61277	0	1	1	0	0	0	0	0	0	2	1	0	1	0	1	0	0	3	1	CHEF
chr10	130293696	130294136	chr12	55391143	55393143	3005424	2.9576	2.61011	1	1	0	0	0	0	0	1	0	3	1	1	1	0	0	0	0	3	1	CHEF
chr2	45117007	45117542	chr2	145281004	145283004	4024014	2.94861	2.33146	1	1	1	0	0	1	0	0	0	4	0	0	0	0	1	0	1	2	1	CHEF
chr3	149085135	149085583	chr1	82147517	82149517	2028741	2.94094	3.33208	0	1	0	1	0	0	0	0	0	2	0	1	1	0	1	0	1	4	1	CHEF
chr13	89739221	89739719	chr5	82769467	82771467	2012411	2.94069	6.68137	0	0	1	0	0	1	0	0	0	2	0	0	0	0	1	0	0	1	1	CHEF
chr3	147963650	147964054	chr1	83312942	83314942	2028731	2.92685	3.78411	1	1	0	0	0	0	0	0	0	2	1	0	0	0	1	0	0	2	1	CHEF
chr3	103683124	103683950	chr1	114574985	114576985	3028141	2.92454	7.32151	1	0	1	1	0	0	0	0	0	3	0	0	0	0	1	0	0	1	1	CHEF
chr4	140103657	140104079	chr1	18620402	18622402	2031542	2.92169	6.76044	1	1	0	0	0	0	0	0	0	2	1	0	1	0	1	0	0	3	1	CHEF
chr13	107831092	107831539	chr5	60703717	60705717	2012769	2.91407	1.67353	0	0	1	0	0	1	0	0	0	2	0	0	0	0	1	0	1	2	1	CHEF
chr18	80982153	80983008	chr18	76742921	76744921	3021518	2.91365	4.73009	1	1	1	0	0	0	0	0	0	3	1	1	1	0	1	0	1	5	1	CHEF
chr17	47976607	47977007	chr6	41469349	41471349	1019433	2.91192	1.27313	0	0	0	1	0	0	0	0	0	1	0	0	1	0	0	0	1	2	1	CHEF
chr18	54911321	54911735	chr5	123996270	123998270	2020997	2.91005	4.2653	0	1	1	0	0	0	0	0	0	2	1	0	1	0	1	0	1	4	1	CHEF
chr19	37881312	37881886	chr10	95039732	95041732	4022434	2.9041	9.11134	1	1	1	0	0	0	0	0	1	4	1	1	1	0	1	0	1	5	1	CHEF
chr1	186922730	186923184	chr1	218207008	218209008	4002779	2.8998	2.0195	1	1	1	1	0	0	0	0	0	4	1	1	1	0	1	0	1	5	1	CHEF
chr5	140610653	140612272	chr7	2562949	2564949	5035039	2.89901	4.95109	1	1	1	1	0	1	0	0	0	5	1	1	1	0	1	1	1	6	1	CHEF
chr1	133080214	133080614	chr1	204423421	204425421	1001774	2.89443	2.29782	0	1	0	0	0	0	0	0	0	1	1	1	1	0	0	0	1	4	1	CHEF
chr9	92260878	92261299	chr3	146248201	146250201	3045323	2.8829	1.57018	1	1	1	0	0	0	0	0	0	3	0	0	0	0	0	0	1	1	1	CHEF
chr14	26605245	26605645	chr3	57644324	57646324	1013274	2.88151	2.4875	0	0	0	1	0	0	0	0	0	1	0	0	1	0	1	0	0	2	1	CHEF
chrX	128576459	128576888	chrX	95019373	95021373	2046814	2.87886	1.60722	1	1	0	0	0	0	0	0	0	2	1	1	1	0	1	0	0	4	1	CHEF
chr12	75844308	75844721	chr14	64357056	64359056	2010076	2.87379	5.12781	1	1	0	0	0	0	0	0	0	2	1	1	1	0	1	0	1	5	1	CHEF
chrX	59493338	59493778	chrX	138204028	138206028	2046493	2.87167	0.795733	0	1	1	0	0	0	0	0	0	2	1	0	1	0	0	0	0	2	1	CHEF
chr18	5819692	5820099	chr10	31891517	31893517	2020241	2.8681	2.22192	0	0	1	0	0	1	0	0	0	2	0	0	0	0	1	1	1	3	1	CHEF
chr6	32706431	32706882	chr7	132371886	132373886	2035743	2.86728	1.44027	0	1	1	0	0	0	0	0	0	2	0	0	1	0	0	0	0	1	1	CHEF
chr2	73142888	73143288	chr2	174988179	174990179	1024399	2.8522	3.9368	0	1	0	0	0	0	0	0	0	1	0	0	1	0	1	0	1	3	1	CHEF
chr17	47440548	47440948	chr6	42104210	42106210	1019364	2.84784	4.98612	0	0	0	0	0	0	0	0	1	1	1	0	0	0	1	0	1	3	1	CHEF
chr15	59391849	59392333	chr8	126131923	126133923	5015158	2.84559	1.32302	1	1	1	1	0	0	0	0	1	5	1	0	1	0	1	0	0	3	1	CHEF
chr6	120539048	120539738	chr22	17651715	17653715	2037183	2.83329	5.95644	0	0	1	1	0	0	0	0	0	2	1	0	0	0	0	1	0	2	1	CHEF
chrX	133673759	133674200	chrX	99649160	99651160	3046821	2.83112	1.29035	1	1	1	0	0	0	0	0	0	3	1	0	1	0	0	0	1	3	1	CHEF
chr14	20891949	20892349	chr10	75725088	75727088	1013165	2.82529	8.9281	0	0	1	0	0	0	0	0	0	1	1	0	1	0	1	0	1	4	1	CHEF
chr9	46581812	46582525	chr11	116315567	116317567	4044305	2.82406	6.04176	1	1	1	0	0	0	0	0	1	4	1	1	1	0	1	0	1	5	1	CHEF
chr13	111936198	111936598	chr5	55964797	55966797	1012840	2.81237	2.06148	0	0	0	1	0	0	0	0	0	1	0	0	1	0	0	0	1	2	1	CHEF
chr17	85149194	85149634	chr2	44656565	44658565	2020047	2.80777	3.42095	0	1	1	0	0	0	0	0	0	2	1	1	1	0	1	0	1	5	1	CHEF
chr8	108729191	108729591	chr16	73066461	73068461	2042893	2.80502	0.953381	1	1	0	0	0	0	0	0	0	2	1	0	1	0	1	0	1	4	1	CHEF
chr11	43653113	43653562	chr5	159586203	159588203	2006151	2.79888	4.22443	0	0	1	0	1	0	0	0	0	2	0	0	0	0	1	0	1	2	1	CHEF
chr10	37377908	37378337	chr6	113907702	113909702	2003470	2.79874	4.7471	1	1	0	0	0	0	0	0	0	2	1	1	1	0	1	0	0	4	1	CHEF
chr1	152069901	152070856	chr1	184377146	184379146	4002077	2.79655	1.54012	1	1	1	0	0	1	0	0	0	4	0	0	0	0	0	0	1	1	1	CHEF
chr13	91370812	91371212	chr5	81146834	81148834	1012431	2.79534	6.45521	0	0	1	0	0	0	0	0	0	1	1	0	1	0	0	0	1	3	1	CHEF
chr8	108729847	108730274	chr16	73065628	73067628	3042894	2.79068	0.754192	1	1	1	0	0	0	0	0	0	3	1	0	1	0	1	0	1	4	1	CHEF
chr12	107979814	107980752	chr14	99711471	99713471	3010739	2.78697	7.25031	0	0	1	1	0	1	0	0	0	3	1	0	0	0	0	0	0	1	1	CHEF
chr10	59964452	59965400	chr10	74019528	74021528	2003812	2.78697	4.99363	0	0	1	1	0	0	0	0	0	2	1	0	0	1	1	0	1	4	1	CHEF
chr11	98298817	98299221	chr17	37735155	37737155	2008074	2.78328	2.53725	0	1	1	0	0	0	0	0	0	2	0	0	1	0	0	0	0	1	1	CHEF
chr3	87974284	87974748	chr1	156642663	156644663	3027672	2.78022	3.96745	1	1	1	0	0	0	0	0	0	3	1	1	1	0	1	0	0	4	1	CHEF
chr1	77496849	77497300	chr2	222419122	222421122	1001052	2.77688	1.89082	1	0	0	0	0	0	0	0	0	1	1	0	0	0	1	0	1	3	1	CHEF
chr6	38730392	38730823	chr7	139297734	139299734	2035850	2.77279	2.25987	1	1	0	0	0	0	0	0	0	2	1	0	0	0	1	0	0	2	1	CHEF
chr14	118416067	118416609	chr13	95599414	95601414	3014425	2.77058	2.03997	0	1	1	0	1	0	0	0	0	3	1	1	1	0	1	0	1	5	1	CHEF
chr14	12821756	12822395	chr3	62859015	62861015	2013055	2.76956	5.00981	0	0	1	0	0	1	0	0	0	2	0	0	0	0	1	1	1	3	1	CHEF
chr19	58969079	58969583	chr10	118638639	118640639	4023000	2.76782	1.17645	0	1	1	0	0	1	1	0	0	4	0	0	1	0	1	0	1	3	1	CHEF
chr19	42409845	42410333	chr10	99765913	99767913	3022550	2.76388	1.25353	1	1	1	0	0	0	0	0	0	3	1	1	0	0	0	0	0	2	1	CHEF
chr5	137102924	137103324	chr7	100742618	100744618	1034880	2.7591	3.39975	0	0	1	0	0	0	0	0	0	1	0	0	1	0	0	0	1	2	1	CHEF
chr15	7531254	7531668	chr5	38103741	38105741	3014610	2.75668	2.65779	1	1	0	1	0	0	0	0	0	3	0	1	1	0	1	0	1	4	1	CHEF
chr2	109936243	109936730	chr11	27472187	27474187	2024896	2.74475	1.93056	0	1	1	0	0	0	0	0	0	2	0	0	1	0	0	0	0	1	1	CHEF
chr7	70625324	70625753	chr15	96595637	96597637	1039291	2.74024	1.4112	0	0	0	0	0	1	0	0	0	1	0	0	0	0	1	0	1	2	1	CHEF
chr3	17786503	17787498	chr8	65281774	65283774	4026900	2.73322	4.08516	1	1	1	0	0	1	0	0	0	4	1	1	1	0	1	0	1	5	1	CHEF
chr11	8723011	8723645	chr7	47711934	47713934	3005672	2.73108	1.38162	1	1	1	0	0	0	0	0	0	3	1	0	1	0	0	0	1	3	1	CHEF
chr12	12987390	12987838	chr2	16035350	16037350	3009375	2.72907	1.11943	1	1	1	0	0	0	0	0	0	3	0	0	0	0	0	0	1	1	1	CHEF
chr13	107828785	107829239	chr5	60710901	60712901	3012768	2.72872	2.50507	1	1	1	0	0	0	0	0	0	3	0	0	0	0	0	0	1	1	1	CHEF
chr13	44755476	44755924	chr6	15267935	15269935	2011681	2.72259	3.16123	1	0	1	0	0	0	0	0	0	2	0	1	1	0	1	0	1	4	1	CHEF
chr13	40649025	40649565	chr6	10313778	10315778	3011539	2.71664	2.0406	0	0	0	0	1	1	0	0	1	3	1	1	0	0	0	0	0	2	1	CHEF
chr13	44020811	44021211	chr6	14381806	14383806	1011645	2.70875	8.99144	0	0	1	0	0	0	0	0	0	1	0	0	0	0	0	0	0	0	1	CHEF
chr15	102692743	102693327	chr12	54088351	54090351	4016483	2.70873	1.85191	1	1	1	0	0	1	0	0	0	4	1	0	0	0	0	0	0	1	1	CHEF
chr11	47640487	47640973	chr5	155461820	155463820	6006217	2.6999	0.926214	1	1	1	1	0	0	1	1	0	6	0	0	0	0	0	0	1	1	1	CHEF
chr5	115373832	115374395	chr12	120850947	120852947	4034014	2.69408	2.46051	1	1	1	0	0	1	0	0	0	4	1	1	1	0	0	0	1	4	1	CHEF
chr4	117210693	117211093	chr1	45195920	45197920	1030333	2.68452	4.01552	0	1	0	0	0	0	0	0	0	1	1	0	1	0	1	0	1	4	1	CHEF
chr19	42409147	42409547	chr10	99765169	99767169	1022549	2.68279	1.06906	0	0	1	0	0	0	0	0	0	1	1	1	0	0	0	0	0	2	1	CHEF
chr7	79139385	79139788	chr15	89446451	89448451	2039385	2.67564	1.72938	1	1	0	0	0	0	0	0	0	2	0	0	0	0	0	0	1	1	1	CHEF
chr9	71763315	71763738	chr15	57677351	57679351	5045049	2.66144	4.63341	1	1	1	1	0	0	1	0	0	5	0	0	1	0	1	0	0	2	1	CHEF
chr7	73400196	73400684	chr15	93604031	93606031	3039323	2.65789	3.95444	1	1	1	0	0	0	0	0	0	3	1	1	1	0	1	0	1	5	1	CHEF
chr16	78265166	78265591	chr21	18838955	18840955	3017743	2.65671	1.78662	1	1	1	0	0	0	0	0	0	3	1	0	1	0	0	0	1	3	1	CHEF
chr17	85142609	85143089	chr2	44647086	44649086	1020045	2.65357	1.03299	0	0	1	0	0	0	0	0	0	1	0	1	1	0	1	0	1	4	1	CHEF
chr3	95864774	95865184	chr1	150274063	150276063	2027913	2.65312	3.59855	0	0	1	1	0	0	0	0	0	2	1	0	1	0	1	0	1	4	1	CHEF
chr6	66464437	66464869	chr4	121079094	121081094	2036240	2.64455	1.60892	1	1	0	0	0	0	0	0	0	2	1	0	0	0	1	0	0	2	1	CHEF
chr2	152739334	152739743	chr20	30195448	30197448	1025678	2.64384	4.60406	0	0	0	0	0	1	0	0	0	1	0	0	0	1	1	0	1	3	1	CHEF
chr13	40649831	40650290	chr6	10314571	10316571	2011540	2.64192	2.29678	1	1	0	0	0	0	0	0	0	2	1	1	1	0	1	0	1	5	1	CHEF
chr19	50440441	50440856	chr10	108672234	108674234	2022840	2.64184	2.05796	1	1	0	0	0	0	0	0	0	2	0	0	0	0	1	0	1	2	1	CHEF
chr5	125589417	125589819	chr12	125764671	125766671	2034511	2.64182	2.84339	0	0	0	0	1	0	0	0	1	2	1	1	1	0	0	0	1	4	1	CHEF
chr3	37657015	37657515	chr4	124338743	124340743	2027191	2.63366	6.21337	0	1	1	0	0	0	0	0	0	2	0	1	1	0	1	0	1	4	1	CHEF
chr6	30180285	30180685	chr7	129426183	129428183	1035673	2.62898	0.626368	0	0	0	0	1	0	0	0	0	1	0	0	1	0	0	0	1	2	1	CHEF
chr1	132333848	132334248	chr1	205269496	205271496	1001739	2.62863	5.92381	0	0	0	0	0	0	0	0	1	1	1	1	1	1	1	1	1	7	1	CHEF
chr5	142415393	142415795	chr7	4746039	4748039	1035072	2.62348	1.99262	0	0	1	0	0	0	0	0	0	1	1	1	1	0	1	0	1	5	1	CHEF
chr7	132809274	132809743	chr10	126427416	126429416	2040520	2.61925	2.29656	1	1	0	0	0	0	0	0	0	2	1	0	0	0	0	0	1	2	1	CHEF
chr11	101479283	101479691	chr17	41187472	41189472	3008263	2.61887	2.62373	1	1	1	0	0	0	0	0	0	3	1	1	1	0	1	0	0	4	1	CHEF
chr16	91029276	91029804	chr21	34125551	34127551	2017856	2.61838	0.815276	0	0	1	0	0	0	0	0	1	2	1	1	1	0	1	0	1	5	1	CHEF
chr7	73399313	73399823	chr15	93605143	93607143	5039322	2.61826	3.29847	1	1	1	1	0	0	0	1	0	5	0	0	0	0	0	0	0	0	1	CHEF
chr14	57537143	57537585	chr13	21290049	21292049	3013735	2.61465	1.12137	1	1	1	0	0	0	0	0	0	3	0	0	1	0	0	0	0	1	1	CHEF
chr12	44492759	44493232	chr7	107930289	107932289	3009687	2.6113	1.32805	1	1	1	0	0	0	0	0	0	3	0	0	1	0	0	0	0	1	1	CHEF
chr12	99298880	99299280	chr14	89760109	89762109	1010519	2.61014	7.3168	0	0	1	0	0	0	0	0	0	1	0	0	0	0	0	0	0	0	1	CHEF
chr7	101676905	101677352	chr11	72128023	72130023	2039849	2.60746	3.45051	1	1	0	0	0	0	0	0	0	2	1	1	1	0	1	1	1	6	1	CHEF
chr10	120552874	120553603	chr12	66134424	66136424	2005180	2.59996	3.8378	0	0	0	0	0	1	0	0	1	2	0	0	0	0	1	0	1	2	1	CHEF
chr5	140583858	140584310	chr7	2538683	2540683	3035036	2.59413	2.33783	1	1	1	0	0	0	0	0	0	3	0	0	0	0	1	0	0	1	1	CHEF
chr1	121087088	121087823	chr2	119075835	119077835	3001595	2.59244	7.92164	1	1	0	1	0	0	0	0	0	3	1	1	1	0	1	0	1	5	1	CHEF
chr3	145632924	145633324	chr1	86072143	86074143	1028692	2.57795	3.2125	0	0	0	1	0	0	0	0	0	1	1	0	1	0	1	0	1	4	1	CHEF
chr8	70792225	70792635	chr19	18227845	18229845	1041942	2.57517	1.6524	0	0	0	0	0	1	0	0	0	1	0	0	0	1	0	1	1	3	1	CHEF
chr7	118992468	118993264	chr16	19892809	19894809	3040155	2.5735	4.55005	1	1	0	1	0	0	0	0	0	3	1	1	1	0	1	0	1	5	1	CHEF
chr2	20394117	20394556	chr10	24384470	24386470	2023290	2.57291	1.37501	1	0	0	1	0	0	0	0	0	2	0	0	1	0	1	0	0	2	1	CHEF
chr10	43742582	43743087	chr6	107195762	107197762	4003622	2.56783	2.34587	1	1	1	1	0	0	0	0	0	4	1	1	1	0	1	0	1	5	1	CHEF
chr17	27501706	27502145	chr6	34098892	34100892	3018597	2.5664	5.55997	1	1	1	0	0	0	0	0	0	3	1	0	1	0	0	0	1	3	1	CHEF
chr14	76622508	76622908	chr13	44880426	44882426	1014102	2.55987	1.11653	0	0	0	1	0	0	0	0	0	1	0	0	0	0	1	0	1	2	1	CHEF
chr13	114050585	114051011	chr5	53314217	53316217	2012909	2.55898	6.30823	0	1	1	0	0	0	0	0	0	2	0	0	1	0	0	0	0	1	1	CHEF
chr17	62939917	62940317	chr5	107079243	107081243	1019646	2.55547	2.42471	0	1	0	0	0	0	0	0	0	1	0	0	1	0	0	0	1	2	1	CHEF
chr9	64339286	64339740	chr15	66586443	66588443	2044848	2.54931	1.96902	1	1	0	0	0	0	0	0	0	2	0	0	0	0	0	0	1	1	1	CHEF
chr1	133418186	133418599	chr1	204048717	204050717	1001796	2.54233	7.46777	0	0	0	0	0	1	0	0	0	1	0	0	1	0	0	0	0	1	1	CHEF
chr3	127459849	127460249	chr4	113671863	113673863	1028454	2.54014	10.6209	1	0	0	0	0	0	0	0	0	1	0	0	0	0	1	0	0	1	1	CHEF
chr5	74998976	74999496	chr4	54866939	54868939	4033209	2.53884	1.82261	1	1	1	0	0	0	0	0	1	4	1	0	1	0	0	0	0	2	1	CHEF
chr2	152729075	152729685	chr20	30182672	30184672	2025675	2.53647	4.88651	0	0	0	1	0	0	0	0	1	2	1	1	1	0	1	0	1	5	1	CHEF
chr6	141495534	141496013	chr12	20809577	20811577	4037610	2.53144	0.818288	1	1	1	0	0	0	0	0	1	4	0	0	0	0	1	0	0	1	1	CHEF
chr10	92163138	92163614	chr12	97857234	97859234	3004785	2.52208	5.15904	1	1	1	0	0	0	0	0	0	3	1	1	1	0	1	0	1	5	1	CHEF
chr18	13397209	13397639	chr18	22396633	22398633	2020358	2.51902	1.80048	1	1	0	0	0	0	0	0	0	2	1	0	0	0	0	0	0	1	1	CHEF
chr10	42071874	42072274	chr6	109101400	109103400	1003566	2.51682	2.82869	0	0	0	0	0	0	0	0	1	1	0	0	0	0	1	0	1	2	1	CHEF
chr8	92065517	92066052	chr16	54618277	54620277	2042547	2.51618	4.81493	0	1	0	0	0	0	0	0	1	2	0	1	1	0	0	0	1	3	1	CHEF
chr5	127338851	127339307	chr12	128867080	128869080	3034533	2.51461	0.806183	0	1	1	0	0	1	0	0	0	3	0	1	1	0	0	0	1	3	1	CHEF
chr11	68146548	68147125	chr17	9232414	9234414	3006805	2.51435	2.07961	0	1	1	0	0	1	0	0	0	3	1	1	1	0	0	0	1	4	1	CHEF
chr2	34249502	34249981	chr9	128651139	128653139	3023851	2.51395	1.29077	1	1	1	0	0	0	0	0	0	3	0	0	0	0	1	0	0	1	1	CHEF
chr9	62202280	62202732	chr15	69378049	69380049	4044740	2.51185	3.43734	0	0	0	1	1	1	0	0	1	4	1	1	1	0	1	0	1	5	1	CHEF
chr2	38917310	38917710	chr9	127522306	127524306	1023983	2.50942	2.41365	0	1	0	0	0	0	0	0	0	1	1	1	1	0	1	0	1	5	1	CHEF
chr8	48842873	48843429	chr4	183064933	183066933	2041655	2.5057	6.33797	0	0	1	0	0	1	0	0	0	2	0	0	0	0	1	0	1	2	1	CHEF
chr4	117484479	117485214	chr1	44882315	44884315	5030356	2.49944	2.20057	1	1	1	0	0	1	0	0	1	5	1	1	0	0	0	0	0	2	1	CHEF
chr6	145855636	145856069	chr12	26266554	26268554	2037714	2.49702	1.87887	0	0	1	0	0	1	0	0	0	2	0	0	0	1	1	0	1	3	1	CHEF
chr18	61398422	61399003	chr5	149110592	149112592	2021088	2.49296	1.93947	0	0	1	0	0	1	0	0	0	2	1	0	0	1	0	0	0	2	1	CHEF
chr1	75888460	75889217	chr2	220829475	220831475	4001030	2.48268	3.17404	1	1	1	0	0	0	0	0	1	4	1	1	1	0	1	0	1	5	1	CHEF
chr1	64916877	64917307	chr2	208834460	208836460	2000794	2.47346	4.949	0	1	1	0	0	0	0	0	0	2	1	1	1	0	1	0	1	5	1	CHEF
chr1	77512843	77513243	chr2	222433796	222435796	1001055	2.46226	1.14858	0	1	0	0	0	0	0	0	0	1	0	0	1	0	0	0	1	2	1	CHEF
chr15	86005664	86006468	chr22	46895378	46897378	2015929	2.462	1.34879	0	0	1	0	0	1	0	0	0	2	0	1	1	0	0	0	0	2	1	CHEF
chr16	42190105	42190537	chr3	115502476	115504476	2017482	2.45815	2.84403	0	0	1	0	0	1	0	0	0	2	0	0	0	0	1	0	1	2	1	CHEF
chr16	76539702	76540112	chr21	16593562	16595562	2017728	2.45784	1.08442	1	0	0	1	0	0	0	0	0	2	1	0	1	0	1	0	1	4	1	CHEF
chr6	66458373	66458773	chr4	121079341	121081341	1036239	2.4479	1.47505	0	1	0	0	0	0	0	0	0	1	1	0	0	0	1	0	0	2	1	CHEF
chr3	84645376	84645776	chr4	153620400	153622400	1027593	2.44654	3.20609	0	0	0	0	0	0	0	0	1	1	0	0	1	0	1	0	1	3	1	CHEF
chr8	80055870	80056289	chr4	145568347	145570347	3042179	2.44475	1.8209	1	1	1	0	0	0	0	0	0	3	0	0	1	0	1	0	0	2	1	CHEF
chr10	96733556	96733956	chr12	92414552	92416552	1004906	2.44368	2.29241	0	0	0	1	0	0	0	0	0	1	0	0	1	0	0	0	1	2	1	CHEF
chr3	9654396	9654852	chr8	81825024	81827024	3026820	2.44153	0.849649	1	1	1	0	0	0	0	0	0	3	0	1	1	0	0	0	1	3	1	CHEF
chr4	45513913	45514313	chr9	38046917	38048917	1029377	2.43362	3.27019	0	0	1	0	0	0	0	0	0	1	0	0	1	0	1	0	1	3	1	CHEF
chr17	15990220	15990679	chr5	97848294	97850294	3018308	2.4331	1.1754	1	1	0	1	0	0	0	0	0	3	1	0	1	0	0	0	0	2	1	CHEF
chr13	57603183	57603654	chr5	136490458	136492458	2012046	2.43156	0.858549	0	1	1	0	0	0	0	0	0	2	0	0	1	0	0	0	0	1	1	CHEF
chr14	118473763	118474652	chr13	95654587	95656587	4014427	2.41869	1.92393	1	1	1	0	0	1	0	0	0	4	0	0	0	0	0	0	1	1	1	CHEF
chr14	118737158	118737880	chr13	96006729	96008729	3014434	2.41673	1.02949	0	1	1	1	0	0	0	0	0	3	0	0	1	0	0	0	0	1	1	CHEF
chr11	110781659	110782104	chr17	67865305	67867305	3008635	2.4092	2.24192	1	1	1	0	0	0	0	0	0	3	0	0	0	0	1	0	0	1	1	CHEF
chr7	66283031	66283431	chr15	101586869	101588869	1039235	2.39968	1.21909	0	0	0	0	0	1	0	0	0	1	1	0	1	0	1	0	1	4	1	CHEF
chr7	109671493	109672152	chr11	8891427	8893427	3039941	2.39409	2.67511	0	0	1	0	0	1	0	0	1	3	0	0	0	0	1	0	1	2	1	CHEF
chr6	29788783	29789187	chr7	128897708	128899708	2035655	2.39141	2.75312	1	1	0	0	0	0	0	0	0	2	1	1	1	0	1	0	1	5	1	CHEF
chr4	124441799	124442419	chr1	38750693	38752693	2030600	2.39044	2.82869	1	0	1	0	0	0	0	0	0	2	1	0	0	0	0	0	1	2	1	CHEF
chr12	12581805	12582205	chr2	16510348	16512348	1009345	2.38713	1.52024	1	0	0	0	0	0	0	0	0	1	1	0	0	0	0	0	1	2	1	CHEF
chr17	87601574	87601974	chr2	47561134	47563134	1020128	2.37969	3.11392	0	1	0	0	0	0	0	0	0	1	0	1	0	0	1	0	0	2	1	CHEF
chr5	96964504	96964904	chr4	79642393	79644393	1033425	2.37969	1.61938	0	0	1	0	0	0	0	0	0	1	1	1	1	0	0	0	1	4	1	CHEF
chr14	25317784	25318407	chr10	80672579	80674579	4013238	2.37862	1.59574	1	1	1	0	0	1	0	0	0	4	1	1	1	0	0	0	0	3	1	CHEF
chr1	192834635	192835103	chr1	210423926	210425926	4002912	2.372	3.60398	1	1	1	0	0	1	0	0	0	4	1	1	0	0	0	0	1	3	1	CHEF
chr17	48504898	48505298	chr6	40964353	40966353	1019452	2.36762	6.92369	0	0	1	0	0	0	0	0	0	1	1	1	1	0	1	0	1	5	1	CHEF
chr3	26920748	26921378	chr3	172635117	172637117	3026981	2.36592	1.46266	1	1	1	0	0	0	0	0	0	3	0	0	0	0	0	0	1	1	1	CHEF
chr2	146921114	146921579	chr20	21170048	21172048	3025542	2.35967	6.03117	1	1	1	0	0	0	0	0	0	3	1	1	1	0	1	0	1	5	1	CHEF
chr14	65245356	65245756	chr8	28370454	28372454	1013898	2.34046	2.69912	0	1	0	0	0	0	0	0	0	1	1	1	1	0	1	0	1	5	1	CHEF
chr5	32850986	32851386	chr22	32142544	32144544	1032633	2.33978	2.60979	0	1	0	0	0	0	0	0	0	1	0	1	1	0	1	0	1	4	1	CHEF
chr11	108909389	108909789	chr17	63568058	63570058	1008596	2.33429	6.07033	0	0	0	1	0	0	0	0	0	1	1	1	1	1	1	0	1	6	1	CHEF
chr11	44767233	44767772	chr5	158378204	158380204	4006175	2.32793	0.846345	1	1	1	0	0	0	0	0	1	4	0	0	1	0	1	0	1	3	1	CHEF
chr6	93849185	93849672	chr3	65524389	65526389	2036740	2.32655	2.44041	1	1	0	0	0	0	0	0	0	2	1	1	1	0	1	0	1	5	1	CHEF
chr19	7421929	7422506	chr11	63530761	63532761	2021909	2.3214	7.33323	0	0	1	0	0	1	0	0	0	2	0	0	0	0	0	0	0	0	1	CHEF
chr8	32293091	32293836	chr8	32077082	32079082	3041369	2.31821	1.0268	0	0	1	1	0	1	0	0	0	3	1	1	1	0	1	0	1	5	1	CHEF
chr11	103809148	103809691	chr17	44848967	44850967	3008420	2.31074	3.00518	1	1	1	0	0	0	0	0	0	3	1	1	1	0	1	0	1	5	1	CHEF
chr2	168838715	168839192	chr20	50574767	50576767	3026345	2.31005	2.93371	1	1	1	0	0	0	0	0	0	3	1	1	1	0	1	0	1	5	1	CHEF
chr3	149405815	149406239	chr1	81815486	81817486	2028752	2.30988	3.28704	1	1	0	0	0	0	0	0	0	2	0	0	0	0	0	0	1	1	1	CHEF
chrX	52199874	52200274	chrX	132588025	132590025	1046436	2.30345	6.07274	0	0	0	0	0	0	0	0	1	1	0	0	0	0	1	0	0	1	1	CHEF
chr15	52967694	52968314	chr8	118724836	118726836	5015062	2.30092	3.08131	1	1	1	0	1	1	0	0	0	5	1	0	1	0	0	0	0	2	1	CHEF
chr3	127463714	127464124	chr4	113667623	113669623	3028455	2.29465	6.26753	1	1	1	0	0	0	0	0	0	3	1	1	1	0	1	0	1	5	1	CHEF
chr5	148647605	148648005	chr13	30517096	30519096	1035331	2.29316	1.59535	0	0	0	0	0	0	0	0	1	1	1	1	1	0	0	0	1	4	1	CHEF
chr5	132728637	132729108	chr7	68813348	68815348	2034678	2.29256	1.09241	0	1	1	0	0	0	0	0	0	2	1	1	1	0	0	0	1	4	1	CHEF
chr2	105616354	105616794	chr11	31891808	31893808	3024854	2.29242	1.49138	1	1	1	0	0	0	0	0	0	3	1	0	0	0	0	0	0	1	1	CHEF
chr11	115699226	115699626	chr17	73388919	73390919	1008780	2.28801	3.95878	0	0	1	0	0	0	0	0	0	1	0	0	1	0	0	0	1	2	1	CHEF
chr18	55190063	55190733	chr5	124315299	124317299	5021002	2.28695	5.62485	1	1	1	0	0	1	0	0	1	5	1	1	1	0	1	0	1	5	1	CHEF
chr5	131531718	131532173	chr7	70164435	70166435	3034659	2.28553	3.63183	1	1	1	0	0	0	0	0	0	3	1	1	1	0	1	0	1	5	1	CHEF
chr6	93131245	93131684	chr3	64851084	64853084	2036726	2.28075	1.12052	1	1	0	0	0	0	0	0	0	2	1	0	1	0	1	0	1	4	1	CHEF
chr2	77411540	77412214	chr2	180306914	180308914	4024518	2.28065	3.26401	0	0	1	1	1	1	0	0	0	4	0	0	1	1	1	0	1	4	1	CHEF
chr4	105159214	105159652	chr1	57041957	57043957	2030056	2.27951	3.16569	1	1	0	0	0	0	0	0	0	2	1	0	1	0	1	0	0	3	1	CHEF
chr6	28761879	28762821	chr7	127588661	127590661	2035610	2.2791	1.12921	0	1	1	0	0	0	0	0	0	2	0	0	1	0	1	0	0	2	1	CHEF
chr8	12430341	12430741	chr13	112757677	112759677	1041045	2.27309	1.36537	0	0	0	0	0	1	0	0	0	1	0	0	1	0	1	0	0	2	1	CHEF
chr17	15382173	15382602	chr6	170606210	170608210	3018292	2.27186	1.97524	0	1	1	0	0	0	0	0	1	3	0	0	1	0	0	0	0	1	1	CHEF
chr7	73141104	73141504	chr15	93904763	93906763	1039314	2.26797	0.89949	1	0	0	0	0	0	0	0	0	1	1	1	1	0	1	0	1	5	1	CHEF
chr15	30645821	30646221	chr5	11385199	11387199	1014824	2.26446	1.25702	0	1	0	0	0	0	0	0	0	1	1	1	1	0	1	0	1	5	1	CHEF
chr13	54118368	54118786	chr5	174973970	174975970	3011907	2.26445	4.39065	1	1	1	0	0	0	0	0	0	3	1	1	1	0	1	0	1	5	1	CHEF
chr8	12431085	12432004	chr13	112758774	112760774	4041046	2.26358	1.40073	1	1	1	0	0	1	0	0	0	4	1	0	0	0	0	0	0	1	1	CHEF
chr2	166067056	166067456	chr20	46276613	46278613	1026150	2.26356	3.454	0	0	0	0	0	1	0	0	0	1	0	0	0	0	1	0	1	2	1	CHEF
chr4	43398619	43399711	chr9	35517492	35519492	3029286	2.26043	1.59085	0	0	1	1	0	0	0	0	1	3	0	0	1	0	1	0	0	2	1	CHEF
chr15	91018583	91019000	chr12	39786925	39788925	2016041	2.25813	3.15158	1	1	0	0	0	0	0	0	0	2	1	1	1	0	1	0	0	4	1	CHEF
chr7	109507138	109507538	chr11	8691901	8693901	1039935	2.25692	3.8749	0	0	1	0	0	0	0	0	0	1	1	0	1	0	1	0	0	3	1	CHEF
chr1	182094453	182095538	chr1	225933013	225935013	3002688	2.25163	1.92393	1	0	1	0	0	1	0	0	0	3	0	0	1	0	0	0	1	2	1	CHEF
chr10	117152189	117152679	chr12	69859722	69861722	3005092	2.23958	2.2675	1	1	1	0	0	0	0	0	0	3	0	1	1	0	1	0	0	3	1	CHEF
chr3	68869210	68870190	chr3	159942406	159944406	2027467	2.23609	1.19712	0	0	1	0	0	1	0	0	0	2	0	0	1	0	1	0	1	3	1	CHEF
chr12	97402977	97403382	chr14	87652233	87654233	3010500	2.23598	1.91402	1	1	1	0	0	0	0	0	0	3	1	1	1	0	1	0	1	5	1	CHEF
chr13	36578499	36579016	chr6	5850846	5852846	2011465	2.231	1.09145	0	0	1	0	0	1	0	0	0	2	0	0	1	0	1	0	0	2	1	CHEF
chr4	57765819	57766310	chr9	112789068	112791068	4029610	2.22716	1.24953	1	1	1	1	0	0	0	0	0	4	0	1	1	0	1	0	0	3	1	CHEF
chr6	76639572	76639999	chr2	81100719	81102719	3036359	2.21909	3.917	1	1	1	0	0	0	0	0	0	3	1	1	1	0	1	0	1	5	1	CHEF
chr17	45805718	45806164	chr6	43969131	43971131	2019259	2.2099	3.77993	0	0	1	0	0	1	0	0	0	2	0	1	1	1	1	1	1	6	1	CHEF
chr8	89269953	89270353	chr16	51423516	51425516	1042491	2.2005	4.16795	1	0	0	0	0	0	0	0	0	1	0	0	1	0	0	0	1	2	1	CHEF
chr16	43603762	43604251	chr3	114074140	114076140	3017503	2.19747	2.31945	1	1	1	0	0	0	0	0	0	3	1	1	1	0	1	0	1	5	1	CHEF
chr12	39667649	39668077	chr7	13153860	13155860	2009634	2.19638	1.76429	1	1	0	0	0	0	0	0	0	2	0	0	0	0	1	0	0	1	1	CHEF
chr8	48809797	48810227	chr4	183099431	183101431	2041651	2.18731	1.99583	0	1	1	0	0	0	0	0	0	2	1	0	0	0	1	0	0	2	1	CHEF
chr4	44851703	44852309	chr9	37250596	37252596	3029350	2.18724	3.15822	1	1	1	0	0	0	0	0	0	3	1	1	1	0	1	0	1	5	1	CHEF
chr9	14244990	14245504	chr11	94988025	94990025	3043640	2.18168	3.83836	1	1	1	0	0	0	0	0	0	3	1	0	0	0	0	0	0	1	1	CHEF
chr8	3220904	3221426	chr19	7197128	7199128	3040883	2.17036	2.94226	1	0	1	0	0	1	0	0	0	3	1	0	0	1	0	0	0	2	1	CHEF
chrX	7869865	7870366	chrX	48785694	48787694	3046185	2.16951	4.52387	1	1	1	0	0	0	0	0	0	3	0	0	0	0	0	0	0	0	1	CHEF
chr4	99573037	99573437	chr1	63663567	63665567	1029975	2.16813	1.75229	0	0	1	0	0	0	0	0	0	1	1	0	1	0	1	0	1	4	1	CHEF
chr2	122351910	122352369	chr15	45461135	45463135	3025141	2.1636	2.66064	1	1	1	0	0	0	0	0	0	3	1	0	0	0	0	0	0	1	1	CHEF
chr11	103840883	103841408	chr17	44809240	44811240	2008423	2.16339	2.00296	0	1	1	0	0	0	0	0	0	2	1	0	1	0	1	0	1	4	1	CHEF
chr7	122477892	122478673	chr16	24065508	24067508	3040228	2.16332	1.71193	1	1	1	0	0	0	0	0	0	3	0	0	1	0	0	0	0	1	1	CHEF
chr1	64884970	64885399	chr2	208797283	208799283	2000793	2.16078	2.01565	1	1	0	0	0	0	0	0	0	2	0	0	0	0	0	0	1	1	1	CHEF
chr4	124035707	124036118	chr1	39192545	39194545	3030583	2.15885	2.85898	1	1	1	0	0	0	0	0	0	3	1	1	1	0	1	0	0	4	1	CHEF
chr12	79625805	79626270	chr14	68727073	68729073	3010158	2.15859	4.52413	1	1	1	0	0	0	0	0	0	3	1	1	1	0	1	0	1	5	1	CHEF
chr10	62137182	62137588	chr10	71327699	71329699	2003930	2.15202	2.19538	0	1	0	1	0	0	0	0	0	2	1	1	0	0	0	1	1	4	1	CHEF
chr13	84348074	84348527	chr5	87436223	87438223	4012386	2.14999	1.3458	1	0	1	1	0	1	0	0	0	4	1	0	0	0	0	0	0	1	1	CHEF
chr14	46418377	46418777	chr14	54444963	54446963	1013507	2.14835	2.80083	0	0	0	0	0	0	0	0	1	1	0	0	0	0	1	0	1	2	1	CHEF
chr13	53475514	53476352	chr5	174147348	174149348	3011901	2.14633	1.07622	1	0	1	0	0	1	0	0	0	3	0	0	1	0	1	0	1	3	1	CHEF
chr8	4192759	4193644	chr19	7917116	7919116	3040923	2.14613	1.00313	1	1	1	0	0	0	0	0	0	3	0	0	0	0	0	1	1	2	1	CHEF
chr16	72693170	72693570	chr3	79035113	79037113	1017701	2.14565	1.08448	0	0	1	0	0	0	0	0	0	1	0	1	0	0	1	0	0	2	1	CHEF
chr7	132616372	132616886	chr10	126157825	126159825	4040510	2.14514	4.81829	1	1	1	0	0	0	0	0	1	4	1	1	1	0	1	0	1	5	1	CHEF
chr15	59823515	59824372	chr8	126649376	126651376	5015172	2.14386	2.03808	1	1	1	1	0	1	0	0	0	5	1	0	0	0	0	0	0	1	1	CHEF
chr8	8655717	8656117	chr13	107181230	107183230	1040963	2.14356	2.54587	0	1	0	0	0	0	0	0	0	1	0	0	0	0	1	0	1	2	1	CHEF
chr7	65450135	65450611	chr15	30195385	30197385	3039213	2.14199	2.12163	1	1	1	0	0	0	0	0	0	3	1	0	0	0	1	0	0	2	1	CHEF
chr14	99278426	99278826	chr13	73611379	73613379	1014274	2.14083	1.11417	0	1	0	0	0	0	0	0	0	1	0	1	1	0	1	0	1	4	1	CHEF
chr9	116213216	116213634	chr3	30590273	30592273	2045934	2.13899	3.98579	0	1	1	0	0	0	0	0	0	2	0	1	1	0	1	0	1	4	1	CHEF
chr11	84276833	84277351	chr17	35581736	35583736	5007451	2.13563	1.77461	1	1	1	1	0	0	0	0	1	5	1	0	1	0	1	0	0	3	1	CHEF
chr13	60627755	60628196	chr9	90144797	90146797	3012127	2.132	1.48924	1	1	1	0	0	0	0	0	0	3	0	0	0	0	0	0	1	1	1	CHEF
chr10	120745196	120745596	chr12	65903462	65905462	1005183	2.1291	1.73818	0	0	1	0	0	0	0	0	0	1	0	0	1	0	1	0	0	2	1	CHEF
chr12	118659359	118659813	chr7	21069124	21071124	3011013	2.12697	3.01542	1	1	1	0	0	0	0	0	0	3	1	1	1	0	1	0	1	5	1	CHEF
chr3	148986282	148987110	chr1	82268879	82270879	4028736	2.1262	2.79239	1	1	1	1	0	0	0	0	0	4	1	1	1	0	1	0	1	5	1	CHEF
chr1	62398224	62398832	chr2	206222303	206224303	4000734	2.12513	4.65079	1	1	1	0	0	0	0	0	1	4	0	0	0	0	1	0	1	2	1	CHEF
chr17	27994045	27994784	chr6	34959300	34961300	3018635	2.12469	1.06525	0	1	1	1	0	0	0	0	0	3	0	0	1	0	0	0	1	2	1	CHEF
chr5	147751580	147751980	chr13	29104323	29106323	1035290	2.11641	2.58626	0	0	0	0	0	1	0	0	0	1	0	0	1	0	1	0	1	3	1	CHEF
chr15	53197994	53198394	chr8	118959657	118961657	1015066	2.11548	2.38516	1	0	0	0	0	0	0	0	0	1	0	1	1	0	1	0	1	4	1	CHEF
chr13	54818314	54818867	chr5	176098325	176100325	3011940	2.11495	2.1108	1	0	0	1	0	0	0	0	1	3	1	0	1	0	0	0	0	2	1	CHEF
chr17	47441628	47442028	chr6	42103481	42105481	1019365	2.10631	4.9623	0	0	0	0	0	0	0	0	1	1	1	0	1	0	1	0	1	4	1	CHEF
chr9	107901286	107901755	chr3	49946990	49948990	2045670	2.10574	1.13852	0	0	1	0	0	1	0	0	0	2	1	0	0	0	0	0	1	2	1	CHEF
chr8	23360749	23361287	chr8	41217545	41219545	4041210	2.10307	3.38938	1	1	1	0	0	0	0	0	1	4	1	1	1	0	1	0	1	5	1	CHEF
chr1	72945041	72945772	chr2	217629799	217631799	3000899	2.10189	1.78191	0	0	1	0	1	1	0	0	0	3	0	0	1	0	0	0	1	2	1	CHEF
chr4	82435736	82436136	chr9	14237657	14239657	1029793	2.10134	1.85019	0	0	1	0	0	0	0	0	0	1	0	0	1	0	1	0	0	2	1	CHEF
chr3	51215732	51216132	chr17	30553850	30555850	1027254	2.0963	2.6383	0	0	1	0	0	0	0	0	0	1	1	0	1	0	0	0	1	3	1	CHEF
chr14	122450810	122451372	chr13	100608401	100610401	1014543	2.09375	1.8472	0	0	0	0	0	1	0	0	0	1	0	0	1	0	1	0	0	2	1	CHEF
chr4	45654268	45655131	chr9	38213863	38215863	4029385	2.09244	0.749906	1	1	1	1	0	0	0	0	0	4	1	1	1	0	1	0	1	5	1	CHEF
chr7	101684221	101684621	chr11	72118933	72120933	1039850	2.09027	3.0758	0	0	0	0	0	1	0	0	0	1	0	0	0	0	1	0	1	2	1	CHEF
chr13	51730035	51730435	chr9	92026922	92028922	1011837	2.08636	2.47499	0	0	0	0	0	1	0	0	0	1	0	0	1	0	1	0	0	2	1	CHEF
chr6	4738673	4739127	chr7	94275811	94277811	5035433	2.08311	1.6179	1	1	1	1	0	0	0	0	1	5	1	0	1	0	1	0	1	4	1	CHEF
chr15	103305008	103305525	chr12	54751606	54753606	2016530	2.0791	3.00396	0	0	1	0	0	1	0	0	0	2	0	0	1	1	0	0	0	2	1	CHEF
chr8	120407678	120408510	chr16	85469683	85471683	4043211	2.07835	4.43937	1	1	1	0	0	1	0	0	0	4	1	0	1	0	0	0	0	2	1	CHEF
chr11	85714472	85714927	chr17	59330292	59332292	2007492	2.07713	1.56381	1	1	0	0	0	0	0	0	0	2	0	0	1	0	0	0	1	2	1	CHEF
chr13	75797687	75798087	chr5	95193761	95195761	1012326	2.07134	1.1184	0	0	1	0	0	0	0	0	0	1	0	0	1	0	1	0	0	2	1	CHEF
chr9	90833681	90834543	chr3	147651563	147653563	3045313	2.06451	5.29437	1	1	1	0	0	0	0	0	0	3	1	1	1	0	1	0	1	5	1	CHEF
chr8	127343081	127343503	chr10	34701308	34703308	3043520	2.06302	1.79277	1	1	1	0	0	0	0	0	0	3	1	1	1	0	1	0	1	5	1	CHEF
chr14	83008488	83008934	chr13	56653622	56655622	3014208	2.063	1.18863	1	1	1	0	0	0	0	0	0	3	0	0	1	0	0	0	1	2	1	CHEF
chr12	76072108	76072508	chr14	64652325	64654325	1010078	2.06241	3.16184	0	0	1	0	0	0	0	0	0	1	0	0	1	0	1	0	1	3	1	CHEF
chr19	7423344	7423819	chr11	63529334	63531334	1021910	2.06058	6.88587	0	0	0	0	0	1	0	0	0	1	0	0	0	1	1	0	0	2	1	CHEF
chr1	81718200	81718600	chr2	227023651	227025651	1001096	2.05584	3.02147	1	0	0	0	0	0	0	0	0	1	0	1	1	0	1	0	1	4	1	CHEF
chr12	3738735	3739194	chr2	25668058	25670058	3009231	2.05438	1.46906	1	1	1	0	0	0	0	0	0	3	1	0	1	0	1	0	0	3	1	CHEF
chr1	79454134	79454621	chr2	224482266	224484266	1001079	2.05362	0.813184	0	0	1	0	0	0	0	0	0	1	1	1	1	1	1	0	1	6	1	CHEF
chr9	48197294	48197741	chr11	114702637	114704637	3044336	2.05145	1.07658	1	1	1	0	0	0	0	0	0	3	0	0	1	0	0	0	0	1	1	CHEF
chr8	35268987	35269410	chr8	9122560	9124560	2041456	2.04987	5.01408	1	1	0	0	0	0	0	0	0	2	0	0	0	0	1	0	0	1	1	CHEF
chr11	112839693	112840167	chr17	70177551	70179551	2008651	2.0367	1.54348	1	0	1	0	0	0	0	0	0	2	1	0	0	0	0	0	0	1	1	CHEF
chr2	33580533	33581028	chr9	129438264	129440264	4023827	2.03369	1.93578	1	1	1	0	0	1	0	0	0	4	1	1	1	1	1	1	1	7	1	CHEF
chr8	107833373	107833942	chr16	74053386	74055386	2042870	2.0316	1.57834	0	1	1	0	0	0	0	0	0	2	0	1	1	0	1	0	1	4	1	CHEF
chr4	152292034	152292434	chr1	6299751	6301751	1032022	2.02898	4.90778	0	0	0	0	0	0	0	0	1	1	0	0	0	1	0	0	1	2	1	CHEF
chr8	12050780	12051236	chr13	112248567	112250567	2041033	2.02725	1.99262	1	1	0	0	0	0	0	0	0	2	1	0	0	0	0	0	0	1	1	CHEF
chr4	122998470	122998870	chr1	40363882	40365882	1030526	2.02402	2.82139	0	1	0	0	0	0	0	0	0	1	0	1	0	0	0	0	0	1	1	CHEF
chr17	85486433	85487316	chr2	45028987	45030987	2020059	2.02302	2.99836	0	0	1	0	0	1	0	0	0	2	1	1	1	0	1	0	1	5	1	CHEF
chr14	11670802	11671202	chr3	61673129	61675129	1013032	2.02165	3.41181	0	0	1	0	0	0	0	0	0	1	1	1	1	0	1	0	1	5	1	CHEF
chr5	75012982	75013496	chr4	54881025	54883025	3033210	2.01595	2.46567	1	1	1	0	0	0	0	0	0	3	1	1	1	0	1	0	1	5	1	CHEF
chr10	29146775	29147212	chr6	127836422	127838422	2003389	2.01491	1.87137	0	0	1	0	0	1	0	0	0	2	0	0	0	0	1	1	1	3	1	CHEF
chr1	77440422	77440822	chr2	222359646	222361646	1001042	2.01457	1.50324	0	1	0	0	0	0	0	0	0	1	1	0	1	0	0	0	0	2	1	CHEF
chrX	99455519	99455928	chrX	68368847	68370847	1046685	2.01288	4.93968	0	1	0	0	0	0	0	0	0	1	0	1	0	0	0	0	0	1	1	CHEF
chr10	18482479	18482921	chr6	138805551	138807551	2003170	2.00612	3.7758	0	1	1	0	0	0	0	0	0	2	0	1	1	0	1	0	1	4	1	CHEF
chr2	21963955	21964474	chr10	26054759	26056759	3023334	2.0052	2.77359	1	1	1	0	0	0	0	0	0	3	1	1	1	0	1	0	1	5	1	CHEF
chr17	70706985	70707640	chr18	3665273	3667273	2019770	2.0019	4.14406	0	0	1	0	0	0	0	0	1	2	0	0	0	0	1	0	1	2	1	CHEF
chr6	8661440	8661930	chr7	8185836	8187836	4035499	1.99591	1.23832	1	1	1	1	0	0	0	0	0	4	1	0	1	0	0	0	1	3	1	CHEF
chr16	29723021	29723559	chr3	193492456	193494456	3017157	1.98425	2.32012	1	1	1	0	0	0	0	0	0	3	1	1	1	0	1	0	1	5	1	CHEF
chr13	44582449	44582849	chr6	15016755	15018755	1011660	1.97915	2.88744	1	0	0	0	0	0	0	0	0	1	1	0	0	0	0	0	1	2	1	CHEF
chr2	18767105	18767575	chr10	22725058	22727058	2023267	1.97376	1.89392	0	0	1	0	0	1	0	0	0	2	1	0	0	0	1	1	1	4	1	CHEF
chr9	41515054	41515454	chr11	122037171	122039171	1044116	1.9737	1.40448	0	0	0	0	0	1	0	0	0	1	0	0	1	0	1	0	0	2	1	CHEF
chr2	125119687	125120095	chr15	48462396	48464396	2025164	1.9718	1.59535	1	1	0	0	0	0	0	0	0	2	0	0	1	0	0	0	0	1	1	CHEF
chrX	103611450	103611883	chrX	73503566	73505566	2046760	1.97023	2.50153	0	1	1	0	0	0	0	0	0	2	0	1	0	0	0	0	0	1	1	CHEF
chr1	165966513	165966952	chr1	167236754	167238754	2002345	1.9658	1.22097	0	1	1	0	0	0	0	0	0	2	0	0	1	0	0	0	1	2	1	CHEF
chr11	96697179	96697579	chr17	46268157	46270157	1007908	1.96534	2.12245	0	0	0	0	0	1	0	0	0	1	0	1	1	0	1	0	0	3	1	CHEF
chr9	118487651	118488511	chr3	27754401	27756401	2045964	1.96305	1.33972	0	0	0	1	0	1	0	0	0	2	0	0	0	0	1	0	1	2	1	CHEF
chr10	44520206	44520631	chr6	106449080	106451080	3003655	1.95537	1.75807	1	1	1	0	0	0	0	0	0	3	0	1	1	0	1	0	1	4	1	CHEF
chr17	10567500	10567951	chr6	163519702	163521702	3018211	1.9547	3.34145	1	1	1	0	0	0	0	0	0	3	1	1	1	0	1	0	1	5	1	CHEF
chr13	56220968	56222394	chr5	134824111	134826111	5012010	1.95419	1.18525	1	1	1	0	1	1	0	0	0	5	0	0	1	1	0	0	1	3	1	CHEF
chr13	109822356	109822756	chr5	58422590	58424590	1012808	1.95182	3.34575	0	0	1	0	0	0	0	0	0	1	1	0	1	1	1	0	1	5	1	CHEF
chr6	50718561	50719024	chr7	25341554	25343554	4036023	1.94988	2.32187	1	1	1	1	0	0	0	0	0	4	1	0	1	0	1	0	1	4	1	CHEF
chr6	8956712	8957191	chr7	8480835	8482835	4035502	1.94758	1.13604	1	1	1	0	0	0	0	0	1	4	1	1	1	0	1	1	0	5	1	CHEF
chr13	64107444	64107880	chr9	99105922	99107922	2012186	1.94337	3.67337	0	1	1	0	0	0	0	0	0	2	0	0	1	0	0	0	0	1	1	CHEF
chr11	63533525	63533970	chr17	14682634	14684634	3006727	1.94058	1.82899	1	1	1	0	0	0	0	0	0	3	1	0	0	0	0	0	0	1	1	CHEF
chr3	127124701	127125101	chr4	114065756	114067756	1028447	1.93842	2.59649	1	0	0	0	0	0	0	0	0	1	1	0	0	0	1	0	0	2	1	CHEF
chr10	21090843	21091314	chr6	135590093	135592093	4003243	1.92783	4.97108	1	1	1	0	0	1	0	0	0	4	0	0	0	0	0	0	0	0	1	CHEF
chrX	86728795	86729220	chrX	29990945	29992945	3046627	1.92713	1.45889	1	1	1	0	0	0	0	0	0	3	0	0	0	0	0	0	1	1	1	CHEF
chr3	85337845	85338619	chr4	152913183	152915183	4027605	1.92316	2.00544	1	1	1	0	0	0	0	0	1	4	1	0	0	0	0	0	0	1	1	CHEF
chr12	27151175	27151613	chr2	6085472	6087472	1009519	1.92012	2.43279	0	1	0	0	0	0	0	0	0	1	0	0	1	0	1	0	0	2	1	CHEF
chr12	27320643	27321155	chr2	5865591	5867591	3009521	1.91716	4.1409	1	1	1	0	0	0	0	0	0	3	1	1	1	0	1	1	1	6	1	CHEF
chr5	90338454	90338854	chr4	74086641	74088641	1033346	1.91697	1.82964	1	0	0	0	0	0	0	0	0	1	1	0	0	0	0	0	1	2	1	CHEF
chr10	19404314	19404762	chr6	137743801	137745801	4003188	1.91685	4.48725	1	1	1	0	0	1	0	0	0	4	1	1	1	0	1	0	1	5	1	CHEF
chr2	44538133	44538578	chr2	144663612	144665612	3024003	1.91146	2.40448	1	1	1	0	0	0	0	0	0	3	1	1	1	0	1	0	1	5	1	CHEF
chr13	34239332	34239732	chr6	3340854	3342854	1011425	1.90883	2.59571	1	0	0	0	0	0	0	0	0	1	0	1	1	0	1	0	0	3	1	CHEF
chr16	23504374	23504785	chr3	186991907	186993907	2017102	1.90826	4.10166	1	1	0	0	0	0	0	0	0	2	1	1	0	0	1	0	0	3	1	CHEF
chr12	99329413	99329813	chr14	89802472	89804472	1010521	1.90359	2.75317	0	0	0	0	0	1	0	0	0	1	0	0	0	0	1	0	1	2	1	CHEF
chr12	33175898	33176298	chr7	105477961	105479961	1009599	1.90098	1.94119	0	0	1	0	0	0	0	0	0	1	1	0	1	0	1	0	0	3	1	CHEF
chr12	37773946	37774428	chr7	15054472	15056472	2009628	1.89419	2.0883	1	1	0	0	0	0	0	0	0	2	0	0	0	0	1	0	0	1	1	CHEF
chrX	99152683	99153427	chrX	68065538	68067538	3046678	1.89197	1.82115	1	1	1	0	0	0	0	0	0	3	1	1	1	0	0	0	0	3	1	CHEF
chr18	25567880	25568280	chr18	34941353	34943353	1020501	1.89121	1.12574	1	0	0	0	0	0	0	0	0	1	1	0	1	0	0	0	1	3	1	CHEF
chr16	78238365	78238839	chr21	18810175	18812175	2017741	1.88567	1.01018	0	0	1	0	0	0	0	0	1	2	1	0	1	0	1	0	1	4	1	CHEF
chr12	118530031	118530460	chr7	21208381	21210381	2011010	1.8848	2.56752	0	0	1	0	0	1	0	0	0	2	0	1	1	0	1	0	1	4	1	CHEF
chrX	99521886	99522727	chrX	68440464	68442464	2046687	1.88225	1.82987	1	1	0	0	0	0	0	0	0	2	0	1	0	0	0	0	0	1	1	CHEF
chr5	15935872	15936291	chr7	82070655	82072655	2032294	1.88027	2.99595	1	1	0	0	0	0	0	0	0	2	1	1	1	0	0	0	1	4	1	CHEF
chr10	9331584	9332116	chr6	148201766	148203766	3003050	1.87243	1.13237	1	1	1	0	0	0	0	0	0	3	0	0	1	0	0	0	0	1	1	CHEF
chr16	45843207	45843607	chr3	111578578	111580578	1017547	1.87217	2.36317	0	0	0	0	0	0	0	0	1	1	1	1	1	0	1	0	1	5	1	CHEF
chr2	106720298	106720698	chr11	30581350	30583350	1024876	1.87092	3.91119	0	1	0	0	0	0	0	0	0	1	1	1	1	0	1	0	1	5	1	CHEF
chr2	26091387	26091814	chr9	138942450	138944450	1023427	1.86843	1.12082	0	0	0	0	0	1	0	0	0	1	1	0	1	0	1	0	0	3	1	CHEF
chr2	18041149	18041553	chr10	21798362	21800362	1023245	1.86761	6.83135	0	0	0	0	0	1	0	0	0	1	0	0	1	0	0	0	1	2	1	CHEF
chr9	99166261	99166661	chr3	138581380	138583380	1045433	1.86739	4.95881	0	0	0	1	0	0	0	0	0	1	1	1	0	0	0	0	0	2	1	CHEF
chr16	91837163	91837629	chr21	35166001	35168001	3017896	1.86547	2.9712	1	1	1	0	0	0	0	0	0	3	0	0	1	0	0	0	0	1	1	CHEF
chr6	93716735	93717517	chr3	65386006	65388006	3036737	1.8594	3.24358	1	1	0	0	0	0	0	0	1	3	1	1	1	0	1	0	1	5	1	CHEF
chr19	46244614	46245029	chr10	104101401	104103401	2022729	1.85807	0.821685	1	1	0	0	0	0	0	0	0	2	1	1	1	0	1	0	1	5	1	CHEF
chr19	5797800	5798200	chr11	65270492	65272492	1021777	1.85806	1.13436	0	0	0	0	0	0	1	0	0	1	0	0	0	0	1	0	0	1	1	CHEF
chr8	112092820	112093280	chr16	75869376	75871376	3043020	1.85805	0.846654	1	1	0	0	0	0	0	0	1	3	0	0	1	0	0	0	1	2	1	CHEF
chr1	77412884	77413284	chr2	222332140	222334140	1001040	1.85206	0.855383	0	0	1	0	0	0	0	0	0	1	1	1	1	0	1	0	1	5	1	CHEF
chr5	67222298	67222965	chr4	41874542	41876542	2033106	1.85059	0.851644	0	0	0	0	0	1	0	0	1	2	0	0	1	0	0	0	1	2	1	CHEF
chr3	78792397	78792874	chr4	160528201	160530201	1027497	1.85028	2.29592	0	0	1	0	0	0	0	0	0	1	1	1	1	0	0	0	1	4	1	CHEF
chr18	16713437	16713837	chr18	25665832	25667832	1020388	1.84425	2.45548	0	0	1	0	0	0	0	0	0	1	0	0	1	0	1	0	0	2	1	CHEF
chr13	48227618	48228102	chr6	19804107	19806107	3011746	1.84322	1.9796	0	0	1	0	0	1	0	0	1	3	0	1	0	1	1	0	0	3	1	CHEF
chr12	118836393	118837021	chr7	20837096	20839096	2011015	1.83201	5.44604	0	0	1	0	0	1	0	0	0	2	0	0	0	0	1	1	0	2	1	CHEF
chr19	19945284	19945689	chr9	76229509	76231509	2022102	1.83186	2.87035	1	1	0	0	0	0	0	0	0	2	1	1	1	0	1	0	1	5	1	CHEF
chr2	119322057	119322858	chr15	41217105	41219105	3025028	1.83078	0.78893	1	0	1	0	0	1	0	0	0	3	1	0	1	0	0	0	1	3	1	CHEF
chr4	13565730	13566189	chr8	93330524	93332524	3028999	1.82744	1.28869	1	1	1	0	0	0	0	0	0	3	0	0	0	0	0	0	1	1	1	CHEF
chr18	61034742	61035173	chr5	149546648	149548648	3021080	1.82708	0.790884	1	1	0	1	0	0	0	0	0	3	1	1	0	0	0	0	0	2	1	CHEF
chr4	53196744	53197167	chr9	107730446	107732446	2029495	1.81953	2.71198	1	1	0	0	0	0	0	0	0	2	1	0	1	1	0	0	0	3	1	CHEF
chr4	133485837	133486237	chr1	27332514	27334514	1031098	1.81941	7.63669	0	0	1	0	0	0	0	0	0	1	1	1	1	0	1	0	1	5	1	CHEF
chr9	71915859	71916323	chr15	57489940	57491940	2045054	1.81872	4.60295	1	1	0	0	0	0	0	0	0	2	1	0	1	0	1	0	1	4	1	CHEF
chrX	58121190	58121937	chrX	136765953	136767953	3046488	1.81803	3.2705	1	1	1	0	0	0	0	0	0	3	0	0	1	0	0	0	0	1	1	CHEF
chr10	43043428	43043876	chr6	107931343	107933343	2003602	1.81798	1.14944	0	1	0	1	0	0	0	0	0	2	0	1	1	0	1	0	1	4	1	CHEF
chr18	55196143	55196543	chr5	124330718	124332718	1021003	1.8146	3.0941	0	0	1	0	0	0	0	0	0	1	0	1	1	0	1	0	1	4	1	CHEF
chr5	108518673	108519283	chr4	778166	780166	4033680	1.80926	2.25987	1	1	1	1	0	0	0	0	0	4	1	0	1	0	0	0	1	3	1	CHEF
chr10	24357638	24358038	chr6	132557013	132559013	1003318	1.80917	1.37292	0	0	0	1	0	0	0	0	0	1	0	0	1	0	1	0	1	3	1	CHEF
chr4	129966282	129966700	chr1	32247742	32249742	2030893	1.80902	2.24702	1	1	0	0	0	0	0	0	0	2	1	0	0	0	0	0	0	1	1	CHEF
chr1	132983649	132984049	chr1	204533567	204535567	1001766	1.80855	1.09833	0	0	0	1	0	0	0	0	0	1	0	0	1	0	1	0	0	2	1	CHEF
chr6	112203245	112203724	chr3	8467732	8469732	3036947	1.80534	0.926619	1	1	1	0	0	0	0	0	0	3	0	0	0	0	0	0	1	1	1	CHEF
chr9	113192754	113193221	chr3	34405590	34407590	3045835	1.80192	0.948769	1	1	1	0	0	0	0	0	0	3	0	0	1	0	0	0	1	2	1	CHEF
chr7	70591603	70592045	chr15	96629612	96631612	3039289	1.8013	0.841729	1	1	1	0	0	0	0	0	0	3	1	1	1	0	1	0	1	5	1	CHEF
chr9	46443223	46443869	chr11	116450082	116452082	2044302	1.79935	1.58469	0	0	1	0	0	1	0	0	0	2	1	1	1	0	1	0	1	5	1	CHEF
chr2	69544099	69544551	chr2	170156581	170158581	2024270	1.79593	1.14217	0	1	1	0	0	0	0	0	0	2	0	0	1	0	0	0	1	2	1	CHEF
chr12	106479652	106480085	chr14	97878711	97880711	2010723	1.79526	3.39442	1	1	0	0	0	0	0	0	0	2	1	0	0	0	0	0	1	2	1	CHEF
chr1	34236331	34236851	chr6	56406578	56408578	3000306	1.79234	2.12285	0	0	1	0	0	1	0	0	1	3	1	0	1	1	1	1	1	6	1	CHEF
chr12	86837768	86838168	chr14	77427776	77429776	1010415	1.79013	5.00124	0	0	0	1	0	0	0	0	0	1	1	0	1	0	0	0	1	3	1	CHEF
chr6	97046026	97046426	chr3	68967399	68969399	1036791	1.78951	0.763814	0	0	1	0	0	0	0	0	0	1	0	0	1	0	1	0	0	2	1	CHEF
chr15	91056071	91056526	chr12	39844941	39846941	3016043	1.78875	3.41345	1	1	1	0	0	0	0	0	0	3	1	1	1	0	1	0	1	5	1	CHEF
chr18	68140561	68140961	chr18	13471317	13473317	1021260	1.78627	1.30985	0	0	1	0	0	0	0	0	0	1	0	0	1	1	0	0	0	2	1	CHEF
chr6	47244096	47244496	chr7	148035105	148037105	1035928	1.78615	1.97975	0	1	0	0	0	0	0	0	0	1	0	0	0	1	1	0	1	3	1	CHEF
chr12	72820853	72821549	chr14	60783561	60785561	3010012	1.78406	3.15164	0	1	1	0	0	1	0	0	0	3	0	1	1	0	0	0	0	2	1	CHEF
chr3	16431493	16431901	chr8	64276537	64278537	2026889	1.78353	3.57267	0	1	1	0	0	0	0	0	0	2	0	0	0	0	1	0	0	1	1	CHEF
chr16	18459892	18460466	chr22	19878254	19880254	3016936	1.78174	2.64934	0	1	1	0	0	0	0	0	1	3	0	1	1	0	0	0	1	3	1	CHEF
chr1	152973785	152974266	chr1	183371774	183373774	3002103	1.77747	3.94859	1	1	1	0	0	0	0	0	0	3	1	1	1	0	1	0	1	5	1	CHEF
chr17	88404522	88404952	chr2	48510174	48512174	3020163	1.77535	2.23548	1	1	1	0	0	0	0	0	0	3	0	0	1	0	1	0	0	2	1	CHEF
chr11	107376258	107376658	chr17	65486383	65488383	1008553	1.77513	3.01099	0	0	1	0	0	0	0	0	0	1	0	0	1	0	1	0	0	2	1	CHEF
chr3	154381533	154381975	chr1	75548587	75550587	3028814	1.77449	2.06848	1	1	1	0	0	0	0	0	0	3	1	1	1	0	1	0	1	5	1	CHEF
chr2	172827385	172827785	chr20	55644690	55646690	1026499	1.77417	0.966353	0	0	0	0	1	0	0	0	0	1	0	0	1	0	0	0	1	2	1	CHEF
chr4	129251560	129251984	chr1	33201549	33203549	2030838	1.77121	3.56222	1	0	0	0	0	0	0	0	1	2	1	1	1	0	1	0	1	5	1	CHEF
chr17	11092890	11093295	chr6	162830404	162832404	1018216	1.75842	1.37321	0	1	0	0	0	0	0	0	0	1	0	0	1	0	0	0	1	2	1	CHEF
chr14	61023158	61023558	chr13	24172049	24174049	1013806	1.75467	2.09541	0	1	0	0	0	0	0	0	0	1	1	1	1	0	0	0	0	3	1	CHEF
chr14	12389164	12389564	chr3	62400416	62402416	1013051	1.75202	2.85386	0	0	1	0	0	0	0	0	0	1	1	1	1	0	1	0	1	5	1	CHEF
chr12	56519831	56520790	chr14	36972919	36974919	5009822	1.74733	0.996425	1	1	1	0	0	1	1	0	0	5	1	1	1	0	0	0	1	4	1	CHEF
chr2	155742873	155743289	chr20	33753318	33755318	1025802	1.74581	3.02383	0	0	0	0	0	1	0	0	0	1	1	1	1	0	0	0	1	4	1	CHEF
chr13	92703392	92703824	chr5	79444067	79446067	1012448	1.74375	1.93056	0	1	0	0	0	0	0	0	0	1	0	0	1	0	1	0	0	2	1	CHEF
chr6	8368256	8368656	chr7	7832029	7834029	1035495	1.74351	3.57498	0	0	1	0	0	0	0	0	0	1	1	1	1	0	0	0	1	4	1	CHEF
chr3	50882359	50882780	chr4	139580346	139582346	3027251	1.74195	4.75171	1	1	1	0	0	0	0	0	0	3	1	0	1	0	1	0	1	4	1	CHEF
chr15	53237191	53237591	chr8	119006476	119008476	1015067	1.73964	1.39667	0	0	1	0	0	0	0	0	0	1	0	0	1	0	1	0	0	2	1	CHEF
chr3	51216375	51216775	chr17	30554038	30556038	1027255	1.73694	2.64417	0	0	0	0	0	0	0	0	1	1	1	0	1	0	0	0	1	3	1	CHEF
chr7	118976686	118977086	chr16	19872489	19874489	1040152	1.73515	6.27927	0	1	0	0	0	0	0	0	0	1	0	1	0	0	0	0	0	1	1	CHEF
chr11	94044957	94045357	chr17	49122233	49124233	1007707	1.73464	3.05104	0	1	0	0	0	0	0	0	0	1	0	0	1	0	1	0	1	3	1	CHEF
chr4	123972307	123972830	chr1	39269016	39271016	2030580	1.73451	1.61595	0	0	1	0	0	1	0	0	0	2	0	0	1	0	0	0	1	2	1	CHEF
chr11	96202727	96203160	chr17	46796473	46798473	2007871	1.73451	1.96402	0	0	1	0	0	1	0	0	0	2	1	1	1	0	1	0	1	5	1	CHEF
chr10	37397264	37397664	chr6	113885132	113887132	1003471	1.73333	1.79082	0	0	1	0	0	0	0	0	0	1	1	0	1	0	1	0	1	4	1	CHEF
chr1	107978323	107978823	chr18	61940170	61942170	3001479	1.72567	6.80328	1	1	1	0	0	0	0	0	0	3	1	1	1	0	1	0	1	5	1	CHEF
chr11	74637856	74638805	chr17	2626895	2628895	3007074	1.7222	2.88297	0	0	1	0	0	1	0	0	1	3	0	0	0	0	0	1	1	2	1	CHEF
chr3	134239067	134239487	chr4	105412334	105414334	1028565	1.72179	2.95422	1	0	0	0	0	0	0	0	0	1	1	0	1	0	1	0	0	3	1	CHEF
chr1	79581268	79581668	chr2	224589348	224591348	1001080	1.71961	2.72537	0	0	1	0	0	0	0	0	0	1	0	1	0	0	1	0	0	2	1	CHEF
chr12	54191912	54192312	chr14	34406692	34408692	1009772	1.71738	3.81965	0	0	1	0	0	0	0	0	0	1	1	0	1	0	1	0	0	3	1	CHEF
chr4	140001998	140002477	chr1	18736121	18738121	4031536	1.71675	3.33466	1	1	1	1	0	0	0	0	0	4	1	0	1	0	0	0	1	3	1	CHEF
chr4	140644658	140645081	chr1	17873079	17875079	2031566	1.71331	6.63291	1	1	0	0	0	0	0	0	0	2	1	0	0	0	0	0	0	1	1	CHEF
chr2	61656362	61656947	chr2	162094454	162096454	2024190	1.71282	1.30946	0	0	1	0	0	1	0	0	0	2	0	0	1	1	0	0	0	2	1	CHEF
chr14	66324816	66325216	chr8	27131190	27133190	1013923	1.70882	1.41935	0	0	1	0	0	0	0	0	0	1	0	0	1	1	0	1	0	3	1	CHEF
chr7	73644296	73644696	chr15	93285494	93287494	1039342	1.70688	4.91557	1	0	0	0	0	0	0	0	0	1	1	1	0	0	1	0	0	3	1	CHEF
chr2	68365458	68366457	chr2	168993488	168995488	2024243	1.70104	2.44716	0	1	0	0	0	0	0	0	1	2	0	0	1	0	1	0	0	2	1	CHEF
chr9	9158244	9158644	chr11	100661027	100663027	1043605	1.69873	4.31906	0	0	0	0	0	0	0	0	1	1	1	1	1	0	1	0	0	4	1	CHEF
chr4	100798065	100798465	chr1	64958379	64960379	1030005	1.69449	3.68544	0	0	0	1	0	0	0	0	0	1	1	1	1	0	1	0	1	5	1	CHEF
chr1	75442883	75443480	chr2	220370717	220372717	2001006	1.69092	5.79872	1	0	0	0	0	0	0	0	1	2	0	0	0	1	0	0	0	1	1	CHEF
chr11	112811036	112811940	chr17	70146568	70148568	3008650	1.69053	4.52161	1	1	1	0	0	0	0	0	0	3	1	1	1	0	1	0	1	5	1	CHEF
chr1	75616757	75617166	chr2	220571372	220573372	3001023	1.68344	1.72505	1	1	1	0	0	0	0	0	0	3	0	0	1	0	0	0	0	1	1	CHEF
chr18	9216480	9216974	chr10	35925472	35927472	3020274	1.68151	2.21056	1	1	1	0	0	0	0	0	0	3	0	1	1	0	1	0	1	4	1	CHEF
chr8	117470456	117470856	chr16	81763324	81765324	1043106	1.67224	2.19855	0	0	1	0	0	0	0	0	0	1	0	0	1	0	0	1	0	2	1	CHEF
chr1	105095020	105095479	chr18	59304270	59306270	3001446	1.66739	1.77854	1	1	0	1	0	0	0	0	0	3	1	1	1	0	1	0	1	5	1	CHEF
chr10	122931893	122932293	chr12	63049485	63051485	1005248	1.66472	2.62804	1	0	0	0	0	0	0	0	0	1	1	0	0	0	1	0	0	2	1	CHEF
chr8	57741289	57741782	chr4	173994768	173996768	1041706	1.66138	5.10669	0	0	1	0	0	0	0	0	0	1	1	1	1	0	1	0	1	5	1	CHEF
chr6	71013182	71013597	chr2	88649124	88651124	1036275	1.65242	3.94324	0	0	0	0	0	1	0	0	0	1	1	0	0	0	1	0	0	2	1	CHEF
chr9	102261951	102262511	chr3	134610272	134612272	4045487	1.65128	0.635311	1	1	1	1	0	0	0	0	0	4	0	1	1	0	0	0	0	2	1	CHEF
chr15	77150389	77150789	chr22	36231507	36233507	1015480	1.64803	3.81379	0	1	0	0	0	0	0	0	0	1	0	1	1	0	0	0	1	3	1	CHEF
chr4	28299996	28300529	chr6	94495469	94497469	3029095	1.64754	5.10336	1	1	1	0	0	0	0	0	0	3	1	1	1	0	1	0	1	5	1	CHEF
chr10	59957881	59958307	chr10	74025963	74027963	3003811	1.64506	2.54347	1	1	1	0	0	0	0	0	0	3	0	0	0	0	0	0	1	1	1	CHEF
chr14	118318512	118318912	chr13	95476945	95478945	1014418	1.64416	2.78324	0	0	0	0	0	0	0	0	1	1	1	0	1	0	1	0	1	4	1	CHEF
chr11	96972348	96972748	chr17	45977837	45979837	1007940	1.64367	1.9562	0	0	1	0	0	0	0	0	0	1	0	0	1	0	1	0	1	3	1	CHEF
chr14	122229009	122229409	chr13	100313138	100315138	1014520	1.63877	3.69356	0	1	0	0	0	0	0	0	0	1	0	1	1	0	1	0	1	4	1	CHEF
chr1	25012753	25013153	chr12	94913821	94915821	1000249	1.63732	1.22599	0	1	0	0	0	0	0	0	0	1	0	0	1	0	0	0	1	2	1	CHEF
chr11	68354737	68355137	chr17	8957187	8959187	1006811	1.63369	2.46475	0	1	0	0	0	0	0	0	0	1	1	1	1	0	1	0	1	5	1	CHEF
chr15	36468989	36469724	chr8	101521487	101523487	3014901	1.63167	1.68008	1	1	1	0	0	0	0	0	0	3	0	0	1	0	0	0	1	2	1	CHEF
chr13	48130602	48131161	chr6	19690915	19692915	4011741	1.62946	3.23196	1	1	1	0	0	1	0	0	0	4	1	1	1	0	1	0	1	5	1	CHEF
chr7	30216764	30217207	chr19	36617765	36619765	2038564	1.62903	3.18658	0	0	1	0	0	1	0	0	0	2	1	0	1	0	0	0	0	2	1	CHEF
chr3	97939541	97939941	chr1	120677808	120679808	1027998	1.6278	0.908248	0	0	0	0	0	0	0	0	1	1	0	1	1	0	1	0	1	4	1	CHEF
chr6	52598156	52598556	chr7	27641698	27643698	1036093	1.62776	4.73303	0	0	1	0	0	0	0	0	0	1	1	1	1	0	1	0	1	5	1	CHEF
chr8	25513337	25513809	chr8	38330901	38332901	3041273	1.62581	1.73039	1	1	1	0	0	0	0	0	0	3	1	0	1	0	0	0	1	3	1	CHEF
chr2	29856590	29856993	chr9	131170593	131172593	1023579	1.6227	1.10765	0	0	0	0	0	1	0	0	0	1	1	1	1	0	0	0	0	3	1	CHEF
chr1	95602008	95602447	chr5	100158680	100160680	2001411	1.62221	1.58839	0	1	1	0	0	0	0	0	0	2	0	0	1	0	0	0	0	1	1	CHEF
chr2	30784606	30785055	chr9	132358837	132360837	1023646	1.6212	4.21286	0	0	0	0	0	1	0	0	0	1	0	0	0	1	0	0	1	2	1	CHEF
chr4	107733574	107733974	chr1	53863038	53865038	1030131	1.61961	1.97543	0	1	0	0	0	0	0	0	0	1	0	1	0	0	1	0	0	2	1	CHEF
chr4	34554813	34555213	chr6	88406965	88408965	1029161	1.61853	2.8417	0	1	0	0	0	0	0	0	0	1	1	1	0	0	1	0	1	4	1	CHEF
chr7	113052882	113053282	chr11	13122763	13124763	1040031	1.61683	1.88614	1	0	0	0	0	0	0	0	0	1	0	0	1	0	1	0	0	2	1	CHEF
chr6	6069964	6070429	chr7	95772142	95774142	3035465	1.61653	0.884868	1	1	1	0	0	0	0	0	0	3	1	1	1	0	1	0	1	5	1	CHEF
chr12	38784259	38784743	chr7	14024050	14026050	3009631	1.61631	3.37396	1	1	1	0	0	0	0	0	0	3	0	0	1	0	1	0	1	3	1	CHEF
chr9	102205504	102205921	chr3	134659850	134661850	3045485	1.61485	1.20232	1	1	1	0	0	0	0	0	0	3	1	0	1	0	0	0	1	3	1	CHEF
chr18	10311062	10311532	chr18	18797917	18799917	4020289	1.61222	0.728105	1	1	1	1	0	0	0	0	0	4	0	0	1	0	1	0	1	3	1	CHEF
chr5	25466154	25466554	chr7	152095450	152097450	1032460	1.61038	1.62572	0	0	0	0	0	1	0	0	0	1	0	0	1	0	1	0	1	3	1	CHEF
chr5	120322537	120322959	chr12	114047013	114049013	3034222	1.60909	7.49717	1	1	1	0	0	0	0	0	0	3	1	1	1	0	1	0	1	5	1	CHEF
chr2	115869950	115870350	chr15	37189281	37191281	1024947	1.60796	2.58118	1	0	0	0	0	0	0	0	0	1	1	1	1	0	1	0	1	5	1	CHEF
chr14	118230127	118230615	chr13	95357996	95359996	3014415	1.60237	2.16788	1	1	1	0	0	0	0	0	0	3	1	1	1	0	1	0	1	5	1	CHEF
chr12	56458779	56459245	chr14	36911143	36913143	2009820	1.60021	1.11417	0	1	1	0	0	0	0	0	0	2	0	1	1	0	1	0	1	4	1	CHEF
chr3	56302725	56303169	chr13	35389164	35391164	3027339	1.59868	2.98816	1	1	1	0	0	0	0	0	0	3	1	0	1	0	1	0	0	3	1	CHEF
chr8	33199213	33199635	chr8	31095670	31097670	2041373	1.59777	5.4297	1	1	0	0	0	0	0	0	0	2	1	1	1	0	1	0	1	5	1	CHEF
chr17	75557052	75557486	chr2	33832271	33834271	3019870	1.59619	5.64021	1	1	1	0	0	0	0	0	0	3	0	0	1	0	1	0	1	3	1	CHEF
chr4	149759615	149760015	chr1	9618267	9620267	1031900	1.59419	0.700664	0	0	0	0	0	1	0	0	0	1	0	1	1	0	1	0	1	4	1	CHEF
chr1	168213934	168214474	chr1	164755858	164757858	3002399	1.59365	2.86896	0	1	1	0	0	0	0	0	1	3	0	0	1	0	0	0	0	1	1	CHEF
chr17	85189601	85190533	chr2	44706070	44708070	2020050	1.59033	2.22102	0	1	1	0	0	0	0	0	0	2	1	1	0	0	0	0	0	2	1	CHEF
chr11	4946217	4946617	chr22	29876867	29878867	1005536	1.58946	1.76001	0	0	0	1	0	0	0	0	0	1	0	0	1	1	0	0	1	3	1	CHEF
chr11	96203305	96203803	chr17	46795806	46797806	2007872	1.58919	2.26317	0	0	1	0	0	1	0	0	0	2	1	1	1	0	1	0	1	5	1	CHEF
chr3	8866180	8866602	chr8	80874922	80876922	2026773	1.58507	1.64046	0	1	1	0	0	0	0	0	0	2	0	1	1	0	1	0	0	3	1	CHEF
chr10	115475043	115475443	chr12	71949407	71951407	1005053	1.58495	1.00445	1	0	0	0	0	0	0	0	0	1	1	0	1	0	0	0	1	3	1	CHEF
chr17	48031580	48032035	chr6	41409909	41411909	1019437	1.58198	2.61941	0	0	0	0	0	1	0	0	0	1	0	0	0	0	1	0	1	2	1	CHEF
chr10	100111076	100111476	chr12	88864781	88866781	1004935	1.58062	1.22057	0	1	0	0	0	0	0	0	0	1	1	0	0	0	1	0	0	2	1	CHEF
chr17	85485062	85485560	chr2	45027508	45029508	1020058	1.58057	3.45321	0	0	1	0	0	0	0	0	0	1	0	0	1	0	1	0	1	3	1	CHEF
chr1	161274075	161274490	chr1	173399021	173401021	3002269	1.57809	3.8178	1	1	1	0	0	0	0	0	0	3	1	1	1	0	1	0	0	4	1	CHEF
chr10	85649512	85649912	chr12	108039118	108041118	1004692	1.57709	3.74309	0	0	0	1	0	0	0	0	0	1	0	0	1	0	0	0	1	2	1	CHEF
chr6	32202724	32203126	chr7	131872162	131874162	2035736	1.57619	3.86588	1	1	0	0	0	0	0	0	0	2	1	1	1	0	1	0	1	5	1	CHEF
chr1	193732050	193732579	chr1	209330142	209332142	3002934	1.57535	4.84427	1	1	1	0	0	0	0	0	0	3	0	0	1	0	0	0	0	1	1	CHEF
chr18	69437053	69437459	chr18	53154841	53156841	2021273	1.57491	2.69456	0	0	0	1	0	0	0	0	1	2	1	1	1	0	1	0	1	5	1	CHEF
chr18	38185038	38185438	chr5	141228280	141230280	1020772	1.57145	6.77022	0	0	0	0	0	1	0	0	0	1	0	0	0	1	0	0	1	2	1	CHEF
chr14	46639364	46639819	chr14	54723243	54725243	1013510	1.57077	1.58354	0	0	1	0	0	0	0	0	0	1	0	0	1	0	1	0	0	2	1	CHEF
chr3	79416966	79417378	chr4	159882717	159884717	2027505	1.56916	1.59287	1	1	0	0	0	0	0	0	0	2	0	0	0	0	1	0	0	1	1	CHEF
chr3	154328038	154328833	chr1	75601397	75603397	2028811	1.56843	1.38908	0	0	1	0	0	1	0	0	0	2	0	0	1	0	1	0	1	3	1	CHEF
chr11	116993850	116994250	chr17	74964129	74966129	1008894	1.56774	4.06438	0	0	0	0	0	0	0	0	1	1	1	0	1	0	1	1	0	4	1	CHEF
chr19	37173990	37175614	chr10	93998939	94000939	3022407	1.5664	1.05029	0	0	1	1	0	1	0	0	0	3	1	0	0	0	0	0	1	2	1	CHEF
chr16	90139300	90139717	chr21	32925714	32927714	2017820	1.56361	2.12926	0	0	0	1	0	0	0	0	1	2	0	0	1	0	0	0	1	2	1	CHEF
chr2	136107541	136107990	chr20	9552570	9554570	2025411	1.56341	2.69973	1	1	0	0	0	0	0	0	0	2	1	1	1	0	1	0	1	5	1	CHEF
chr1	165861753	165862153	chr1	167398997	167400997	1002342	1.56267	2.13535	0	0	0	1	0	0	0	0	0	1	0	0	1	0	1	0	0	2	1	CHEF
chr6	94952140	94952626	chr3	66847763	66849763	3036774	1.55572	2.66643	1	1	1	0	0	0	0	0	0	3	1	1	1	0	1	0	1	5	1	CHEF
chr13	78427704	78428120	chr5	92756358	92758358	2012349	1.55541	2.66295	1	1	0	0	0	0	0	0	0	2	1	1	1	0	0	0	0	3	1	CHEF
chr8	126665589	126665989	chr1	234858281	234860281	1043498	1.55365	3.63804	0	0	0	0	0	0	0	0	1	1	0	0	0	0	1	0	1	2	1	CHEF
chr12	71450137	71450537	chr14	59255075	59257075	1009976	1.55183	1.14565	0	0	0	1	0	0	0	0	0	1	1	1	1	0	0	0	1	4	1	CHEF
chr1	157440139	157440539	chr1	178029347	178031347	1002224	1.54986	2.90982	0	0	1	0	0	0	0	0	0	1	1	0	1	0	1	0	0	3	1	CHEF
chrX	99593888	99594288	chrX	68524600	68526600	1046690	1.54901	1.64586	0	0	1	0	0	0	0	0	0	1	0	0	1	0	0	0	1	2	1	CHEF
chr11	88873095	88873495	chr17	55149379	55151379	1007638	1.54894	2.2491	0	0	0	1	0	0	0	0	0	1	0	1	1	0	1	0	0	3	1	CHEF
chr1	189830909	189831309	chr1	214577005	214579005	1002827	1.54454	3.16068	0	0	1	0	0	0	0	0	0	1	0	0	1	0	1	0	1	3	1	CHEF
chr16	25817766	25818166	chr3	189523133	189525133	1017132	1.54272	1.57018	0	0	1	0	0	0	0	0	0	1	0	1	1	0	1	0	1	4	1	CHEF
chr10	59974202	59974801	chr10	74007487	74009487	7003814	1.54023	2.77836	1	1	1	1	1	1	1	0	0	7	0	0	0	0	0	0	0	0	1	CHEF
chr5	37967098	37967498	chr4	4668548	4670548	1032812	1.53628	4.62128	1	0	0	0	0	0	0	0	0	1	0	0	0	0	0	0	1	1	1	CHEF
chr3	5326739	5327139	chr8	77686826	77688826	1026737	1.53593	2.2402	0	0	1	0	0	0	0	0	0	1	0	0	1	0	1	0	0	2	1	CHEF
chr1	73663546	73663946	chr2	218415551	218417551	1000905	1.53548	1.4726	0	0	0	0	0	1	0	0	0	1	1	1	0	0	0	0	0	2	1	CHEF
chr19	26608424	26608897	chr9	2017898	2019898	3022238	1.53192	1.60367	1	1	1	0	0	0	0	0	0	3	1	1	1	0	1	0	1	5	1	CHEF
chr12	108320246	108320955	chr14	100129446	100131446	3010753	1.53185	2.992	0	1	0	1	0	0	0	0	1	3	1	1	1	0	1	0	1	5	1	CHEF
chr1	66349448	66349848	chr2	210478945	210480945	1000812	1.52808	3.86184	0	0	1	0	0	0	0	0	0	1	1	1	1	0	1	0	1	5	1	CHEF
chr1	89934712	89935113	chr2	237079852	237081852	2001284	1.52725	1.89934	0	1	1	0	0	0	0	0	0	2	1	0	1	1	0	0	1	4	1	CHEF
chr9	43188608	43189008	chr11	120125263	120127263	1044159	1.52595	3.10882	1	0	0	0	0	0	0	0	0	1	1	0	1	0	1	0	1	4	1	CHEF
chr11	31679483	31680442	chr5	173053926	173055926	2005998	1.52473	3.65081	0	0	1	0	0	1	0	0	0	2	1	0	1	0	1	0	0	3	1	CHEF
chr3	84479270	84479745	chr4	153857858	153859858	2027584	1.52024	3.02531	0	0	1	0	0	1	0	0	0	2	0	0	0	1	1	0	0	2	1	CHEF
chr12	118850460	118850864	chr7	20821953	20823953	2011020	1.51982	3.48955	1	1	0	0	0	0	0	0	0	2	1	0	0	0	1	0	1	3	1	CHEF
chr8	77512133	77512533	chr4	148657936	148659936	1042110	1.51848	1.58031	0	0	0	0	0	0	0	0	1	1	0	1	1	0	1	0	1	4	1	CHEF
chr17	90244312	90244739	chr2	50345086	50347086	1020181	1.51336	2.28872	0	1	0	0	0	0	0	0	0	1	1	1	1	0	1	0	1	5	1	CHEF
chr11	63202115	63202515	chr17	15082524	15084524	1006720	1.5129	3.68349	0	0	0	1	0	0	0	0	0	1	1	0	1	0	1	0	0	3	1	CHEF
chr13	56258078	56258478	chr5	134877977	134879977	1012012	1.51219	0.691181	0	1	0	0	0	0	0	0	0	1	1	1	1	0	1	0	1	5	1	CHEF
chr5	133718588	133719006	chr7	67380754	67382754	2034686	1.51177	2.51578	1	1	0	0	0	0	0	0	0	2	0	0	1	0	1	0	1	3	1	CHEF
chr11	117341195	117341625	chr17	75461505	75463505	2008927	1.50941	5.76866	0	1	0	1	0	0	0	0	0	2	1	0	0	0	0	0	1	2	1	CHEF
chr3	9101475	9101875	chr8	81191042	81193042	1026789	1.50935	3.08704	0	0	0	0	0	1	0	0	0	1	0	1	1	0	1	0	1	4	1	CHEF
chr12	107528313	107528989	chr14	99116625	99118625	4010731	1.50766	2.3012	1	1	1	1	0	0	0	0	0	4	1	0	0	0	0	0	1	2	1	CHEF
chr6	97396551	97396991	chr3	69336539	69338539	2036803	1.50424	2.11778	1	1	0	0	0	0	0	0	0	2	1	1	1	0	1	0	0	4	1	CHEF
chr14	64199697	64200097	chr8	10191573	10193573	1013874	1.50391	5.08828	0	0	1	0	0	0	0	0	0	1	0	0	0	0	1	0	1	2	1	CHEF
chr10	59539377	59539797	chr10	74543488	74545488	1003787	1.50279	3.95713	0	0	0	0	0	1	0	0	0	1	0	0	0	0	1	0	1	2	1	CHEF
chr19	30505405	30505932	chr10	54137224	54139224	3022308	1.49277	0.754896	1	1	1	0	0	0	0	0	0	3	0	0	1	0	0	0	1	2	1	CHEF
chr10	45009554	45009954	chr6	105921374	105923374	1003664	1.4885	1.28869	0	0	1	0	0	0	0	0	0	1	0	0	1	0	1	0	1	3	1	CHEF
chr6	31884708	31885120	chr7	131580100	131582100	1035728	1.48755	2.45334	0	1	0	0	0	0	0	0	0	1	1	1	1	0	0	0	1	4	1	CHEF
chr1	78568057	78568457	chr2	223617357	223619357	1001073	1.48743	1.05614	0	0	1	0	0	0	0	0	0	1	0	0	0	0	1	0	1	2	1	CHEF
chr3	33873385	33873892	chr3	180424865	180426865	3027106	1.48708	3.37617	1	1	1	0	0	0	0	0	0	3	1	1	1	0	1	0	1	5	1	CHEF
chr11	77947824	77948326	chr17	27312207	27314207	4007242	1.47309	2.92481	1	1	1	0	1	0	0	0	0	4	0	0	1	0	0	0	0	1	1	CHEF
chr4	153340871	153341302	chr1	4880471	4882471	3032056	1.46709	1.51371	1	1	1	0	0	0	0	0	0	3	0	0	1	0	0	0	0	1	1	CHEF
chr3	55787358	55787802	chr13	36044377	36046377	2027336	1.46455	1.10599	0	0	1	0	0	1	0	0	0	2	0	0	0	1	1	1	0	3	1	CHEF
chr15	41232668	41233068	chr8	107001226	107003226	1015007	1.46205	1.10945	0	0	1	0	0	0	0	0	0	1	0	0	1	0	0	0	1	2	1	CHEF
chr2	77506415	77506852	chr2	180414237	180416237	2024520	1.45924	1.91708	1	0	1	0	0	0	0	0	0	2	1	1	1	0	1	0	1	5	1	CHEF
chrX	58155260	58155660	chrX	136828492	136830492	1046490	1.45907	3.7712	0	0	1	0	0	0	0	0	0	1	0	0	1	0	0	0	1	2	1	CHEF
chr13	72345863	72346282	chr5	3123046	3125046	3012268	1.45673	4.93172	1	1	1	0	0	0	0	0	0	3	1	1	1	0	1	0	1	5	1	CHEF
chr9	32685637	32686168	chr11	128401775	128403775	3043998	1.45521	1.37712	1	1	1	0	0	0	0	0	0	3	1	1	1	0	1	0	1	5	1	CHEF
chr15	36827085	36827485	chr8	102005081	102007081	1014914	1.45186	1.62908	0	0	0	1	0	0	0	0	0	1	1	1	1	0	1	0	1	5	1	CHEF
chr2	146823331	146823972	chr20	21070002	21072002	3025537	1.45028	3.23021	1	1	1	0	0	0	0	0	0	3	0	0	1	0	1	0	0	2	1	CHEF
chr10	29594948	29595399	chr6	127397809	127399809	3003394	1.44892	1.01398	1	1	1	0	0	0	0	0	0	3	0	0	1	0	0	0	1	2	1	CHEF
chr4	109762671	109763089	chr1	51165103	51167103	3030193	1.44857	4.87754	1	1	1	0	0	0	0	0	0	3	1	1	1	0	1	0	1	5	1	CHEF
chr13	80962817	80963460	chr5	90575348	90577348	3012358	1.44807	1.70188	0	0	1	1	0	1	0	0	0	3	0	0	0	0	1	0	1	2	1	CHEF
chr11	89186804	89187254	chr17	54776089	54778089	3007661	1.44679	1.1668	0	0	1	0	0	1	0	0	1	3	0	0	1	0	0	1	1	3	1	CHEF
chr11	16534708	16535108	chr7	54848127	54850127	1005734	1.44574	2.83587	0	0	0	0	0	1	0	0	0	1	1	1	1	0	1	0	1	5	1	CHEF
chr9	68777693	68778093	chr15	61398804	61400804	1044982	1.44561	0.872963	0	1	0	0	0	0	0	0	0	1	0	0	1	0	0	0	1	2	1	CHEF
chr13	69703474	69704016	chr5	6490770	6492770	3012244	1.44559	1.05024	1	1	1	0	0	0	0	0	0	3	0	0	0	0	1	0	0	1	1	CHEF
chr2	28907747	28908794	chr9	135465380	135467380	4023527	1.44532	2.6408	1	1	0	1	0	1	0	0	0	4	1	0	1	0	1	0	0	3	1	CHEF
chr19	8976471	8976871	chr11	62327354	62329354	1021949	1.44504	2.57042	0	0	0	0	0	0	0	0	1	1	1	0	0	0	1	0	0	2	1	CHEF
chr12	80023232	80023650	chr14	69157203	69159203	3010170	1.44446	1.46292	1	1	1	0	0	0	0	0	0	3	1	0	0	0	0	0	1	2	1	CHEF
chr7	132247595	132247995	chr10	125779728	125781728	1040499	1.44424	6.9326	0	0	1	0	0	0	0	0	0	1	1	0	1	0	1	0	0	3	1	CHEF
chr1	172242278	172242678	chr1	160137890	160139890	1002482	1.44284	5.96949	0	0	0	0	0	0	0	0	1	1	1	1	1	1	1	0	1	6	1	CHEF
chr11	111843749	111844758	chr17	69028356	69030356	5008641	1.44284	1.41129	1	1	1	0	0	0	1	0	1	5	1	1	1	0	1	0	1	5	1	CHEF
chr1	41390256	41390663	chr2	104017451	104019451	2000483	1.43616	2.8352	1	1	0	0	0	0	0	0	0	2	1	0	1	0	1	0	0	3	1	CHEF
chr13	114158129	114158548	chr5	53177797	53179797	2012911	1.43385	3.04604	1	1	0	0	0	0	0	0	0	2	1	0	1	0	0	0	1	3	1	CHEF
chr9	57068382	57068782	chr15	75752517	75754517	1044549	1.4334	1.95622	0	0	0	0	0	0	0	0	1	1	1	1	0	0	0	0	0	2	1	CHEF
chr5	125134723	125135123	chr12	124996748	124998748	1034479	1.43319	5.06015	0	0	0	0	0	1	0	0	0	1	1	1	0	0	1	0	0	3	1	CHEF
chr2	45158440	45158885	chr2	145324604	145326604	3024015	1.42712	1.23188	1	1	1	0	0	0	0	0	0	3	1	1	1	0	1	0	1	5	1	CHEF
chr9	66228479	66229100	chr15	64264259	64266259	1044926	1.42693	3.05226	0	0	1	0	0	0	0	0	0	1	0	1	1	0	1	0	1	4	1	CHEF
chr13	29370870	29371309	chr6	21185381	21187381	3011358	1.42689	4.22334	1	1	1	0	0	0	0	0	0	3	1	1	1	0	1	0	1	5	1	CHEF
chr5	149031308	149031787	chr13	31018922	31020922	2035345	1.42649	1.99137	0	0	1	0	0	1	0	0	0	2	1	0	1	1	1	0	0	4	1	CHEF
chrX	71700750	71701440	chrX	150407557	150409557	4046533	1.4227	2.29474	1	1	1	0	0	0	0	0	1	4	1	0	1	0	0	0	0	2	1	CHEF
chr2	118532885	118533285	chr15	40383553	40385553	1024983	1.42268	4.83801	0	0	0	1	0	0	0	0	0	1	0	0	1	0	1	0	0	2	1	CHEF
chr5	133675651	133676069	chr7	67479450	67481450	3034684	1.41932	1.61357	1	1	1	0	0	0	0	0	0	3	1	0	1	0	0	0	1	3	1	CHEF
chr1	170521525	170521973	chr1	162114263	162116263	3002416	1.41864	3.2125	0	1	1	1	0	0	0	0	0	3	0	0	1	0	0	0	0	1	1	CHEF
chr8	127267985	127268385	chr10	34815751	34817751	1043519	1.41805	3.15689	0	1	0	0	0	0	0	0	0	1	0	0	1	0	1	0	1	3	1	CHEF
chr4	81628411	81628932	chr9	13491172	13493172	2029782	1.41676	5.31593	0	1	1	0	0	0	0	0	0	2	1	1	1	0	0	0	1	4	1	CHEF
chr5	119055394	119055915	chr12	115944884	115946884	5034178	1.41516	3.46203	1	1	1	1	0	0	0	0	1	5	1	1	1	1	1	0	1	6	1	CHEF
chr5	100343039	100343507	chr4	83706901	83708901	2033486	1.41077	0.838153	0	1	0	1	0	0	0	0	0	2	0	1	1	0	1	0	1	4	1	CHEF
chr11	80335722	80336131	chr17	30629420	30631420	2007364	1.4084	4.49239	1	1	0	0	0	0	0	0	0	2	1	1	1	0	1	0	1	5	1	CHEF
chr5	119610837	119611237	chr12	115189185	115191185	1034195	1.40641	0.776817	0	0	0	0	0	0	0	0	1	1	0	0	0	0	1	0	1	2	1	CHEF
chr5	86786799	86787228	chr4	69238277	69240277	3033317	1.40519	2.65748	1	1	1	0	0	0	0	0	0	3	0	0	0	1	1	0	1	3	1	CHEF
chr1	167448521	167448994	chr1	165529400	165531400	2002385	1.40478	0.825508	0	1	1	0	0	0	0	0	0	2	0	0	1	0	0	0	1	2	1	CHEF
chr4	152286267	152286696	chr1	6304954	6306954	3032019	1.40254	2.05691	0	0	1	0	1	1	0	0	0	3	0	0	1	1	0	0	0	2	1	CHEF
chr1	59516050	59516491	chr2	202928248	202930248	2000703	1.40045	1.7312	0	0	1	0	0	0	0	0	1	2	0	0	1	0	1	0	1	3	1	CHEF
chr10	44488881	44489281	chr6	106498343	106500343	1003652	1.399	1.57834	0	1	0	0	0	0	0	0	0	1	0	0	1	0	1	0	1	3	1	CHEF
chr2	147906366	147906803	chr20	22410604	22412604	3025557	1.39857	0.8971	0	1	1	1	0	0	0	0	0	3	1	1	1	0	0	0	0	3	1	CHEF
chr1	189913107	189913507	chr1	214469428	214471428	1002830	1.3972	1.49389	0	0	0	1	0	0	0	0	0	1	0	0	1	0	1	0	0	2	1	CHEF
chr15	13212247	13212706	chr5	31161016	31163016	2014729	1.39362	1.41138	0	1	1	0	0	0	0	0	0	2	0	0	1	0	1	0	1	3	1	CHEF
chr12	3109842	3110277	chr7	92672631	92674631	3009210	1.39356	3.04733	0	1	1	0	0	1	0	0	0	3	0	0	1	0	1	0	1	3	1	CHEF
chr9	71231779	71232344	chr15	58341165	58343165	2045038	1.38755	0.893623	0	1	1	0	0	0	0	0	0	2	0	0	1	0	1	0	1	3	1	CHEF
chr6	99013767	99014191	chr3	71099191	71101191	1036827	1.38291	4.02377	0	0	1	0	0	0	0	0	0	1	0	0	1	0	1	0	0	2	1	CHEF
chr18	24402185	24402643	chr18	33430440	33432440	3020471	1.38184	6.11217	1	1	1	0	0	0	0	0	0	3	1	1	1	0	1	0	1	5	1	CHEF
chr6	16365425	16365841	chr7	115165554	115167554	2035526	1.37952	2.64155	1	1	0	0	0	0	0	0	0	2	1	1	1	0	1	0	1	5	1	CHEF
chr4	91447807	91448293	chr9	23906392	23908392	3029909	1.37657	1.869	1	1	1	0	0	0	0	0	0	3	1	1	0	0	1	0	0	3	1	CHEF
chr1	18639300	18639812	chr6	50377493	50379493	3000196	1.3765	0.974978	1	1	1	0	0	0	0	0	0	3	0	0	1	0	0	0	1	2	1	CHEF
chr17	84096434	84096887	chr2	43327032	43329032	2020013	1.37557	3.74129	0	0	1	0	0	1	0	0	0	2	1	1	1	0	0	0	1	4	1	CHEF
chr9	43194629	43195029	chr11	120118590	120120590	1044161	1.37055	3.6071	0	0	1	0	0	0	0	0	0	1	0	1	1	0	0	0	0	2	1	CHEF
chr5	3395086	3395486	chr7	92397122	92399122	1032218	1.36942	3.64625	1	0	0	0	0	0	0	0	0	1	0	0	1	0	0	0	0	1	1	CHEF
chr10	90709485	90709947	chr12	99419678	99421678	3004771	1.36809	1.30832	1	1	1	0	0	0	0	0	0	3	1	1	1	0	1	0	1	5	1	CHEF
chr11	79615573	79615973	chr17	29751427	29753427	1007324	1.36656	1.81338	0	0	0	1	0	0	0	0	0	1	1	1	1	0	1	0	1	5	1	CHEF
chr1	170477655	170478083	chr1	162167101	162169101	3002415	1.36531	3.18658	1	1	1	0	0	0	0	0	0	3	1	0	1	0	0	0	1	3	1	CHEF
chr9	35402640	35403063	chr11	125951525	125953525	2044028	1.3643	3.34551	1	1	0	0	0	0	0	0	0	2	1	1	0	0	0	0	0	2	1	CHEF
chr2	147905368	147906097	chr20	22409711	22411711	2025556	1.36213	0.986361	0	1	1	0	0	0	0	0	0	2	1	1	1	0	1	0	1	5	1	CHEF
chr7	73222539	73222942	chr15	93822503	93824503	2039315	1.3607	3.72631	1	1	0	0	0	0	0	0	0	2	0	0	1	0	0	0	1	2	1	CHEF
chr1	77629831	77630281	chr2	222544461	222546461	3001060	1.36045	1.59085	1	1	1	0	0	0	0	0	0	3	0	0	1	0	1	0	0	2	1	CHEF
chr15	42673991	42674427	chr8	108506416	108508416	2015018	1.35722	3.95835	1	1	0	0	0	0	0	0	0	2	1	0	1	0	1	0	1	4	1	CHEF
chr1	190448209	190448609	chr1	213843019	213845019	1002840	1.35308	1.60906	0	0	1	0	0	0	0	0	0	1	1	1	1	0	1	0	1	5	1	CHEF
chr5	81661876	81662339	chr4	62776119	62778119	3033298	1.34765	4.85789	1	1	1	0	0	0	0	0	0	3	1	1	1	0	1	0	1	5	1	CHEF
chr4	33903933	33904399	chr6	88892338	88894338	2029154	1.34437	1.63294	0	1	1	0	0	0	0	0	0	2	0	0	1	0	0	0	0	1	1	CHEF
chr5	67230536	67231278	chr4	41882782	41884782	2033108	1.34402	1.02508	0	0	0	0	0	1	0	0	1	2	0	0	1	0	0	0	1	2	1	CHEF
chr18	34551654	34552130	chr5	137429999	137431999	3020599	1.34399	1.65112	1	1	1	0	0	0	0	0	0	3	1	1	1	0	1	1	1	6	1	CHEF
chr8	106599510	106600002	chr16	68765657	68767657	2042818	1.33769	4.0766	1	1	0	0	0	0	0	0	0	2	0	0	1	0	1	0	1	3	1	CHEF
chr13	114406411	114407378	chr5	52840487	52842487	4012920	1.33747	4.10093	1	1	1	0	0	1	0	0	0	4	1	1	1	0	1	0	1	5	1	CHEF
chr7	79592074	79592489	chr15	90012415	90014415	2039415	1.3351	1.45291	0	0	1	0	0	1	0	0	0	2	1	0	1	0	0	0	1	3	1	CHEF
chr4	65238519	65238982	chr9	119033534	119035534	3029722	1.33473	1.01606	1	1	1	0	0	0	0	0	0	3	1	1	1	1	1	1	1	7	1	CHEF
chrX	60772343	60773002	chrX	139436101	139438101	5046505	1.33308	1.65483	1	1	1	1	0	0	0	0	1	5	1	0	1	0	0	0	1	3	1	CHEF
chr2	181773489	181773889	chr20	62807443	62809443	1026721	1.32766	3.02242	1	0	0	0	0	0	0	0	0	1	1	1	1	0	0	0	0	3	1	CHEF
chr17	10228132	10228532	chr6	163963484	163965484	1018189	1.32667	2.33594	1	0	0	0	0	0	0	0	0	1	1	1	1	0	1	0	1	5	1	CHEF
chr8	89245203	89245603	chr16	51392258	51394258	1042489	1.32457	1.96349	0	0	1	0	0	0	0	0	0	1	1	1	1	0	1	0	1	5	1	CHEF
chr11	24110716	24111130	chr2	60746944	60748944	2005911	1.32452	3.33446	1	1	0	0	0	0	0	0	0	2	1	0	0	0	0	0	0	1	1	CHEF
chr8	95199767	95200167	chr16	57892550	57894550	1042637	1.32288	1.10113	0	0	0	1	0	0	0	0	0	1	0	0	1	0	0	0	1	2	1	CHEF
chr8	104350020	104350428	chr16	66649704	66651704	1042711	1.32267	1.25408	0	0	0	0	0	1	0	0	0	1	0	0	0	0	1	0	1	2	1	CHEF
chr3	53063396	53063796	chr13	40138950	40140950	1027302	1.32078	3.4637	0	0	1	0	0	0	0	0	0	1	1	1	1	0	1	0	1	5	1	CHEF
chr2	7778600	7779000	chr10	10206559	10208559	1023128	1.32032	5.25415	0	0	1	0	0	0	0	0	0	1	1	1	1	0	1	0	0	4	1	CHEF
chr13	95556830	95557230	chr5	76074579	76076579	1012518	1.31938	2.2163	1	0	0	0	0	0	0	0	0	1	1	0	1	0	0	0	0	2	1	CHEF
chr7	79497764	79498164	chr15	89902831	89904831	1039404	1.31879	1.06623	0	1	0	0	0	0	0	0	0	1	0	1	1	0	0	0	1	3	1	CHEF
chr2	172728301	172728828	chr20	55499389	55501389	2026491	1.31733	1.78449	0	0	1	0	0	1	0	0	0	2	1	1	1	0	1	0	1	5	1	CHEF
chr12	56520993	56521483	chr14	36973819	36975819	2009823	1.31673	0.850374	0	0	1	0	0	1	0	0	0	2	1	1	1	0	0	0	1	4	1	CHEF
chr5	37829235	37830324	chr4	4854827	4856827	4032807	1.3162	0.903155	1	1	0	0	1	0	0	0	1	4	0	0	0	0	0	0	1	1	1	CHEF
chr7	83037036	83037634	chr15	82199668	82201668	3039567	1.31342	0.948115	0	1	1	1	0	0	0	0	0	3	0	0	1	0	0	0	1	2	1	CHEF
chr14	13349225	13349625	chr3	63328645	63330645	1013061	1.31323	3.02079	1	0	0	0	0	0	0	0	0	1	0	0	1	0	1	0	0	2	1	CHEF
chr17	47914691	47915132	chr6	41522541	41524541	3019426	1.31028	1.77445	1	1	1	0	0	0	0	0	0	3	1	0	1	0	0	0	1	3	1	CHEF
chr13	40969801	40970201	chr6	10638613	10640613	1011566	1.3095	1.19687	1	0	0	0	0	0	0	0	0	1	0	1	1	0	1	0	1	4	1	CHEF
chr4	8943877	8944277	chr8	61861471	61863471	1028928	1.30736	1.88856	0	0	1	0	0	0	0	0	0	1	0	0	0	0	1	0	1	2	1	CHEF
chr6	23410216	23410627	chr7	122110122	122112122	3035579	1.30687	1.51489	1	1	1	0	0	0	0	0	0	3	1	0	1	0	0	0	0	2	1	CHEF
chr8	30648490	30648952	chr8	33890565	33892565	3041354	1.30578	1.30199	1	1	1	0	0	0	0	0	0	3	0	0	0	0	1	0	0	1	1	CHEF
chr5	66391308	66391708	chr4	40935386	40937386	1033083	1.30253	1.47941	0	0	1	0	0	0	0	0	0	1	1	0	1	0	1	0	1	4	1	CHEF
chr1	38394476	38394876	chr2	100437563	100439563	1000430	1.29911	1.87547	0	0	1	0	0	0	0	0	0	1	1	0	1	0	0	0	0	2	1	CHEF
chr15	36827917	36828317	chr8	102006144	102008144	1014915	1.29583	1.26619	0	0	0	0	0	0	0	0	1	1	1	1	1	0	1	0	1	5	1	CHEF
chr6	48623521	48623921	chr7	150097160	150099160	1035978	1.29298	7.89571	0	0	0	0	0	0	0	0	1	1	0	0	0	0	0	0	0	0	1	CHEF
chr11	38121163	38121611	chr5	165514669	165516669	3006121	1.29284	1.54528	1	1	1	0	0	0	0	0	0	3	1	1	1	0	1	0	1	5	1	CHEF
chr18	28522268	28522730	chr18	37791172	37793172	2020512	1.29277	2.3547	1	0	1	0	0	0	0	0	0	2	0	0	1	0	1	0	1	3	1	CHEF
chr4	115962716	115963405	chr1	46931455	46933455	2030269	1.29111	1.38908	0	0	1	0	0	1	0	0	0	2	1	0	0	1	0	1	1	4	1	CHEF
chr5	120338060	120338926	chr12	114024520	114026520	2034223	1.29022	7.16576	0	0	0	1	0	0	0	0	1	2	1	1	1	1	1	0	1	6	1	CHEF
chr7	112883884	112884284	chr11	12935319	12937319	1040020	1.2896	3.75262	0	0	1	0	0	0	0	0	0	1	0	0	0	0	1	0	1	2	1	CHEF
chr14	12337972	12338398	chr3	62350458	62352458	1013048	1.28898	1.07855	0	0	1	0	0	0	0	0	0	1	0	1	1	0	1	0	0	3	1	CHEF
chr14	48748403	48748823	chr14	57362913	57364913	2013555	1.28777	1.88856	1	0	0	1	0	0	0	0	0	2	1	0	1	0	1	0	1	4	1	CHEF
chr18	25590203	25590630	chr18	34973131	34975131	2020502	1.28771	1.3412	0	0	1	0	0	1	0	0	0	2	1	1	0	0	0	0	0	2	1	CHEF
chr11	44841678	44842094	chr5	158295342	158297342	2006177	1.28734	1.41097	1	1	0	0	0	0	0	0	0	2	1	1	0	0	1	0	0	3	1	CHEF
chr5	147304221	147305290	chr13	28539713	28541713	3035274	1.28723	1.07335	1	0	1	0	0	1	0	0	0	3	1	1	1	1	1	0	1	6	1	CHEF
chr7	96168932	96169332	chr11	79183393	79185393	1039664	1.28717	4.95604	1	0	0	0	0	0	0	0	0	1	1	1	1	0	1	0	1	5	1	CHEF
chr11	38067678	38068078	chr5	165592303	165594303	1006120	1.28275	1.06587	0	1	0	0	0	0	0	0	0	1	0	1	1	0	1	0	1	4	1	CHEF
chr4	123162482	123162882	chr1	40176348	40178348	1030533	1.2809	0.602926	0	0	1	0	0	0	0	0	0	1	1	1	1	0	0	0	1	4	1	CHEF
chr5	111170381	111170789	chr22	28582775	28584775	2033751	1.28069	1.16162	1	1	0	0	0	0	0	0	0	2	1	1	1	0	0	0	1	4	1	CHEF
chr9	99872487	99872941	chr3	137485673	137487673	3045464	1.2805	1.20014	1	1	1	0	0	0	0	0	0	3	1	1	1	0	0	0	1	4	1	CHEF
chr7	96672599	96672999	chr11	78639322	78641322	1039676	1.27996	1.13202	0	0	1	0	0	0	0	0	0	1	1	1	1	0	1	0	1	5	1	CHEF
chr2	17852647	17853090	chr10	21570088	21572088	2023224	1.27924	6.03955	1	1	0	0	0	0	0	0	0	2	1	1	1	0	1	0	1	5	1	CHEF
chr13	84571434	84571834	chr5	87239477	87241477	1012387	1.278	1.63978	0	1	0	0	0	0	0	0	0	1	1	1	1	0	1	0	1	5	1	CHEF
chr6	64728565	64729765	chr4	94748946	94750946	3036219	1.27556	2.04867	0	1	1	0	0	1	0	0	0	3	1	0	1	1	0	0	0	3	1	CHEF
chr4	122983433	122983854	chr1	40387250	40389250	2030522	1.2724	1.75556	0	0	1	0	0	1	0	0	0	2	0	0	0	1	1	0	1	3	1	CHEF
chr19	53673878	53674278	chr10	112399484	112401484	1022881	1.27225	1.3322	0	0	0	1	0	0	0	0	0	1	0	0	1	0	1	0	1	3	1	CHEF
chr5	112049875	112050275	chr22	27288788	27290788	1033791	1.26617	1.45003	0	0	0	0	0	0	0	0	1	1	1	0	0	0	0	0	1	2	1	CHEF
chr7	144822481	144822881	chr11	69656438	69658438	1040848	1.26536	1.35476	0	0	0	0	0	1	0	0	0	1	1	0	1	0	0	0	1	3	1	CHEF
chr5	55761739	55762186	chr4	28683643	28685643	3032958	1.2647	3.27763	1	1	1	0	0	0	0	0	0	3	1	1	1	0	1	0	1	5	1	CHEF
chr8	40192190	40192623	chr8	16695106	16697106	3041517	1.26302	1.45291	1	1	1	0	0	0	0	0	0	3	0	0	1	0	0	0	1	2	1	CHEF
chr16	73863770	73864170	chr3	77734896	77736896	1017715	1.26235	2.23182	0	1	0	0	0	0	0	0	0	1	0	0	1	0	1	0	1	3	1	CHEF
chr9	24878622	24879022	chr7	35405298	35407298	1043890	1.26234	1.96432	0	0	0	0	0	0	0	0	1	1	1	0	1	0	0	0	0	2	1	CHEF
chr6	88235878	88236408	chr3	128150951	128152951	3036602	1.25918	2.71164	1	1	0	0	0	1	0	0	0	3	1	0	0	0	0	0	0	1	1	CHEF
chr14	98449532	98449978	chr13	72693908	72695908	3014252	1.25772	2.78946	1	1	1	0	0	0	0	0	0	3	0	0	1	0	1	0	1	3	1	CHEF
chr18	29579041	29579441	chr18	38890734	38892734	1020514	1.25756	4.23165	1	0	0	0	0	0	0	0	0	1	1	1	1	0	1	0	1	5	1	CHEF
chr16	33734498	33734982	chr3	124724779	124726779	2017339	1.25754	0.873189	0	1	1	0	0	0	0	0	0	2	0	0	1	0	0	0	1	2	1	CHEF
chr4	136104754	136105154	chr1	23924227	23926227	1031315	1.25423	6.35445	0	0	0	0	0	0	0	0	1	1	1	1	1	1	1	0	1	6	1	CHEF
chr11	117129526	117130028	chr17	75159295	75161295	2008910	1.2539	2.03357	0	0	0	0	0	1	0	0	1	2	1	0	1	0	0	0	1	3	1	CHEF
chr5	38709172	38709572	chr4	10497560	10499560	1032837	1.25222	2.42471	1	0	0	0	0	0	0	0	0	1	1	1	1	0	1	0	1	5	1	CHEF
chr16	8188573	8188973	chr16	8420103	8422103	1016647	1.25218	1.73808	0	1	0	0	0	0	0	0	0	1	1	0	1	0	1	0	1	4	1	CHEF
chr7	73595149	73595549	chr15	93374131	93376131	1039335	1.25151	3.46836	0	0	1	0	0	0	0	0	0	1	1	0	1	1	1	0	1	5	1	CHEF
chr6	98526917	98527317	chr3	70581092	70583092	1036823	1.25132	1.77564	0	1	0	0	0	0	0	0	0	1	1	1	1	0	1	0	1	5	1	CHEF
chr5	101537751	101538424	chr4	85299221	85301221	3033510	1.24788	2.99693	1	1	1	0	0	0	0	0	0	3	1	1	1	0	1	0	1	5	1	CHEF
chr19	44659400	44659800	chr10	102401238	102403238	1022621	1.24734	1.82899	0	0	0	1	0	0	0	0	0	1	1	0	1	0	1	0	1	4	1	CHEF
chr11	19026543	19026943	chr2	66652980	66654980	1005762	1.24596	1.45546	0	0	1	0	0	0	0	0	0	1	0	0	0	0	1	0	1	2	1	CHEF
chr18	47569297	47570031	chr5	116108659	116110659	2020946	1.24414	4.51413	1	0	1	0	0	0	0	0	0	2	0	0	1	0	1	0	0	2	1	CHEF
chr2	6046777	6047177	chr10	11977637	11979637	1023105	1.24398	4.09143	1	0	0	0	0	0	0	0	0	1	1	1	0	0	0	0	0	2	1	CHEF
chr9	117072332	117072814	chr3	29516446	29518446	2045947	1.24378	4.51581	1	1	0	0	0	0	0	0	0	2	1	1	1	0	1	0	1	5	1	CHEF
chr2	142334558	142334958	chr20	15985255	15987255	1025455	1.24356	2.3081	1	0	0	0	0	0	0	0	0	1	0	1	1	0	1	0	1	4	1	CHEF
chr9	102762980	102763431	chr3	134045522	134047522	2045505	1.24204	3.03944	0	0	1	0	0	0	0	0	1	2	0	0	1	0	1	0	0	2	1	CHEF
chr3	100034565	100034983	chr1	118615713	118617713	2028019	1.24161	1.22122	1	1	0	0	0	0	0	0	0	2	0	0	1	0	1	0	1	3	1	CHEF
chr11	54312051	54312474	chr5	131338138	131340138	2006414	1.24068	1.08419	1	0	0	1	0	0	0	0	0	2	1	0	0	1	0	1	1	4	1	CHEF
chr13	83734212	83734612	chr5	87966147	87968147	1012378	1.24019	1.28675	0	1	0	0	0	0	0	0	0	1	0	1	0	0	1	0	1	3	1	CHEF
chr16	24517627	24518092	chr3	188015053	188017053	3017116	1.23917	1.34445	0	0	0	1	1	1	0	0	0	3	0	1	1	0	0	0	0	2	1	CHEF
chr6	51178454	51178854	chr7	25901258	25903258	1036027	1.23811	1.75109	0	0	1	0	0	0	0	0	0	1	1	0	1	1	1	1	1	6	1	CHEF
chr14	99944109	99944509	chr13	74340453	74342453	1014294	1.23743	1.12387	1	0	0	0	0	0	0	0	0	1	1	0	0	0	1	0	0	2	1	CHEF
chr4	148806743	148807220	chr1	10853087	10855087	2031839	1.23559	1.2931	0	0	1	0	0	1	0	0	0	2	0	0	1	0	0	0	1	2	1	CHEF
chr5	112237397	112237801	chr22	27043142	27045142	1033800	1.23535	2.93025	0	0	0	0	0	1	0	0	0	1	0	1	1	0	1	0	0	3	1	CHEF
chr4	6944884	6945372	chr8	59976539	59978539	3028899	1.23405	3.66677	1	1	1	0	0	0	0	0	0	3	1	1	1	0	1	0	1	5	1	CHEF
chr9	74848233	74848730	chr15	53096175	53098175	3045109	1.23328	2.65087	1	1	1	0	0	0	0	0	0	3	1	0	1	0	1	0	0	3	1	CHEF
chr2	45037629	45038078	chr2	145201192	145203192	3024009	1.23328	1.70392	1	1	1	0	0	0	0	0	0	3	1	1	1	0	1	0	1	5	1	CHEF
chr10	119483764	119484218	chr12	67428187	67430187	1005150	1.23252	0.718612	0	0	1	0	0	0	0	0	0	1	0	0	0	0	1	0	1	2	1	CHEF
chr4	69892764	69893250	chr9	122845134	122847134	4029737	1.2316	1.25158	1	1	1	0	0	0	0	0	1	4	0	0	1	0	0	0	0	1	1	CHEF
chr3	155039082	155039686	chr1	74710213	74712213	2028821	1.23136	0.771952	0	0	1	1	0	0	0	0	0	2	1	1	1	0	1	0	1	5	1	CHEF
chr5	66532434	66532834	chr4	41126411	41128411	1033090	1.22965	2.79828	0	0	0	1	0	0	0	0	0	1	0	0	1	0	1	0	1	3	1	CHEF
chr2	74672477	74673310	chr2	176961198	176963198	4024436	1.22859	1.71713	1	1	0	1	0	1	0	0	0	4	1	1	1	0	1	0	1	5	1	CHEF
chr2	57378354	57378802	chr2	157448711	157450711	2024102	1.2284	2.06517	1	0	1	0	0	0	0	0	0	2	1	0	1	0	1	0	0	3	1	CHEF
chr6	30083198	30083598	chr7	129288275	129290275	1035665	1.22587	2.39229	0	0	1	0	0	0	0	0	0	1	0	0	1	0	1	0	1	3	1	CHEF
chr5	48263392	48263792	chr4	20573809	20575809	1032884	1.22538	2.07799	0	1	0	0	0	0	0	0	0	1	0	0	1	0	1	0	1	3	1	CHEF
chr9	62518339	62518739	chr15	68891359	68893359	1044767	1.22239	2.26814	0	0	0	1	0	0	0	0	0	1	1	1	0	0	0	0	0	2	1	CHEF
chr10	84859133	84859589	chr12	107103101	107105101	2004653	1.21794	1.93947	0	1	1	0	0	0	0	0	0	2	0	0	1	0	0	0	1	2	1	CHEF
chr9	112117655	112118055	chr3	35785713	35787713	1045830	1.21781	0.768897	0	1	0	0	0	0	0	0	0	1	1	0	1	0	0	0	0	2	1	CHEF
chr6	99804252	99804652	chr3	71923724	71925724	1036843	1.2177	3.86016	0	0	1	0	0	0	0	0	0	1	0	1	1	0	0	0	1	3	1	CHEF
chr3	17489712	17490128	chr8	64991451	64993451	3026898	1.21711	1.20046	1	1	0	1	0	0	0	0	0	3	1	1	0	0	0	0	0	2	1	CHEF
chr19	46435375	46435940	chr10	104324403	104326403	3022743	1.21674	0.663072	0	1	1	0	0	1	0	0	0	3	1	1	1	0	0	0	1	4	1	CHEF
chr4	100779042	100779498	chr1	64937792	64939792	2030003	1.21627	4.92807	1	0	1	0	0	0	0	0	0	2	1	1	1	0	1	0	1	5	1	CHEF
chr8	122228728	122229240	chr16	88447280	88449280	3043307	1.21567	1.9898	1	1	1	0	0	0	0	0	0	3	1	0	1	0	1	0	0	3	1	CHEF
chr15	7480018	7480597	chr5	38166955	38168955	2014609	1.21366	1.54831	1	0	1	0	0	0	0	0	0	2	1	0	1	0	0	0	0	2	1	CHEF
chr10	44515817	44516237	chr6	106452096	106454096	2003654	1.21317	1.42356	1	0	1	0	0	0	0	0	0	2	0	0	1	0	1	0	1	3	1	CHEF
chr8	96296635	96297035	chr16	59203147	59205147	1042682	1.2129	3.87704	0	1	0	0	0	0	0	0	0	1	1	1	1	0	1	0	1	5	1	CHEF
chr6	28724321	28724757	chr7	127543426	127545426	3035608	1.21246	2.36534	1	1	1	0	0	0	0	0	0	3	0	0	0	0	1	0	0	1	1	CHEF
chr4	71484165	71484565	chr9	83726730	83728730	1029744	1.21089	1.69784	0	0	1	0	0	0	0	0	0	1	0	0	1	0	1	0	0	2	1	CHEF
chr13	29610054	29610454	chr6	20868204	20870204	1011360	1.21084	2.1042	0	0	1	0	0	0	0	0	0	1	0	1	0	0	1	0	0	2	1	CHEF
chr1	66266308	66266758	chr2	210383770	210385770	2000811	1.21049	0.894408	0	1	1	0	0	0	0	0	0	2	1	1	1	0	1	0	1	5	1	CHEF
chr5	123324239	123324639	chr12	122438516	122440516	1034400	1.20905	1.6683	0	0	1	0	0	0	0	0	0	1	1	1	1	0	0	0	0	3	1	CHEF
chr8	69149153	69149553	chr8	20125374	20127374	1041826	1.20804	5.30496	0	0	1	0	0	0	0	0	0	1	1	1	1	0	1	0	1	5	1	CHEF
chr10	91270181	91270581	chr12	98792401	98794401	1004783	1.2069	2.23046	0	0	1	0	0	0	0	0	0	1	0	0	0	0	1	0	1	2	1	CHEF
chr14	122267629	122268033	chr13	100355399	100357399	3014526	1.20399	6.5691	1	1	1	0	0	0	0	0	0	3	1	0	1	0	1	0	1	4	1	CHEF
chr5	33705092	33705724	chr4	1778902	1780902	3032673	1.20245	3.42895	0	0	1	0	0	1	0	0	1	3	1	0	1	0	0	1	1	4	1	CHEF
chr14	122480427	122480827	chr13	100638317	100640317	1014551	1.20189	1.82304	0	0	1	0	0	0	0	0	0	1	0	0	1	0	1	0	1	3	1	CHEF
chr3	38546952	38547352	chr4	125705849	125707849	1027203	1.20125	1.11943	0	0	1	0	0	0	0	0	0	1	0	0	1	0	0	0	1	2	1	CHEF
chr1	36589118	36589518	chr2	97572268	97574268	1000379	1.20115	3.44437	0	0	0	0	0	0	0	0	1	1	0	0	1	1	0	0	1	3	1	CHEF
chr7	116033688	116034088	chr11	16627637	16629637	1040086	1.19872	1.09179	0	0	0	0	0	1	0	0	0	1	0	0	1	0	1	0	1	3	1	CHEF
chr15	98001735	98002135	chr12	48394405	48396405	1016186	1.19711	0.941187	0	0	0	0	0	1	0	0	0	1	0	0	1	0	0	0	1	2	1	CHEF
chr11	112501825	112502251	chr17	69823578	69825578	2008644	1.19678	2.90127	1	1	0	0	0	0	0	0	0	2	1	1	1	1	1	0	1	6	1	CHEF
chr18	63496258	63496658	chr18	11260622	11262622	1021123	1.19656	1.09198	1	0	0	0	0	0	0	0	0	1	0	1	1	0	1	0	1	4	1	CHEF
chr13	94575876	94576369	chr5	77288804	77290804	3012475	1.19608	0.817058	1	1	1	0	0	0	0	0	0	3	0	0	1	0	0	0	0	1	1	CHEF
chr13	90143295	90143715	chr5	82322004	82324004	2012417	1.19548	5.45163	0	1	1	0	0	0	0	0	0	2	0	1	1	0	1	0	1	4	1	CHEF
chr10	105509103	105509503	chr12	83149394	83151394	1004949	1.19509	0.760771	0	0	1	0	0	0	0	0	0	1	1	0	1	0	1	0	1	4	1	CHEF
chr6	52153970	52154454	chr7	27130674	27132674	3036064	1.19457	1.32989	1	1	1	0	0	0	0	0	0	3	1	1	1	0	1	0	1	5	1	CHEF
chr9	120619571	120620071	chr3	40656167	40658167	3046046	1.19037	2.33004	1	0	1	0	0	1	0	0	0	3	1	0	0	0	1	1	0	3	1	CHEF
chr2	148039930	148040340	chr20	22558146	22560146	1025559	1.18906	1.80048	0	0	0	0	0	1	0	0	0	1	1	1	1	1	0	0	1	5	1	CHEF
chr10	60607015	60607523	chr10	73255811	73257811	3003844	1.18834	0.728105	0	1	1	0	0	0	0	0	1	3	0	0	1	0	0	0	0	1	1	CHEF
chr11	39596513	39596945	chr5	163924584	163926584	2006122	1.18653	2.83806	1	1	0	0	0	0	0	0	0	2	1	1	1	0	1	0	1	5	1	CHEF
chr9	70223201	70223700	chr15	59645435	59647435	2045010	1.18479	5.96692	1	0	1	0	0	0	0	0	0	2	1	1	1	0	1	0	1	5	1	CHEF
chr18	9779006	9779406	chr18	419943	421943	1020281	1.18402	1.39667	1	0	0	0	0	0	0	0	0	1	1	1	0	0	0	0	0	2	1	CHEF
chr3	51558235	51558635	chr4	140474547	140476547	1027272	1.18081	0.994747	0	0	0	1	0	0	0	0	0	1	0	0	1	0	0	0	1	2	1	CHEF
chr9	112118310	112118776	chr3	35785142	35787142	3045831	1.17836	0.832131	1	1	1	0	0	0	0	0	0	3	1	0	1	0	0	0	0	2	1	CHEF
chr1	59314970	59315418	chr2	202722698	202724698	2000689	1.17574	2.28323	1	1	0	0	0	0	0	0	0	2	0	0	0	0	1	0	1	2	1	CHEF
chr8	57722764	57723164	chr4	174012732	174014732	1041704	1.17494	2.38565	0	0	1	0	0	0	0	0	0	1	1	1	1	0	1	0	0	4	1	CHEF
chr14	120033421	120033855	chr13	97651647	97653647	3014452	1.17	0.617962	1	1	1	0	0	0	0	0	0	3	0	0	0	0	1	0	0	1	1	CHEF
chr16	22608164	22608564	chr3	186020880	186022880	1017079	1.1685	1.28437	0	0	1	0	0	0	0	0	0	1	0	0	1	0	0	0	1	2	1	CHEF
chr12	27064948	27065406	chr2	6208657	6210657	3009515	1.16813	0.968549	1	1	1	0	0	0	0	0	0	3	1	0	0	0	0	0	1	2	1	CHEF
chr4	44920804	44921226	chr9	37339027	37341027	3029351	1.1642	1.00656	1	1	1	0	0	0	0	0	0	3	1	0	1	0	1	0	1	4	1	CHEF
chr2	38223427	38223827	chr9	126624630	126626630	1023951	1.16338	2.12819	0	1	0	0	0	0	0	0	0	1	1	1	1	0	1	0	1	5	1	CHEF
chr9	32449941	32450520	chr11	128653433	128655433	3043993	1.16333	1.93947	1	1	1	0	0	0	0	0	0	3	1	1	1	0	1	0	1	5	1	CHEF
chr9	115803126	115803526	chr3	31049854	31051854	1045926	1.16273	0.858911	0	0	0	1	0	0	0	0	0	1	1	0	0	0	1	0	1	3	1	CHEF
chr2	4221758	4222197	chr10	14135355	14137355	2023048	1.15987	1.54348	1	0	1	0	0	0	0	0	0	2	0	0	1	0	0	0	1	2	1	CHEF
chr1	185149228	185149635	chr1	220512681	220514681	2002754	1.1543	4.89195	1	1	0	0	0	0	0	0	0	2	0	0	0	0	0	0	0	0	1	CHEF
chr18	47608935	47609335	chr5	116149912	116151912	1020948	1.15419	4.20381	0	1	0	0	0	0	0	0	0	1	1	1	0	0	0	0	1	3	1	CHEF
chr4	55519690	55520090	chr9	110234363	110236363	1029558	1.15271	2.16696	1	0	0	0	0	0	0	0	0	1	1	1	1	0	1	0	1	5	1	CHEF
chr10	42591684	42592094	chr6	108477973	108479973	2003589	1.14906	0.838153	0	0	1	0	0	1	0	0	0	2	0	1	1	1	0	0	0	3	1	CHEF
chr15	103183805	103184249	chr12	54610858	54612858	2016522	1.14785	1.27206	1	0	1	0	0	0	0	0	0	2	1	0	0	1	0	0	0	2	1	CHEF
chr2	60122135	60122535	chr2	160468238	160470238	1024155	1.14741	1.69819	0	0	1	0	0	0	0	0	0	1	0	0	1	0	1	0	0	2	1	CHEF
chr11	80323277	80323677	chr17	30614926	30616926	1007362	1.14686	3.65792	0	0	1	0	0	0	0	0	0	1	1	1	1	0	0	0	1	4	1	CHEF
chr8	69156070	69156470	chr8	20132148	20134148	1041827	1.14495	2.19952	0	0	0	0	0	0	0	0	1	1	1	1	0	0	0	0	0	2	1	CHEF
chr18	47647533	47647933	chr5	116199350	116201350	1020949	1.14411	7.14732	1	0	0	0	0	0	0	0	0	1	1	1	1	0	1	0	1	5	1	CHEF
chr7	55860516	55860916	chr15	22918024	22920024	1039122	1.14289	1.38036	0	0	0	0	0	0	0	0	1	1	0	1	1	0	0	0	0	2	1	CHEF
chr13	83740818	83741247	chr5	87959536	87961536	2012380	1.14198	0.788025	0	1	1	0	0	0	0	0	0	2	1	1	1	0	1	0	1	5	1	CHEF
chr7	139579497	139579897	chr10	134596031	134598031	1040653	1.14141	0.696091	1	0	0	0	0	0	0	0	0	1	0	0	1	0	0	0	1	2	1	CHEF
chr2	148040687	148041125	chr20	22558927	22560927	3025560	1.14119	1.83409	1	1	1	0	0	0	0	0	0	3	1	1	1	1	0	0	1	5	1	CHEF
chr17	8414353	8414774	chr6	166609942	166611942	2018162	1.14091	0.865823	1	1	0	0	0	0	0	0	0	2	1	0	1	0	0	0	1	3	1	CHEF
chr14	98022255	98022655	chr13	72258359	72260359	1014250	1.13845	0.966889	0	0	1	0	0	0	0	0	0	1	1	1	1	0	1	0	1	5	1	CHEF
chr5	119694847	119695324	chr12	115094047	115096047	2034204	1.13839	2.14201	0	1	1	0	0	0	0	0	0	2	0	0	1	0	0	0	0	1	1	CHEF
chr1	42713307	42713767	chr2	105487895	105489895	2000500	1.13507	1.48776	1	0	1	0	0	0	0	0	0	2	1	0	1	0	0	0	1	3	1	CHEF
chr1	36568091	36568491	chr2	97546338	97548338	1000376	1.13347	3.99168	0	0	0	0	0	1	0	0	0	1	1	0	1	1	1	0	0	4	1	CHEF
chr18	72562882	72563282	chr18	49716212	49718212	1021293	1.1297	1.43613	1	0	0	0	0	0	0	0	0	1	1	0	1	0	1	0	0	3	1	CHEF
chr9	79830820	79831279	chr6	76043501	76045501	3045214	1.12949	5.38238	1	1	1	0	0	0	0	0	0	3	1	1	1	0	1	0	1	5	1	CHEF
chr12	57534777	57535185	chr14	38052113	38054113	1009838	1.12361	1.11429	0	0	0	0	0	1	0	0	0	1	0	1	1	0	0	0	1	3	1	CHEF
chr15	74226043	74226443	chr8	143100911	143102911	1015308	1.12142	2.01436	0	1	0	0	0	0	0	0	0	1	1	0	1	0	0	0	0	2	1	CHEF
chr9	43270776	43271176	chr11	120050650	120052650	1044167	1.12102	0.995057	0	0	1	0	0	0	0	0	0	1	0	0	1	0	0	0	1	2	1	CHEF
chr10	42614003	42614454	chr6	108454311	108456311	2003590	1.1182	1.28766	0	0	1	0	0	1	0	0	0	2	0	0	1	0	0	0	1	2	1	CHEF
chr2	109578788	109579426	chr11	27817149	27819149	3024886	1.11806	0.902512	1	1	1	0	0	0	0	0	0	3	0	1	1	0	1	0	1	4	1	CHEF
chr6	117180177	117180671	chr10	44865597	44867597	2037094	1.11759	4.04052	1	1	0	0	0	0	0	0	0	2	1	1	1	0	1	0	1	5	1	CHEF
chr6	37597595	37597995	chr7	137855713	137857713	1035812	1.11721	8.4512	0	0	0	1	0	0	0	0	0	1	0	0	0	0	0	0	0	0	1	CHEF
chr9	43879922	43880322	chr11	119454296	119456296	1044190	1.11683	2.15758	0	0	1	0	0	0	0	0	0	1	1	1	0	0	0	0	1	3	1	CHEF
chr9	119571286	119571873	chr3	38681668	38683668	4046011	1.11635	1.50252	0	1	1	1	0	0	0	0	1	4	0	1	1	0	0	1	1	4	1	CHEF
chr12	118838379	118838834	chr7	20834810	20836810	2011016	1.11604	2.74378	0	1	0	0	0	0	0	0	1	2	0	1	1	0	1	0	1	4	1	CHEF
chr11	19025948	19026350	chr2	66653688	66655688	2005761	1.11599	1.00425	1	0	1	0	0	0	0	0	0	2	0	0	0	0	1	0	1	2	1	CHEF
chr19	28368216	28368616	chr9	3947430	3949430	1022256	1.11589	1.48897	0	0	1	0	0	0	0	0	0	1	0	0	1	0	1	0	1	3	1	CHEF
chr18	12268271	12268729	chr18	21198527	21200527	2020330	1.11574	1.28188	0	0	1	0	0	1	0	0	0	2	1	0	1	0	1	0	0	3	1	CHEF
chr2	138337952	138338384	chr20	11959462	11961462	2025433	1.11496	2.49314	0	1	1	0	0	0	0	0	0	2	0	0	1	0	0	0	0	1	1	CHEF
chr10	95302243	95302682	chr12	94092027	94094027	2004858	1.11489	4.03723	0	1	1	0	0	0	0	0	0	2	0	1	1	0	1	0	1	4	1	CHEF
chr17	4967153	4967570	chr6	157064261	157066261	3018081	1.11405	0.788025	1	1	1	0	0	0	0	0	0	3	0	0	0	0	0	1	0	1	1	CHEF
chr8	109012563	109013010	chr16	72755700	72757700	2042903	1.11293	2.09233	0	1	1	0	0	0	0	0	0	2	1	1	1	0	1	0	1	5	1	CHEF
chr2	159069169	159069699	chr20	37910494	37912494	3025938	1.11189	1.24101	1	0	1	0	0	0	0	0	1	3	1	1	1	0	1	0	0	4	1	CHEF
chr9	91355652	91356077	chr3	147136080	147138080	1045314	1.11116	1.20676	1	0	0	0	0	0	0	0	0	1	1	0	0	0	0	1	0	2	1	CHEF
chr13	109073416	109073823	chr5	59231818	59233818	3012789	1.1106	1.11012	1	1	1	0	0	0	0	0	0	3	1	0	0	0	0	0	0	1	1	CHEF
chr11	55684871	55685421	chr5	151386394	151388394	2006463	1.10607	0.959402	1	1	0	0	0	0	0	0	0	2	1	0	1	0	0	0	0	2	1	CHEF
chr4	11914591	11914991	chr8	95002781	95004781	1028983	1.1048	1.69203	0	0	1	0	0	0	0	0	0	1	0	0	0	1	1	0	1	3	1	CHEF
chr18	45501922	45502343	chr5	113646850	113648850	2020898	1.10335	2.15817	1	1	0	0	0	0	0	0	0	2	1	1	0	0	1	0	1	4	1	CHEF
chr14	75541044	75541444	chr13	46342376	46344376	1014061	1.10312	3.23521	1	0	0	0	0	0	0	0	0	1	1	1	1	0	1	0	1	5	1	CHEF
chr13	16032408	16032808	chr7	41722091	41724091	1011179	1.10158	1.14386	0	0	1	0	0	0	0	0	0	1	0	1	1	0	1	0	1	4	1	CHEF
chr13	84752250	84752674	chr5	87082629	87084629	2012388	1.1014	1.39856	0	1	1	0	0	0	0	0	0	2	1	1	1	0	1	0	1	5	1	CHEF
chr2	34363714	34364114	chr9	128516842	128518842	1023852	1.10098	3.01686	1	0	0	0	0	0	0	0	0	1	1	1	1	0	1	0	1	5	1	CHEF
chr7	109191219	109192158	chr11	8304025	8306025	2039928	1.10003	1.16781	0	0	1	0	0	1	0	0	0	2	0	0	1	0	0	0	1	2	1	CHEF
chr11	91196873	91197330	chr17	52349865	52351865	3007691	1.09887	1.78809	1	1	1	0	0	0	0	0	0	3	0	0	0	0	0	0	1	1	1	CHEF
chr9	71217128	71217588	chr15	58355444	58357444	2045036	1.09877	0.575871	0	1	1	0	0	0	0	0	0	2	1	1	1	0	1	0	1	5	1	CHEF
chr3	131117936	131118336	chr4	109081095	109083095	1028521	1.09842	0.968549	1	0	0	0	0	0	0	0	0	1	0	0	0	0	1	0	1	2	1	CHEF
chr11	96732679	96733129	chr17	46237070	46239070	2007911	1.09711	1.86006	1	1	0	0	0	0	0	0	0	2	1	1	1	0	1	0	1	5	1	CHEF
chr4	115079558	115079958	chr1	47673331	47675331	1030245	1.09364	1.16967	0	0	1	0	0	0	0	0	0	1	1	1	1	0	0	0	0	3	1	CHEF
chr18	68632417	68632842	chr18	54074236	54076236	3021264	1.09288	2.63339	1	1	1	0	0	0	0	0	0	3	0	0	0	0	1	0	1	2	1	CHEF
chr9	94134331	94134803	chr3	144101348	144103348	2045329	1.09132	1.12813	1	1	0	0	0	0	0	0	0	2	1	0	1	0	1	0	1	4	1	CHEF
chr10	111559681	111560134	chr12	76352636	76354636	2005012	1.09084	4.70826	0	1	1	0	0	0	0	0	0	2	1	1	0	0	1	0	1	4	1	CHEF
chr4	115979354	115979804	chr1	46913068	46915068	3030270	1.09067	1.70585	1	0	1	0	0	1	0	0	0	3	0	0	1	0	0	0	0	1	1	CHEF
chr13	83738262	83738662	chr5	87962107	87964107	1012379	1.09049	1.79274	1	0	0	0	0	0	0	0	0	1	1	0	0	0	1	0	1	3	1	CHEF
chr12	31306951	31307351	chr7	107591478	107593478	1009571	1.09012	2.17444	0	0	0	0	0	1	0	0	0	1	0	0	0	0	1	0	1	2	1	CHEF
chr13	32764531	32764931	chr6	2733534	2735534	1011402	1.08815	1.52692	1	0	0	0	0	0	0	0	0	1	0	0	0	0	1	0	1	2	1	CHEF
chr1	187983062	187983462	chr1	216912928	216914928	1002802	1.08603	2.61011	0	1	0	0	0	0	0	0	0	1	1	1	1	0	1	0	1	5	1	CHEF
chr14	25448447	25448932	chr10	80815614	80817614	2013243	1.08574	1.42614	1	0	0	0	0	0	0	0	1	2	1	0	0	0	0	0	1	2	1	CHEF
chr8	99250022	99250422	chr16	61905539	61907539	1042690	1.08484	4.45591	0	0	1	0	0	0	0	0	0	1	1	0	1	0	1	0	1	4	1	CHEF
chr7	109190705	109191105	chr11	8303177	8305177	1039927	1.08348	0.93706	0	0	1	0	0	0	0	0	0	1	0	0	1	0	0	0	1	2	1	CHEF
chr13	7269408	7269811	chr10	2616874	2618874	2011072	1.08123	1.27224	1	0	1	0	0	0	0	0	0	2	1	1	0	0	1	0	1	4	1	CHEF
chr8	16591378	16591778	chr8	3704414	3706414	1041137	1.07864	0.769556	1	0	0	0	0	0	0	0	0	1	0	0	1	0	0	0	1	2	1	CHEF
chr6	23356039	23356556	chr7	122055574	122057574	4035578	1.07582	1.17299	0	1	1	1	0	0	0	0	1	4	0	0	1	0	0	0	0	1	1	CHEF
chr18	33157687	33158087	chr5	110782522	110784522	1020554	1.07499	0.866781	0	0	0	0	0	0	0	0	1	1	0	0	1	0	0	0	1	2	1	CHEF
chr15	35300988	35301388	chr8	99961067	99963067	1014881	1.07111	1.11621	0	0	0	0	0	0	0	0	1	1	0	0	1	0	1	0	1	3	1	CHEF
chr12	53249115	53249515	chr14	33403789	33405789	1009755	1.07037	1.13202	1	0	0	0	0	0	0	0	0	1	1	0	1	0	0	0	0	2	1	CHEF
chr7	129987863	129988263	chr10	123048154	123050154	1040439	1.07025	4.42196	0	0	0	0	0	1	0	0	0	1	1	1	1	0	1	0	1	5	1	CHEF
chr9	71861291	71861691	chr15	57551357	57553357	1045052	1.07019	1.93578	0	0	1	0	0	0	0	0	0	1	1	1	1	0	1	0	0	4	1	CHEF
chr2	76126674	76127074	chr2	178662606	178664606	1024492	1.06787	0.841729	0	0	0	1	0	0	0	0	0	1	1	0	0	0	1	0	1	3	1	CHEF
chr10	98749119	98749677	chr12	90277005	90279005	4004912	1.06418	1.91112	1	1	1	0	0	0	0	0	1	4	1	1	1	0	1	0	1	5	1	CHEF
chr15	85615205	85615683	chr22	46408540	46410540	2015903	1.06318	3.2569	0	0	1	0	0	1	0	0	0	2	0	0	0	1	1	0	0	2	1	CHEF
chr14	28955238	28955638	chr3	55039294	55041294	1013319	1.06307	2.55684	1	0	0	0	0	0	0	0	0	1	1	0	0	0	1	0	0	2	1	CHEF
chr4	80864357	80864757	chr9	12717555	12719555	1029773	1.06236	1.33321	0	0	1	0	0	0	0	0	0	1	1	0	0	0	1	0	0	2	1	CHEF
chr3	119946985	119947385	chr1	96987833	96989833	1028344	1.06084	3.9937	0	1	0	0	0	0	0	0	0	1	1	1	1	0	1	0	0	4	1	CHEF
chr9	69670071	69670553	chr15	60410012	60412012	2044991	1.059	3.62913	1	0	1	0	0	0	0	0	0	2	1	0	1	0	1	0	1	4	1	CHEF
chr11	33598430	33598830	chr5	170187472	170189472	1006057	1.05848	6.96523	0	1	0	0	0	0	0	0	0	1	0	0	0	0	1	0	0	1	1	CHEF
chr16	5817129	5817529	chr16	5977871	5979871	1016624	1.05693	1.70093	0	0	0	0	0	0	0	0	1	1	1	1	1	0	1	0	1	5	1	CHEF
chr17	62247931	62248331	chr5	106403653	106405653	1019643	1.05634	2.45037	0	0	1	0	0	0	0	0	0	1	1	0	1	0	0	0	1	3	1	CHEF
chr5	20115144	20115544	chr7	78207047	78209047	1032313	1.05414	6.43898	1	0	0	0	0	0	0	0	0	1	1	1	1	0	1	0	1	5	1	CHEF
chr3	31405745	31406264	chr3	170414846	170416846	2027072	1.05121	1.40258	0	0	1	0	0	1	0	0	0	2	0	0	1	0	0	0	1	2	1	CHEF
chr7	119279379	119279779	chr16	20185783	20187783	1040162	1.0499	2.44494	0	0	0	1	0	0	0	0	0	1	1	1	1	0	1	0	1	5	1	CHEF
chr4	65252182	65252630	chr9	119047718	119049718	3029723	1.04938	1.68225	1	1	1	0	0	0	0	0	0	3	1	1	1	0	1	0	1	5	1	CHEF
chr17	30465081	30465481	chr6	38477375	38479375	1018803	1.0472	1.31632	0	0	0	0	0	0	0	0	1	1	1	0	1	0	1	0	1	4	1	CHEF
chr1	10476743	10477227	chr8	68417460	68419460	2000094	1.04531	1.95623	0	1	1	0	0	0	0	0	0	2	0	1	0	0	1	0	1	3	1	CHEF
chr1	78189430	78189881	chr2	223154848	223156848	2001065	1.04525	1.71297	0	0	1	0	0	1	0	0	0	2	0	0	1	0	1	0	1	3	1	CHEF
chr4	124359616	124360683	chr1	38835974	38837974	4030597	1.04525	4.06136	1	1	1	1	0	0	0	0	0	4	1	0	1	0	1	0	0	3	1	CHEF
chr13	88929642	88930104	chr5	83560605	83562605	2012406	1.04258	2.8141	1	0	1	0	0	0	0	0	0	2	0	0	1	0	1	0	0	2	1	CHEF
chr3	97269446	97270162	chr1	147038850	147040850	2027983	1.04109	4.00731	1	0	0	0	0	0	0	0	1	2	1	1	1	0	1	0	1	5	1	CHEF
chr11	84697593	84698005	chr17	35087265	35089265	2007464	1.0409	1.68734	1	1	0	0	0	0	0	0	0	2	1	0	1	0	0	0	0	2	1	CHEF
chr10	90863837	90864266	chr12	99256125	99258125	2004774	1.03723	1.3261	0	0	1	1	0	0	0	0	0	2	1	0	1	0	1	0	0	3	1	CHEF
chr12	86220652	86221127	chr14	76604285	76606285	2010371	1.03481	1.48387	0	0	1	0	0	1	0	0	0	2	1	0	1	0	1	0	1	4	1	CHEF
chr10	42194858	42195258	chr6	108987494	108989494	1003571	1.02874	2.44664	0	0	0	0	0	0	0	0	1	1	1	1	1	0	0	0	1	4	1	CHEF
chr3	129199600	129200288	chr4	111557142	111559142	2028477	1.02797	1.79919	0	0	1	0	0	1	0	0	0	2	0	0	1	0	1	0	1	3	1	CHEF
chr15	84621987	84622483	chr22	45003702	45005702	3015855	1.02634	1.37753	1	1	1	0	0	0	0	0	0	3	1	0	0	0	0	0	0	1	1	CHEF
chr11	119048149	119048549	chr17	77777484	77779484	1009040	1.02544	1.20173	1	0	0	0	0	0	0	0	0	1	1	0	0	0	0	0	1	2	1	CHEF
chr14	67242096	67242499	chr8	25894000	25896000	2013939	1.02518	1.00425	1	1	0	0	0	0	0	0	0	2	1	1	1	0	1	0	0	4	1	CHEF
chr14	54754567	54754967	chr14	23629352	23631352	1013650	1.02375	2.3559	0	0	0	0	0	0	0	0	1	1	1	0	1	1	1	0	0	4	1	CHEF
chr9	34382170	34382619	chr11	126978944	126980944	3044004	1.02327	2.51356	1	1	1	0	0	0	0	0	0	3	1	0	1	0	0	0	0	2	1	CHEF
chr2	51038688	51039159	chr2	151232163	151234163	3024046	1.02327	1.38773	1	1	1	0	0	0	0	0	0	3	0	0	0	0	0	0	1	1	1	CHEF
chr2	75246281	75246681	chr2	177609795	177611795	1024460	1.02205	4.22815	1	0	0	0	0	0	0	0	0	1	1	0	1	0	1	0	0	3	1	CHEF
chr7	49337677	49338077	chr11	19829645	19831645	1039067	1.02067	1.3676	0	0	1	0	0	0	0	0	0	1	0	0	1	0	0	0	1	2	1	CHEF
chr6	80545039	80545439	chr2	77244458	77246458	1036375	1.01875	1.24955	1	0	0	0	0	0	0	0	0	1	0	1	1	0	1	0	1	4	1	CHEF
chr13	98358527	98358936	chr5	72739030	72741030	2012614	1.01795	0.847955	1	1	0	0	0	0	0	0	0	2	1	1	1	0	1	0	1	5	1	CHEF
chr6	52243088	52244070	chr7	27221641	27223641	2036079	1.01508	1.16188	0	0	0	1	0	0	0	0	1	2	0	0	1	1	0	0	1	3	1	CHEF
chr9	37177154	37177554	chr11	125010724	125012724	1044051	1.01021	1.20861	1	0	0	0	0	0	0	0	0	1	1	0	0	0	1	0	0	2	1	CHEF
chr18	74169528	74169928	chr18	47967062	47969062	1021313	1.00809	1.09958	0	0	1	0	0	0	0	0	0	1	0	1	1	0	0	0	1	3	1	CHEF
chr11	119047459	119047859	chr17	77776728	77778728	1009039	1.00755	1.46503	0	0	0	0	0	0	0	0	1	1	1	0	0	0	0	0	1	2	1	CHEF
chr5	147315001	147315482	chr13	28551361	28553361	2035277	1.00754	1.06537	0	0	1	0	0	1	0	0	0	2	0	0	1	0	0	0	1	2	1	CHEF
chr6	22922870	22923274	chr7	121563508	121565508	2035574	1.00523	1.52058	1	1	0	0	0	0	0	0	0	2	1	1	1	0	1	0	1	5	1	CHEF
chr9	92930452	92930893	chr3	145436168	145438168	2045327	1.00504	0.894408	1	1	0	0	0	0	0	0	0	2	1	1	1	0	1	0	0	4	1	CHEF
chr18	54685834	54686234	chr5	123773923	123775923	1020991	1.00188	5.36203	1	0	0	0	0	0	0	0	0	1	1	0	1	0	0	0	0	2	1	CHEF
chr19	6569553	6569953	chr11	64333077	64335077	1021854	1.00038	3.24051	1	0	0	0	0	0	0	0	0	1	1	1	1	0	0	0	1	4	1	CHEF
chr6	143941279	143941679	chr12	23792876	23794876	1037664	0.991296	3.71148	0	1	0	0	0	0	0	0	0	1	1	1	1	0	1	0	1	5	1	CHEF
chr8	48299327	48299727	chr4	183650537	183652537	1041647	0.989901	1.12779	0	0	0	0	0	1	0	0	0	1	0	0	1	0	0	0	1	2	1	CHEF
chr13	94545661	94546158	chr5	77312207	77314207	3012474	0.986998	0.676421	1	1	1	0	0	0	0	0	0	3	1	1	1	0	1	0	1	5	1	CHEF
chr7	49678104	49678928	chr11	20268393	20270393	4039084	0.98681	1.09762	1	1	1	0	0	0	0	0	1	4	1	1	1	0	1	0	0	4	1	CHEF
chr12	48290164	48290571	chr14	28309175	28311175	1009704	0.984675	1.68197	0	0	1	0	0	0	0	0	0	1	0	0	1	0	1	0	1	3	1	CHEF
chr13	116298793	116299193	chr5	50688878	50690878	1012932	0.982709	0.894408	0	0	0	0	0	0	0	0	1	1	1	1	1	0	1	0	1	5	1	CHEF
chr1	155306781	155307181	chr1	180805528	180807528	1002169	0.981826	1.34724	0	0	1	0	0	0	0	0	0	1	0	0	1	0	1	0	1	3	1	CHEF
chr7	137461401	137461801	chr10	131966945	131968945	1040615	0.980736	0.985348	0	0	1	0	0	0	0	0	0	1	0	0	1	0	0	0	1	2	1	CHEF
chr2	37938169	37938569	chr9	126322491	126324491	1023948	0.980716	1.49915	0	0	1	0	0	0	0	0	0	1	0	1	1	0	0	0	0	2	1	CHEF
chr14	22058683	22059121	chr10	77234422	77236422	3013202	0.976079	1.74526	1	1	1	0	0	0	0	0	0	3	1	1	1	0	1	0	1	5	1	CHEF
chr17	63183457	63183857	chr5	107311048	107313048	1019648	0.973878	1.99152	0	0	0	0	1	0	0	0	0	1	1	0	1	0	1	0	0	3	1	CHEF
chr7	114004195	114004607	chr11	14250661	14252661	3040057	0.973743	2.14418	1	1	1	0	0	0	0	0	0	3	1	0	1	0	0	0	0	2	1	CHEF
chr9	87894140	87894567	chr6	85619784	85621784	2045279	0.970444	1.20439	1	1	0	0	0	0	0	0	0	2	1	0	1	0	0	0	1	3	1	CHEF
chr15	94518055	94518492	chr12	44116059	44118059	1016087	0.969748	1.52709	0	0	1	0	0	0	0	0	0	1	0	0	1	0	0	0	1	2	1	CHEF
chr9	69670617	69671017	chr15	60409505	60411505	1044992	0.969321	3.18693	0	0	1	0	0	0	0	0	0	1	1	0	1	0	1	0	1	4	1	CHEF
chr4	120252433	120252836	chr1	41860122	41862122	3030478	0.961861	1.53623	1	1	0	0	0	0	0	0	1	3	1	0	0	1	0	0	0	2	1	CHEF
chr2	73276186	73276646	chr2	175203081	175205081	3024407	0.960629	0.799485	1	1	1	0	0	0	0	0	0	3	0	0	1	0	1	0	1	3	1	CHEF
chr8	90520179	90520806	chr16	52774594	52776594	3042505	0.960333	2.66127	1	1	1	0	0	0	0	0	0	3	1	0	0	0	1	0	0	2	1	CHEF
chr14	122871808	122872208	chr13	101161653	101163653	1014556	0.960122	6.75598	0	0	1	0	0	0	0	0	0	1	0	1	1	0	1	0	1	4	1	CHEF
chr11	95246975	95247375	chr17	47941863	47943863	1007790	0.959703	2.48251	0	0	0	0	0	1	0	0	0	1	0	1	1	1	0	0	0	3	1	CHEF
chr3	8684750	8685579	chr8	80695037	80697037	3026764	0.958397	1.29522	0	1	1	1	0	0	0	0	0	3	1	0	0	0	0	1	0	2	1	CHEF
chr3	31968747	31969147	chr3	178318600	178320600	1027074	0.958176	1.00892	0	0	1	0	0	0	0	0	0	1	0	0	1	0	1	0	1	3	1	CHEF
chr9	41636936	41637336	chr11	121910497	121912497	1044117	0.957026	1.81998	0	0	1	0	0	0	0	0	0	1	0	1	1	0	1	0	1	4	1	CHEF
chr8	26255018	26255418	chr8	36806681	36808681	1041310	0.956952	1.09145	0	1	0	0	0	0	0	0	0	1	0	0	1	0	0	0	1	2	1	CHEF
chr19	45675938	45676338	chr10	103468890	103470890	1022691	0.955693	0.853734	0	0	0	0	0	1	0	0	0	1	0	0	1	0	0	0	1	2	1	CHEF
chr5	37893558	37893958	chr4	4764390	4766390	1032808	0.953357	1.74623	0	0	1	0	0	0	0	0	0	1	0	0	0	0	1	0	1	2	1	CHEF
chrX	52109827	52110227	chrX	132493025	132495025	1046431	0.952636	1.67445	0	0	1	0	0	0	0	0	0	1	1	0	1	0	0	0	1	3	1	CHEF
chr2	85252243	85252643	chr11	56891774	56893774	1024606	0.951784	1.69619	0	1	0	0	0	0	0	0	0	1	0	0	1	0	0	0	1	2	1	CHEF
chr10	52704474	52705055	chr6	118240288	118242288	3003716	0.951678	1.20584	1	0	1	0	0	1	0	0	0	3	1	0	1	0	1	0	1	4	1	CHEF
chr10	17490920	17491320	chr6	139947535	139949535	1003133	0.951569	2.35891	0	1	0	0	0	0	0	0	0	1	1	0	1	0	0	0	1	3	1	CHEF
chr1	190131361	190131761	chr1	214199579	214201579	1002834	0.950249	1.78449	1	0	0	0	0	0	0	0	0	1	1	0	1	0	0	0	1	3	1	CHEF
chr4	40106160	40106602	chr9	32344725	32346725	2029194	0.9497	4.93282	0	1	1	0	0	0	0	0	0	2	1	0	1	1	1	0	0	4	1	CHEF
chr7	111283712	111284112	chr11	11092081	11094081	1039990	0.949451	2.09517	0	0	0	1	0	0	0	0	0	1	1	0	0	0	0	0	1	2	1	CHEF
chr16	51589987	51590387	chr3	106014008	106016008	1017593	0.948212	0.991155	0	0	1	0	0	0	0	0	0	1	0	0	1	0	0	0	1	2	1	CHEF
chr13	31921639	31922039	chr6	1729763	1731763	1011399	0.946168	1.85154	0	0	0	1	0	0	0	0	0	1	0	0	1	0	0	0	1	2	1	CHEF
chr3	127639861	127640261	chr4	113431150	113433150	1028467	0.945419	0.912676	0	0	0	0	0	1	0	0	0	1	0	1	1	0	0	0	1	3	1	CHEF
chr8	97396888	97397365	chr16	60239668	60241668	3042686	0.944136	1.68375	1	1	1	0	0	0	0	0	0	3	1	0	1	0	0	0	1	3	1	CHEF
chr4	23787432	23787832	chr6	98297885	98299885	1029078	0.939706	1.61166	0	1	0	0	0	0	0	0	0	1	0	0	1	0	1	0	0	2	1	CHEF
chr18	54551981	54552381	chr5	123598927	123600927	1020990	0.93948	2.98624	0	0	1	0	0	0	0	0	0	1	0	0	1	0	1	0	1	3	1	CHEF
chr18	47577004	47577404	chr5	116113038	116115038	1020947	0.93843	3.8965	0	0	1	0	0	0	0	0	0	1	1	0	0	0	1	0	0	2	1	CHEF
chr1	193466255	193466655	chr1	209645568	209647568	1002927	0.938204	2.01223	0	0	1	0	0	0	0	0	0	1	1	0	1	0	0	0	1	3	1	CHEF
chr1	152414613	152415013	chr1	183993466	183995466	1002084	0.93653	0.99152	0	0	1	0	0	0	0	0	0	1	1	1	1	0	1	0	1	5	1	CHEF
chr4	98535512	98535912	chr1	62379506	62381506	1029951	0.934132	1.29522	0	0	1	0	0	0	0	0	0	1	0	0	1	0	0	0	1	2	1	CHEF
chr1	78167918	78168368	chr2	223133106	223135106	3001064	0.933884	1.097	1	1	1	0	0	0	0	0	0	3	0	0	1	0	0	0	1	2	1	CHEF
chr10	120417842	120418242	chr12	66288401	66290401	1005170	0.933834	8.62544	0	0	0	0	0	0	0	0	1	1	0	1	0	0	1	0	0	2	1	CHEF
chr10	84411784	84412184	chr12	106501982	106503982	1004624	0.933746	4.54176	0	0	0	1	0	0	0	0	0	1	0	0	1	0	1	0	1	3	1	CHEF
chr2	146218394	146218802	chr20	20344102	20346102	2025520	0.932621	1.84242	1	0	0	0	0	1	0	0	0	2	1	0	0	1	0	0	0	2	1	CHEF
chr7	143289128	143289528	chr11	2713810	2715810	1040810	0.929115	5.15699	1	0	0	0	0	0	0	0	0	1	1	1	1	0	1	0	1	5	1	CHEF
chr1	62927440	62927840	chr2	206746997	206748997	1000749	0.92776	1.30225	0	1	0	0	0	0	0	0	0	1	1	1	0	0	0	0	1	3	1	CHEF
chr8	35143249	35143649	chr8	9243396	9245396	1041455	0.927588	1.01152	1	0	0	0	0	0	0	0	0	1	1	0	1	0	0	0	1	3	1	CHEF
chr12	26542424	26542859	chr2	6904300	6906300	2009512	0.922177	2.81015	1	1	0	0	0	0	0	0	0	2	1	0	1	0	1	0	1	4	1	CHEF
chr2	45024453	45024927	chr2	145188100	145190100	2024008	0.918241	2.12498	1	0	1	0	0	0	0	0	0	2	0	0	0	0	1	0	1	2	1	CHEF
chr18	66022630	66023030	chr18	57053266	57055266	1021205	0.917582	1.31764	0	0	1	0	0	0	0	0	0	1	0	1	1	0	1	0	1	4	1	CHEF
chr4	129977291	129977691	chr1	32236650	32238650	1030895	0.913315	1.25353	0	0	0	0	0	1	0	0	0	1	1	0	0	0	0	0	1	2	1	CHEF
chr9	118255446	118255998	chr3	28118512	28120512	3045954	0.910085	1.14714	1	1	1	0	0	0	0	0	0	3	0	0	1	0	1	0	0	2	1	CHEF
chr19	41164281	41164721	chr10	98209757	98211757	2022490	0.907016	4.99412	1	1	0	0	0	0	0	0	0	2	1	1	1	0	1	0	1	5	1	CHEF
chr17	31670097	31670497	chr21	44578611	44580611	1018859	0.906082	1.97239	0	0	1	0	0	0	0	0	0	1	0	1	1	0	1	0	0	3	1	CHEF
chr16	73230585	73230985	chr3	78395474	78397474	1017713	0.896456	3.88952	0	1	0	0	0	0	0	0	0	1	1	0	1	0	1	0	0	3	1	CHEF
chr7	137317288	137317709	chr10	131764647	131766647	3040607	0.892535	0.887979	1	1	1	0	0	0	0	0	0	3	1	0	0	0	0	0	0	1	1	CHEF
chr14	22004915	22005353	chr10	77176548	77178548	4013200	0.890525	0.641599	1	1	1	1	0	0	0	0	0	4	1	1	1	0	1	0	1	5	1	CHEF
chr6	53234004	53234404	chr7	28397493	28399493	1036106	0.889623	3.07897	1	0	0	0	0	0	0	0	0	1	0	0	1	0	0	0	1	2	1	CHEF
chr8	17934679	17935109	chr8	5617093	5619093	3041142	0.888942	0.908472	1	1	1	0	0	0	0	0	0	3	0	0	1	0	0	0	0	1	1	CHEF
chr14	56393217	56393617	chr13	25289773	25291773	1013712	0.886509	1.88645	0	0	0	0	0	0	0	0	1	1	1	0	1	0	1	0	0	3	1	CHEF
chr8	108699388	108699788	chr16	73096166	73098166	1042885	0.884757	1.38036	0	0	0	1	0	0	0	0	0	1	0	0	0	0	1	0	1	2	1	CHEF
chr15	55440943	55441343	chr8	121277907	121279907	1015092	0.884407	0.785694	0	0	0	0	0	0	0	0	1	1	0	0	1	0	1	0	1	3	1	CHEF
chr1	75499909	75500309	chr2	220429146	220431146	1001012	0.882101	4.45602	0	0	0	1	0	0	0	0	0	1	1	1	1	0	1	0	1	5	1	CHEF
chr2	51735347	51735747	chr2	151937670	151939670	1024056	0.881464	2.47796	0	0	0	0	0	0	0	0	1	1	0	0	1	0	1	0	1	3	1	CHEF
chr9	43389458	43389859	chr11	119927950	119929950	2044169	0.874115	3.78938	1	1	0	0	0	0	0	0	0	2	1	0	0	0	0	0	0	1	1	CHEF
chr4	114902085	114902494	chr1	47909531	47911531	1030232	0.870075	1.24319	0	0	0	0	0	1	0	0	0	1	0	0	1	0	0	0	1	2	1	CHEF
chr7	79543677	79544129	chr15	89950030	89952030	2039411	0.868871	1.22216	0	0	1	0	0	1	0	0	0	2	0	0	1	0	1	0	0	2	1	CHEF
chr9	120715008	120715408	chr3	40888496	40890496	1046053	0.866535	2.20936	0	0	0	0	0	0	0	0	1	1	1	0	0	0	1	0	0	2	1	CHEF
chr2	26170819	26171271	chr9	139042168	139044168	2023433	0.86387	1.99262	0	0	0	1	0	0	0	0	1	2	1	0	1	0	0	0	1	3	1	CHEF
chr14	121062634	121063034	chr13	98824371	98826371	1014480	0.858478	3.02446	0	0	0	0	0	1	0	0	0	1	0	0	0	0	1	0	1	2	1	CHEF
chr7	70329371	70329771	chr15	96904888	96906888	1039280	0.855733	0.938847	1	0	0	0	0	0	0	0	0	1	0	0	1	0	0	0	1	2	1	CHEF
chr18	37851949	37852349	chr5	140903342	140905342	1020752	0.854549	1.54528	0	0	0	0	0	0	0	0	1	1	1	0	0	0	1	0	1	3	1	CHEF
chr1	70902221	70902621	chr2	215457178	215459178	1000834	0.853489	0.636269	0	0	0	0	0	0	0	0	1	1	1	0	1	0	1	0	1	4	1	CHEF
chr4	23612971	23613371	chr6	98483420	98485420	1029075	0.852906	3.67569	1	0	0	0	0	0	0	0	0	1	1	1	1	0	1	0	0	4	1	CHEF
chr11	36220377	36220793	chr5	167474153	167476153	2006113	0.85287	1.71641	0	1	1	0	0	0	0	0	0	2	0	1	1	0	0	0	1	3	1	CHEF
chr10	17705459	17705859	chr6	139716355	139718355	1003139	0.846537	1.07446	0	0	1	0	0	0	0	0	0	1	1	1	1	1	1	0	1	6	1	CHEF
chr1	39700487	39700956	chr2	102049934	102051934	3000464	0.842224	1.30965	1	1	1	0	0	0	0	0	0	3	0	0	0	1	0	0	1	2	1	CHEF
chr8	115199157	115199606	chr16	79086669	79088669	3043056	0.839591	2.15434	1	1	1	0	0	0	0	0	0	3	1	0	1	0	0	0	0	2	1	CHEF
chr7	37625787	37626202	chr19	30863682	30865682	3038733	0.83841	1.62053	1	1	1	0	0	0	0	0	0	3	1	1	1	0	1	0	0	4	1	CHEF
chr18	64342684	64343128	chr18	55104318	55106318	2021143	0.837765	1.19727	0	1	0	0	0	1	0	0	0	2	0	1	0	0	0	0	1	2	1	CHEF
chr4	140069447	140069847	chr1	18658583	18660583	1031541	0.834827	1.13413	0	0	0	0	0	0	0	0	1	1	1	0	1	0	0	0	0	2	1	CHEF
chr1	19244558	19244958	chr6	50820328	50822328	1000203	0.83396	0.898131	1	0	0	0	0	0	0	0	0	1	0	0	1	0	0	0	1	2	1	CHEF
chr5	28158269	28158669	chr7	155241540	155243540	1032508	0.829326	1.10239	0	0	1	0	0	0	0	0	0	1	0	0	1	0	0	0	1	2	1	CHEF
chr9	119023821	119024262	chr3	38002629	38004629	2045986	0.828391	2.20524	0	0	0	0	1	1	0	0	0	2	0	0	1	0	1	0	1	3	1	CHEF
chr8	111445718	111446118	chr16	74902334	74904334	1042977	0.828026	2.43065	0	0	1	0	0	0	0	0	0	1	0	0	1	0	0	0	1	2	1	CHEF
chr1	192750203	192750603	chr1	210531291	210533291	1002903	0.8274	1.45427	0	0	1	0	0	0	0	0	0	1	0	0	1	0	0	0	1	2	1	CHEF
chr19	55618767	55619452	chr10	114568305	114570305	2022912	0.826827	1.92615	0	0	0	1	0	0	0	0	1	2	0	0	0	1	1	0	1	3	1	CHEF
chr4	149988825	149989233	chr1	9312184	9314184	2031914	0.82648	2.68292	0	0	1	0	0	1	0	0	0	2	0	1	1	0	1	0	1	4	1	CHEF
chr17	5247751	5248151	chr6	157410349	157412349	1018090	0.826027	2.2288	0	0	0	0	0	1	0	0	0	1	0	1	1	0	1	0	1	4	1	CHEF
chr13	94803467	94803867	chr5	77042407	77044407	1012488	0.824061	1.07832	0	0	1	0	0	0	0	0	0	1	0	0	1	0	0	0	1	2	1	CHEF
chr18	60579232	60579632	chr5	150050475	150052475	1021054	0.81983	5.9439	0	0	1	0	0	0	0	0	0	1	0	0	1	0	0	0	0	1	1	CHEF
chr1	19107118	19107518	chr6	50684844	50686844	1000198	0.816873	1.24198	0	1	0	0	0	0	0	0	0	1	1	0	1	0	0	0	1	3	1	CHEF
chr17	85624879	85625336	chr2	45172070	45174070	3020065	0.816547	1.50252	1	1	1	0	0	0	0	0	0	3	1	0	1	0	1	0	1	4	1	CHEF
chr8	95309481	95309881	chr22	32043218	32045218	1042641	0.812144	1.92979	0	0	0	0	0	0	0	0	1	1	1	0	1	0	1	0	0	3	1	CHEF
chr14	122324118	122324518	chr13	100449189	100451189	1014531	0.811548	3.5743	0	0	1	0	0	0	0	0	0	1	1	1	1	0	1	0	1	5	1	CHEF
chr6	93005508	93005908	chr3	64733501	64735501	1036723	0.807643	2.21259	0	0	1	0	0	0	0	0	0	1	1	0	1	0	1	0	1	4	1	CHEF
chr2	18686801	18687260	chr10	22620246	22622246	2023261	0.80601	0.89949	1	0	1	0	0	0	0	0	0	2	0	0	1	0	0	0	1	2	1	CHEF
chr13	60170868	60171311	chr9	89554893	89556893	2012118	0.804268	1.16162	1	1	0	0	0	0	0	0	0	2	1	1	1	0	1	0	1	5	1	CHEF
chr8	84776579	84776979	chr19	13130351	13132351	1042330	0.799738	1.46399	0	0	0	1	0	0	0	0	0	1	0	0	1	0	0	0	1	2	1	CHEF
chr14	77792935	77793378	chr13	43713991	43715991	2014134	0.797068	2.2469	1	1	0	0	0	0	0	0	0	2	1	1	0	0	0	0	0	2	1	CHEF
chr4	44970762	44971162	chr9	37414317	37416317	1029353	0.793665	2.42471	0	0	0	1	0	0	0	0	0	1	0	0	1	0	1	0	1	3	1	CHEF
chr4	103838402	103838826	chr1	58471579	58473579	2030041	0.784323	4.15015	1	1	0	0	0	0	0	0	0	2	1	1	1	0	1	0	0	4	1	CHEF
chr4	104214682	104215082	chr1	58065348	58067348	1030044	0.781882	3.29124	1	0	0	0	0	0	0	0	0	1	1	1	1	0	1	0	1	5	1	CHEF
chr6	83421722	83422240	chr2	74252884	74254884	4036440	0.780056	5.47436	1	1	1	1	0	0	0	0	0	4	1	0	1	0	0	0	1	3	1	CHEF
chr8	112268875	112269349	chr16	76016849	76018849	2043021	0.779261	0.968549	0	1	1	0	0	0	0	0	0	2	0	0	1	0	1	0	1	3	1	CHEF
chr1	118776482	118776882	chr2	121832051	121834051	1001517	0.777871	1.74571	1	0	0	0	0	0	0	0	0	1	1	1	1	0	1	0	1	5	1	CHEF
chr17	45251294	45251694	chr6	44622670	44624670	1019205	0.776589	2.03478	0	0	1	0	0	0	0	0	0	1	1	0	1	0	0	0	0	2	1	CHEF
chr6	6859501	6859901	chr7	96630383	96632383	1035476	0.771013	1.42398	1	0	0	0	0	0	0	0	0	1	1	1	1	1	1	0	0	5	1	CHEF
chr8	14957833	14958233	chr8	1845036	1847036	1041120	0.766046	2.30341	0	0	0	1	0	0	0	0	0	1	1	0	0	0	1	0	1	3	1	CHEF
chr1	165046543	165046943	chr1	168396705	168398705	1002321	0.765749	1.5765	0	0	1	0	0	0	0	0	0	1	1	0	0	0	1	0	0	2	1	CHEF
chr2	130302996	130303396	chr20	2681726	2683726	1025291	0.762251	1.46536	0	0	1	0	0	0	0	0	0	1	1	0	1	0	0	0	1	3	1	CHEF
chr17	7812518	7812918	chr1	214655702	214657702	1018151	0.754179	1.60131	0	0	0	0	0	1	0	0	0	1	1	0	1	0	0	0	1	3	1	CHEF
chr6	121473004	121473497	chr12	175367	177367	2037219	0.74127	1.08225	0	0	1	0	0	1	0	0	0	2	0	0	1	0	0	1	0	2	1	CHEF
chr2	84392673	84393073	chr2	188272870	188274870	1024570	0.73825	2.85275	0	0	1	0	0	0	0	0	0	1	1	1	1	0	1	0	1	5	1	CHEF
chr10	123678451	123678851	chr12	62173962	62175962	1005258	0.726996	2.45702	0	0	1	0	0	0	0	0	0	1	0	0	1	0	1	0	0	2	1	CHEF
chr14	49155509	49155950	chr14	57849058	57851058	2013562	0.725504	1.11516	1	0	1	0	0	0	0	0	0	2	1	0	1	0	0	0	1	3	1	CHEF
chr11	78807618	78808042	chr17	26241928	26243928	1007295	0.723737	0.865686	0	0	1	0	0	0	0	0	0	1	1	1	1	0	1	0	1	5	1	CHEF
chr6	95013143	95013597	chr3	66935113	66937113	2036775	0.715744	0.988337	1	0	1	0	0	0	0	0	0	2	0	0	1	0	0	0	1	2	1	CHEF
chr4	116293201	116293601	chr1	46509358	46511358	1030287	0.714926	1.21084	0	0	0	0	0	1	0	0	0	1	1	1	1	0	0	0	1	4	1	CHEF
chr2	35240185	35240585	chr9	124015189	124017189	1023887	0.695138	1.06775	0	0	0	1	0	0	0	0	0	1	1	1	0	0	1	0	1	4	1	CHEF
chr9	56727710	56728110	chr15	78030449	78032449	1044533	0.69501	2.97872	0	0	0	0	0	1	0	0	0	1	0	1	1	0	0	0	1	3	1	CHEF
chr2	68408567	68408967	chr2	169036162	169038162	1024247	0.690506	2.46747	0	0	0	1	0	0	0	0	0	1	0	0	1	0	1	0	0	2	1	CHEF
chr3	98941182	98941636	chr1	119868928	119870928	1028011	0.689877	2.12819	0	0	0	0	0	1	0	0	0	1	0	0	0	0	1	0	1	2	1	CHEF
chr9	91386750	91387332	chr3	147105128	147107128	1045319	0.68092	1.08391	0	0	1	0	0	0	0	0	0	1	0	0	1	0	0	0	1	2	1	CHEF
chr2	174092302	174092702	chr20	57243432	57245432	1026553	0.680244	7.47091	0	0	0	0	0	1	0	0	0	1	1	1	1	0	1	0	1	5	1	CHEF
chr3	65296997	65297397	chr3	156173768	156175768	1027409	0.65071	3.24528	0	0	1	0	0	0	0	0	0	1	0	0	1	0	1	0	0	2	1	CHEF
chr6	34085005	34085405	chr7	133874234	133876234	1035759	0.639721	1.31055	0	0	0	1	0	0	0	0	0	1	0	0	0	0	1	0	1	2	1	CHEF
chr17	83268307	83268707	chr2	42317983	42319983	1019969	0.637943	0.849115	0	0	0	0	0	0	0	0	1	1	1	1	0	0	1	0	1	4	1	CHEF
chr5	120424005	120424405	chr12	113917072	113919072	1034226	0.61275	1.33809	0	1	0	0	0	0	0	0	0	1	0	0	0	0	1	0	1	2	1	CHEF
chr9	58060633	58061033	chr15	74583260	74585260	1044600	0.60866	1.10986	0	0	1	0	0	0	0	0	0	1	1	0	1	0	1	0	1	4	1	CHEF
chr9	47070612	47071012	chr11	115844434	115846434	1044312	0.589965	1.42315	0	0	0	1	0	0	0	0	0	1	0	0	1	0	0	0	1	2	1	CHEF
chr6	113852330	113852730	chr3	10500892	10502892	1037008	0.458967	0.894777	1	0	0	0	0	0	0	0	0	1	1	1	1	0	0	1	0	4	1	CHEF
chr3	95651299	95651745	chr1	150584987	150586987	2027899	14.446	1.62194	0	0	0	1	0	0	0	0	1	2	0	0	0	0	0	0	0	0	2	CMEF
chr3	68493764	68494680	chr3	159480868	159482868	2027457	14.2635	4.70744	0	0	1	0	0	1	0	0	0	2	0	0	0	0	0	0	0	0	2	CMEF
chr4	119072803	119073216	chr1	43472299	43474299	1030429	14.1017	5.42983	0	0	0	0	0	1	0	0	0	1	0	0	0	0	0	0	0	0	2	CMEF
chr17	27038294	27038694	chr6	33557234	33559234	1018569	13.7536	2.67799	0	0	1	0	0	0	0	0	0	1	0	0	0	0	0	0	0	0	2	CMEF
chr3	68492464	68493505	chr3	159479559	159481559	3027456	13.747	3.6527	0	0	0	1	1	0	0	0	1	3	0	0	0	0	0	1	0	1	2	CMEF
chr11	19924972	19925799	chr2	65657627	65659627	3005778	13.7441	3.87938	0	0	1	1	0	1	0	0	0	3	0	0	0	0	0	0	0	0	2	CMEF
chr10	122985296	122985712	chr12	62996714	62998714	1005249	13.7064	4.73801	0	0	0	0	0	1	0	0	0	1	0	0	0	1	0	0	0	1	2	CMEF
chr4	141283542	141283942	chr1	16501610	16503610	1031614	13.5557	1.86739	0	0	0	1	0	0	0	0	0	1	0	0	0	0	0	0	0	0	2	CMEF
chrX	103980020	103980420	chrX	73832409	73834409	1046767	13.4188	4.43451	0	0	0	0	0	0	0	0	1	1	0	0	0	0	0	0	0	0	2	CMEF
chrX	151803101	151803632	chrX	53710075	53712075	2046930	13.3745	3.30351	0	0	1	0	0	1	0	0	0	2	0	0	0	0	0	1	0	1	2	CMEF
chr12	86503366	86503766	chr14	76944483	76946483	1010390	13.1857	1.24943	0	0	0	1	0	0	0	0	0	1	0	0	0	0	0	0	0	0	2	CMEF
chr1	86472152	86472553	chr2	232506680	232508680	1001180	13.1467	1.30213	0	0	0	0	0	1	0	0	0	1	0	0	0	0	0	0	0	0	2	CMEF
chr19	23141543	23141943	chr9	73027297	73029297	1022151	13.0815	1.32622	0	0	0	0	0	1	0	0	0	1	0	0	0	1	0	0	0	1	2	CMEF
chr7	138846108	138846945	chr3	38091925	38093925	2040626	12.8455	1.07201	0	0	1	0	0	1	0	0	0	2	0	0	0	0	0	0	0	0	2	CMEF
chr8	88949880	88950371	chr16	51069254	51071254	2042470	12.6083	1.22929	0	0	1	0	0	1	0	0	0	2	0	0	0	0	0	0	0	0	2	CMEF
chr3	95650528	95650928	chr1	150585221	150587221	1027898	12.44	1.46748	0	0	0	1	0	0	0	0	0	1	0	0	0	0	0	0	0	0	2	CMEF
chr7	27308737	27309237	chr19	41128853	41130853	2038348	12.4168	1.31593	1	0	0	0	0	1	0	0	0	2	0	0	0	0	0	0	0	0	2	CMEF
chr17	45572246	45572646	chr6	44214769	44216769	1019228	12.4133	4.78907	0	0	0	0	0	0	0	0	1	1	0	0	0	0	0	0	0	0	2	CMEF
chr18	33889231	33889631	chr5	111611895	111613895	1020563	12.359	0.746739	0	0	0	0	0	1	0	0	0	1	0	0	0	0	0	0	0	0	2	CMEF
chr19	24223716	24224116	chr9	71736901	71738901	1022184	12.3569	2.92191	0	0	0	0	0	0	0	0	1	1	0	0	1	0	0	0	0	1	2	CMEF
chr4	134119457	134119857	chr1	26615621	26617621	1031169	12.3284	2.41482	0	0	0	0	0	0	0	0	1	1	0	0	0	0	0	0	0	0	2	CMEF
chr15	77336342	77336790	chr22	36461068	36463068	3015491	12.3161	2.26534	0	0	1	0	1	1	0	0	0	3	0	0	0	0	0	0	0	0	2	CMEF
chr4	133659772	133660172	chr1	27125860	27127860	1031117	12.2687	1.44535	0	0	0	0	1	0	0	0	0	1	0	0	0	0	0	0	0	0	2	CMEF
chr7	16614936	16615349	chr19	47362836	47364836	2038027	12.258	4.54253	0	0	1	0	0	1	0	0	0	2	0	0	0	0	0	1	0	1	2	CMEF
chr7	63937451	63938069	chr15	31619221	31621221	3039176	12.2469	4.63102	0	0	1	0	1	1	0	0	0	3	0	0	0	0	0	0	0	0	2	CMEF
chr7	27310444	27311432	chr19	41127115	41129115	3038349	12.1933	1.06775	0	0	1	0	0	1	0	0	1	3	0	0	0	0	0	0	0	0	2	CMEF
chrX	52744193	52744766	chrX	133305388	133307388	2046443	12.1909	4.78429	0	0	1	0	0	1	0	0	0	2	0	0	0	0	0	0	0	0	2	CMEF
chr1	119053231	119053920	chr2	121492604	121494604	2001527	12.1261	5.23556	0	0	1	0	0	1	0	0	0	2	0	0	0	0	0	0	0	0	2	CMEF
chr19	7264969	7265369	chr11	63686769	63688769	1021898	12.0793	5.33109	0	0	0	1	0	0	0	0	0	1	0	0	0	0	0	0	0	0	2	CMEF
chr6	100287513	100288266	chr3	72495785	72497785	3036862	12.0777	3.6744	0	0	1	0	1	1	0	0	0	3	0	0	0	1	0	0	0	1	2	CMEF
chrX	13346936	13347889	chrX	41242174	41244174	2046280	12.0689	2.45392	1	0	1	0	0	0	0	0	0	2	0	0	0	0	0	0	0	0	2	CMEF
chr8	85037899	85038541	chr19	12830991	12832991	2042366	12.0588	3.21276	0	0	1	0	0	1	0	0	0	2	0	0	0	0	0	0	0	0	2	CMEF
chr4	119073570	119074063	chr1	43471116	43473116	2030430	11.9815	3.85846	0	1	0	1	0	0	0	0	0	2	0	0	0	0	0	0	0	0	2	CMEF
chr5	110808678	110809078	chr12	132379430	132381430	1033740	11.9066	2.87903	0	0	1	0	0	0	0	0	0	1	0	0	0	1	0	0	0	1	2	CMEF
chrX	13281856	13282256	chrX	41193477	41195477	1046278	11.8438	4.29259	0	0	0	0	0	1	0	0	0	1	0	0	0	0	0	0	0	0	2	CMEF
chr1	167283662	167284062	chr1	165797169	165799169	1002377	11.8165	4.41515	0	0	0	0	0	1	0	0	0	1	0	0	0	0	0	0	0	0	2	CMEF
chr15	88863023	88863450	chr22	50354159	50356159	1015977	11.7943	4.79414	0	0	0	0	0	1	0	0	0	1	0	0	0	0	0	0	0	0	2	CMEF
chr4	141571316	141571749	chr1	16125929	16127929	2031650	11.6725	1.98353	0	0	0	1	1	0	0	0	0	2	0	0	0	0	0	0	1	1	2	CMEF
chr13	58127184	58127606	chr5	137087810	137089810	1012051	11.6603	4.67824	0	0	0	0	0	1	0	0	0	1	0	0	0	0	0	0	0	0	2	CMEF
chr7	107210376	107210776	chr11	7110430	7112430	1039906	11.6512	0.776974	0	0	0	0	0	1	0	0	0	1	0	0	0	0	0	0	0	0	2	CMEF
chr19	5849044	5849682	chr11	65184015	65186015	3021790	11.6149	2.62096	0	0	1	1	0	0	0	0	1	3	0	0	0	0	0	0	0	0	2	CMEF
chr4	141286530	141287199	chr1	16499396	16501396	2031616	11.6118	2.26814	0	0	0	1	1	0	0	0	0	2	0	0	0	0	0	0	0	0	2	CMEF
chr8	84191938	84192957	chr19	13960786	13962786	3042278	11.5956	2.98589	0	0	1	0	1	1	0	0	0	3	0	0	0	0	0	1	0	1	2	CMEF
chr7	3217443	3217891	chr19	54289134	54291134	2037794	11.5888	2.48507	0	1	0	1	0	0	0	0	0	2	0	0	0	0	0	0	0	0	2	CMEF
chr7	45559246	45559646	chr19	49334327	49336327	1038974	11.5002	1.36677	0	0	0	1	0	0	0	0	0	1	0	0	0	0	0	0	0	0	2	CMEF
chr12	86801130	86802123	chr14	77384655	77386655	3010405	11.4741	3.72405	0	0	1	1	0	1	0	0	0	3	0	0	0	0	0	0	0	0	2	CMEF
chr1	153009201	153009601	chr1	183324716	183326716	1002104	11.4503	0.857746	0	0	0	1	0	0	0	0	0	1	0	0	0	0	0	0	0	0	2	CMEF
chr7	144943192	144943675	chr11	69450540	69452540	2040866	11.4382	1.72505	0	0	1	0	0	1	0	0	0	2	0	0	0	0	0	0	0	0	2	CMEF
chr5	110106970	110108432	chr19	58911944	58913944	3033700	11.4172	1.42497	0	0	1	0	1	1	0	0	0	3	0	0	0	0	0	0	0	0	2	CMEF
chr9	62343888	62345007	chr15	69109167	69111167	3044750	11.3757	4.68538	0	0	1	0	1	1	0	0	0	3	0	0	0	0	0	0	0	0	2	CMEF
chr18	84589709	84590139	chr18	72263773	72265773	1021583	11.3132	4.62978	0	0	0	0	0	1	0	0	0	1	0	0	0	0	0	0	0	0	2	CMEF
chr15	77356520	77356920	chr22	36516101	36518101	1015496	11.2669	0.924313	0	0	1	0	0	0	0	0	0	1	0	0	0	0	0	0	0	0	2	CMEF
chr9	72663152	72663552	chr15	56283825	56285825	1045071	11.1683	2.09262	0	0	1	0	0	0	0	0	0	1	0	0	0	0	0	0	0	0	2	CMEF
chr18	35554289	35554689	chr5	138610967	138612967	1020645	11.1551	5.72291	0	0	0	0	0	0	0	0	1	1	0	0	0	0	0	0	0	0	2	CMEF
chr13	23746122	23746602	chr6	26043365	26045365	1011294	11.1252	1.83293	0	0	0	0	0	1	0	0	0	1	0	0	0	0	0	0	0	0	2	CMEF
chr8	122522776	122523639	chr16	88824913	88826913	4043325	11.0787	2.18445	0	1	1	1	1	0	0	0	0	4	0	0	0	0	0	0	0	0	2	CMEF
chr4	123663787	123664252	chr1	39570841	39572841	1030564	11.0346	5.19086	0	0	0	0	0	1	0	0	0	1	0	0	0	0	0	0	0	0	2	CMEF
chr8	84977243	84977643	chr19	12902581	12904581	1042354	10.9937	2.41764	0	0	0	1	0	0	0	0	0	1	0	0	0	0	0	0	0	0	2	CMEF
chr18	75343190	75343590	chr18	46500876	46502876	1021356	10.9921	3.32936	0	0	0	0	0	1	0	0	0	1	0	0	0	0	0	0	0	0	2	CMEF
chr15	25364262	25365240	chr5	17274602	17276602	3014752	10.9536	1.76652	0	0	1	1	0	1	0	0	0	3	0	0	0	0	0	0	0	0	2	CMEF
chr10	98914228	98914942	chr12	90102179	90104179	2004914	10.9389	3.14747	0	0	1	0	0	1	0	0	0	2	0	0	0	0	0	0	0	0	2	CMEF
chr8	84976074	84976794	chr19	12903669	12905669	4042353	10.8987	2.21505	0	0	1	0	1	1	0	1	0	4	0	0	0	1	0	0	0	1	2	CMEF
chr9	124423031	124424838	chrX	333383	335383	3046144	10.8906	1	0	0	1	0	1	1	0	0	0	3	0	0	0	0	0	0	1	1	2	CMEF
chr11	106500801	106501502	chr17	62222522	62224522	2008505	10.8843	5.25542	0	0	1	0	0	1	0	0	0	2	0	0	0	0	0	0	0	0	2	CMEF
chr2	26132792	26133627	chr9	139000928	139002928	3023431	10.8826	5.87462	0	0	1	1	0	1	0	0	0	3	0	0	0	0	0	0	0	0	2	CMEF
chr8	36549062	36549494	chr8	12914916	12916916	5041491	10.8351	1.13086	0	0	1	1	1	1	0	0	1	5	0	0	0	0	0	0	0	0	2	CMEF
chr18	56678546	56678946	chr5	126071113	126073113	1021015	10.8115	1.10058	0	0	1	0	0	0	0	0	0	1	0	0	0	0	0	0	0	0	2	CMEF
chr4	133103998	133104513	chr1	27843296	27845296	4031059	10.7803	1.12429	0	0	1	1	1	1	0	0	0	4	0	0	0	0	0	0	0	0	2	CMEF
chr11	116672650	116673050	chr17	74554595	74556595	1008868	10.7671	2.74105	0	0	0	0	1	0	0	0	0	1	0	0	0	0	0	0	0	0	2	CMEF
chr9	72639909	72640346	chr15	56341718	56343718	2045068	10.7632	1.00515	0	0	1	0	0	0	0	0	1	2	0	0	0	0	0	0	0	0	2	CMEF
chr5	24750650	24751129	chr7	151128138	151130138	1032442	10.7611	1.20861	0	0	0	0	0	1	0	0	0	1	0	0	0	0	0	0	0	0	2	CMEF
chr7	3367291	3367691	chr19	54445195	54447195	1037811	10.7518	2.26562	0	0	0	1	0	0	0	0	0	1	0	0	0	0	0	0	0	0	2	CMEF
chr3	88509578	88510516	chr1	156075268	156077268	5027705	10.7435	3.98636	0	0	1	0	1	1	0	1	1	5	0	0	0	0	0	0	0	0	2	CMEF
chr1	153093143	153093552	chr1	183247459	183249459	2002111	10.7413	3.14747	1	1	0	0	0	0	0	0	0	2	0	0	0	0	0	0	0	0	2	CMEF
chr18	75342431	75343064	chr18	46501607	46503607	2021355	10.7384	3.19781	0	0	1	0	0	1	0	0	0	2	0	0	0	0	0	0	0	0	2	CMEF
chr13	55190028	55191174	chr5	176542923	176544923	5011956	10.7219	1.78354	0	0	1	1	1	1	0	0	1	5	0	0	0	0	0	0	0	0	2	CMEF
chr1	153096052	153096452	chr1	183244993	183246993	1002113	10.7174	1.42398	0	0	1	0	0	0	0	0	0	1	0	0	0	0	0	0	0	0	2	CMEF
chr19	5805890	5806907	chr11	65260427	65262427	3021780	10.7104	2.80265	0	1	0	1	0	0	0	0	1	3	0	0	0	0	0	0	0	0	2	CMEF
chr19	23089657	23090150	chr9	73067046	73069046	2022141	10.6994	0.857746	0	0	0	1	0	1	0	0	0	2	0	0	0	0	0	0	0	0	2	CMEF
chr15	102399494	102399969	chr12	53764198	53766198	3016464	10.6732	3.44325	0	0	1	0	1	1	0	0	0	3	0	0	0	1	0	1	0	2	2	CMEF
chr11	104289089	104290137	chr17	44050422	44052422	5008439	10.6692	1.21393	0	0	1	1	1	1	0	0	1	5	0	0	0	0	0	0	0	0	2	CMEF
chr11	19919446	19919846	chr2	65663213	65665213	1005776	10.6047	2.57146	0	0	0	1	0	0	0	0	0	1	0	0	0	0	0	0	1	1	2	CMEF
chr18	36253258	36253718	chr5	139466444	139468444	3020696	10.5473	0.738109	0	0	0	1	1	0	0	0	0	2	0	0	0	0	0	0	0	0	2	CMEF
chr7	45465563	45465963	chr19	49458158	49460158	1038958	10.5458	4.93893	0	0	0	0	0	0	0	0	1	1	0	0	0	0	0	0	0	0	2	CMEF
chr1	185209688	185210254	chr1	220433259	220435259	2002757	10.5401	0.749906	0	0	1	0	1	0	0	0	0	2	0	0	0	0	0	0	0	0	2	CMEF
chr2	152178202	152178602	chr20	553597	555597	1025642	10.5344	1.60741	0	0	0	1	0	0	0	0	0	1	0	0	0	0	0	0	0	0	2	CMEF
chr7	128460380	128460780	chr10	121354387	121356387	1040421	10.5175	4.4593	0	0	1	0	0	0	0	0	0	1	0	0	0	0	0	0	0	0	2	CMEF
chr10	95515572	95515972	chr12	93833981	93835981	1004871	10.502	4.09501	0	0	0	0	0	1	0	0	0	1	0	0	0	0	0	0	0	0	2	CMEF
chr17	29078856	29079272	chr6	36634090	36636090	2018727	10.4909	4.61268	0	0	1	0	0	1	0	0	0	2	0	0	0	0	0	0	0	0	2	CMEF
chr11	60175764	60176164	chr17	17684528	17686528	1006586	10.4506	2.6204	0	0	0	0	0	1	0	0	0	1	0	0	0	0	0	0	0	0	2	CMEF
chr5	110808243	110808643	chr12	132379806	132381806	1033739	10.4053	2.58541	0	0	1	0	0	0	0	0	0	1	0	0	0	1	0	0	0	1	2	CMEF
chr14	52067566	52067966	chr14	21668319	21670319	1013604	10.379	0.654517	0	0	1	0	0	0	0	0	0	1	0	0	0	0	0	0	0	0	2	CMEF
chr14	120911454	120911854	chr13	98628415	98630415	1014472	10.3665	5.9997	0	0	0	0	0	1	0	0	0	1	0	0	0	1	0	0	0	1	2	CMEF
chr2	129801358	129801760	chr20	2082569	2084569	1025279	10.3489	4.4593	0	0	0	0	0	1	0	0	0	1	0	0	0	0	0	0	1	1	2	CMEF
chr4	8691446	8691871	chr8	61591576	61593576	1028917	10.33	3.58832	0	0	0	0	0	1	0	0	0	1	0	0	0	1	0	0	0	1	2	CMEF
chr16	17219930	17220536	chr22	21885134	21887134	3016877	10.3218	1.01366	0	0	1	1	0	1	0	0	0	3	0	0	0	0	0	0	0	0	2	CMEF
chr5	134945179	134945679	chr7	73245789	73247789	4034745	10.3086	4.05609	1	0	1	0	1	0	0	0	1	4	0	0	0	0	0	0	0	0	2	CMEF
chr7	3366676	3367076	chr19	54444496	54446496	2037810	10.2926	1.92809	0	0	1	0	0	1	0	0	0	2	0	0	0	0	0	0	0	0	2	CMEF
chr1	119047812	119048240	chr2	121498460	121500460	1001524	10.283	4.9066	0	0	0	0	0	1	0	0	0	1	0	0	0	0	0	0	0	0	2	CMEF
chr8	22426802	22427330	chr13	52749184	52751184	2041180	10.2717	1.04719	1	0	0	0	0	1	0	0	0	2	0	0	0	0	0	0	0	0	2	CMEF
chr3	102164850	102165250	chr1	116226308	116228308	1028095	10.257	1.29035	0	0	0	1	0	0	0	0	0	1	0	0	0	0	0	0	0	0	2	CMEF
chr4	141559215	141559615	chr1	16142264	16144264	1031647	10.2078	1.29352	0	0	0	0	0	0	0	0	1	1	0	0	0	0	0	0	0	0	2	CMEF
chr18	35022394	35023233	chr5	137978393	137980393	4020626	10.2019	1.59574	0	0	0	1	1	1	0	0	1	4	0	0	0	0	0	0	0	0	2	CMEF
chr1	60852395	60852853	chr2	204673048	204675048	2000728	10.1375	0.939342	0	0	1	0	1	0	0	0	0	2	0	0	0	0	0	0	0	0	2	CMEF
chr12	86800286	86800686	chr14	77383575	77385575	1010404	10.1094	2.89619	0	0	0	1	0	0	0	0	0	1	0	0	0	0	0	0	0	0	2	CMEF
chr3	129533727	129534171	chr4	111117055	111119055	1028485	10.0794	6.20104	0	0	0	0	0	1	0	0	0	1	0	0	0	1	0	0	0	1	2	CMEF
chr14	115040527	115041126	chr13	91998810	92000810	3014388	10.0698	5.11887	0	0	1	0	1	1	0	0	0	3	0	0	0	0	0	0	0	0	2	CMEF
chr11	74838329	74838859	chr17	2295174	2297174	4007092	10.0434	4.50308	0	0	1	0	0	1	0	1	1	4	0	0	0	0	0	0	0	0	2	CMEF
chr4	55479357	55479757	chr9	110185303	110187303	1029554	10.0154	1.05286	0	0	0	0	0	0	0	0	1	1	0	0	0	0	0	0	0	0	2	CMEF
chr7	27332362	27332805	chr19	41107414	41109414	2038352	9.99791	1.89809	0	0	0	0	0	1	0	0	1	2	0	0	0	0	0	0	0	0	2	CMEF
chr8	79030897	79031318	chr4	146856024	146858024	2042157	9.9852	6.04328	0	0	0	1	0	0	0	0	1	2	0	0	0	0	0	0	0	0	2	CMEF
chr5	20702506	20702934	chr7	77647542	77649542	1032324	9.98056	1.9863	0	0	0	0	0	1	0	0	0	1	0	0	0	0	0	0	0	0	2	CMEF
chr17	33817454	33817958	chr19	8399160	8401160	2018955	9.97418	1.52969	0	0	1	0	0	1	0	0	0	2	0	0	0	0	0	0	0	0	2	CMEF
chr5	20701823	20702311	chr7	77648313	77650313	3032323	9.96639	2.67732	0	0	1	0	1	1	0	0	0	3	0	0	0	0	0	0	0	0	2	CMEF
chr15	82898845	82899553	chr22	42664982	42666982	2015776	9.94903	4.61362	0	0	1	0	0	1	0	0	0	2	0	0	0	0	0	0	0	0	2	CMEF
chr4	11006343	11006837	chr8	96146082	96148082	1028954	9.92627	1.84345	0	0	1	0	0	0	0	0	0	1	0	0	0	0	0	0	0	0	2	CMEF
chr11	86756425	86756825	chr17	57697172	57699172	1007524	9.92494	4.87559	0	0	0	1	0	0	0	0	0	1	0	0	0	0	0	0	0	0	2	CMEF
chr4	136462326	136462805	chr1	23503251	23505251	2031345	9.9048	0.82409	0	0	1	0	0	1	0	0	0	2	0	0	0	0	0	0	0	0	2	CMEF
chr2	128241281	128241681	chr2	112020755	112022755	1025230	9.89706	0.919165	0	0	0	0	0	0	0	0	1	1	0	0	0	0	0	0	0	0	2	CMEF
chr4	127022070	127022570	chr1	35656685	35658685	2030748	9.8913	4.41968	0	0	1	0	0	1	0	0	0	2	0	0	0	0	0	0	0	0	2	CMEF
chr15	77335684	77336084	chr22	36460410	36462410	1015490	9.88127	2.02899	0	0	0	1	0	0	0	0	0	1	0	0	0	0	0	0	0	0	2	CMEF
chr1	119076704	119077104	chr2	121460134	121462134	1001532	9.873	1.75431	0	0	0	1	0	0	0	0	0	1	0	0	0	0	0	0	0	0	2	CMEF
chr7	139363935	139364390	chr10	134329696	134331696	3040646	9.86668	2.42988	0	0	1	1	0	0	0	0	1	3	0	0	0	0	0	0	0	0	2	CMEF
chr11	74837633	74838065	chr17	2296156	2298156	3007091	9.86063	3.7744	0	0	1	0	1	1	0	0	0	3	0	0	0	0	0	0	0	0	2	CMEF
chr7	80188791	80189191	chr15	90729515	90731515	1039457	9.79598	1.73792	0	1	0	0	0	0	0	0	0	1	0	0	0	0	0	0	0	0	2	CMEF
chr14	21832124	21832524	chr10	76970347	76972347	1013193	9.77464	5.35056	0	0	0	1	0	0	0	0	0	1	0	0	0	0	0	0	0	0	2	CMEF
chr11	96713252	96713926	chr17	46256000	46258000	2007909	9.74676	0.894408	0	0	0	1	0	0	0	0	1	2	0	0	0	0	0	0	0	0	2	CMEF
chr5	123376476	123376876	chr12	122499782	122501782	1034408	9.73285	1.75932	0	0	0	0	0	0	0	0	1	1	0	0	0	0	0	0	0	0	2	CMEF
chr10	77190994	77191513	chr21	46805597	46807597	3004237	9.72025	1.35628	0	0	1	1	0	0	0	0	1	3	0	0	0	0	0	0	0	0	2	CMEF
chr4	141572888	141573288	chr1	16121919	16123919	1031651	9.70505	1.13237	0	0	0	1	0	0	0	0	0	1	0	0	0	0	0	0	0	0	2	CMEF
chr3	68495112	68495532	chr3	159481993	159483993	1027458	9.65743	2.87656	0	0	0	0	0	1	0	0	0	1	0	0	0	0	0	0	0	0	2	CMEF
chr16	17233288	17233759	chr22	21870846	21872846	3016879	9.6534	1	0	0	1	0	1	1	0	0	0	3	0	0	0	0	0	0	0	0	2	CMEF
chr2	26458798	26459198	chr9	139388960	139390960	1023452	9.6066	1.59223	0	0	0	0	1	0	0	0	0	1	0	0	0	0	0	0	0	0	2	CMEF
chr11	20543082	20543528	chr2	64976982	64978982	2005821	9.60263	3.89079	0	0	1	0	0	1	0	0	0	2	0	0	0	0	1	0	0	1	2	CMEF
chr1	182031110	182031530	chr1	225855416	225857416	2002681	9.59998	0.775848	0	0	1	0	1	0	0	0	0	2	0	0	0	0	0	0	0	0	2	CMEF
chr14	27673939	27674339	chr3	56443248	56445248	1013312	9.59705	0.845185	0	0	0	0	0	1	0	0	0	1	0	0	0	0	0	0	0	0	2	CMEF
chr8	89024809	89025209	chr16	51166357	51168357	1042479	9.59614	1.70307	0	0	0	0	0	0	0	1	0	1	0	0	0	0	0	0	0	0	2	CMEF
chr7	73539013	73539509	chr15	93445111	93447111	2039330	9.52372	2.72124	1	1	0	0	0	0	0	0	0	2	0	0	0	0	0	0	0	0	2	CMEF
chr7	34233931	34234371	chr19	34849460	34851460	2038643	9.52002	2.85961	0	0	1	0	0	1	0	0	0	2	0	0	0	0	0	0	0	0	2	CMEF
chr11	88583170	88583715	chr17	55485114	55487114	3007610	9.51314	2.70286	1	1	1	0	0	0	0	0	0	3	0	0	0	0	0	0	0	0	2	CMEF
chr3	102167601	102168001	chr1	116222711	116224711	1028096	9.51001	1.08368	0	0	0	1	0	0	0	0	0	1	0	0	0	0	0	0	0	0	2	CMEF
chr4	123625269	123625755	chr1	39605920	39607920	5030554	9.43634	3.09372	0	1	1	1	1	1	0	0	0	5	0	0	0	0	0	0	0	0	2	CMEF
chr13	64152235	64152673	chr9	99178661	99180661	2012189	9.43324	3.61725	0	0	1	0	0	1	0	0	0	2	0	0	0	0	0	0	0	0	2	CMEF
chr7	110164768	110165168	chr11	9634788	9636788	1039962	9.4056	3.59944	0	0	1	0	0	0	0	0	0	1	0	0	0	0	0	0	0	0	2	CMEF
chr4	134116978	134117435	chr1	26618665	26620665	2031168	9.40238	1.02374	0	0	0	1	1	0	0	0	0	2	0	0	0	0	0	0	0	0	2	CMEF
chr14	27347862	27348262	chr3	56820934	56822934	1013304	9.39974	1.1381	0	0	0	1	0	0	0	0	0	1	0	0	0	0	0	0	0	0	2	CMEF
chr7	25433077	25433608	chr19	42964559	42966559	3038305	9.39738	1.61991	0	1	0	0	1	1	0	0	0	3	0	0	0	0	0	0	0	0	2	CMEF
chr3	121601885	121602333	chr1	95178525	95180525	2028372	9.39436	1.76933	0	0	1	1	0	0	0	0	0	2	0	0	0	0	0	0	0	0	2	CMEF
chr19	23091728	23092128	chr9	73064955	73066955	1022142	9.38723	0.890054	0	0	0	1	0	0	0	0	0	1	0	0	0	0	0	0	0	0	2	CMEF
chr18	75343872	75344272	chr18	46500138	46502138	1021357	9.38464	2.75588	0	0	0	1	0	0	0	0	0	1	0	0	0	0	0	0	0	0	2	CMEF
chr11	88581989	88582389	chr17	55486699	55488699	1007609	9.38315	1.73811	0	0	0	0	0	0	0	0	1	1	0	0	0	0	0	0	0	0	2	CMEF
chr8	45064148	45064548	chr4	187490674	187492674	1041567	9.37725	1.05863	0	0	0	1	0	0	0	0	0	1	0	0	0	0	0	0	0	0	2	CMEF
chr10	82860344	82860771	chr12	104681728	104683728	2004595	9.37543	2.10388	0	0	1	0	0	1	0	0	0	2	0	0	0	0	0	0	0	0	2	CMEF
chr4	133094264	133094664	chr1	27845787	27847787	1031057	9.37029	1.73799	0	0	0	1	0	0	0	0	0	1	0	0	0	0	0	0	0	0	2	CMEF
chr4	141287921	141288321	chr1	16497516	16499516	1031617	9.3456	1.61991	0	0	0	1	0	0	0	0	0	1	0	0	0	0	0	0	0	0	2	CMEF
chr1	172149072	172149472	chr1	160230116	160232116	1002477	9.34186	4.26436	0	0	0	0	0	0	0	0	1	1	0	0	0	0	0	0	0	0	2	CMEF
chr14	7953916	7954536	chr3	58160357	58162357	3012977	9.34125	2.02893	0	1	1	0	1	0	0	0	0	3	0	0	0	0	0	0	0	0	2	CMEF
chr7	73540387	73540787	chr15	93443711	93445711	1039331	9.31753	3.33392	0	0	0	1	0	0	0	0	0	1	0	0	0	0	0	0	1	1	2	CMEF
chr7	79661288	79661688	chr15	90118875	90120875	1039420	9.30507	4.34711	0	1	0	0	0	0	0	0	0	1	0	0	0	0	0	0	0	0	2	CMEF
chr8	106610903	106611328	chr16	68777827	68779827	2042823	9.29267	2.40577	1	0	0	0	0	0	0	0	1	2	0	0	0	0	0	0	0	0	2	CMEF
chr1	182028771	182029171	chr1	225853701	225855701	1002679	9.27707	0.757394	0	0	0	0	0	0	0	0	1	1	0	0	0	0	0	0	0	0	2	CMEF
chrX	10717084	10717533	chrX	38662245	38664245	2046218	9.25567	4.0625	0	0	1	0	0	1	0	0	0	2	0	0	0	0	0	0	1	1	2	CMEF
chr4	133353338	133353768	chr1	27517642	27519642	2031083	9.25506	0.841591	0	0	1	0	0	1	0	0	0	2	0	0	0	0	0	0	0	0	2	CMEF
chr7	96212837	96213331	chr11	79147899	79149899	3039668	9.25002	1.87057	0	0	1	1	0	1	0	0	0	3	0	0	0	0	0	0	0	0	2	CMEF
chr3	95270768	95271168	chr1	150986788	150988788	1027885	9.24584	1.07393	0	0	0	0	0	0	0	0	1	1	0	0	0	0	0	0	0	0	2	CMEF
chr18	84588644	84589206	chr18	72264784	72266784	2021582	9.2215	3.71706	0	0	1	0	0	1	0	0	0	2	0	0	0	0	0	0	0	0	2	CMEF
chr6	124805502	124805915	chr12	6999334	7001334	2037282	9.20902	3.96917	0	0	1	0	0	1	0	0	0	2	0	0	0	0	0	1	0	1	2	CMEF
chr11	77906517	77906922	chr17	27354099	27356099	1007236	9.20463	1.81605	0	0	0	0	0	1	0	0	0	1	0	0	0	0	0	0	0	0	2	CMEF
chr14	27348580	27349108	chr3	56819828	56821828	2013305	9.20349	1.03728	1	0	0	0	0	1	0	0	0	2	0	0	0	0	0	0	0	0	2	CMEF
chr14	34548993	34549722	chr10	88470272	88472272	3013442	9.20243	4.59515	0	0	1	0	0	1	0	0	1	3	0	0	0	0	0	0	0	0	2	CMEF
chr6	30174015	30175073	chr7	129419492	129421492	3035670	9.19406	2.93348	0	0	1	0	1	1	0	0	0	3	0	0	0	0	0	0	1	1	2	CMEF
chr8	89025611	89026392	chr16	51167593	51169593	2042480	9.16384	2.20171	0	0	1	0	0	1	0	0	0	2	0	0	0	0	0	0	0	0	2	CMEF
chrX	74245608	74246044	chrX	153598000	153600000	1046574	9.15662	4.78364	0	0	0	0	0	1	0	0	0	1	0	0	0	0	0	0	0	0	2	CMEF
chr17	70750490	70751518	chr18	3597463	3599463	4019774	9.15139	3.71885	1	0	1	0	0	1	0	0	1	4	0	0	0	0	0	0	0	0	2	CMEF
chr15	98992982	98993508	chr12	49627344	49629344	3016251	9.13296	2.72051	0	0	1	0	1	1	0	0	0	3	0	0	0	1	0	0	0	1	2	CMEF
chr19	5809671	5810452	chr11	65256774	65258774	3021782	9.13233	2.13567	0	0	0	0	1	1	0	0	1	3	0	0	0	0	0	0	0	0	2	CMEF
chr1	15791575	15792091	chr8	73906178	73908178	2000170	9.11835	2.62536	1	1	0	0	0	0	0	0	0	2	0	0	0	0	0	0	0	0	2	CMEF
chr5	64811454	64812458	chr4	38674174	38676174	4033022	9.0922	3.04733	1	0	1	0	1	0	0	0	1	4	0	0	0	0	0	0	0	0	2	CMEF
chr2	20673198	20673598	chr10	24678125	24680125	1023310	9.0846	1.7276	1	0	0	0	0	0	0	0	0	1	0	0	0	0	0	0	0	0	2	CMEF
chr6	82702599	82702999	chr2	75146154	75148154	1036393	9.07783	0.803648	0	0	0	0	0	0	0	0	1	1	0	0	0	0	0	0	0	0	2	CMEF
chr5	74092854	74093534	chr4	53577974	53579974	2033187	9.07529	4.44921	0	0	1	0	0	1	0	0	0	2	0	0	0	0	0	1	0	1	2	CMEF
chr4	129230939	129231564	chr1	33226272	33228272	2030830	9.07257	4.56524	0	0	0	1	1	0	0	0	0	2	0	0	0	0	0	0	0	0	2	CMEF
chr1	182018245	182018645	chr1	225838286	225840286	1002677	9.07118	4.25456	0	0	1	0	0	0	0	0	0	1	0	0	0	0	0	0	0	0	2	CMEF
chrX	101332634	101333034	chrX	70401197	70403197	1046709	9.06737	3.84101	0	0	0	0	0	1	0	0	0	1	0	0	0	0	0	0	0	0	2	CMEF
chr4	55480220	55480781	chr9	110186591	110188591	2029555	9.05004	1.12574	0	0	1	0	0	1	0	0	0	2	0	0	0	0	0	0	0	0	2	CMEF
chr4	106847523	106848610	chr1	54945424	54947424	3030101	9.04506	1.57107	0	0	1	1	0	0	0	1	0	3	0	0	0	0	0	0	0	0	2	CMEF
chr2	20665640	20666040	chr10	24671394	24673394	1023308	9.02481	2.45764	0	1	0	0	0	0	0	0	0	1	0	0	0	0	0	0	0	0	2	CMEF
chr17	70754941	70755341	chr18	3593385	3595385	1019775	9.02251	4.04983	0	0	0	0	0	0	0	0	1	1	0	0	0	0	1	0	0	1	2	CMEF
chr4	141598254	141599345	chr1	16085858	16087858	5031652	9.01588	3.13805	1	1	0	1	0	0	0	1	1	5	0	0	0	0	0	0	0	0	2	CMEF
chr4	156188984	156189427	chr1	964727	966727	4032201	9.00372	1.04547	0	0	0	1	1	1	0	0	1	4	0	0	0	0	0	0	0	0	2	CMEF
chr6	124745381	124745853	chr12	7046346	7048346	2037275	8.99813	4.46053	0	0	1	0	0	1	0	0	0	2	0	0	0	0	0	1	0	1	2	CMEF
chr7	133115841	133116328	chr10	126840730	126842730	2040538	8.97439	5.68532	0	0	0	1	0	0	0	0	1	2	0	0	0	0	0	0	0	0	2	CMEF
chr13	63979461	63980379	chr9	98887366	98889366	3012179	8.97213	2.94382	1	1	1	0	0	0	0	0	0	3	0	0	0	0	0	0	0	0	2	CMEF
chr19	53460968	53461368	chr10	112169456	112171456	1022873	8.96378	1.35418	1	0	0	0	0	0	0	0	0	1	0	0	0	0	0	0	0	0	2	CMEF
chr4	136732582	136732982	chr1	23152404	23154404	1031358	8.95673	1.4984	0	0	0	1	0	0	0	0	0	1	0	0	0	0	0	0	0	0	2	CMEF
chr8	45063510	45063956	chr4	187491044	187493044	2041566	8.95202	1.01392	0	0	0	1	0	1	0	0	0	2	0	0	0	0	0	0	0	0	2	CMEF
chr5	134437403	134437803	chr7	73892808	73894808	1034719	8.94696	2.07533	0	0	0	0	0	1	0	0	0	1	0	0	0	0	0	0	0	0	2	CMEF
chr2	59231363	59231763	chr2	159400103	159402103	1024127	8.94115	0.961001	0	0	0	0	1	0	0	0	0	1	0	0	0	0	0	0	0	0	2	CMEF
chr18	34778585	34779009	chr5	137689147	137691147	3020612	8.94073	2.82162	1	0	1	1	0	0	0	0	0	3	0	0	0	0	0	0	0	0	2	CMEF
chr12	52381643	52382053	chr14	32419430	32421430	2009737	8.93876	1.23737	0	0	1	0	0	1	0	0	0	2	0	0	0	0	0	0	0	0	2	CMEF
chr10	21980761	21981161	chr6	134512837	134514837	1003284	8.91111	1.73813	0	0	0	0	0	1	0	0	0	1	0	0	0	0	0	0	0	0	2	CMEF
chr15	73183184	73183676	chr8	141642751	141644751	2015269	8.90468	2.37044	0	0	0	1	0	0	0	0	1	2	0	0	0	0	0	0	0	0	2	CMEF
chr6	148354430	148355049	chrX	71495071	71497071	3037754	8.88309	2.6693	0	0	1	1	0	1	0	0	0	3	0	0	0	0	0	0	0	0	2	CMEF
chr2	170184437	170184921	chr20	52275838	52277838	2026396	8.8825	2.24438	0	0	1	0	0	0	0	0	1	2	0	0	0	0	0	0	0	0	2	CMEF
chr2	165807581	165808149	chr20	45866850	45868850	2026115	8.86949	1.60523	0	0	0	0	0	1	0	0	1	2	0	0	0	0	0	0	0	0	2	CMEF
chrX	20704260	20704660	chrX	47091955	47093955	1046306	8.86201	3.42453	0	0	1	0	0	0	0	0	0	1	0	0	0	1	0	0	0	1	2	CMEF
chr10	40300726	40301715	chr6	111196115	111198115	4003507	8.82186	3.9724	0	0	1	1	0	1	0	0	1	4	0	0	0	0	0	0	0	0	2	CMEF
chr7	127932533	127933048	chr16	31149397	31151397	3040405	8.81662	2.1824	1	0	1	1	0	0	0	0	0	3	0	0	0	0	0	0	0	0	2	CMEF
chr8	111787691	111788091	chr16	75351103	75353103	1042998	8.79811	1.11325	0	0	0	1	0	0	0	0	0	1	0	0	0	0	0	0	0	0	2	CMEF
chr7	65066055	65066455	chr15	29764038	29766038	1039207	8.78769	1.19727	0	0	0	0	0	0	0	0	1	1	0	0	0	0	0	0	0	0	2	CMEF
chrX	94177845	94178246	chr6	63920530	63922530	2046648	8.78713	0.655554	0	0	1	0	0	1	0	0	0	2	0	0	0	0	0	0	0	0	2	CMEF
chr4	133117176	133117871	chr1	27830307	27832307	2031061	8.77566	3.57608	0	0	0	1	0	0	0	0	1	2	0	0	0	0	0	0	0	0	2	CMEF
chrX	164076010	164076491	chrX	15692625	15694625	2047023	8.76981	4.13925	0	0	0	0	0	1	0	0	1	2	0	0	0	0	0	0	0	0	2	CMEF
[truncated: 21,832 more rows]

## Sheet: Human_Tfbound_Clusters
Supplemental Table S1: Clustering of transcription factor bound regions in mouse and human ESCs.
Human_MTL_Chr	Human_MTL_start	Human_MTL_Stop	Lift_mm10_2k_chr	Lift_mm10_2k_start	Lift_mm10_2k_stop	ID	Mouse_Ac	Human_Ac	Oct4TF	Sox2	Nanog	Essrb	Klf4	Klf2	Smad1	Stat3	Tfcp2l1	Sum_M	Oct4TF_H	Sox2_H	Nanog_H	Stat3_H	Smad1_H	Klf5_H	Tcf4_H	Sum_H	Cluster_H	Cluster_H_Name
chr12	122238708	122239039	chr5	123138110	123140110	200010156	31.1908	11.1673	1	1	1	0	1	1	0	0	0	5	0	0	0	0	1	1	0	2	0	CHEF
chr12	122237821	122238299	chr5	123137309	123139309	100010155	28.492	9.52731	1	1	1	1	1	1	0	0	0	6	0	0	0	0	0	0	1	1	0	CHEF
chr1	245026151	245026721	chr1	178335552	178337552	300004009	27.0363	8.62882	0	0	0	0	1	0	0	0	0	1	0	0	0	1	1	0	1	3	0	CHEF
chrX	136657802	136658390	chrX	58039054	58041054	400045199	26.9346	5.23631	1	1	1	0	0	0	0	0	0	3	1	0	1	0	1	0	1	4	0	CHEF
chr12	31538798	31540314	chr6	148991759	148993759	500008732	26.1957	8.32003	1	1	1	0	1	0	0	1	0	5	1	1	1	0	1	0	1	5	0	CHEF
chrX	31252021	31252463	chrX	85076763	85078763	400044374	25.5549	1.39651	1	1	1	1	0	0	0	0	0	4	1	1	1	0	0	0	1	4	0	CHEF
chr8	103423336	103423796	chr15	38076713	38078713	200041542	24.8881	6.37188	1	1	1	0	1	0	0	1	0	5	0	0	1	0	1	0	0	2	0	CHEF
chr1	26945594	26946060	chr4	133814376	133816376	400000594	24.6995	2.03616	1	1	1	0	0	0	0	0	0	3	0	1	1	0	1	0	1	4	0	CHEF
chr4	95086239	95086797	chr6	65020982	65022982	200030142	24.6597	3.24542	1	1	1	1	1	1	0	1	0	7	0	0	1	0	0	0	1	2	0	CHEF
chr3	181577155	181577706	chr3	34755935	34757935	400028448	24.2715	6.58215	1	1	1	1	0	0	1	0	1	6	0	1	1	0	1	0	1	4	0	CHEF
chr11	57406651	57407333	chr2	84741686	84743686	500006920	24.2541	8.95106	0	0	1	0	0	0	0	0	0	1	1	1	1	0	0	1	1	5	0	CHEF
chr12	49454392	49454792	chr15	98871226	98873226	200008970	24.2211	7.40211	1	0	1	0	1	1	0	0	0	4	1	0	0	0	1	0	0	2	0	CHEF
chr20	50416007	50416839	chr2	168763769	168765769	400024310	22.9501	6.44253	1	1	1	0	0	0	1	0	0	4	1	0	1	0	1	0	1	4	0	CHEF
chr6	15208192	15209393	chr13	44704540	44706540	500034779	22.894	5.81637	1	1	1	1	0	0	1	0	0	5	1	1	1	0	1	0	1	5	0	CHEF
chr6	4772969	4773390	chr13	35737404	35739404	500034556	22.7562	4.07612	1	1	1	0	0	0	0	0	0	3	1	1	1	0	1	0	1	5	0	CHEF
chr3	181578016	181578427	chr3	34756971	34758971	200028449	21.9665	6.06205	1	1	1	1	0	1	1	1	0	7	0	0	1	0	1	0	0	2	0	CHEF
chr6	26183412	26184142	chr13	23585148	23587148	400035001	21.9415	4.9883	1	1	1	0	0	0	0	0	0	3	1	0	1	0	1	1	0	4	0	CHEF
chr20	30946924	30947392	chr2	153345867	153347867	300024007	21.4685	2.40339	1	1	1	1	1	0	0	0	0	5	0	0	1	0	1	1	0	3	0	CHEF
chr2	232275293	232275806	chr1	86310099	86312099	500023364	21.1369	6.12714	1	1	1	0	0	1	1	1	1	7	1	1	1	0	1	0	1	5	0	CHEF
chr3	32822040	32822677	chr9	114583556	114585556	700026108	21.0734	7.09649	1	1	1	0	1	1	1	0	0	6	1	1	1	1	1	1	1	7	0	CHEF
chr12	14413051	14413947	chr6	136469848	136471848	400008476	20.882	4.76709	1	1	1	1	1	1	0	1	1	8	0	0	1	1	1	1	0	4	0	CHEF
chr3	128901399	128901848	chr6	87849241	87851241	200027573	20.6763	7.76371	0	0	0	0	0	0	0	0	0	0	0	0	1	0	0	0	1	2	0	CHEF
chr6	37105309	37106254	chr17	29463351	29465351	500035413	20.6083	8.17863	1	0	0	0	0	0	0	0	0	1	0	1	1	0	1	1	1	5	0	CHEF
chr22	17849401	17849894	chr6	120664578	120666578	400025029	20.6008	7.84703	0	0	1	0	1	0	0	0	0	2	0	0	1	1	0	1	1	4	0	CHEF
chr14	101689332	101689900	chr12	109947555	109949555	300013101	20.5805	2.01497	1	1	1	1	1	1	0	0	0	6	1	1	1	0	0	0	0	3	0	CHEF
chr9	79305476	79306352	chr19	17137008	17139008	500042997	20.508	0.630042	1	1	1	1	1	0	1	0	0	6	1	1	1	0	1	0	1	5	0	CHEF
chrX	133308805	133309252	chrX	52745963	52747963	200045165	20.2625	4.23802	1	1	1	1	0	0	0	0	0	4	0	0	1	0	1	0	0	2	0	CHEF
chr1	200333103	200334473	chr1	136674142	136676142	400003196	19.9339	3.46707	1	1	1	1	0	0	0	0	1	5	1	0	1	0	1	0	1	4	0	CHEF
chr4	106083411	106083839	chr3	133531908	133533908	300030298	19.8797	0.680048	1	1	1	1	1	0	0	0	0	5	0	0	1	0	1	0	1	3	0	CHEF
chr1	16160435	16161794	chr4	141546078	141548078	500000319	19.7346	6.81781	0	1	1	0	1	1	0	0	0	4	0	1	1	0	1	1	1	5	0	CHEF
chrX	48897438	48897944	chrX	7764864	7766864	300044525	19.5369	5.5044	1	1	1	0	0	0	0	0	0	3	1	1	0	0	1	0	0	3	0	CHEF
chr7	12768747	12769147	chr12	39997327	39999327	200037683	19.2663	2.64417	1	1	1	1	0	0	0	0	1	5	0	1	0	0	1	0	0	2	0	CHEF
chr19	13275233	13275810	chr8	84654805	84656805	400018961	19.2438	7.99657	0	1	0	0	0	1	0	1	1	4	0	1	1	0	1	0	1	4	0	CHEF
chr5	16740757	16741455	chr15	25753005	25755005	500031805	18.8562	7.79264	1	1	1	0	0	0	0	0	0	3	1	1	1	0	1	0	1	5	0	CHEF
chr6	26224968	26225557	chr13	23561365	23563365	300035007	18.5259	4.0764	0	0	1	0	0	0	0	0	0	1	0	0	1	0	1	0	1	3	0	CHEF
chr20	45946712	45948920	chr2	165857089	165859089	600024237	18.254	9.82793	1	1	0	0	0	0	0	0	0	2	1	1	1	0	1	1	1	6	0	CHEF
chr3	156534090	156535067	chr3	65658358	65660358	400028071	18.2424	2.04166	1	1	1	1	1	1	0	0	0	6	1	0	0	1	1	1	0	4	0	CHEF
chr3	181433267	181434151	chr3	34652844	34654844	400028440	18.0461	6.06482	1	1	1	0	0	0	0	0	1	4	1	1	1	0	1	0	0	4	0	CHEF
chr1	226133292	226133800	chr1	180887887	180889887	400003677	17.9783	3.34364	1	1	1	1	1	1	0	0	0	6	1	1	1	0	1	0	0	4	0	CHEF
chr4	87880510	87881498	chr5	103723518	103725518	500030029	17.9282	6.88074	1	1	1	1	1	1	1	0	1	8	1	1	1	0	1	0	1	5	0	CHEF
chr6	26285611	26285945	chr13	23530081	23532081	100035015	17.9076	7.11543	0	0	1	0	0	0	1	0	0	2	0	0	0	0	1	0	0	1	0	CHEF
chr3	181432957	181433245	chr3	34652287	34654287	100028439	17.877	6.3812	1	1	1	0	0	0	0	0	1	4	0	0	0	0	0	0	1	1	0	CHEF
chr1	39608218	39608671	chr4	123623068	123625068	100000838	17.8039	2.51954	1	1	1	1	0	0	1	0	1	6	0	0	0	0	1	0	0	1	0	CHEF
chr5	76103785	76104569	chr13	95533455	95535455	600032625	17.7708	6.01354	1	1	1	0	1	0	0	1	1	6	1	1	1	0	1	1	1	6	0	CHEF
chr2	85362025	85362534	chr6	72786505	72788505	400021144	17.738	6.14707	1	1	1	1	1	1	0	0	1	7	1	1	1	0	0	0	1	4	0	CHEF
chr10	126840422	126840646	chr7	133114085	133116085	200006012	17.708	5.42036	1	1	1	1	1	1	0	1	1	8	0	0	0	0	1	0	1	2	0	CHEF
chr2	179492116	179492468	chr2	76804293	76806293	200022569	17.5834	1.94918	1	1	1	0	0	0	0	0	0	3	0	0	0	0	1	0	1	2	0	CHEF
chr1	43474018	43474900	chr4	119070924	119072924	600000893	17.515	5.51359	1	1	1	1	1	1	1	0	1	8	1	1	1	1	1	0	1	6	0	CHEF
chr14	61146226	61146662	chr12	73085086	73087086	500012443	17.4028	2.37044	1	1	1	1	1	1	1	0	0	7	1	1	1	0	1	0	1	5	0	CHEF
chr6	37093559	37094576	chr17	29450341	29452341	400035412	17.3958	6.98711	1	1	1	1	1	0	1	0	1	7	0	0	1	0	1	1	1	4	0	CHEF
chr5	76103011	76103527	chr13	95534131	95536131	300032624	17.2936	6.03298	1	1	1	0	1	0	0	1	1	6	0	0	1	0	1	0	1	3	0	CHEF
chr21	33102874	33103374	chr16	90282270	90284270	400024756	17.213	3.9619	1	0	0	0	1	0	0	0	0	2	1	1	1	0	0	0	1	4	0	CHEF
chr18	8662179	8662660	chr17	66479045	66481045	400017654	17.0903	2.58205	1	1	1	1	1	1	1	0	1	8	1	1	1	0	0	0	1	4	0	CHEF
chr18	3602846	3604336	chr17	70747055	70749055	500017557	17.0846	6.91311	1	1	1	0	0	0	0	0	0	3	1	1	1	0	1	0	1	5	0	CHEF
chr7	155302564	155303200	chr5	28209128	28211128	500039967	17.0507	0.866781	1	1	1	1	1	1	1	0	0	7	1	1	1	0	1	0	1	5	0	CHEF
chr10	65389710	65389980	chr10	67001965	67003965	100004970	16.9028	5.4896	1	1	1	0	1	1	0	0	1	6	0	0	0	0	1	0	0	1	0	CHEF
chr10	65389213	65389651	chr10	67002342	67004342	500004969	16.8508	5.2747	1	1	1	1	1	1	0	0	1	7	1	1	1	0	1	0	1	5	0	CHEF
chr12	14410372	14411231	chr6	136467624	136469624	600008475	16.8363	6.73061	0	0	0	0	0	0	0	0	1	1	1	1	1	0	1	1	1	6	0	CHEF
chr15	31598679	31599168	chr7	63956223	63958223	400013352	16.8215	4.46453	1	1	1	1	1	1	0	0	0	6	1	1	1	0	0	0	1	4	0	CHEF
chr3	72585473	72585873	chr6	100376510	100378510	200026822	16.6796	1.17794	1	1	1	0	1	1	0	0	1	6	0	0	1	0	0	0	1	2	0	CHEF
chr2	16245527	16246324	chr12	12783455	12785455	300020029	16.4972	8.25659	1	1	1	0	0	0	0	1	0	4	0	0	1	0	1	0	1	3	0	CHEF
chr13	34116944	34117760	chr5	151368151	151370151	500010611	16.4334	6.41082	0	0	1	0	1	1	0	0	1	4	1	1	1	0	1	0	1	5	0	CHEF
chr21	46798071	46798744	chr10	77196749	77198749	500024991	16.2786	3.70676	0	1	0	1	0	0	0	0	0	2	1	1	1	0	1	0	1	5	0	CHEF
chrX	40028505	40029000	chrX	12152360	12154360	500044439	16.1941	4.68444	1	1	1	0	0	0	0	0	0	3	1	1	1	0	1	0	1	5	0	CHEF
chr2	75062436	75062836	chr6	82772086	82774086	200021007	16.1609	5.73449	1	1	1	1	1	0	0	0	1	6	1	0	0	0	0	0	1	2	0	CHEF
chr3	185815211	185816020	chr16	22427982	22429982	400028535	15.9211	1.52052	0	1	0	0	0	1	0	0	0	2	1	0	1	0	1	0	1	4	0	CHEF
chr12	116864966	116865443	chr5	118435855	118437855	500010063	15.7927	4.84698	1	1	1	1	0	0	1	0	0	5	1	1	1	0	1	0	1	5	0	CHEF
chr16	51145661	51146106	chr8	89002686	89004686	200015339	15.7486	1.12935	1	1	1	1	0	1	1	1	1	8	1	0	1	0	0	0	0	2	0	CHEF
chr5	94775575	94776232	chr3	88575811	88577811	500032946	15.7343	3.50408	0	0	0	0	0	0	0	0	0	0	1	1	1	0	1	0	1	5	0	CHEF
chr3	32910994	32911596	chr9	114527155	114529155	500026116	15.6222	6.47787	0	0	1	0	1	0	0	0	0	2	1	1	1	0	1	0	1	5	0	CHEF
chr2	173245277	173246135	chr2	71744528	71746528	500022425	15.4936	5.97833	1	1	0	1	0	0	0	0	0	3	1	1	1	0	1	0	1	5	0	CHEF
chr2	39743497	39743988	chr17	80800393	80802393	200020391	15.483	2.83665	0	1	1	1	1	1	1	0	0	6	0	0	1	0	0	0	1	2	0	CHEF
chr1	39607519	39608049	chr4	123623682	123625682	400000837	15.4781	3.06	1	1	1	1	0	0	1	0	1	6	0	1	1	0	1	0	1	4	0	CHEF
chr5	73729033	73729531	chr13	97435010	97437010	500032572	15.2278	1.62365	0	0	0	1	0	0	0	0	0	1	0	1	1	1	1	0	1	5	0	CHEF
chr6	74289710	74290676	chr9	78526066	78528066	400035887	15.2253	7.49746	0	0	1	0	1	0	0	0	0	2	0	1	1	0	1	0	1	4	0	CHEF
chr2	121497853	121498357	chr1	119048240	119050240	300021684	15.1215	5.38072	1	1	1	0	0	0	1	0	1	5	0	0	1	0	1	0	1	3	0	CHEF
chr8	30254744	30255480	chr8	33915336	33917336	500040458	15.0615	6.89971	1	1	1	0	1	1	0	0	0	5	1	1	1	0	1	0	1	5	0	CHEF
chrX	68483916	68484412	chrX	99556040	99558040	600044644	15.055	1.60523	1	1	1	0	0	0	1	0	0	4	1	1	1	0	1	1	1	6	0	CHEF
chr3	177077590	177078092	chr3	21935131	21937131	500028365	14.9642	4.98566	0	0	1	0	1	0	0	0	0	2	1	1	1	0	1	0	1	5	0	CHEF
chr17	79367528	79368110	chr11	120230578	120232578	600017451	14.9095	2.42512	0	1	1	0	1	0	0	0	1	4	0	1	1	1	1	1	1	6	0	CHEF
chr1	26745350	26745938	chr4	134010866	134012866	400000587	14.706	5.57516	0	1	0	0	1	0	0	0	1	3	1	0	1	0	1	0	1	4	0	CHEF
chr1	145455070	145455886	chr3	96575912	96577912	400002228	14.7014	3.79886	0	0	1	1	0	0	0	0	0	2	0	0	1	1	1	0	1	4	0	CHEF
chr15	38364690	38365289	chr2	116974614	116976614	500013471	14.658	1.98141	0	0	1	0	1	0	0	0	1	3	1	0	1	0	1	1	1	5	0	CHEF
chr3	134124961	134125449	chr9	102689648	102691648	400027669	14.6003	2.50991	1	1	1	1	1	0	0	0	1	6	1	0	1	0	1	0	1	4	0	CHEF
chr17	4299348	4299957	chr11	72575879	72577879	500016052	14.5823	6.14719	1	1	1	0	0	0	0	0	0	3	1	1	1	0	1	0	1	5	0	CHEF
chr16	85361831	85362294	chr8	120334077	120336077	400015882	14.5748	4.59747	0	1	1	1	0	0	0	0	1	4	0	1	1	0	1	0	1	4	0	CHEF
chr4	106102240	106102869	chr3	133522628	133524628	400030299	14.5566	0.820958	0	0	0	1	0	0	0	0	0	1	0	1	1	0	1	0	1	4	0	CHEF
chr1	205413921	205414402	chr1	132200065	132202065	500003314	14.436	4.98566	1	1	1	1	1	1	0	0	0	6	0	1	1	0	1	1	1	5	0	CHEF
chr9	131127032	131127638	chr2	29819551	29821551	500043853	14.4171	2.51258	1	1	1	1	1	1	0	0	1	7	1	1	1	0	0	1	1	5	0	CHEF
chrX	40704332	40704922	chrX	12838908	12840908	300044443	14.4115	6.84699	1	1	1	0	1	0	0	0	1	5	1	0	1	0	1	0	0	3	0	CHEF
chr2	16243925	16244362	chr12	12786317	12788317	100020027	14.3228	7.18116	1	1	1	0	1	1	0	0	0	5	0	0	0	0	1	0	0	1	0	CHEF
chr2	37882088	37882640	chr17	79342621	79344621	400020347	14.2665	2.05069	1	1	1	0	0	0	0	0	0	3	1	0	1	0	1	0	1	4	0	CHEF
chr18	52776992	52777520	chr18	69781787	69783787	400018277	14.07	0.911178	1	1	1	1	0	1	0	0	0	5	1	1	1	0	1	0	0	4	0	CHEF
chr3	42066938	42067543	chr9	121313257	121315257	300026263	14.0584	5.42256	0	1	1	0	0	1	0	0	0	3	0	1	1	0	1	0	0	3	0	CHEF
chr2	208630333	208630803	chr1	64732662	64734662	200022994	14.006	4.42785	1	1	1	1	0	1	0	0	0	5	1	0	1	0	0	0	0	2	0	CHEF
chr1	226086987	226087505	chr1	180923891	180925891	500003676	13.9761	4.0491	1	1	1	1	0	1	0	0	0	5	1	1	1	0	1	0	1	5	0	CHEF
chr15	37045231	37045872	chr2	115722712	115724712	400013450	13.843	3.1262	1	1	1	0	0	0	0	0	1	4	1	0	1	0	1	0	1	4	0	CHEF
chr2	173415994	173416394	chr2	71865981	71867981	200022430	13.791	2.89634	0	1	1	1	0	0	1	0	1	5	1	0	0	0	0	0	1	2	0	CHEF
chr9	75295396	75296171	chr19	20922868	20924868	500042939	13.7159	7.56059	1	1	1	1	0	0	0	0	0	4	1	1	1	0	1	0	1	5	0	CHEF
chr12	47616906	47617606	chr15	97376105	97378105	300008934	13.7052	6.35479	1	1	1	0	0	0	0	0	1	4	1	0	1	0	1	0	0	3	0	CHEF
chr6	21740985	21741908	chr13	28810063	28812063	300034899	13.6945	7.16681	1	1	1	0	0	0	0	0	0	3	1	0	1	0	1	0	0	3	0	CHEF
chr1	82013025	82013616	chr3	149219054	149221054	500001543	13.6739	5.23899	1	1	1	0	0	0	0	0	0	3	1	1	1	0	1	0	1	5	0	CHEF
chr17	57914785	57915443	chr11	86586129	86588129	300017067	13.6018	6.06541	0	0	0	0	0	0	0	0	1	1	0	0	1	0	1	0	1	3	0	CHEF
chr17	16189192	16189649	chr11	62493897	62495897	200016265	13.5873	1.55906	1	0	1	1	0	0	1	0	0	4	1	0	1	0	0	0	0	2	0	CHEF
chr10	24658332	24658935	chr2	20652249	20654249	500004454	13.5864	2.54266	1	1	1	0	0	0	0	0	0	3	1	1	1	0	1	0	1	5	0	CHEF
chr9	8408591	8409038	chr4	76013693	76015693	200042301	13.506	1.58093	1	1	1	0	0	0	0	0	1	4	0	0	1	0	0	0	1	2	0	CHEF
chr15	74078897	74079337	chr9	58454973	58456973	500014123	13.4753	3.9866	1	1	1	1	1	0	0	0	0	5	1	1	1	0	1	0	1	5	0	CHEF
chrX	46186989	46187847	chrX	19905985	19907985	500044491	13.4331	4.56529	1	1	1	1	0	0	0	0	0	4	1	1	1	0	1	0	1	5	0	CHEF
chr1	203965196	203966443	chr1	133491766	133493766	500003271	13.4297	2.62988	0	1	1	0	1	1	0	0	1	5	0	1	1	0	1	1	1	5	0	CHEF
chr3	62869666	62870235	chr14	12837141	12839141	500026622	13.4122	5.89304	1	1	1	0	0	0	0	0	0	3	1	1	1	0	1	0	1	5	0	CHEF
chr3	65582654	65583393	chr6	93911861	93913861	400026689	13.3773	6.10232	1	1	1	0	0	0	0	0	0	3	0	1	1	0	1	0	1	4	0	CHEF
chr2	16244861	16245242	chr12	12785634	12787634	100020028	13.361	7.41292	1	1	1	0	0	0	0	0	0	3	0	0	0	0	1	0	0	1	0	CHEF
chr2	208629072	208629263	chr1	64731411	64733411	100022993	13.1714	2.05582	1	1	1	1	0	0	0	1	1	6	0	0	0	0	0	0	1	1	0	CHEF
chr7	74041909	74042363	chr5	134339413	134341413	500038640	13.0976	2.94865	0	1	1	1	0	0	0	0	0	3	1	1	0	0	1	1	1	5	0	CHEF
chr6	37108897	37110226	chr17	29466665	29468665	500035414	13.0825	8.53281	1	1	1	0	0	0	0	0	1	4	1	1	1	0	1	0	1	5	0	CHEF
chr11	9634555	9635048	chr7	110163183	110165183	300006291	13.0438	3.55552	0	1	1	0	0	0	0	0	0	2	0	1	1	0	1	0	0	3	0	CHEF
chr4	165787811	165788690	chr8	65045796	65047796	500031178	13.0424	4.04313	0	1	0	0	1	1	0	0	0	3	1	1	1	0	1	0	1	5	0	CHEF
chr2	202860853	202861253	chr1	59448118	59450118	200022881	13.0293	3.5288	1	1	1	0	0	0	0	0	1	4	0	1	0	0	0	0	1	2	0	CHEF
chr10	65472944	65473556	chr10	66919612	66921612	500004971	12.9771	5.76656	1	1	1	1	0	0	0	0	0	4	1	1	1	0	1	0	1	5	0	CHEF
chr14	89907248	89908267	chr12	99411500	99413500	500012927	12.9618	4.95464	1	1	1	0	0	0	0	0	1	4	1	1	1	0	1	0	1	5	0	CHEF
chr6	41933294	41933820	chr17	47570858	47572858	500035507	12.9323	4.47251	1	1	1	1	0	0	0	1	0	5	1	1	1	0	1	0	1	5	0	CHEF
chr5	77143558	77144250	chr13	94705781	94707781	600032653	12.9314	0.828476	1	1	1	0	0	1	1	0	1	6	1	1	1	0	1	1	1	6	0	CHEF
chr2	58767710	58768334	chr11	26102174	26104174	300020713	12.7435	6.67124	1	1	0	0	1	1	0	0	0	4	0	0	1	0	1	0	1	3	0	CHEF
chr10	65026294	65026773	chr10	67187012	67189012	300004962	12.6408	5.71053	1	1	0	0	0	0	0	0	0	2	0	0	1	0	1	0	1	3	0	CHEF
chr1	26738950	26739578	chr4	134015813	134017813	200000586	12.6306	7.83557	0	0	1	0	0	0	0	0	0	1	0	0	1	0	1	0	0	2	0	CHEF
chr12	53610756	53611779	chr15	102242667	102244667	500009046	12.5956	3.961	1	1	0	0	0	1	0	0	0	3	1	1	1	0	1	0	1	5	0	CHEF
chr7	83324631	83325207	chr5	13981169	13983169	500038810	12.5717	2.03141	1	1	1	0	0	0	1	0	0	4	1	1	1	0	1	0	1	5	0	CHEF
chr9	107900578	107901072	chr4	53336839	53338839	400043435	12.4824	4.11284	0	0	0	0	0	0	0	0	0	0	1	0	1	0	1	0	1	4	0	CHEF
chr20	45997762	45998317	chr2	165898148	165900148	500024239	12.457	6.93984	1	1	1	0	0	0	0	0	0	3	1	1	1	0	1	0	1	5	0	CHEF
chr8	119086397	119087113	chr15	53310255	53312255	400041747	12.4542	4.62831	0	0	1	0	1	0	0	0	0	2	1	0	1	0	1	0	1	4	0	CHEF
chr8	94229678	94230144	chr4	12662384	12664384	500041396	12.4162	3.89753	1	1	1	0	0	0	0	0	0	3	1	1	1	0	1	0	1	5	0	CHEF
chr3	192634572	192635004	chr16	28927929	28929929	200028658	12.388	5.54708	1	0	1	0	1	0	0	0	1	4	0	0	1	0	0	0	1	2	0	CHEF
chr11	27465255	27465813	chr2	109942307	109944307	500006556	12.3583	4.58983	1	1	1	0	0	0	1	0	0	4	1	1	1	0	1	0	1	5	0	CHEF
chr11	19839375	19839992	chr7	49347076	49349076	300006472	12.3523	7.44658	1	1	1	0	0	0	0	0	0	3	1	0	1	0	1	0	0	3	0	CHEF
chr3	194004520	194004970	chr16	30205219	30207219	400028691	12.329	2.83587	1	1	1	1	0	0	0	0	0	4	0	1	1	0	1	0	1	4	0	CHEF
chr8	94228683	94229370	chr4	12662935	12664935	500041395	12.3125	5.20746	1	1	1	0	0	0	0	0	0	3	1	1	1	0	1	0	1	5	0	CHEF
chr5	36619080	36619542	chr15	8697157	8699157	200032083	12.2233	4.16871	1	1	0	0	0	0	0	0	1	3	0	0	1	0	1	0	0	2	0	CHEF
chr15	96454018	96454437	chr7	70788098	70790098	200014520	12.1988	2.03893	1	1	1	0	1	0	0	0	1	5	0	0	1	0	0	0	1	2	0	CHEF
chr11	19838595	19839148	chr7	49346309	49348309	300006471	12.1016	7.43255	1	1	1	0	0	0	0	0	0	3	0	0	1	0	1	0	1	3	0	CHEF
chr4	76630248	76630925	chr5	92111865	92113865	400029824	12.0739	7.89248	1	1	1	1	1	1	1	0	0	7	1	1	1	0	1	0	0	4	0	CHEF
chr7	47510198	47510673	chr11	8568424	8570424	400038314	12.0447	1.9388	1	1	1	1	0	1	0	1	1	7	0	1	1	0	1	0	1	4	0	CHEF
chr3	113873078	113873710	chr16	43799463	43801463	500027348	11.9594	5.28931	1	1	1	1	0	0	0	0	0	4	1	1	1	0	1	0	1	5	0	CHEF
chr6	135571954	135572883	chr10	21100991	21102991	500036859	11.9571	5.26361	1	1	1	1	0	0	0	0	0	4	1	1	1	0	1	0	1	5	0	CHEF
chr2	16098260	16098936	chr12	12926434	12928434	400020024	11.9152	4.88017	1	1	1	0	0	0	0	0	0	3	1	0	1	0	1	0	1	4	0	CHEF
chr2	206628628	206629219	chr1	62782814	62784814	500022953	11.9114	2.1815	1	1	1	0	1	0	0	0	0	4	1	1	1	0	1	0	1	5	0	CHEF
chr6	134503701	134504101	chr10	21987753	21989753	200036843	11.8079	2.39229	1	1	1	1	0	0	1	0	0	5	1	0	0	0	1	0	0	2	0	CHEF
chr11	12705770	12706725	chr7	112687476	112689476	300006345	11.8021	1.07209	1	1	1	1	0	0	1	1	0	6	0	0	1	0	0	1	1	3	0	CHEF
chr1	36351527	36352034	chr4	126465020	126467020	500000769	11.7852	3.81867	1	1	1	0	0	1	0	0	1	5	1	1	1	0	1	0	1	5	0	CHEF
chr5	101630940	101631512	chr1	96870360	96872360	400033040	11.6157	2.92481	0	0	0	0	0	0	0	0	0	0	0	1	1	0	1	0	1	4	0	CHEF
chr2	206613450	206613850	chr1	62766917	62768917	100022952	11.5681	2.87766	1	1	1	1	0	1	1	0	0	6	0	0	1	0	0	0	0	1	0	CHEF
chr7	27035185	27035659	chr6	52105351	52107351	400037938	11.5676	0.783227	1	1	1	0	0	0	0	0	0	3	1	0	1	0	1	0	1	4	0	CHEF
chrX	132783601	132784085	chrX	52347944	52349944	400045156	11.5105	2.90169	1	1	1	0	0	0	0	0	0	3	0	1	1	0	1	0	1	4	0	CHEF
chr19	18403715	18404027	chr8	70691113	70693113	100019056	11.4702	8.29728	0	1	1	0	0	0	0	0	0	2	0	0	0	0	1	0	0	1	0	CHEF
chr2	85482862	85483748	chr6	72676592	72678592	200021146	11.4274	4.30947	1	1	1	0	0	0	0	0	0	3	0	0	1	0	1	0	0	2	0	CHEF
chr2	58766871	58767575	chr11	26102968	26104968	400020712	11.4011	6.68015	1	1	1	0	1	1	0	0	0	5	1	1	1	0	1	0	0	4	0	CHEF
chr18	56514430	56515409	chr18	65564686	65566686	700018347	11.3887	7.96836	1	0	1	0	0	1	0	0	0	3	1	1	1	1	1	1	1	7	0	CHEF
chr12	54958394	54959051	chr15	103517251	103519251	500009082	11.3147	2.57391	1	0	0	0	0	0	0	0	0	1	1	1	1	0	1	0	1	5	0	CHEF
chr18	3553918	3554651	chr17	70771514	70773514	300017552	11.2707	3.2164	1	1	1	0	0	0	0	0	0	3	0	0	1	0	1	0	1	3	0	CHEF
chr20	55311334	55311833	chr2	172612991	172614991	500024390	11.256	2.22039	0	1	1	1	0	0	0	0	1	4	1	1	1	0	1	0	1	5	0	CHEF
chr1	63770205	63771174	chr4	99640667	99642667	500001250	11.2557	6.03117	1	1	1	0	0	0	1	0	0	4	1	1	1	0	1	0	1	5	0	CHEF
chr1	160951277	160951756	chr1	171477205	171479205	400002599	11.2439	4.08228	0	0	1	0	1	1	0	0	1	4	1	1	0	0	1	0	1	4	0	CHEF
chr2	62692996	62693460	chr11	22609697	22611697	400020780	11.1935	3.79783	0	0	0	1	0	0	0	0	1	2	1	1	1	0	0	0	1	4	0	CHEF
chr17	16341797	16342574	chr11	62601588	62603588	400016272	11.0369	5.21196	0	0	1	0	1	0	0	0	0	2	0	1	1	0	1	0	1	4	0	CHEF
chr11	12885809	12886740	chr7	112840905	112842905	600006354	10.8876	8.28065	1	1	0	0	0	0	0	0	1	3	1	1	1	0	1	1	1	6	0	CHEF
chr13	80871277	80871767	chr14	105860123	105862123	500011303	10.8754	4.65744	1	1	1	1	1	1	1	0	0	7	1	1	1	0	1	0	1	5	0	CHEF
chr1	39568391	39568909	chr4	123666325	123668325	500000834	10.8572	3.8529	1	1	0	0	0	0	0	0	0	2	1	1	1	0	1	0	1	5	0	CHEF
chr11	129090319	129090719	chr9	32095377	32097377	100008124	10.8275	1.70307	1	1	1	0	0	0	1	0	1	5	1	0	0	0	0	0	0	1	0	CHEF
chr2	206948316	206949317	chr1	63111602	63113602	400022959	10.7892	8.74105	0	0	0	0	0	0	0	0	1	1	1	1	1	0	1	0	0	4	0	CHEF
chr8	38297642	38298644	chr8	25544220	25546220	500040588	10.7688	8.71682	1	1	1	0	0	0	0	0	0	3	1	1	1	0	1	0	1	5	0	CHEF
chr8	40935268	40935792	chr8	23561134	23563134	500040628	10.746	6.01796	1	1	1	0	0	0	0	0	0	3	1	1	1	0	1	0	1	5	0	CHEF
chr17	76361668	76362195	chr11	117974674	117976674	400017393	10.7139	6.05734	1	1	1	1	0	1	1	1	0	7	0	1	1	0	1	0	1	4	0	CHEF
chr20	50428051	50428529	chr2	168776074	168778074	400024312	10.7123	3.3047	0	0	0	0	0	0	0	0	0	0	0	1	1	0	1	0	1	4	0	CHEF
chr2	144649287	144650078	chr2	44524559	44526559	500021944	10.6738	1.8654	1	1	1	1	0	0	0	0	0	4	1	1	1	0	1	0	1	5	0	CHEF
chr17	42617029	42617541	chr11	102578519	102580519	700016764	10.6625	1.91729	1	0	0	1	0	0	0	0	0	2	1	1	1	1	1	1	1	7	0	CHEF
chr2	158788648	158789835	chr2	58625433	58627433	500022167	10.5838	2.03893	1	1	1	1	0	0	0	0	0	4	1	1	1	0	1	0	1	5	0	CHEF
chr7	140155423	140155912	chr6	39399487	39401487	400039720	10.5597	4.15268	1	1	0	0	0	1	0	0	0	3	1	1	1	0	1	0	0	4	0	CHEF
chr7	137928207	137928673	chr6	37657379	37659379	500039683	10.555	7.95082	1	1	1	1	0	0	0	0	0	4	1	1	1	0	1	0	1	5	0	CHEF
chr19	36207660	36208514	chr7	30588530	30590530	300019282	10.5405	6.57429	0	1	1	0	1	0	0	0	0	3	1	0	1	0	1	0	0	3	0	CHEF
chr7	70193699	70194178	chr5	131491374	131493374	400038575	10.4952	3.27194	0	0	0	0	0	0	0	0	0	0	1	0	1	0	1	0	1	4	0	CHEF
chr10	95609109	95609895	chr19	38347470	38349470	500005483	10.4247	1.83593	1	1	1	1	0	0	0	0	0	4	1	1	1	0	1	0	1	5	0	CHEF
chr3	122705485	122705949	chr16	35587165	35589165	400027477	10.3905	3.31348	1	1	0	1	0	1	0	0	0	4	1	0	1	0	1	0	1	4	0	CHEF
chr7	13056632	13057407	chr12	39740690	39742690	400037691	10.3427	2.11956	0	1	1	0	0	0	1	0	0	3	0	1	1	0	1	0	1	4	0	CHEF
chr2	153309628	153310430	chr2	52958577	52960577	400022085	10.3188	3.74931	0	0	0	0	0	0	0	0	1	1	0	1	1	0	1	0	1	4	0	CHEF
chr1	155165919	155166368	chr3	89225087	89227087	300002482	10.3026	6.51285	1	1	0	0	0	0	0	0	1	3	1	1	0	0	0	0	1	3	0	CHEF
chr8	38299884	38300465	chr8	25542526	25544526	300040589	10.3018	6.59772	1	0	1	0	1	0	0	0	0	3	0	0	1	0	1	0	1	3	0	CHEF
chr8	20091995	20092681	chr8	69120867	69122867	300040293	10.2746	1.43854	1	0	1	0	0	0	0	0	0	2	1	0	1	0	0	0	1	3	0	CHEF
chr3	57164678	57165282	chr14	27065524	27067524	400026518	10.2329	6.12405	0	1	1	0	0	0	0	0	0	2	0	1	1	0	1	0	1	4	0	CHEF
chr2	171292709	171293332	chr2	70278171	70280171	300022370	10.2234	2.13045	1	1	1	1	0	0	0	1	0	5	0	0	1	0	1	0	1	3	0	CHEF
chr18	63278050	63278642	chr1	109800506	109802506	500018454	10.0961	1.13884	0	0	0	0	0	0	0	0	0	0	1	1	1	0	1	0	1	5	0	CHEF
chr14	24008170	24008317	chr14	55077844	55079844	100011874	9.99212	9.10617	1	0	0	0	0	0	0	0	0	1	0	0	0	0	0	0	1	1	0	CHEF
chr19	47660502	47661238	chr7	16364227	16366227	500019523	9.94049	5.98674	1	1	1	1	0	0	0	0	0	4	1	1	1	0	1	0	1	5	0	CHEF
chr9	84236099	84236535	chr4	72145192	72147192	300043073	9.90801	2.2251	1	1	1	0	0	0	0	0	0	3	1	0	1	0	0	0	1	3	0	CHEF
chr3	27574572	27575837	chr14	14631972	14633972	500026007	9.88189	3.81113	1	1	1	0	0	0	0	0	0	3	1	1	1	0	1	0	1	5	0	CHEF
chr11	69586230	69586692	chr7	144863375	144865375	300007193	9.86807	3.8798	1	1	1	1	0	1	0	0	0	5	0	0	1	0	1	0	1	3	0	CHEF
chr10	3825966	3826478	chr13	5861824	5863824	400004104	9.86262	3.68576	0	0	0	0	0	0	0	0	0	0	0	1	1	0	1	0	1	4	0	CHEF
chr2	43672361	43672774	chr17	84350367	84352367	200020453	9.83134	1.92393	1	1	1	1	0	1	1	0	0	6	0	0	1	0	1	0	0	2	0	CHEF
chr20	21081470	21081918	chr2	146833536	146835536	500023879	9.80817	2.34526	1	1	1	1	1	0	0	0	0	5	1	1	1	0	1	0	1	5	0	CHEF
chr20	57227240	57227743	chr2	174076507	174078507	500024422	9.78769	7.89332	0	0	0	0	0	0	0	0	0	0	1	1	1	0	1	0	1	5	0	CHEF
chr3	181448712	181449112	chr3	34667638	34669638	100028443	9.78129	2.22251	1	1	1	1	0	0	1	0	0	5	0	0	1	0	0	0	0	1	0	CHEF
chr4	187608782	187610027	chr8	44970572	44972572	500031529	9.72786	3.70573	1	1	1	0	0	0	1	0	0	4	1	1	1	0	1	0	1	5	0	CHEF
chr6	144978774	144979292	chr10	12549232	12551232	400037049	9.7238	3.58427	1	1	0	1	0	0	0	0	1	4	1	0	1	0	1	0	1	4	0	CHEF
chr7	26988042	26989336	chr6	52077858	52079858	500037937	9.55406	4.28113	1	1	1	1	0	0	0	0	0	4	1	1	1	0	1	0	1	5	0	CHEF
chr6	121759222	121759806	chr10	56378825	56380825	500036618	9.51752	6.01845	0	0	0	0	0	0	0	0	0	0	1	1	1	0	1	0	1	5	0	CHEF
chr9	108673808	108674329	chr4	53951502	53953502	300043452	9.41479	5.05378	0	1	0	1	0	0	0	0	0	2	0	0	1	0	1	0	1	3	0	CHEF
chr9	131145312	131145794	chr2	29834701	29836701	500043854	9.4009	3.36991	1	1	1	0	1	0	0	0	0	4	1	1	1	0	1	0	1	5	0	CHEF
chr4	38668406	38669155	chr5	64805174	64807174	400029357	9.38567	3.3859	0	1	0	0	0	0	0	0	1	2	1	0	1	0	1	1	0	4	0	CHEF
chr8	128879344	128879916	chr15	62091960	62093960	500041923	9.30465	4.4158	1	1	1	1	1	0	1	0	1	7	1	1	1	0	1	0	1	5	0	CHEF
chr13	80933644	80934318	chr14	105919922	105921922	500011305	9.29267	3.887	1	1	1	0	0	0	0	0	1	4	1	1	1	0	1	0	1	5	0	CHEF
chr9	92292694	92293579	chr13	51919883	51921883	500043204	9.2915	4.80211	1	1	1	1	0	0	0	0	0	4	1	1	1	0	1	0	1	5	0	CHEF
chr4	80004524	80005017	chr5	97217898	97219898	400029892	9.22649	0.906095	1	1	1	0	0	0	0	0	0	3	1	0	1	0	1	0	1	4	0	CHEF
chr2	42772572	42773629	chr17	83663722	83665722	500020430	9.11532	8.3844	1	1	1	1	0	0	0	0	0	4	1	1	1	0	1	0	1	5	0	CHEF
chr8	103548007	103548783	chr15	38197803	38199803	500041545	9.04845	5.62759	0	0	0	0	0	0	0	0	0	0	1	1	1	0	1	0	1	5	0	CHEF
chr14	36738497	36739143	chr12	56297674	56299674	500012047	9.04254	1.68672	1	1	1	0	0	0	0	0	0	3	1	1	1	0	1	0	1	5	0	CHEF
chr19	54931465	54932414	chr7	4123115	4125115	200019729	9.03539	4.15513	1	1	0	0	0	1	0	0	0	3	1	0	0	0	1	0	0	2	0	CHEF
chr11	79878690	79879090	chr7	95479295	95481295	200007366	9.00293	1.29522	1	1	1	0	0	0	0	0	0	3	1	0	0	0	1	0	0	2	0	CHEF
chr12	98884778	98885236	chr10	91187016	91189016	400009759	8.94904	2.6827	0	1	0	0	0	0	0	0	0	1	0	1	1	0	1	0	1	4	0	CHEF
chr11	20048530	20049265	chr7	49526626	49528626	600006478	8.93132	2.52667	0	1	0	0	0	0	0	0	0	1	1	1	1	0	1	1	1	6	0	CHEF
chr2	65664919	65665369	chr11	19917121	19919121	500020857	8.91823	1.65385	1	1	1	1	0	0	0	0	0	4	1	1	1	0	1	0	1	5	0	CHEF
chr15	26480447	26480955	chr7	58224981	58226981	400013266	8.89169	3.99699	1	1	1	1	0	0	0	0	0	4	1	0	1	0	1	0	1	4	0	CHEF
chr12	46125136	46125604	chr15	96288442	96290442	400008911	8.81733	4.70485	0	0	0	0	0	0	0	0	0	0	0	1	1	0	1	0	1	4	0	CHEF
chr1	204077623	204078319	chr1	133396831	133398831	500003275	8.8151	4.57291	1	1	1	0	1	0	0	0	1	5	1	1	1	0	1	0	1	5	0	CHEF
chr6	14380626	14382176	chr13	44017854	44019854	500034758	8.80697	6.68997	1	1	1	0	0	0	0	0	0	3	1	1	1	0	1	0	1	5	0	CHEF
chr19	47730611	47731386	chr7	16311761	16313761	600019525	8.77699	5.49367	0	0	0	0	0	0	0	0	0	0	1	1	1	0	1	1	1	6	0	CHEF
chrX	95020143	95020622	chrX	128575681	128577681	400044832	8.77255	1.60722	1	1	0	0	0	0	0	0	0	2	1	1	1	0	1	0	0	4	0	CHEF
chr16	54685194	54685857	chr8	92133226	92135226	400015407	8.76327	2.15871	1	1	1	0	0	0	0	0	0	3	1	1	1	0	1	0	0	4	0	CHEF
chr9	38017069	38017558	chr4	45489188	45491188	500042732	8.73564	4.70123	1	1	1	0	0	1	0	0	0	4	1	1	1	0	1	0	1	5	0	CHEF
chr1	205417558	205418140	chr1	132196885	132198885	400003315	8.70238	2.77442	1	1	0	0	0	0	0	0	0	2	0	0	1	1	1	0	1	4	0	CHEF
chr20	280860	281348	chr2	152410930	152412930	400023550	8.6976	2.47499	0	0	0	0	0	0	0	0	0	0	1	1	1	0	1	0	0	4	0	CHEF
chr20	52380361	52380930	chr2	170244682	170246682	500024346	8.69131	3.71691	1	1	0	0	0	0	0	0	0	2	1	1	1	0	1	0	1	5	0	CHEF
chr14	59092166	59092574	chr12	71295526	71297526	300012395	8.68045	3.46291	1	1	1	1	0	0	1	1	0	6	0	0	1	0	1	0	1	3	0	CHEF
chr1	116034923	116035402	chr1	133396774	133398774	200002056	8.65389	1.03728	1	1	1	0	1	0	0	0	1	5	0	0	1	0	0	0	1	2	0	CHEF
chr4	154457265	154457749	chr3	83979427	83981427	400031027	8.64754	2.87186	1	1	1	0	0	0	0	0	0	3	1	0	1	0	1	0	1	4	0	CHEF
chr20	34685675	34686086	chr2	156424753	156426753	300024068	8.62768	0.879677	1	1	0	0	0	0	0	0	0	2	1	0	1	0	0	0	1	3	0	CHEF
chr20	30300418	30300906	chr2	152819624	152821624	400023992	8.61711	3.77412	0	1	0	1	1	0	0	0	0	3	0	1	1	0	1	0	1	4	0	CHEF
chr8	128867244	128867778	chr15	62079360	62081360	400041922	8.60223	5.53223	0	0	0	0	0	0	0	0	1	1	0	1	1	0	1	0	1	4	0	CHEF
chr9	127531285	127532291	chr2	38924014	38926014	300043767	8.60169	1.25859	1	1	1	0	0	0	0	0	0	3	1	0	1	0	0	0	1	3	0	CHEF
chr15	57529361	57529830	chr9	71878659	71880659	400013765	8.52553	1.56277	1	1	1	0	0	0	0	0	0	3	0	1	1	0	1	0	1	4	0	CHEF
chr20	30704336	30704736	chr2	153167204	153169204	100024004	8.46694	1.83409	1	1	1	1	1	1	1	0	0	7	0	0	1	0	0	0	0	1	0	CHEF
chr11	85252707	85253292	chr7	90538713	90540713	400007439	8.4591	3.52757	1	1	1	0	0	0	0	0	0	3	1	1	1	0	1	0	0	4	0	CHEF
chr14	59093205	59093562	chr12	71296590	71298590	100012396	8.42685	3.46863	1	1	1	1	1	0	1	1	0	7	0	0	0	0	1	0	0	1	0	CHEF
chr1	202070841	202071241	chr1	135185125	135187125	100003233	8.42232	2.5445	1	0	1	1	0	0	1	0	0	4	0	1	0	0	0	0	0	1	0	CHEF
chr6	90192769	90193419	chr4	32922591	32924591	500036102	8.31806	1.9562	1	1	0	0	0	0	0	0	0	2	1	1	1	1	1	0	0	5	0	CHEF
chrX	133315164	133315674	chrX	52752579	52754579	400045166	8.30278	1.59914	1	1	1	0	0	0	0	0	0	3	1	0	1	0	1	0	1	4	0	CHEF
chr18	46485982	46487115	chr18	75360273	75362273	500018199	8.30166	5.84482	1	1	1	1	0	0	0	1	1	6	1	1	1	0	1	0	1	5	0	CHEF
chr12	8112280	8112800	chr6	122759638	122761638	500008362	8.26794	3.1018	0	0	0	0	0	0	0	0	0	0	1	1	1	0	1	0	1	5	0	CHEF
chr4	184799674	184800163	chr8	47319958	47321958	500031455	8.25365	0.967915	0	1	0	0	0	0	0	0	1	2	1	1	1	0	1	0	1	5	0	CHEF
chr17	40164345	40164775	chr11	100614870	100616870	300016695	8.2247	2.52667	1	1	0	1	0	0	0	0	0	3	1	0	1	0	0	0	1	3	0	CHEF
chr10	111693970	111695371	chr19	53051099	53053099	400005740	8.22353	3.33216	1	0	1	1	0	0	0	0	0	3	1	0	1	0	1	0	1	4	0	CHEF
chr13	43167105	43168003	chr14	78288256	78290256	400010748	8.20249	4.3245	1	1	1	0	0	0	1	0	1	5	1	1	1	0	1	0	0	4	0	CHEF
chr13	100339059	100339668	chr14	122254708	122256708	400011543	8.19815	4.15707	1	1	1	0	0	0	0	0	0	3	1	0	1	0	1	0	1	4	0	CHEF
chr1	63760321	63760839	chr4	99635842	99637842	500001248	8.17116	7.23632	1	1	1	0	0	1	1	0	0	5	1	1	1	0	1	0	1	5	0	CHEF
chr11	27466280	27466845	chr2	109941276	109943276	500006557	8.14461	4.598	1	1	1	0	0	0	0	0	0	3	1	1	1	0	1	0	1	5	0	CHEF
chr12	11761840	11762453	chr6	133985932	133987932	500008418	8.08855	5.80562	1	1	1	0	0	0	0	0	0	3	1	1	1	0	1	0	1	5	0	CHEF
chr4	124426726	124427201	chr14	105850531	105852531	500030597	8.075	4.24207	0	1	0	0	0	0	0	0	0	1	1	1	1	0	1	0	1	5	0	CHEF
chr20	53142727	53143141	chr2	170771462	170773462	200024371	8.0698	1.46266	1	1	1	1	0	0	1	0	1	6	0	0	0	0	1	0	1	2	0	CHEF
chr9	108781901	108782447	chr4	54072101	54074101	200043457	8.06838	4.20976	1	1	0	0	0	0	0	0	0	2	1	1	0	0	0	0	0	2	0	CHEF
chr22	17860560	17861374	chr6	120676020	120678020	400025031	8.0547	4.39286	0	1	1	0	0	0	0	0	0	2	0	1	1	0	1	0	1	4	0	CHEF
chr9	98274550	98275060	chr13	63568295	63570295	300043300	8.0477	2.84926	1	0	1	0	0	0	0	0	0	2	0	0	1	0	1	0	1	3	0	CHEF
chr8	30251378	30251810	chr8	33919099	33921099	300040457	7.94796	7.36451	0	0	0	0	0	0	0	0	0	0	0	0	1	0	1	0	1	3	0	CHEF
chr15	65100905	65101390	chr9	65605076	65607076	400013917	7.94225	8.75358	0	0	0	1	0	0	0	0	0	1	1	0	1	0	1	0	1	4	0	CHEF
chr14	69258117	69258573	chr12	80110601	80112601	300012593	7.93968	3.29226	0	1	0	0	0	0	0	1	0	2	0	1	1	0	0	0	1	3	0	CHEF
chr18	47139314	47140133	chr18	74906511	74908511	500018212	7.92746	2.15817	1	0	0	0	0	0	0	0	0	1	1	1	1	1	1	0	0	5	0	CHEF
chr12	24383003	24383469	chr6	144453532	144455532	400008602	7.91317	1.60462	0	1	1	0	0	0	1	1	1	5	0	1	1	0	1	0	1	4	0	CHEF
chr12	8845235	8845554	chr6	122490778	122492778	300008383	7.88848	4.31698	1	1	1	0	0	0	0	0	1	4	0	0	0	0	1	1	1	3	0	CHEF
chr17	738529	739037	chr11	76285633	76287633	400015984	7.87265	1.90883	0	1	0	0	0	0	0	0	0	1	1	0	1	0	1	0	1	4	0	CHEF
chr7	73157019	73157662	chr5	135000474	135002474	300038623	7.86981	2.76774	0	1	1	1	1	0	0	0	0	4	0	1	1	0	1	0	0	3	0	CHEF
chr3	78556303	78556796	chr16	73096074	73098074	200026910	7.86404	1.40803	1	1	1	0	1	0	1	0	1	6	0	0	1	0	0	0	1	2	0	CHEF
chr10	74804574	74805033	chr10	59353336	59355336	200005123	7.82624	3.52713	1	1	1	0	0	0	0	0	0	3	0	0	1	0	1	0	0	2	0	CHEF
chr22	36764654	36765064	chr15	77826526	77828526	300025347	7.80058	4.17396	1	0	0	0	0	0	0	0	1	2	0	1	1	0	0	0	1	3	0	CHEF
chr7	158494786	158495290	chr12	116405816	116407816	400039997	7.79313	2.02525	0	0	0	0	0	0	0	0	0	0	1	1	1	0	0	0	1	4	0	CHEF
chr13	59983768	59984248	chr14	86395198	86397198	500011018	7.74801	4.49503	1	1	1	0	0	0	1	0	0	4	1	1	1	0	1	0	1	5	0	CHEF
chr13	100339739	100341046	chr14	122255665	122257665	300011544	7.73934	5.19376	0	0	1	0	0	0	0	0	0	1	0	0	1	0	1	0	1	3	0	CHEF
chr2	122288045	122288900	chr1	118458403	118460403	300021696	7.72961	4.41075	0	1	1	0	0	0	0	0	1	3	0	0	1	0	1	0	1	3	0	CHEF
chr11	71751763	71752422	chr7	101969743	101971743	400007227	7.71863	4.61772	0	0	1	0	1	0	0	0	0	2	1	0	1	0	1	0	1	4	0	CHEF
chr3	134082969	134083719	chr9	102725313	102727313	300027667	7.70138	6.61978	0	0	1	0	1	0	0	0	1	3	0	0	1	0	1	0	1	3	0	CHEF
chr17	46133094	46133512	chr11	96821766	96823766	200016837	7.68906	8.27737	0	0	0	0	0	0	0	0	0	0	1	1	0	0	0	0	0	2	0	CHEF
chr5	52967203	52967829	chr13	114297050	114299050	500032258	7.67914	2.47296	0	0	1	0	0	0	0	0	1	2	1	1	1	0	1	0	1	5	0	CHEF
chr20	32156073	32156611	chr2	154465057	154467057	500024032	7.65879	1.29645	1	1	0	1	0	0	0	0	0	3	1	1	1	0	1	0	1	5	0	CHEF
chr2	170646114	170646568	chr18	84850395	84852395	500022355	7.64669	1.88128	0	0	1	0	1	1	0	0	0	3	1	1	1	0	1	0	1	5	0	CHEF
chr2	51518861	51519601	chr17	91430936	91432936	400020604	7.62744	2.85632	0	0	0	0	0	0	0	0	0	0	0	1	1	0	1	0	1	4	0	CHEF
chr8	9963064	9963493	chr14	64407463	64409463	200040144	7.60077	0.991155	1	1	1	0	1	1	0	0	1	6	0	0	1	0	1	0	0	2	0	CHEF
chr5	140940109	140940651	chr18	37879186	37881186	500033752	7.55636	3.21891	0	0	0	0	0	0	0	0	0	0	1	1	0	0	1	1	1	5	0	CHEF
chr7	75268585	75269359	chr5	135488677	135490677	600038663	7.55475	7.45731	1	0	1	0	1	0	0	0	1	4	1	1	1	1	1	1	0	6	0	CHEF
chr6	19312011	19313183	chr13	47854925	47856925	600034847	7.5188	3.72304	1	1	1	1	0	0	1	1	0	6	1	1	1	1	1	0	1	6	0	CHEF
chr16	73074081	73074529	chr8	108722136	108724136	300015687	7.51264	1.43321	1	1	1	0	0	0	0	0	0	3	1	0	1	0	0	0	1	3	0	CHEF
chr8	70889457	70890036	chr1	13073601	13075601	500041002	7.48992	5.31924	1	1	1	1	0	0	0	0	0	4	1	1	1	0	1	0	1	5	0	CHEF
chr5	123916657	123917510	chr18	54827363	54829363	500033424	7.46967	3.63282	1	1	1	0	0	0	0	0	1	4	1	1	1	0	1	0	1	5	0	CHEF
chr7	137853731	137854736	chr6	37591954	37593954	500039678	7.4572	6.04383	0	0	0	0	0	0	0	0	0	0	1	1	1	0	1	0	1	5	0	CHEF
chr12	107161667	107162723	chr10	84910199	84912199	600009891	7.45232	5.52744	1	1	1	1	0	0	1	0	0	5	1	1	1	0	1	1	1	6	0	CHEF
chr3	181425654	181426163	chr3	34645336	34647336	400028436	7.45142	6.01892	1	1	1	0	0	0	1	0	0	4	1	0	1	0	1	0	1	4	0	CHEF
chr15	76692223	76692697	chr9	55597797	55599797	500014193	7.42658	1.26006	1	1	1	0	0	0	0	0	1	4	1	1	1	0	1	0	1	5	0	CHEF
chr22	22005849	22006303	chr16	17124493	17126493	400025096	7.40864	3.70714	0	0	0	0	0	0	0	0	0	0	1	1	0	0	1	0	1	4	0	CHEF
chr17	3386106	3386579	chr11	73319504	73321504	400016038	7.39057	3.42068	0	0	0	0	0	0	0	0	0	0	1	0	1	0	1	0	1	4	0	CHEF
chr9	98516925	98517503	chr13	63719631	63721631	500043307	7.3725	2.21471	1	1	0	0	0	0	0	0	1	3	1	1	1	0	1	1	0	5	0	CHEF
chr5	98298702	98299183	chr17	15677073	15679073	500033004	7.36118	1.44289	1	1	1	1	0	0	0	0	0	4	1	1	1	0	1	0	1	5	0	CHEF
chr21	16377458	16378185	chr16	76320757	76322757	600024541	7.34741	0.90043	1	1	1	1	0	0	0	0	1	5	1	1	1	0	1	1	1	6	0	CHEF
chr2	202837491	202837999	chr1	59422420	59424420	400022880	7.30549	3.89539	1	1	1	1	0	1	1	0	1	7	1	1	1	0	1	0	0	4	0	CHEF
chr21	18886261	18886809	chr16	78301867	78303867	300024580	7.29111	7.55684	0	0	0	0	0	0	0	0	0	0	0	0	1	0	1	0	1	3	0	CHEF
chr8	54816935	54817341	chr1	4970946	4972946	200040750	7.28671	2.08982	1	1	1	1	0	0	0	0	0	4	1	0	1	0	0	0	0	2	0	CHEF
chr17	65441695	65442141	chr11	107412541	107414541	400017186	7.28058	1.79448	0	1	1	0	0	0	0	0	1	3	1	0	1	0	1	0	1	4	0	CHEF
chr18	8890850	8891324	chr17	66285625	66287625	400017660	7.27513	3.53299	0	0	0	0	0	0	0	0	0	0	1	1	1	0	1	0	0	4	0	CHEF
chr11	77168341	77168975	chr7	97803724	97805724	400007327	7.26521	3.35084	1	1	1	0	0	0	0	0	0	3	0	1	1	0	1	0	1	4	0	CHEF
chr14	97491976	97492376	chr12	106174339	106176339	100013029	7.25175	2.7852	1	1	1	1	0	1	0	0	1	6	1	0	0	0	0	0	0	1	0	CHEF
chr1	44966762	44967231	chr4	117414419	117416419	300000925	7.24807	3.16668	1	1	1	1	0	0	0	0	0	4	1	0	1	0	0	0	1	3	0	CHEF
chr16	52907855	52908346	chr8	90669948	90671948	500015379	7.24022	1.99982	1	1	1	0	0	0	0	0	0	3	1	1	1	0	1	0	1	5	0	CHEF
chr7	555376	555776	chr5	138990958	138992958	100037474	7.2334	5.5046	1	1	1	0	0	1	0	0	1	5	0	0	1	0	0	0	0	1	0	CHEF
chr12	12837439	12837930	chr6	134887025	134889025	400008440	7.23084	3.29481	1	1	0	0	0	0	0	0	0	2	1	1	1	0	0	0	1	4	0	CHEF
chr4	109115352	109115854	chr3	131083903	131085903	500030358	7.14072	0.819672	1	1	1	0	0	0	0	0	0	3	1	1	1	0	1	0	1	5	0	CHEF
chr4	165801580	165802041	chr8	65033244	65035244	200031181	7.1396	3.71691	1	1	0	0	0	0	0	0	0	2	1	0	0	0	1	0	0	2	0	CHEF
chr4	113569753	113570409	chr3	127543872	127545872	500030439	7.08229	5.7892	1	1	1	0	0	0	0	0	0	3	1	1	1	0	1	0	1	5	0	CHEF
chr16	24742174	24742627	chr7	123124523	123126523	500015112	7.03071	5.8475	0	0	0	0	0	0	0	0	0	0	1	1	1	0	1	0	1	5	0	CHEF
chr6	140209745	140210491	chr10	17229379	17231379	500036959	7.02752	4.50726	0	1	1	0	1	0	0	0	0	3	1	1	1	0	1	0	1	5	0	CHEF
chr5	96470225	96470865	chr17	17408856	17410856	400032975	6.97898	1.79635	0	0	0	0	0	0	0	0	0	0	0	1	1	0	1	0	1	4	0	CHEF
chr17	8076076	8077372	chr11	69072295	69074295	300016151	6.9747	2.92609	1	1	0	0	0	1	0	0	0	3	1	0	1	0	1	0	0	3	0	CHEF
chr16	51425986	51426555	chr8	89270796	89272796	500015352	6.97413	4.7104	1	1	1	0	0	0	0	0	1	4	1	1	1	0	1	0	1	5	0	CHEF
chr6	121751728	121752665	chr10	56372730	56374730	500036616	6.96737	7.10352	1	1	1	1	0	0	1	0	0	5	1	1	1	0	1	0	1	5	0	CHEF
chr8	54570250	54570738	chr1	5232010	5234010	300040744	6.92866	2.91857	0	1	1	0	0	0	0	0	0	2	0	0	1	0	1	0	1	3	0	CHEF
chr20	31339503	31340027	chr2	153640673	153642673	500024018	6.83273	7.37289	1	1	1	0	0	0	0	0	0	3	1	1	1	0	1	0	1	5	0	CHEF
chr11	95070649	95072691	chr9	14173403	14175403	400007588	6.83142	3.29807	1	1	1	1	1	1	0	0	1	7	1	0	1	0	1	0	1	4	0	CHEF
chr7	123771427	123771827	chr6	25032177	25034177	300039457	6.82221	0.978744	1	1	1	0	0	0	1	0	1	5	0	0	1	0	1	0	1	3	0	CHEF
chr6	105845826	105846311	chr10	45070812	45072812	400036338	6.7925	1.31717	1	1	1	0	0	0	0	0	1	4	0	1	1	0	1	0	1	4	0	CHEF
chr12	76337670	76338615	chr10	111575187	111577187	500009392	6.78263	6.50533	0	0	1	1	0	0	0	0	0	2	1	1	1	0	1	0	1	5	0	CHEF
chr7	70168715	70169217	chr5	131526005	131528005	400038572	6.77362	2.08695	1	1	1	0	0	0	0	0	0	3	1	1	1	0	0	0	1	4	0	CHEF
chr1	64240646	64241780	chr4	100096253	100098253	500001261	6.77325	6.58317	1	1	1	1	0	0	0	0	0	4	1	1	1	0	1	0	1	5	0	CHEF
chr13	112815707	112816677	chr8	12477136	12479136	300011735	6.7633	3.34852	0	1	0	1	0	0	0	0	0	2	0	1	1	0	1	0	0	3	0	CHEF
chr20	46136952	46137400	chr2	165999913	166001913	300024243	6.75395	2.32796	0	1	0	0	0	0	0	0	0	1	0	0	1	0	1	0	1	3	0	CHEF
chr18	45087336	45088016	chr18	76555524	76557524	400018177	6.73683	3.1835	1	1	1	0	0	0	0	0	0	3	1	1	1	0	0	0	1	4	0	CHEF
chr7	100293261	100293699	chr5	137508631	137510631	300039088	6.73061	5.71448	0	0	1	0	1	0	0	0	0	2	1	0	1	0	0	0	1	3	0	CHEF
chr9	74371656	74372226	chr19	21786168	21788168	500042922	6.70932	2.82785	0	0	0	0	0	0	0	0	0	0	1	1	1	0	1	0	1	5	0	CHEF
chr11	116580572	116581019	chr9	46328548	46330548	300007894	6.70609	1.64718	0	1	1	0	0	0	0	0	0	2	1	1	1	0	0	0	0	3	0	CHEF
chr20	20444547	20445046	chr2	146301499	146303499	500023868	6.70427	2.11808	1	1	1	0	0	0	0	0	1	4	1	1	1	0	1	0	1	5	0	CHEF
chr5	73567723	73568214	chr13	97579719	97581719	400032571	6.69165	1.81998	0	1	0	0	0	0	0	0	0	1	0	1	1	0	1	0	1	4	0	CHEF
chr4	87857050	87857469	chr5	103692405	103694405	300030026	6.68081	5.48069	1	0	1	0	0	0	0	0	1	3	1	1	1	0	0	0	0	3	0	CHEF
chr1	117396285	117396795	chr3	101162727	101164727	200002074	6.63584	4.29419	1	1	1	1	0	0	0	0	1	5	0	0	1	0	1	0	0	2	0	CHEF
chr9	16709855	16710374	chr4	84527603	84529603	200042430	6.63559	7.27921	1	1	1	0	0	0	0	0	0	3	1	0	0	0	1	0	0	2	0	CHEF
chr4	42427146	42427602	chr5	67632543	67634543	300029435	6.62484	2.14849	1	1	1	0	0	0	0	0	0	3	1	1	0	0	1	0	0	3	0	CHEF
chr7	70778525	70778937	chr5	131176377	131178377	200038581	6.59851	2.54347	1	1	0	0	0	0	0	0	0	2	1	0	1	0	0	0	0	2	0	CHEF
chr8	70509236	70509636	chr1	12813521	12815521	200040996	6.59578	1.49138	1	0	0	1	0	0	1	0	0	3	0	0	1	0	1	0	0	2	0	CHEF
chr18	54540961	54541458	chr18	63863415	63865415	500018310	6.58416	2.6805	1	1	1	0	0	0	0	0	0	3	1	1	1	0	1	0	1	5	0	CHEF
chr2	119565531	119566020	chr1	120643027	120645027	200021637	6.58113	2.80707	1	1	1	0	0	0	0	0	1	4	1	0	1	0	0	0	0	2	0	CHEF
chr19	14358295	14359771	chr8	83874968	83876968	600018983	6.57434	6.02487	0	0	1	0	1	0	0	0	0	2	1	1	1	0	1	1	1	6	0	CHEF
chr18	9808284	9808782	chr17	65701388	65703388	300017681	6.56838	3.09324	0	1	1	1	0	0	0	0	0	3	0	0	1	0	1	0	1	3	0	CHEF
chr2	202887865	202888892	chr1	59472014	59474014	500022882	6.5551	4.19669	1	1	1	0	1	0	0	0	1	5	1	1	1	0	1	0	1	5	0	CHEF
chr5	73892690	73893258	chr13	97283112	97285112	600032577	6.54245	1.4525	0	0	0	0	0	0	0	0	0	0	1	1	1	1	1	0	1	6	0	CHEF
chr1	28975013	28975845	chr4	132269183	132271183	400000647	6.53569	3.1235	0	1	0	0	0	1	0	0	0	2	1	0	1	0	1	0	1	4	0	CHEF
chr15	65707369	65707967	chr9	65108600	65110600	300013937	6.52762	4.01552	1	0	0	0	1	0	0	0	0	2	1	0	1	0	1	0	0	3	0	CHEF
chr18	19513837	19514410	chr18	10865244	10867244	500017772	6.4781	1.42785	1	1	1	0	0	0	0	0	1	4	1	1	1	0	1	0	1	5	0	CHEF
chr3	10268048	10268501	chr6	113681793	113683793	400025750	6.47662	3.24121	0	0	0	0	1	0	0	0	0	1	1	1	1	0	0	0	1	4	0	CHEF
chr2	235271475	235272065	chr1	88612387	88614387	400023412	6.46125	2.33214	1	0	1	0	0	0	0	0	0	2	0	1	1	0	1	0	1	4	0	CHEF
chr10	69621313	69622092	chr10	63365856	63367856	500005020	6.44752	6.34158	1	1	0	0	0	0	0	0	1	3	1	1	1	0	1	0	1	5	0	CHEF
chr1	45008730	45009351	chr4	117372685	117374685	500000929	6.42626	4.68194	1	1	1	0	1	0	0	0	1	5	1	1	1	0	1	0	1	5	0	CHEF
chr2	236995431	236995931	chr1	89869767	89871767	300023457	6.42546	3.92653	1	1	1	0	1	0	1	0	0	5	0	1	1	0	1	0	0	3	0	CHEF
chr10	105600354	105600757	chr19	47450244	47452244	200005669	6.40526	1.60286	1	1	1	0	1	1	0	0	1	6	1	0	1	0	0	0	0	2	0	CHEF
chr8	66131603	66132046	chr3	18694631	18696631	500040918	6.38989	1.8997	1	1	0	0	0	0	0	0	0	2	1	1	1	0	1	0	1	5	0	CHEF
chr1	109772183	109772837	chr3	108432748	108434748	600001951	6.38494	4.76934	1	1	1	0	1	0	0	0	1	5	1	1	1	0	1	1	1	6	0	CHEF
chr12	115076784	115077246	chr5	119708806	119710806	500010025	6.38328	2.1243	1	1	0	0	0	0	0	0	0	2	1	1	1	0	1	0	1	5	0	CHEF
chr16	31184339	31184764	chr7	127965248	127967248	400015235	6.37782	2.23807	0	0	0	0	0	0	0	0	0	0	1	1	1	0	1	0	0	4	0	CHEF
chr3	66623087	66623730	chr6	94749823	94751823	500026717	6.37493	2.73186	1	1	1	0	0	0	0	0	1	4	1	1	1	0	1	0	1	5	0	CHEF
chr11	31443195	31443749	chr2	105973119	105975119	400006619	6.32112	1.84724	0	0	0	0	0	0	0	0	0	0	0	1	1	0	1	0	1	4	0	CHEF
chr17	14234875	14235393	chr11	63897263	63899263	400016237	6.29582	4.83769	1	1	0	0	0	0	0	0	0	2	1	0	1	1	0	0	1	4	0	CHEF
chrX	99650111	99650568	chrX	133673119	133675119	300044876	6.27945	1.35585	1	1	1	0	0	0	0	0	0	3	1	0	1	0	0	0	1	3	0	CHEF
chr2	88742740	88743235	chr6	70963536	70965536	400021210	6.2523	4.95451	1	1	0	1	1	0	0	0	0	4	1	1	1	0	1	0	0	4	0	CHEF
chr12	6432334	6432836	chr6	125367089	125369089	300008318	6.25209	5.76699	0	0	0	0	0	0	0	0	0	0	0	1	1	0	1	0	0	3	0	CHEF
chr15	55953449	55954028	chr9	72870921	72872921	500013736	6.25138	2.63806	0	0	0	1	0	0	0	0	0	1	1	1	1	0	1	0	1	5	0	CHEF
chr10	31073829	31074278	chr18	5162300	5164300	300004560	6.24816	2.21259	1	0	1	1	1	1	0	0	0	5	1	0	1	0	0	0	1	3	0	CHEF
chr1	226592519	226592984	chr1	180570375	180572375	400003686	6.24398	7.72395	1	1	1	0	0	0	0	0	0	3	1	1	1	0	0	0	1	4	0	CHEF
chr1	4507988	4508496	chr4	153632476	153634476	300000098	6.2388	0.672741	1	1	1	0	0	0	0	0	0	3	1	0	1	0	1	0	0	3	0	CHEF
chr5	141196077	141196684	chr18	38147897	38149897	500033759	6.21122	3.52585	1	1	1	0	0	0	0	0	0	3	1	1	1	0	1	0	1	5	0	CHEF
chr22	39570454	39571174	chr15	79949671	79951671	400025413	6.21005	5.46527	0	0	1	0	1	0	0	0	0	2	1	0	1	0	1	1	0	4	0	CHEF
chr9	132319516	132320116	chr2	30757667	30759667	600043889	6.19322	7.89871	0	0	0	1	1	1	0	0	0	3	1	1	1	1	1	0	1	6	0	CHEF
chr12	31523755	31524530	chr6	148982068	148984068	400008731	6.18073	7.79159	0	0	0	0	0	0	0	0	0	0	1	0	1	0	1	0	1	4	0	CHEF
chr4	111105457	111106102	chr3	129543572	129545572	500030389	6.17562	1.94375	0	0	0	1	0	0	0	0	0	1	1	1	1	0	1	0	1	5	0	CHEF
chr20	52483412	52484462	chr2	170287637	170289637	300024353	6.15806	6.78554	0	0	0	0	0	0	0	0	0	0	0	1	1	0	1	0	0	3	0	CHEF
chr12	24167807	24168917	chr6	144250861	144252861	500008598	6.14161	0.941251	0	1	1	1	0	0	0	0	0	3	1	1	1	0	1	0	1	5	0	CHEF
chr2	206004666	206005314	chr1	62180936	62182936	200022928	6.14047	3.13422	1	1	1	1	0	0	1	0	0	5	0	0	1	0	1	0	0	2	0	CHEF
chr17	65515889	65516384	chr11	107349201	107351201	300017188	6.12611	3.4658	0	0	0	1	0	0	0	0	0	1	0	1	1	0	0	0	1	3	0	CHEF
chr15	93365026	93366166	chr7	73604719	73606719	400014473	6.12395	1.85019	0	0	0	0	0	0	0	0	0	0	1	0	1	0	1	0	1	4	0	CHEF
chr14	74792517	74793945	chr12	84624272	84626272	600012703	6.0818	10.0415	1	1	1	0	0	0	0	0	0	3	1	1	1	1	1	0	1	6	0	CHEF
chr6	163817813	163818262	chr17	10334270	10336270	500037340	6.06571	1.47803	1	1	1	0	0	0	0	0	0	3	1	1	1	0	1	0	1	5	0	CHEF
chr20	31337722	31338162	chr2	153638625	153640625	300024017	6.03839	7.71165	0	0	0	0	0	0	0	0	0	0	0	0	1	0	1	0	1	3	0	CHEF
chr4	16847941	16848605	chr5	44753552	44755552	400029079	6.02861	5.49136	1	1	1	1	0	0	0	0	0	4	1	1	1	0	1	0	0	4	0	CHEF
chr12	66175615	66176091	chr10	120520334	120522334	300009250	6.00665	2.19185	0	1	0	0	0	0	0	0	0	1	0	1	1	0	0	0	1	3	0	CHEF
chr10	7465430	7465878	chr2	10362443	10364443	500004150	5.98817	2.10751	0	0	0	1	0	0	0	0	0	1	1	1	1	0	1	0	1	5	0	CHEF
chr9	94648933	94649452	chr13	53233950	53235950	200043233	5.97619	1.22057	1	1	1	0	1	1	0	0	0	5	0	0	1	0	0	0	1	2	0	CHEF
chr6	144293911	144294875	chr10	13107174	13109174	500037032	5.94377	1.49687	1	1	1	1	0	0	0	0	0	4	1	1	1	0	1	0	1	5	0	CHEF
chr1	214463206	214463679	chr1	189915578	189917578	500003481	5.93566	1.48924	1	1	0	1	0	0	0	0	0	3	1	1	1	0	1	0	1	5	0	CHEF
chr2	202904119	202904710	chr1	59487248	59489248	200022884	5.87648	1.37138	1	1	1	1	0	0	0	0	0	4	0	0	0	0	1	0	1	2	0	CHEF
chr2	121223502	121224253	chr1	119304642	119306642	700021678	5.84168	0.943631	1	1	1	1	1	1	0	0	1	7	1	1	1	1	1	1	1	7	0	CHEF
chr3	185911826	185912235	chr16	22504474	22506474	400028540	5.83643	1.17094	0	1	0	0	0	0	0	0	0	1	1	0	1	0	1	0	1	4	0	CHEF
chr1	22270753	22271278	chr4	137460010	137462010	300000475	5.83337	2.32541	0	0	0	1	0	0	0	0	0	1	0	1	1	0	0	0	1	3	0	CHEF
chr5	153487226	153487701	chr11	57582321	57584321	300033996	5.81278	1.84723	0	1	0	0	0	0	0	0	0	1	1	1	1	0	0	0	0	3	0	CHEF
chr14	68937957	68938710	chr12	79806926	79808926	500012586	5.81195	4.25728	0	1	0	0	0	0	0	0	0	1	1	1	1	0	1	0	1	5	0	CHEF
chr6	15264990	15265495	chr13	44750930	44752930	500034787	5.80748	2.80083	1	1	1	0	0	0	1	0	0	4	1	1	1	0	1	0	1	5	0	CHEF
chr6	108883803	108884241	chr10	42272901	42274901	400036405	5.78778	1.44976	0	0	0	0	0	0	0	0	0	0	1	0	1	0	1	0	1	4	0	CHEF
chr18	57531311	57531905	chr18	66428331	66430331	500018364	5.77526	3.24542	1	1	1	0	0	0	0	0	0	3	1	1	1	0	1	0	1	5	0	CHEF
chr7	47519985	47520922	chr11	8577848	8579848	500038315	5.76792	1.62915	0	0	0	0	0	0	0	0	0	0	1	1	1	0	1	0	1	5	0	CHEF
chr12	32553235	32553835	chr16	16598216	16600216	500008766	5.73834	6.13533	0	0	1	0	1	0	0	0	0	2	1	1	1	0	1	0	1	5	0	CHEF
chr7	23504472	23505433	chr6	49209396	49211396	500037864	5.69354	4.40158	0	0	0	0	0	0	0	0	0	0	0	1	1	1	1	0	1	5	0	CHEF
chr5	14728454	14728927	chr15	27580792	27582792	500031776	5.69316	3.85214	0	1	0	0	0	0	0	0	0	1	1	1	1	0	1	0	1	5	0	CHEF
chr1	204684054	204684520	chr1	132849957	132851957	400003293	5.66877	1.87447	1	1	1	1	0	0	0	0	0	4	1	0	1	0	1	0	1	4	0	CHEF
chr8	69553138	69553660	chr1	11747694	11749694	500040972	5.66257	4.44041	1	1	1	0	0	0	0	0	0	3	1	1	1	0	1	0	1	5	0	CHEF
chr7	92461000	92461764	chr5	3344640	3346640	400038953	5.64427	3.35256	0	0	0	0	0	0	0	0	0	0	0	1	1	0	1	0	1	4	0	CHEF
chr14	57313665	57314325	chr14	48700091	48702091	500012355	5.63692	1.95619	1	1	1	1	0	1	1	0	1	7	1	1	1	0	1	0	1	5	0	CHEF
chr6	35886874	35887382	chr17	28619811	28621811	500035388	5.63537	1.91729	0	0	0	0	0	0	0	0	0	0	1	1	1	0	1	0	1	5	0	CHEF
chr10	88627936	88628544	chr14	34452917	34454917	500005358	5.61744	6.4146	1	1	0	0	0	0	0	0	0	2	1	1	0	1	1	0	1	5	0	CHEF
chr6	111799955	111800423	chr10	39735528	39737528	400036455	5.58414	0.693491	0	0	0	0	0	0	0	0	1	1	0	1	1	0	1	0	1	4	0	CHEF
chr6	163681287	163681788	chr17	10440740	10442740	500037338	5.57936	2.80434	1	1	1	0	0	1	0	0	0	4	1	1	1	0	1	0	1	5	0	CHEF
chr1	23882307	23882859	chr4	136145962	136147962	500000507	5.5603	4.19257	1	1	1	1	0	1	1	0	1	7	1	1	1	0	1	0	1	5	0	CHEF
chr2	47572010	47572790	chr17	87612629	87614629	400020531	5.53167	5.47647	0	1	0	0	0	0	0	0	0	1	0	1	1	0	1	0	1	4	0	CHEF
chr10	132800651	132801181	chr7	138152729	138154729	200006079	5.52457	4.07864	1	1	1	0	0	0	0	0	1	4	0	0	1	0	1	0	0	2	0	CHEF
chr17	28995936	28996488	chr8	83875380	83877380	500016475	5.51725	3.692	0	0	1	0	1	0	0	0	0	2	0	1	1	1	1	0	1	5	0	CHEF
chr2	174988860	174989390	chr2	73142047	73144047	300022460	5.51643	3.95603	0	1	0	0	0	0	0	0	0	1	0	0	1	0	1	0	1	3	0	CHEF
chr12	4134216	4135066	chr6	127336026	127338026	500008279	5.50754	8.12884	1	1	1	1	0	0	0	0	1	5	1	1	1	0	1	0	1	5	0	CHEF
chr5	67483102	67483996	chr13	101800707	101802707	500032461	5.5	2.61049	1	1	1	0	0	0	0	0	1	4	1	1	1	0	1	0	1	5	0	CHEF
chr17	30412089	30412574	chr8	83875383	83877383	400016502	5.49459	3.63116	0	0	1	0	1	0	0	0	0	2	0	1	1	0	1	0	1	4	0	CHEF
chr17	32077667	32078376	chr11	81612185	81614185	500016521	5.48833	2.0199	1	1	1	0	0	0	0	0	0	3	1	1	1	0	1	0	1	5	0	CHEF
chr15	56029631	56030086	chr9	72811634	72813634	400013738	5.48426	0.752743	1	1	0	0	0	0	0	0	0	2	1	0	1	0	1	0	1	4	0	CHEF
chr13	109926451	109926941	chr8	10664024	10666024	400011685	5.46982	3.24408	0	0	1	0	0	0	0	0	0	1	1	1	1	0	1	0	0	4	0	CHEF
chr1	82951394	82951893	chr3	148342720	148344720	300001562	5.46242	3.00098	0	1	0	0	0	0	0	0	0	1	1	1	1	0	0	0	0	3	0	CHEF
chr2	12858742	12859430	chr12	15813780	15815780	400019995	5.46091	2.68828	0	1	0	0	0	0	0	0	0	1	0	1	1	0	1	0	1	4	0	CHEF
chr12	7951281	7951775	chr6	122715107	122717107	500008355	5.44527	6.7903	1	1	0	0	0	0	0	0	0	2	1	1	1	0	1	0	1	5	0	CHEF
chr16	3058246	3058795	chr17	23694732	23696732	500014683	5.44411	7.47774	0	0	0	0	0	0	0	0	1	1	1	1	1	0	1	0	1	5	0	CHEF
chr2	25482486	25483011	chr12	3884270	3886270	400020164	5.42773	5.55947	0	0	0	0	0	0	0	0	0	0	1	0	1	0	1	0	1	4	0	CHEF
chr12	8058130	8058788	chr6	122715238	122717238	500008361	5.42644	7.92579	1	1	0	0	0	0	0	0	0	2	1	1	1	0	1	0	1	5	0	CHEF
chr11	69025764	69026217	chr7	145134884	145136884	300007177	5.42565	1.79082	1	1	0	0	0	0	0	0	0	2	1	0	1	0	0	0	1	3	0	CHEF
chr12	55391603	55392063	chr10	130293253	130295253	300009088	5.42188	2.44664	1	1	0	0	0	0	0	1	0	3	1	1	1	0	0	0	0	3	0	CHEF
chr6	134395429	134395928	chr10	22608233	22610233	300036841	5.40701	2.50124	0	1	0	0	0	0	0	0	0	1	1	1	1	0	0	0	0	3	0	CHEF
chr13	26485003	26485746	chr14	59736203	59738203	500010475	5.40347	4.76253	1	1	1	0	0	0	0	0	0	3	1	1	1	0	1	0	1	5	0	CHEF
chr15	64992121	64992700	chr9	65678313	65680313	300013913	5.40051	7.56631	0	0	0	0	1	0	0	0	0	1	0	0	1	0	1	0	1	3	0	CHEF
chr3	37343431	37343899	chr9	118537933	118539933	500026186	5.39427	2.63647	0	0	0	0	0	0	0	0	0	0	1	1	1	0	1	0	1	5	0	CHEF
chr1	84158511	84158982	chr3	147180801	147182801	500001580	5.38002	4.9771	1	1	1	1	0	0	1	0	0	5	1	1	1	0	1	0	1	5	0	CHEF
chr3	16852089	16852544	chr17	50426887	50428887	400025846	5.36804	2.48251	1	1	1	0	0	0	0	0	0	3	1	0	1	0	1	0	1	4	0	CHEF
chrX	71216702	71217172	chrX	101934670	101936670	400044678	5.36247	2.12493	0	1	1	0	1	1	0	0	0	4	1	1	1	0	0	0	1	4	0	CHEF
chr18	18966711	18967262	chr18	10460202	10462202	500017767	5.34944	0.778974	1	1	1	0	0	0	0	0	0	3	1	1	1	0	1	0	1	5	0	CHEF
chr5	95231326	95231936	chr13	75764915	75766915	400032955	5.34367	2.08695	1	1	1	0	0	0	0	0	0	3	0	1	1	0	1	0	1	4	0	CHEF
chr6	113908406	113908904	chr10	37377171	37379171	400036501	5.32054	4.36387	1	1	0	0	0	0	0	0	0	2	1	1	1	0	1	0	0	4	0	CHEF
chr5	158384980	158385510	chr11	44760686	44762686	500034078	5.31614	0.978843	1	1	1	0	0	0	0	0	0	3	1	1	1	0	1	0	1	5	0	CHEF
chr8	25366349	25366805	chr14	67674925	67676925	400040369	5.31392	2.90982	0	0	0	0	0	0	0	0	0	0	0	1	1	0	1	0	1	4	0	CHEF
chr17	57917878	57918331	chr11	86583570	86585570	400017068	5.30962	5.28737	0	0	0	0	0	0	0	0	0	0	1	1	1	0	1	0	0	4	0	CHEF
chr14	77428072	77428529	chr12	86835757	86837757	300012748	5.28443	6.54498	0	0	1	0	0	0	0	0	0	1	1	0	1	0	0	0	1	3	0	CHEF
chr1	218207752	218208325	chr1	186921929	186923929	500003551	5.26986	2.08703	1	1	1	1	0	0	0	0	0	4	1	1	1	0	1	0	1	5	0	CHEF
chr10	95032651	95033202	chr19	37877009	37879009	500005457	5.26107	5.84624	1	1	1	1	1	1	1	0	0	7	1	1	1	0	1	0	1	5	0	CHEF
chr14	55143988	55144496	chr14	46988415	46990415	400012313	5.24776	3.0772	1	1	0	0	0	0	0	0	0	2	1	1	1	0	1	0	0	4	0	CHEF
chr17	55543408	55543968	chr11	88533503	88535503	500017014	5.2475	3.53714	1	1	1	0	0	0	0	0	0	3	1	1	1	0	1	0	1	5	0	CHEF
chr4	147393528	147393928	chr8	78555946	78557946	100030913	5.24408	1.45291	1	1	1	0	0	0	1	0	0	4	1	0	0	0	0	0	0	1	0	CHEF
chrX	39676032	39676508	chrX	11802350	11804350	500044429	5.21962	5.14709	0	0	0	0	0	0	0	0	0	0	1	1	1	0	1	0	1	5	0	CHEF
chr11	69987535	69988203	chr7	144627220	144629220	400007201	5.18654	1.91402	0	0	0	0	0	0	0	0	0	0	1	1	1	0	1	0	0	4	0	CHEF
chr16	85612723	85613243	chr8	120508330	120510330	500015893	5.1701	2.47944	1	1	0	0	0	0	0	0	0	2	1	1	0	0	1	1	1	5	0	CHEF
chr12	89743494	89744514	chr10	99264324	99266324	500009592	5.16438	1.89293	0	1	1	0	0	0	0	0	0	2	1	1	1	0	1	0	1	5	0	CHEF
chr14	57370027	57370796	chr14	48753677	48755677	400012363	5.16021	3.71792	1	1	1	0	0	0	0	0	0	3	1	0	1	0	1	0	1	4	0	CHEF
chr1	120601427	120602406	chr3	98023777	98025777	500002129	5.15848	1.80447	0	0	1	0	0	0	0	0	0	1	1	1	1	0	1	0	1	5	0	CHEF
chr8	29301687	29302334	chr8	34731984	34733984	200040436	5.15136	1.31461	1	1	1	0	1	0	0	0	0	4	1	0	1	0	0	0	0	2	0	CHEF
chr1	145219057	145219897	chr3	98023737	98025737	400002218	5.12524	1.44738	0	0	1	0	0	0	0	0	0	1	0	1	1	0	1	0	1	4	0	CHEF
chr11	68607415	68607817	chr19	3323802	3325802	200007171	5.11675	2.49488	1	1	1	1	1	0	0	0	1	6	0	0	1	0	0	0	1	2	0	CHEF
chr6	7685057	7685537	chr13	38301827	38303827	500034620	5.1094	1.01878	0	0	0	0	0	0	0	0	0	0	1	1	1	0	1	0	1	5	0	CHEF
chr6	159331432	159332401	chr17	6859875	6861875	400037270	5.06947	5.13296	1	1	1	0	0	0	0	0	1	4	0	1	1	0	1	0	1	4	0	CHEF
chr20	53782598	53783019	chr2	171284824	171286824	400024374	5.06246	1.20861	0	1	0	0	0	0	0	0	0	1	0	1	1	0	1	0	1	4	0	CHEF
chr1	83313721	83314128	chr3	147962867	147964867	200001568	5.0301	3.69336	1	1	0	0	0	0	0	0	0	2	1	0	0	0	1	0	0	2	0	CHEF
chr2	3269542	3270151	chr12	28816675	28818675	500019857	5.02286	2.68681	1	1	1	0	0	0	0	0	0	3	1	1	1	0	1	0	1	5	0	CHEF
chr8	70891235	70891694	chr1	13077030	13079030	300041003	5.02247	7.68258	0	0	0	0	0	0	0	0	0	0	1	0	0	0	1	0	1	3	0	CHEF
chr14	89762512	89763011	chr12	99299052	99301052	500012923	5.0093	5.90597	1	1	1	0	0	0	1	0	0	4	1	1	1	0	1	0	1	5	0	CHEF
chr16	51215110	51215726	chr8	89072238	89074238	500015344	4.99426	5.1557	0	1	1	1	0	0	0	0	0	3	1	1	1	0	1	0	1	5	0	CHEF
chr2	65806927	65807435	chr11	19810845	19812845	200020859	4.99391	1.59535	1	1	1	0	0	0	0	0	0	3	0	0	1	0	1	0	0	2	0	CHEF
chr2	44771298	44771942	chr17	85256116	85258116	400020477	4.98023	3.35437	0	1	1	0	0	0	0	0	0	2	0	1	1	0	1	0	1	4	0	CHEF
chr6	138876560	138877134	chr10	18422038	18424038	300036933	4.97217	2.14463	1	1	1	1	0	1	0	0	0	5	1	0	0	0	1	0	1	3	0	CHEF
chr3	193661038	193662104	chr16	29882185	29884185	200028676	4.95859	2.91857	1	1	1	0	0	0	0	0	0	3	0	0	1	0	0	0	1	2	0	CHEF
chr10	112427622	112428140	chr19	53696881	53698881	400005762	4.95115	1.44289	1	1	0	0	0	0	0	0	0	2	1	0	1	0	1	0	1	4	0	CHEF
chr12	120799374	120799957	chr5	115435647	115437647	400010124	4.94114	2.60261	0	0	1	0	1	1	0	0	0	3	0	1	1	0	1	0	1	4	0	CHEF
chr10	80999756	81000544	chr14	25603784	25605784	600005250	4.92968	1.81363	1	1	1	0	0	0	0	0	0	3	1	1	1	1	1	0	1	6	0	CHEF
chr19	34129347	34129784	chr7	34797929	34799929	400019241	4.90619	3.88092	1	1	1	0	1	0	0	0	0	4	0	1	1	0	1	0	1	4	0	CHEF
chr2	50842380	50842848	chr17	90695715	90697715	500020591	4.90013	1.22953	0	0	0	0	0	0	0	0	0	0	1	1	1	0	1	0	1	5	0	CHEF
chr12	24286213	24286738	chr6	144360462	144362462	500008599	4.89729	1.07781	1	1	1	1	0	0	1	0	1	6	1	1	1	0	1	0	1	5	0	CHEF
chr16	49590991	49591404	chr8	87715553	87717553	300015312	4.88213	3.02164	1	1	1	0	0	0	0	0	0	3	1	1	0	0	1	0	0	3	0	CHEF
chr2	208199255	208199780	chr1	64304558	64306558	400022983	4.88096	5.02566	0	0	1	0	0	0	0	0	0	1	0	1	1	0	1	1	0	4	0	CHEF
chr12	112306400	112307028	chr5	121536105	121538105	500009973	4.88049	4.9805	0	1	1	1	0	0	0	0	0	3	1	1	1	0	1	0	1	5	0	CHEF
chr18	76743368	76743979	chr18	80981835	80983835	500018608	4.86201	4.67077	1	1	1	0	0	0	0	0	0	3	1	1	1	0	1	0	1	5	0	CHEF
chr2	44657377	44657961	chr17	85148518	85150518	500020472	4.82929	3.4637	0	1	1	0	0	0	0	0	0	2	1	1	1	0	1	0	1	5	0	CHEF
chr5	138903141	138904177	chr18	35756239	35758239	500033698	4.79449	4.40647	1	1	1	1	0	0	1	0	1	6	1	1	1	0	1	0	1	5	0	CHEF
chr20	60011468	60012346	chr2	179570750	179572750	600024456	4.79169	7.00863	1	1	0	0	0	0	0	0	0	2	1	1	1	0	1	1	1	6	0	CHEF
chr11	128740972	128741414	chr9	32368683	32370683	300008117	4.7823	2.23659	1	0	0	0	0	1	0	0	0	2	1	0	1	0	1	0	0	3	0	CHEF
chr9	114013742	114014142	chr4	58719827	58721827	200043533	4.78153	1.21376	1	1	1	0	0	0	0	0	0	3	1	0	0	0	1	0	0	2	0	CHEF
chr18	3454688	3455658	chr17	70846066	70848066	500017549	4.7814	6.49264	0	0	0	0	0	0	0	0	0	0	1	1	1	0	1	0	1	5	0	CHEF
chr5	141218466	141219185	chr18	38174088	38176088	500033760	4.7306	7.37364	1	1	0	0	0	0	0	0	0	2	1	1	1	0	1	0	1	5	0	CHEF
chr10	123339647	123340550	chr7	130251559	130253559	400005947	4.72084	4.10863	1	1	1	1	0	0	1	0	0	5	1	0	1	0	1	0	1	4	0	CHEF
chr20	34961054	34961508	chr2	156642173	156644173	300024071	4.71239	1.13604	1	1	0	0	0	0	0	0	1	3	1	0	1	0	0	0	1	3	0	CHEF
chr9	97587530	97588127	chr13	63094004	63096004	500043284	4.67969	1.6179	1	1	1	0	0	0	0	0	0	3	1	1	1	0	1	0	1	5	0	CHEF
chr2	227024471	227024950	chr1	81717463	81719463	400023299	4.6764	3.02147	1	0	0	0	0	0	0	0	0	1	0	1	1	0	1	0	1	4	0	CHEF
chr11	32114250	32114761	chr2	105396937	105398937	400006634	4.67505	1.4007	0	1	1	1	0	0	0	0	0	3	1	1	1	0	0	0	1	4	0	CHEF
chr12	92860162	92860633	chr10	96308211	96310211	400009638	4.67324	2.57146	0	1	0	0	0	0	0	0	1	2	1	0	1	0	1	0	1	4	0	CHEF
chr12	120826828	120827290	chr5	115403487	115405487	300010126	4.657	2.73642	0	1	1	0	1	0	0	0	0	3	0	1	1	0	0	0	1	3	0	CHEF
chr11	116316205	116317053	chr9	46581102	46583102	500007887	4.62047	6.11439	1	1	1	0	0	0	0	0	1	4	1	1	1	0	1	0	1	5	0	CHEF
chr21	17652512	17653002	chr16	77399715	77401715	300024561	4.59932	1.60617	0	1	1	0	0	0	0	0	0	2	1	0	1	0	1	0	0	3	0	CHEF
chr17	7560222	7560669	chr11	69599303	69601303	200016124	4.57566	6.2636	0	0	0	0	0	0	0	1	0	1	1	0	1	0	0	0	0	2	0	CHEF
chr13	73649520	73650017	chr14	99312124	99314124	500011215	4.53653	3.00758	0	0	1	0	1	0	0	0	0	2	1	1	1	0	1	0	1	5	0	CHEF
chr12	6324265	6324760	chr6	125480114	125482114	400008315	4.51354	6.65794	0	0	0	0	0	0	0	0	0	0	1	1	1	0	1	0	0	4	0	CHEF
chr7	83314143	83314736	chr5	13992300	13994300	500038809	4.48041	1.32275	0	0	0	0	0	0	0	0	0	0	1	1	1	0	1	0	1	5	0	CHEF
chr4	79642853	79643353	chr5	96963400	96965400	400029887	4.47995	1.96349	0	0	1	0	0	0	0	0	0	1	1	1	1	0	0	0	1	4	0	CHEF
chr10	118639371	118639822	chr19	58968285	58970285	300005863	4.46462	1.19066	0	1	1	0	1	0	1	0	0	4	0	0	1	0	1	0	1	3	0	CHEF
chr11	12701978	12702833	chr7	112684421	112686421	500006344	4.45347	2.41424	0	0	0	0	0	0	0	0	0	0	1	1	1	0	1	0	1	5	0	CHEF
chr10	93646764	93647647	chr19	36903400	36905400	300005433	4.45013	2.97494	1	0	1	0	1	0	0	0	0	3	0	1	1	0	1	0	0	3	0	CHEF
chr19	782423	782933	chr10	79840213	79842213	600018653	4.44451	4.42196	1	0	1	1	1	1	0	0	0	5	1	1	1	1	1	0	1	6	0	CHEF
chr8	126132711	126133157	chr15	59391105	59393105	300041858	4.42926	1.31795	1	1	1	1	0	0	0	0	1	5	1	0	1	0	1	0	0	3	0	CHEF
chr2	81101417	81101921	chr6	76638833	76640833	500021097	4.42522	3.75337	1	1	1	0	0	0	0	0	0	3	1	1	1	0	1	0	1	5	0	CHEF
chr2	235357796	235358329	chr1	88667916	88669916	500023416	4.40266	4.29079	1	1	1	0	0	0	0	0	1	4	1	1	1	0	1	0	1	5	0	CHEF
chr1	67924375	67925185	chr6	67229633	67231633	400001343	4.37336	2.58503	0	0	1	0	0	0	0	0	0	1	1	0	1	0	1	0	1	4	0	CHEF
chr13	56654362	56654775	chr14	83007665	83009665	200010978	4.32821	1.199	1	1	1	0	0	0	0	0	0	3	0	0	1	0	0	0	1	2	0	CHEF
chr14	87653033	87653515	chr12	97402181	97404181	500012891	4.31637	1.90699	1	1	1	0	0	0	0	0	0	3	1	1	1	0	1	0	1	5	0	CHEF
chr7	128898463	128898913	chr6	29787967	29789967	500039534	4.3071	2.77032	1	1	0	0	0	0	0	0	0	2	1	1	1	0	1	0	1	5	0	CHEF
chr3	42084605	42085158	chr9	121331436	121333436	300026264	4.29392	4.50494	0	0	0	1	0	0	0	0	0	1	1	1	1	0	0	0	0	3	0	CHEF
chr9	127522982	127523442	chr2	38916340	38918340	500043763	4.28854	2.60984	0	1	0	0	0	0	0	0	0	1	1	1	1	0	1	0	1	5	0	CHEF
chr3	50278484	50278939	chr9	107629767	107631767	500026408	4.27203	3.80167	1	1	1	0	1	1	0	0	0	5	1	1	0	1	1	0	1	5	0	CHEF
chr4	54975438	54976313	chr5	75084512	75086512	500029552	4.25706	1.49676	1	1	1	1	1	1	0	0	0	6	1	1	1	0	1	0	1	5	0	CHEF
chr12	97857888	97859031	chr10	92162165	92164165	500009741	4.23661	5.74886	1	1	1	0	0	0	0	0	0	3	1	1	1	0	1	0	1	5	0	CHEF
chr5	123996418	123997413	chr18	54910263	54912263	400033431	4.23372	4.37438	0	1	1	0	0	0	0	0	0	2	1	0	1	0	1	0	1	4	0	CHEF
chr10	35927870	35928358	chr18	9214119	9216119	300004642	4.22283	2.24986	1	1	1	0	1	0	0	0	0	4	1	0	1	0	0	0	1	3	0	CHEF
chr21	16594297	16594828	chr16	76538901	76540901	400024546	4.20445	1.08442	1	0	0	1	0	0	0	0	0	2	1	0	1	0	1	0	1	4	0	CHEF
chr7	105279571	105280068	chr12	33344083	33346083	500039173	4.2013	6.91366	1	1	0	0	0	0	0	0	0	2	1	1	1	0	1	0	1	5	0	CHEF
chr6	15268639	15269220	chr13	44754696	44756696	400034788	4.18042	3.16123	1	0	1	0	0	0	0	0	0	2	0	1	1	0	1	0	1	4	0	CHEF
chr1	82148040	82148571	chr3	149084443	149086443	400001548	4.16142	3.29334	0	1	0	1	0	0	0	0	0	2	0	1	1	0	1	0	1	4	0	CHEF
chr10	99766023	99766505	chr19	42408442	42410442	200005556	4.13571	1.09162	1	1	1	0	0	0	0	0	0	3	1	1	0	0	0	0	0	2	0	CHEF
chr2	44647851	44648269	chr17	85141814	85143814	400020471	4.1056	1.03772	0	0	1	0	0	0	0	0	0	1	0	1	1	0	1	0	1	4	0	CHEF
chr12	120851803	120852284	chr5	115373030	115375030	400010128	4.09223	2.58363	1	1	1	0	1	0	0	0	0	4	1	1	1	0	0	0	1	4	0	CHEF
chr5	136227247	136227703	chr13	57361510	57363510	400033656	4.08752	1.61938	1	1	1	0	0	0	0	0	0	3	1	1	1	0	0	0	1	4	0	CHEF
chr1	18621105	18621687	chr4	140102879	140104879	300000388	4.08133	6.75293	1	1	0	0	0	0	0	0	0	2	1	0	1	0	1	0	0	3	0	CHEF
chr13	95599714	95600633	chr14	118415095	118417095	500011470	4.05625	2.26829	0	1	1	0	0	1	0	0	0	3	1	1	1	0	1	0	1	5	0	CHEF
chrX	48785029	48785536	chrX	7869703	7871703	500044524	4.04557	5.07133	1	1	1	0	0	0	0	0	0	3	1	1	1	0	1	0	1	5	0	CHEF
chr7	5446997	5447639	chr5	142799751	142801751	500037566	4.0223	3.45708	1	1	1	1	0	0	0	0	1	5	1	1	1	0	1	0	1	5	0	CHEF
chr21	34126417	34126908	chr16	91028649	91030649	500024770	4.00031	0.804373	0	0	1	0	0	0	0	0	1	2	1	1	1	0	1	0	1	5	0	CHEF
chr22	51080174	51080714	chr15	89476964	89478964	400025617	3.9959	2.23086	1	0	0	1	0	0	0	0	0	2	1	1	1	0	0	0	1	4	0	CHEF
chr4	124339526	124340049	chr3	37656309	37658309	400030595	3.99189	6.16569	0	1	1	0	0	0	0	0	0	2	0	1	1	0	1	0	1	4	0	CHEF
chr16	54618946	54619454	chr8	92064762	92066762	300015403	3.97861	4.23327	0	1	0	0	0	0	0	0	1	2	0	1	1	0	0	0	1	3	0	CHEF
chr10	95040434	95041456	chr19	37880812	37882812	500005459	3.97493	9.02881	1	1	1	0	0	0	0	0	1	4	1	1	1	0	1	0	1	5	0	CHEF
chr5	38104491	38105233	chr15	7530349	7532349	400032099	3.96382	2.67346	1	1	0	1	0	0	0	0	0	3	0	1	1	0	1	0	1	4	0	CHEF
chr2	208834712	208835663	chr1	64915838	64917838	500023003	3.95539	5.43044	0	1	1	0	0	0	0	0	0	2	1	1	1	0	1	0	1	5	0	CHEF
chr2	119076793	119077276	chr1	121086302	121088302	500021628	3.95101	7.95279	1	1	0	1	0	0	0	0	0	3	1	1	1	0	1	0	1	5	0	CHEF
chr5	124331488	124332887	chr18	55195806	55197806	400033459	3.9369	3.24096	0	0	1	0	0	0	0	0	0	1	0	1	1	0	1	0	1	4	0	CHEF
chr16	73066513	73067447	chr8	108728784	108730784	400015685	3.93517	0.873312	1	1	1	0	0	0	0	0	0	3	1	0	1	0	1	0	1	4	0	CHEF
chr9	37251280	37251927	chr4	44851012	44853012	500042715	3.91072	3.15822	1	1	1	0	0	0	0	0	0	3	1	1	1	0	1	0	1	5	0	CHEF
chr4	54867746	54868200	chr5	74998267	75000267	200029545	3.91072	1.75187	1	1	1	0	0	0	0	0	1	4	1	0	1	0	0	0	0	2	0	CHEF
chr6	10315217	10315846	chr13	40649024	40651024	500034651	3.90795	2.38516	1	1	0	0	1	1	0	0	1	5	1	1	1	0	1	0	1	5	0	CHEF
chr3	147652097	147653086	chr9	90833074	90835074	500027907	3.8982	5.4685	1	1	1	0	0	0	0	0	0	3	1	1	1	0	1	0	1	5	0	CHEF
chr2	220829915	220830579	chr1	75887603	75889603	500023181	3.87528	3.11859	1	1	1	0	0	0	0	0	1	4	1	1	1	0	1	0	1	5	0	CHEF
chr8	28371193	28371753	chr14	65244543	65246543	500040423	3.86948	2.77606	0	1	0	0	0	0	0	0	0	1	1	1	1	0	1	0	1	5	0	CHEF
chr5	158378955	158379488	chr11	44766481	44768481	300034077	3.86689	0.851531	1	1	1	0	0	0	0	0	1	4	0	0	1	0	1	0	1	3	0	CHEF
chr14	64357975	64358498	chr12	75843818	75845818	500012491	3.86274	5.41167	1	1	0	0	0	0	0	0	0	2	1	1	1	0	1	0	1	5	0	CHEF
chr2	189157383	189157704	chr1	44551436	44553436	300022698	3.82004	8.963	0	0	1	0	1	0	0	0	0	2	0	0	0	1	1	0	1	3	0	CHEF
chr12	79940916	79942072	chr10	108445566	108447566	400009463	3.80155	7.15336	0	0	0	0	0	0	0	0	0	0	1	1	1	0	1	0	0	4	0	CHEF
chr15	69378767	69379225	chr9	62201762	62203762	500014025	3.79293	3.46741	0	0	0	1	1	1	0	0	1	4	1	1	1	0	1	0	1	5	0	CHEF
chr1	204424076	204424598	chr1	133079513	133081513	400003283	3.79003	2.30731	0	1	0	0	0	0	0	0	0	1	1	1	1	0	0	0	1	4	0	CHEF
chr11	72128750	72129316	chr7	101676106	101678106	600007234	3.78548	3.45051	1	1	0	0	0	0	0	0	0	2	1	1	1	1	1	0	1	6	0	CHEF
chr4	145569095	145569570	chr8	80055100	80057100	200030886	3.77438	1.82841	1	1	1	0	0	0	0	0	0	3	0	0	1	0	1	0	0	2	0	CHEF
chr10	75725769	75726326	chr14	20891108	20893108	300005145	3.77153	8.79721	0	0	1	0	0	0	0	0	0	1	0	0	1	0	1	0	1	3	0	CHEF
chr20	21170291	21171535	chr2	146920209	146922209	500023884	3.76419	5.94284	1	1	1	0	0	0	0	0	0	3	1	1	1	0	1	0	1	5	0	CHEF
chr15	57678033	57678591	chr9	71762571	71764571	200013772	3.75166	4.87538	1	1	1	1	0	0	1	0	0	5	0	0	1	0	1	0	0	2	0	CHEF
chr8	65282868	65283330	chr3	17786288	17788288	500040902	3.74187	3.52171	1	1	1	0	1	0	0	0	0	4	1	1	1	0	1	0	1	5	0	CHEF
chr10	74020279	74021059	chr10	59963662	59965662	400005105	3.74099	5.11027	0	0	1	1	0	0	0	0	0	2	1	0	0	0	1	1	1	4	0	CHEF
chr5	16703014	16703595	chr15	25778541	25780541	400031800	3.73159	4.08285	0	0	1	0	0	0	0	0	0	1	0	1	1	0	1	0	1	4	0	CHEF
chr21	18839812	18840447	chr16	78264556	78266556	300024577	3.72449	1.9039	1	1	1	0	0	0	0	0	0	3	1	0	1	0	0	0	1	3	0	CHEF
chr5	124316002	124316719	chr18	55189459	55191459	500033458	3.71997	5.32454	1	1	1	0	1	0	0	0	1	5	1	1	1	0	1	0	1	5	0	CHEF
chr7	47712604	47713051	chr11	8722190	8724190	300038320	3.68444	1.34859	1	1	1	0	0	0	0	0	0	3	1	0	1	0	0	0	1	3	0	CHEF
chr12	125765316	125765861	chr5	125588375	125590375	400010240	3.63075	2.92191	0	0	0	0	0	1	0	0	1	2	1	1	1	0	0	0	1	4	0	CHEF
chr10	75726679	75727208	chr14	20891693	20893693	200005146	3.63037	8.91067	0	0	1	0	0	0	0	0	0	1	1	0	0	0	1	0	0	2	0	CHEF
chr6	107196428	107197030	chr10	43741867	43743867	500036362	3.62162	2.39896	1	1	1	1	0	0	0	0	0	4	1	1	1	0	1	0	1	5	0	CHEF
chr17	18472743	18473343	chr7	73399333	73401333	500016316	3.61814	3.76248	1	1	1	1	0	0	0	0	0	4	1	1	1	0	1	0	1	5	0	CHEF
chr1	156643462	156643894	chr3	87973500	87975500	400002523	3.61604	3.99168	1	1	1	0	0	0	0	0	0	3	1	1	1	0	1	0	0	4	0	CHEF
chr2	149311964	149312726	chr2	49370173	49372173	300022009	3.61076	2.40577	1	1	1	0	0	0	0	0	0	3	0	0	1	0	1	0	1	3	0	CHEF
chr6	42104188	42105525	chr17	47440286	47442286	400035512	3.60327	5.2598	0	0	0	0	0	0	0	0	1	1	1	0	1	0	1	0	1	4	0	CHEF
chr1	45196092	45197259	chr4	117209623	117211623	400000936	3.60324	3.78865	0	1	0	0	0	0	0	0	0	1	1	0	1	0	1	0	1	4	0	CHEF
chr7	4746760	4747216	chr5	142414678	142416678	500037556	3.58322	1.99262	0	0	1	0	0	0	0	0	0	1	1	1	1	0	1	0	1	5	0	CHEF
chr17	41188213	41188664	chr11	101478459	101480459	400016721	3.57979	2.61011	1	1	1	0	0	0	0	0	0	3	1	1	1	0	1	0	0	4	0	CHEF
chr7	68814199	68814677	chr5	132727784	132729784	400038535	3.57078	1.01929	0	1	1	0	0	0	0	0	0	2	1	1	1	0	0	0	1	4	0	CHEF
chr15	93604792	93605425	chr7	73399366	73401366	500014483	3.56925	4.40405	1	1	1	1	0	0	0	0	0	4	1	1	1	0	1	0	1	5	0	CHEF
chr4	113668127	113668800	chr3	127463076	127465076	500030444	3.56909	6.22112	1	1	1	0	0	0	0	0	0	3	1	1	1	0	1	0	1	5	0	CHEF
chr4	113672569	113673044	chr3	127458987	127460987	100030445	3.5611	10.6296	1	0	0	0	0	0	0	0	0	1	0	0	0	0	1	0	0	1	0	CHEF
chr7	21069826	21070352	chr12	118658620	118660620	500037813	3.55273	3.00936	1	1	1	0	0	0	0	0	0	3	1	1	1	0	1	0	1	5	0	CHEF
chr5	97849067	97849489	chr17	15989465	15991465	200032994	3.54273	1.1875	1	1	0	1	0	0	0	0	0	3	1	0	1	0	0	0	0	2	0	CHEF
chr22	32143418	32143897	chr5	32850398	32852398	400025290	3.51686	2.58792	0	1	0	0	0	0	0	0	0	1	0	1	1	0	1	0	1	4	0	CHEF
chr12	128867909	128868341	chr5	127338094	127340094	300010277	3.50322	0.823051	0	1	1	0	1	0	0	0	0	3	0	1	1	0	0	0	1	3	0	CHEF
chr3	64851811	64852284	chr6	93130425	93132425	400026673	3.48856	1.11325	1	1	0	0	0	0	0	0	0	2	1	0	1	0	1	0	1	4	0	CHEF
chr15	101587503	101588009	chr7	66282345	66284345	400014595	3.48771	1.26274	0	0	0	0	1	0	0	0	0	1	1	0	1	0	1	0	1	4	0	CHEF
chr10	26055184	26056149	chr2	21963166	21965166	500004474	3.47586	2.98086	1	1	1	0	0	0	0	0	0	3	1	1	1	0	1	0	1	5	0	CHEF
chr17	9233303	9233806	chr11	68145725	68147725	400016173	3.47448	2.14602	0	1	1	0	1	0	0	0	0	3	1	1	1	0	0	0	1	4	0	CHEF
chr10	95039794	95040275	chr19	37880005	37882005	100005458	3.44307	8.21065	1	1	1	0	0	0	0	0	1	4	0	0	0	0	1	0	0	1	0	CHEF
chr6	34099657	34100141	chr17	27500936	27502936	300035341	3.44048	5.54252	1	1	1	0	0	0	0	0	0	3	1	0	1	0	0	0	1	3	0	CHEF
chr10	34702100	34702532	chr8	127342382	127344382	500004613	3.42518	1.79277	1	1	1	0	0	0	0	0	0	3	1	1	1	0	1	0	1	5	0	CHEF
chr1	44883114	44883541	chr4	117483812	117485812	200000923	3.37582	2.19185	1	1	1	0	1	0	0	0	1	5	1	1	0	0	0	0	0	2	0	CHEF
chr7	2564320	2564813	chr5	140611047	140613047	500037519	3.37228	5.20164	1	1	1	1	1	0	0	0	0	5	1	1	1	1	0	0	1	5	0	CHEF
chr4	54881550	54882261	chr5	75012120	75014120	500029546	3.34672	2.53231	1	1	1	0	0	0	0	0	0	3	1	1	1	0	1	0	1	5	0	CHEF
chr7	70165046	70165969	chr5	131530841	131532841	500038571	3.33293	3.57734	1	1	1	0	0	0	0	0	0	3	1	1	1	0	1	0	1	5	0	CHEF
chr16	19893404	19893902	chr7	118991715	118993715	500015031	3.31611	4.32525	1	1	0	1	0	0	0	0	0	3	1	1	1	0	1	0	1	5	0	CHEF
chr12	39787705	39788154	chr15	91017795	91019795	400008810	3.31056	3.15158	1	1	0	0	0	0	0	0	0	2	1	1	1	0	1	0	0	4	0	CHEF
chr3	114074931	114075408	chr16	43602979	43604979	500027353	3.30718	2.32606	1	1	1	0	0	0	0	0	0	3	1	1	1	0	1	0	1	5	0	CHEF
chr13	30517437	30517932	chr5	148646405	148648405	400010551	3.30328	1.58031	0	0	0	0	0	0	0	0	1	1	1	1	1	0	0	0	1	4	0	CHEF
chr8	81825797	81826207	chr3	9653441	9655441	300041183	3.30193	0.849649	1	1	1	0	0	0	0	0	0	3	0	1	1	0	0	0	1	3	0	CHEF
chr8	128822027	128822927	chr15	62053340	62055340	600041919	3.29693	7.89363	0	0	0	0	0	0	0	0	0	0	1	1	1	0	1	1	1	6	0	CHEF
chr12	94135488	94136226	chr10	95264280	95266280	500009664	3.29491	5.98494	0	0	0	0	0	0	0	0	0	0	1	1	1	0	1	0	1	5	0	CHEF
chr3	65525168	65525686	chr6	93848463	93850463	500026688	3.26957	2.44041	1	1	0	0	0	0	0	0	0	2	1	1	1	0	1	0	1	5	0	CHEF
chr1	86072897	86073456	chr3	145632099	145634099	400001622	3.2653	3.13915	0	0	0	1	0	0	0	0	0	1	1	0	1	0	1	0	1	4	0	CHEF
chr15	30196280	30196701	chr7	65449561	65451561	200013327	3.26343	2.12163	1	1	1	0	0	0	0	0	0	3	1	0	0	0	1	0	0	2	0	CHEF
chr20	50575346	50576033	chr2	168837877	168839877	500024317	3.2632	3.03357	1	1	1	0	0	0	0	0	0	3	1	1	1	0	1	0	1	5	0	CHEF
chr15	93905326	93905837	chr7	73140496	73142496	500014495	3.25144	0.89949	1	0	0	0	0	0	0	0	0	1	1	1	1	0	1	0	1	5	0	CHEF
chr12	69860614	69861051	chr10	117151433	117153433	300009307	3.24597	2.35467	1	1	1	0	0	0	0	0	0	3	0	1	1	0	1	0	0	3	0	CHEF
chr20	30183362	30183913	chr2	152728349	152730349	500023983	3.2439	4.96076	0	0	0	1	0	0	0	0	1	2	1	1	1	0	1	0	1	5	0	CHEF
chr5	174974736	174975341	chr13	54117641	54119641	500034350	3.24382	4.40518	1	1	1	0	0	0	0	0	0	3	1	1	1	0	1	0	1	5	0	CHEF
chr17	36607168	36608378	chr11	97437489	97439489	500016601	3.24299	9.86694	0	0	0	0	0	0	0	0	0	0	0	0	1	1	1	1	1	5	0	CHEF
chr1	205270350	205271027	chr1	132332868	132334868	700003309	3.23142	5.7292	0	0	0	0	0	0	0	0	1	1	1	1	1	1	1	1	1	7	0	CHEF
chr8	32077534	32078054	chr8	32292745	32294745	500040485	3.23102	1.058	0	0	1	1	1	0	0	0	0	3	1	1	1	0	1	0	1	5	0	CHEF
chr16	74054018	74054601	chr8	107832735	107834735	400015707	3.22522	1.60014	0	1	1	0	0	0	0	0	0	2	0	1	1	0	1	0	1	4	0	CHEF
chr6	88408172	88408657	chr4	34553489	34555489	400036066	3.18508	3.1742	0	1	0	0	0	0	0	0	0	1	1	1	0	0	1	0	1	4	0	CHEF
chr10	71328554	71329148	chr10	62136220	62138220	400005053	3.18291	2.02268	0	1	0	1	0	0	0	0	0	2	1	1	0	1	0	0	1	4	0	CHEF
chr1	57042719	57043167	chr4	105158447	105160447	300001112	3.17863	3.17976	1	1	0	0	0	0	0	0	0	2	1	0	1	0	1	0	0	3	0	CHEF
chr1	82269341	82270410	chr3	148985706	148987706	500001553	3.16947	2.7865	1	1	1	1	0	0	0	0	0	4	1	1	1	0	1	0	1	5	0	CHEF
chr3	61684976	61685914	chr14	11681428	11683428	500026591	3.15046	7.06499	0	0	0	0	0	0	0	0	0	0	1	1	1	0	1	0	1	5	0	CHEF
chr6	106449850	106450288	chr10	44519432	44521432	400036345	3.14456	1.77128	1	1	1	0	0	0	0	0	0	3	0	1	1	0	1	0	1	4	0	CHEF
chr14	68727749	68728265	chr12	79624987	79626987	500012579	3.13951	4.49689	1	1	1	0	0	0	0	0	0	3	1	1	1	0	1	0	1	5	0	CHEF
chr10	80673415	80673892	chr14	25317180	25319180	300005241	3.12979	1.51991	1	1	1	0	1	0	0	0	0	4	1	1	1	0	0	0	0	3	0	CHEF
chr5	11385986	11386554	chr15	30644955	30646955	500031731	3.10781	1.2495	0	1	0	0	0	0	0	0	0	1	1	1	1	0	1	0	1	5	0	CHEF
chr11	8692694	8693148	chr7	109506358	109508358	300006262	3.08698	4.02948	0	0	1	0	0	0	0	0	0	1	1	0	1	0	1	0	0	3	0	CHEF
chr1	39193324	39193764	chr4	124034914	124036914	400000821	3.06249	2.85898	1	1	1	0	0	0	0	0	0	3	1	1	1	0	1	0	0	4	0	CHEF
chr7	94276571	94277057	chr6	4737897	4739897	400038982	3.06018	1.6179	1	1	1	1	0	0	0	0	1	5	1	0	1	0	1	0	1	4	0	CHEF
chr1	210424377	210425135	chr1	192834022	192836022	300003404	3.05808	3.69283	1	1	1	0	1	0	0	0	0	4	1	1	0	0	0	0	1	3	0	CHEF
chr17	44849402	44850247	chr11	103808506	103810506	500016807	3.05263	3.17546	1	1	1	0	0	0	0	0	0	3	1	1	1	0	1	0	1	5	0	CHEF
chr1	63664697	63665687	chr4	99572845	99574845	400001247	3.05201	1.76001	0	0	1	0	0	0	0	0	0	1	1	0	1	0	1	0	1	4	0	CHEF
chr17	44810056	44810492	chr11	103840111	103842111	400016806	3.04444	1.9796	0	1	1	0	0	0	0	0	0	2	1	0	1	0	1	0	1	4	0	CHEF
chr9	112789898	112790314	chr4	57765099	57767099	300043512	3.044	1.26274	1	1	1	1	0	0	0	0	0	4	0	1	1	0	1	0	0	3	0	CHEF
chr2	224482820	224483421	chr1	79453353	79455353	600023257	3.04289	0.856288	0	0	1	0	0	0	0	0	0	1	1	1	1	0	1	1	1	6	0	CHEF
chr6	137744595	137745238	chr10	19403421	19405421	500036905	3.03802	4.78324	1	1	1	0	1	0	0	0	0	4	1	1	1	0	1	0	1	5	0	CHEF
chr8	118725184	118725667	chr15	52966597	52968597	200041738	3.0364	3.24247	1	1	1	0	1	1	0	0	0	5	1	0	1	0	0	0	0	2	0	CHEF
chr4	160528901	160529364	chr3	78791715	78793715	400031123	3.01473	2.30874	0	0	1	0	0	0	0	0	0	1	1	1	1	0	0	0	1	4	0	CHEF
chr13	73612188	73612627	chr14	99277658	99279658	400011209	2.99597	1.22122	0	1	0	0	0	0	0	0	0	1	0	1	1	0	1	0	1	4	0	CHEF
chr7	14024877	14025307	chr12	38783453	38785453	300037702	2.97915	3.42852	1	1	1	0	0	0	0	0	0	3	0	0	1	0	1	0	1	3	0	CHEF
chr9	38214356	38214833	chr4	45653465	45655465	500042738	2.97836	0.749906	1	1	1	1	0	0	0	0	0	4	1	1	1	0	1	0	1	5	0	CHEF
chr15	57490720	57491133	chr9	71915097	71917097	400013762	2.9718	4.5975	1	1	0	0	0	0	0	0	0	2	1	0	1	0	1	0	1	4	0	CHEF
chr18	18798748	18799237	chr18	10310364	10312364	300017760	2.9639	0.720839	1	1	1	1	0	0	0	0	0	4	0	0	1	0	1	0	1	3	0	CHEF
chr6	40965145	40965727	chr17	48504016	48506016	500035483	2.95929	6.87523	0	0	1	0	0	0	0	0	0	1	1	1	1	0	1	0	1	5	0	CHEF
chr3	30591053	30591531	chr9	116212418	116214418	400026069	2.94745	4.10557	0	1	1	0	0	0	0	0	0	2	0	1	1	0	1	0	1	4	0	CHEF
chr2	144664375	144664872	chr2	44537367	44539367	500021945	2.94685	2.33146	1	1	1	0	0	0	0	0	0	3	1	1	1	0	1	0	1	5	0	CHEF
chr3	61673839	61674613	chr14	11670108	11672108	500026590	2.93404	3.23087	0	0	1	0	0	0	0	0	0	1	1	1	1	0	1	0	1	5	0	CHEF
chr15	96630261	96630989	chr7	70590812	70592812	500014524	2.90554	0.847955	1	1	1	0	0	0	0	0	0	3	1	1	1	0	1	0	1	5	0	CHEF
chr5	53313844	53314802	chr13	114050702	114052702	500032265	2.89414	6.86967	0	0	0	0	0	0	0	0	0	0	1	1	1	0	1	0	1	5	0	CHEF
chr17	35582424	35582910	chr11	84276161	84278161	300016578	2.88548	1.73242	1	1	1	1	0	0	0	0	1	5	1	0	1	0	1	0	0	3	0	CHEF
chr6	138806292	138806757	chr10	18481720	18483720	300036926	2.87404	3.74635	0	1	1	0	0	0	0	0	0	2	0	1	1	0	0	0	1	3	0	CHEF
chr6	113885639	113886304	chr10	37396613	37398613	400036500	2.87226	1.80586	0	0	1	0	0	0	0	0	0	1	1	0	1	0	1	0	1	4	0	CHEF
chr2	45029948	45030467	chr17	85486109	85488109	500020483	2.86952	2.60344	0	0	1	0	1	0	0	0	0	2	1	1	1	0	1	0	1	5	0	CHEF
chr8	9121336	9122407	chr8	35268538	35270538	500040135	2.86077	6.48554	1	1	0	0	0	0	0	0	0	2	1	1	1	0	1	0	1	5	0	CHEF
chr2	25668310	25668773	chr12	3738266	3740266	300020167	2.8537	1.52709	1	1	1	0	0	0	0	0	0	3	1	0	1	0	1	0	0	3	0	CHEF
chrX	68066417	68066842	chrX	99152163	99154163	300044639	2.82734	1.83155	1	1	1	0	0	0	0	0	0	3	1	1	1	0	0	0	0	3	0	CHEF
chr6	43969745	43970586	chr17	45804925	45806925	600035551	2.82461	3.78865	0	0	1	0	1	0	0	0	0	2	0	1	1	1	1	1	1	6	0	CHEF
chr10	104102218	104102668	chr19	46243861	46245861	500005628	2.79742	0.853259	1	1	0	0	0	0	0	0	0	2	1	1	1	0	1	0	1	5	0	CHEF
chr18	61940920	61941387	chr1	107977561	107979561	500018444	2.78695	7.02359	1	1	1	0	0	0	0	0	0	3	1	1	1	0	1	0	1	5	0	CHEF
chr17	63568770	63569771	chr11	108908273	108910273	600017160	2.78695	5.59691	0	0	0	1	0	0	0	0	0	1	1	1	1	0	1	1	1	6	0	CHEF
chr21	18810927	18811386	chr16	78237582	78239582	400024575	2.75851	1.01018	0	0	1	0	0	0	0	0	1	2	1	0	1	0	1	0	1	4	0	CHEF
chr8	41218312	41218784	chr8	23360026	23362026	500040637	2.75226	3.38938	1	1	1	0	0	0	0	0	1	4	1	1	1	0	1	0	1	5	0	CHEF
chr10	35926219	35927084	chr18	9215545	9217545	400004641	2.74556	2.27951	1	1	1	0	0	0	0	0	0	3	0	1	1	0	1	0	1	4	0	CHEF
chr16	75870207	75870621	chr8	112092261	112094261	200015749	2.72636	0.833445	1	1	0	0	0	0	0	0	1	3	0	0	1	0	0	0	1	2	0	CHEF
chr7	7832876	7833320	chr6	8367565	8369565	400037623	2.70163	3.51779	0	0	1	0	0	0	0	0	0	1	1	1	1	0	0	0	1	4	0	CHEF
chr10	126158472	126158974	chr7	132615536	132617536	500006005	2.68463	4.63231	1	1	1	0	0	0	0	0	1	4	1	1	1	0	1	0	1	5	0	CHEF
chr7	8186665	8187111	chr6	8660730	8662730	300037633	2.67414	1.2255	1	1	1	1	0	0	0	0	0	4	1	0	1	0	0	0	1	3	0	CHEF
chr7	82071396	82071844	chr5	15935116	15937116	400038782	2.6717	2.95237	1	1	0	0	0	0	0	0	0	2	1	1	1	0	0	0	1	4	0	CHEF
chr13	100313472	100314414	chr14	122228030	122230030	400011542	2.66652	3.41103	0	1	0	0	0	0	0	0	0	1	0	1	1	0	1	0	1	4	0	CHEF
chr9	76230419	76230921	chr19	19944087	19946087	500042955	2.66578	2.82808	1	1	0	0	0	0	0	0	0	2	1	1	1	0	1	0	1	5	0	CHEF
chr3	193493222	193493891	chr16	29722381	29724381	500028671	2.64258	2.27374	1	1	1	0	0	0	0	0	0	3	1	1	1	0	1	0	1	5	0	CHEF
chr11	30582123	30582642	chr2	106719465	106721465	500006606	2.63929	3.89874	0	1	0	0	0	0	0	0	0	1	1	1	1	0	1	0	1	5	0	CHEF
chr6	164765618	164766621	chr17	9579007	9581007	500037349	2.63853	3.12439	1	1	1	0	0	0	0	0	1	4	1	1	1	0	1	0	1	5	0	CHEF
chr6	3341375	3342093	chr13	34238441	34240441	300034531	2.62769	2.65385	1	0	0	0	0	0	0	0	0	1	0	1	1	0	1	0	0	3	0	CHEF
chrX	150408166	150408665	chrX	71699971	71701971	200045286	2.62616	2.22656	1	1	1	0	0	0	0	0	1	4	1	0	1	0	0	0	0	2	0	CHEF
chr5	58422953	58423960	chr13	109821841	109823841	500032336	2.62139	3.35636	0	0	1	0	0	0	0	0	0	1	1	0	1	0	1	1	1	5	0	CHEF
chr12	39845749	39846248	chr15	91055352	91057352	500008812	2.60611	3.30686	1	1	1	0	0	0	0	0	0	3	1	1	1	0	1	0	1	5	0	CHEF
chr12	118558277	118558925	chr5	117304473	117306473	600010087	2.60492	5.9174	0	0	0	0	0	0	0	0	0	0	1	1	1	0	1	1	1	6	0	CHEF
chr4	113573249	113573794	chr3	127540593	127542593	500030441	2.59693	8.53098	0	0	0	0	0	0	0	0	0	0	1	1	1	0	1	0	1	5	0	CHEF
chr6	163520481	163520953	chr17	10566710	10568710	500037334	2.59496	3.36042	1	1	1	0	0	0	0	0	0	3	1	1	1	0	1	0	1	5	0	CHEF
chr16	85470511	85471123	chr8	120407205	120409205	200015889	2.5885	4.6176	1	1	1	0	1	0	0	0	0	4	1	0	1	0	0	0	0	2	0	CHEF
chr9	92049981	92050493	chr13	51746992	51748992	500043198	2.58448	6.99222	0	0	0	0	0	0	0	0	0	0	1	1	1	0	1	0	1	5	0	CHEF
chr1	27333535	27333974	chr4	133484846	133486846	500000607	2.58202	7.5936	0	0	1	0	0	0	0	0	0	1	1	1	1	0	1	0	1	5	0	CHEF
chr9	129438947	129439528	chr2	33579807	33581807	700043815	2.56818	1.90172	1	1	1	1	1	0	0	0	0	5	1	1	1	1	1	1	1	7	0	CHEF
chr6	167854144	167854954	chr17	13478361	13480361	500037407	2.56368	6.64341	0	0	0	0	0	0	0	0	0	0	1	1	1	0	1	0	1	5	0	CHEF
chr2	5866023	5866803	chr12	27319869	27321869	600019886	2.55839	4.28223	1	1	1	0	0	0	0	0	0	3	1	1	1	1	1	0	1	6	0	CHEF
chr7	21209111	21210033	chr12	118529049	118531049	400037816	2.55776	2.37472	0	0	1	0	1	0	0	0	0	2	0	1	1	0	1	0	1	4	0	CHEF
chr12	68737904	68738343	chr10	118125667	118127667	300009289	2.5547	1.08427	1	1	0	0	0	0	0	0	0	2	0	0	1	0	1	0	1	3	0	CHEF
chr4	105413042	105413961	chr3	134238110	134240110	300030288	2.54626	2.73008	1	0	0	0	0	0	0	0	0	1	1	0	1	0	1	0	0	3	0	CHEF
chr2	222332934	222333459	chr1	77412134	77414134	500023200	2.5358	0.855383	0	0	1	0	0	0	0	0	0	1	1	1	1	0	1	0	1	5	0	CHEF
chr3	186992342	186993207	chr16	23503465	23505465	300028566	2.51657	4.11075	1	1	0	0	0	0	0	0	0	2	1	1	0	0	1	0	0	3	0	CHEF
chr6	94496059	94497065	chr4	28299148	28301148	500036176	2.514	4.79529	1	1	1	0	0	0	0	0	0	3	1	1	1	0	1	0	1	5	0	CHEF
chr1	64959424	64960045	chr4	100797602	100799602	500001279	2.51218	3.48198	0	0	0	1	0	0	0	0	0	1	1	1	1	0	1	0	1	5	0	CHEF
chr1	75548884	75549363	chr3	154380829	154382829	500001452	2.50644	2.14012	1	1	1	0	0	0	0	0	0	3	1	1	1	0	1	0	1	5	0	CHEF
chr2	50345987	50346886	chr17	90243875	90245875	500020582	2.496	2.57794	0	1	0	0	0	0	0	0	0	1	1	1	1	0	1	0	1	5	0	CHEF
chr4	139580995	139581553	chr3	50881497	50883497	400030788	2.46538	5.15277	1	1	1	0	0	0	0	0	0	3	1	0	1	0	1	0	1	4	0	CHEF
chr3	65386473	65387512	chr6	93716114	93718114	500026686	2.46382	3.26401	1	1	0	0	0	0	0	0	1	3	1	1	1	0	1	0	1	5	0	CHEF
chr7	27642358	27642860	chr6	52597311	52599311	500037961	2.42863	4.88543	0	0	1	0	0	0	0	0	0	1	1	1	1	0	1	0	1	5	0	CHEF
chr17	49123003	49123474	chr11	94044145	94046145	300016923	2.42673	2.96914	0	1	0	0	0	0	0	0	0	1	0	0	1	0	1	0	1	3	0	CHEF
chr1	51165735	51166303	chr4	109761964	109763964	500001019	2.41681	4.84847	1	1	1	0	0	0	0	0	0	3	1	1	1	0	1	0	1	5	0	CHEF
chr18	53155701	53156241	chr18	69436094	69438094	500018289	2.41405	2.62326	0	0	0	1	0	0	0	0	1	2	1	1	1	0	1	0	1	5	0	CHEF
chr8	31096423	31096940	chr8	33198353	33200353	500040476	2.34357	5.4297	1	1	0	0	0	0	0	0	0	2	1	1	1	0	1	0	1	5	0	CHEF
chr6	56407320	56408275	chr1	34235388	34237388	600035715	2.3382	2.1015	0	0	1	0	1	0	0	0	1	3	1	0	1	1	1	1	1	6	0	CHEF
chr3	62400532	62402061	chr14	12388248	12390248	500026612	2.33046	2.78675	0	0	1	0	0	0	0	0	0	1	1	1	1	0	1	0	1	5	0	CHEF
chr5	149547340	149547849	chr18	61034009	61036009	200033916	2.32246	0.786241	1	1	0	1	0	0	0	0	0	3	1	1	0	0	0	0	0	2	0	CHEF
chr6	107932202	107932657	chr10	43042579	43044579	400036377	2.31245	1.19355	0	1	0	1	0	0	0	0	0	2	0	1	1	0	1	0	1	4	0	CHEF
chr2	210479421	210480208	chr1	66348531	66350531	500023031	2.30747	3.76125	0	0	1	0	0	0	0	0	0	1	1	1	1	0	1	0	1	5	0	CHEF
chr18	34942062	34942492	chr18	25567050	25569050	300018048	2.30369	1.14252	1	0	0	0	0	0	0	0	0	1	1	0	1	0	0	0	1	3	0	CHEF
chr15	93286265	93286704	chr7	73643506	73645506	300014468	2.30188	4.94672	1	0	0	0	0	0	0	0	0	1	1	1	0	0	1	0	0	3	0	CHEF
chr7	8481661	8482735	chr6	8956286	8958286	500037637	2.29387	1.15932	1	1	1	0	0	0	0	0	1	4	1	1	1	1	1	0	0	5	0	CHEF
chr18	59304499	59305553	chr1	105094066	105096066	500018391	2.27932	1.89162	1	1	0	1	0	0	0	0	0	3	1	1	1	0	1	0	1	5	0	CHEF
chr1	183372531	183373195	chr1	152972961	152974961	500002986	2.2702	3.8311	1	1	1	0	0	0	0	0	0	3	1	1	1	0	1	0	1	5	0	CHEF
chr9	107731066	107731874	chr4	53195961	53197961	300043432	2.27001	2.79828	1	1	0	0	0	0	0	0	0	2	1	0	1	0	0	1	0	3	0	CHEF
chr7	115166341	115166796	chr6	16364648	16366648	500039328	2.26735	2.46491	1	1	0	0	0	0	0	0	0	2	1	1	1	0	1	0	1	5	0	CHEF
chr15	41218085	41218976	chr2	119321872	119323872	300013524	2.26716	0.757588	1	0	1	0	1	0	0	0	0	3	1	0	1	0	0	0	1	3	0	CHEF
chr13	35390240	35390674	chr3	56301948	56303948	300010623	2.24931	3.10354	1	1	1	0	0	0	0	0	0	3	1	0	1	0	1	0	0	3	0	CHEF
chr4	779083	779527	chr5	108518097	108520097	300028784	2.2383	2.34526	1	1	1	1	0	0	0	0	0	4	1	0	1	0	0	0	1	3	0	CHEF
chr1	2179644	2180125	chr4	155207319	155209319	500000048	2.23666	8.38044	0	0	0	0	0	0	0	0	0	0	1	1	1	0	1	0	1	5	0	CHEF
chr20	9553219	9554158	chr2	136106889	136108889	500023690	2.20128	2.66768	1	1	0	0	0	0	0	0	1	3	1	1	1	0	1	0	1	5	0	CHEF
chr14	36973928	36974388	chr12	56519555	56521555	400012059	2.19578	0.970247	1	1	1	0	1	0	1	0	0	5	1	1	1	0	0	0	1	4	0	CHEF
chr1	173399835	173400294	chr1	161273183	161275183	400002843	2.15988	3.68121	1	1	1	0	0	0	0	0	0	3	1	1	1	0	1	0	0	4	0	CHEF
chr3	189523883	189524761	chr16	25817208	25819208	400028607	2.1526	1.46154	0	0	1	0	0	0	0	0	0	1	0	1	1	0	1	0	1	4	0	CHEF
chr2	48510652	48511118	chr17	88403479	88405479	200020550	2.14732	2.24452	1	1	1	0	0	0	0	0	0	3	0	0	1	0	1	0	0	2	0	CHEF
chr1	33202257	33202816	chr4	129250780	129252780	500000720	2.13826	3.55495	1	0	0	0	0	0	0	0	1	2	1	1	1	0	1	0	1	5	0	CHEF
chr15	37189975	37191346	chr2	115869527	115871527	500013454	2.13729	2.59611	1	0	0	0	0	0	0	0	0	1	1	1	1	0	1	0	1	5	0	CHEF
chr5	134878748	134879489	chr13	56257397	56259397	500033635	2.13729	0.715392	0	1	1	0	0	0	0	0	0	2	1	1	1	0	1	0	1	5	0	CHEF
chr13	95358637	95359450	chr14	118229412	118231412	500011466	2.13605	2.14921	1	1	1	0	0	0	0	0	0	3	1	1	1	0	1	0	1	5	0	CHEF
chr17	55149701	55150203	chr11	88872802	88874802	300016999	2.13431	2.13053	0	0	0	1	0	0	0	0	0	1	0	1	1	0	1	0	0	3	0	CHEF
chr17	70147092	70147981	chr11	112810474	112812474	500017247	2.10855	4.53034	1	1	1	0	0	0	0	0	0	3	1	1	1	0	1	0	1	5	0	CHEF
chr6	19691543	19692401	chr13	48130041	48132041	500034851	2.09398	3.29503	1	1	1	0	1	0	0	0	0	4	1	1	1	0	1	0	1	5	0	CHEF
chr12	71950195	71950644	chr10	115474205	115476205	300009346	2.08104	1.02578	1	0	0	0	0	0	0	0	0	1	1	0	1	0	0	0	1	3	0	CHEF
chr22	19879060	19879512	chr16	18459140	18461140	300025063	2.08011	2.72357	0	1	1	0	0	0	0	0	1	3	0	1	1	0	0	0	1	3	0	CHEF
chr20	33753935	33754415	chr2	155741977	155743977	400024055	2.07894	2.89602	0	0	0	0	1	0	0	0	0	1	1	1	1	0	0	0	1	4	0	CHEF
chr17	46796976	46797580	chr11	96202144	96204144	500016860	2.07362	2.02632	0	0	1	0	1	0	0	0	0	2	1	1	1	0	1	0	1	5	0	CHEF
chr3	134611138	134611565	chr9	102261156	102263156	200027679	2.07362	0.64852	1	1	1	1	0	0	0	0	0	4	0	1	1	0	0	0	0	2	0	CHEF
chr10	54137909	54138369	chr19	30504765	30506765	200004809	2.06321	0.816825	1	1	1	0	0	0	0	0	0	3	0	0	1	0	0	0	1	2	0	CHEF
chr22	36232277	36232720	chr15	77149583	77151583	300025337	2.05703	3.82526	0	1	0	0	0	0	0	0	0	1	0	1	1	0	0	0	1	3	0	CHEF
chr7	20822750	20823150	chr12	118849664	118851664	300037806	2.05461	3.48955	1	1	0	0	0	0	0	0	0	2	1	0	0	0	1	0	1	3	0	CHEF
chr7	95772803	95773545	chr6	6069222	6071222	500039005	2.04621	0.910216	1	1	1	0	0	0	0	0	0	3	1	1	1	0	1	0	1	5	0	CHEF
chr13	95477751	95478270	chr14	118317775	118319775	400011469	2.04044	2.8058	0	0	0	0	0	0	0	0	1	1	1	0	1	0	1	0	1	4	0	CHEF
chr14	99117290	99117690	chr12	107527502	107529502	200013050	2.03898	2.36089	1	1	1	1	0	0	0	0	0	4	1	0	0	0	0	0	1	2	0	CHEF
chrX	139436677	139437142	chrX	60771494	60773494	300045223	2.03822	1.61325	1	1	1	1	0	0	0	0	1	5	1	0	1	0	0	0	1	3	0	CHEF
chr14	59255804	59256245	chr12	71449283	71451283	400012402	2.03586	1.07807	0	0	0	1	0	0	0	0	0	1	1	1	1	0	0	0	1	4	0	CHEF
chr8	101522262	101522670	chr15	36468370	36470370	200041495	2.02976	1.63978	1	1	1	0	0	0	0	0	0	3	0	0	1	0	0	0	1	2	0	CHEF
chr14	36911970	36912922	chr12	56458314	56460314	400012057	2.01875	1.09958	0	1	1	0	0	0	0	0	0	2	0	1	1	0	1	0	1	4	0	CHEF
chr3	66848402	66848957	chr6	94951301	94953301	500026720	2.00847	2.6383	1	1	1	0	0	0	0	0	0	3	1	1	1	0	1	0	1	5	0	CHEF
chr4	173995111	173996116	chr8	57740729	57742729	500031280	2.00687	5.09309	0	0	1	0	0	0	0	0	0	1	1	1	1	0	1	0	1	5	0	CHEF
chr1	120678485	120679057	chr3	97938776	97940776	400002133	2.00271	0.908248	0	0	0	0	0	0	0	0	1	1	0	1	1	0	1	0	1	4	0	CHEF
chr7	131580831	131581516	chr6	31883900	31885900	400039586	1.99839	2.58039	0	1	0	0	0	0	0	0	0	1	1	1	1	0	0	0	1	4	0	CHEF
chr1	18736817	18737283	chr4	140001219	140003219	300000391	1.99314	3.30351	1	1	1	1	0	0	0	0	0	4	1	0	1	0	0	0	1	3	0	CHEF
chr5	92757156	92757624	chr13	78426878	78428878	300032910	1.99299	2.49064	1	1	0	0	0	0	0	0	0	2	1	1	1	0	0	0	0	3	0	CHEF
chr17	74964971	74965567	chr11	116993305	116995305	400017352	1.99282	4.17574	0	0	0	0	0	0	0	0	1	1	1	0	1	1	1	0	0	4	0	CHEF
chr17	8957910	8958419	chr11	68353944	68355944	500016168	1.99068	2.46475	0	1	0	0	0	0	0	0	0	1	1	1	1	0	1	0	1	5	0	CHEF
chr4	40936630	40937148	chr5	66391049	66393049	400029394	1.99068	1.56946	0	0	1	0	0	0	0	0	0	1	1	0	1	0	1	0	1	4	0	CHEF
chr12	114047748	114048400	chr5	120321697	120323697	500010005	1.98981	7.59409	1	1	1	0	0	0	0	0	0	3	1	1	1	0	1	0	1	5	0	CHEF
chr8	80875661	80876181	chr3	8865384	8867384	300041161	1.98092	1.64046	0	1	1	0	0	0	0	0	0	2	0	1	1	0	1	0	0	3	0	CHEF
chr15	58341935	58342410	chr9	71231062	71233062	300013786	1.97536	0.893623	0	1	1	0	0	0	0	0	0	2	0	0	1	0	1	0	1	3	0	CHEF
chr1	145140368	145140907	chr3	97938812	97940812	400002213	1.96649	0.874936	0	0	0	0	0	0	0	0	1	1	0	1	1	0	1	0	1	4	0	CHEF
chr1	113584452	113585743	chr3	104540825	104542825	600002017	1.95086	9.37107	0	0	0	0	0	0	0	0	0	0	1	1	1	1	1	0	1	6	0	CHEF
chr8	30398743	30399564	chr8	33809173	33811173	500040464	1.95086	7.78432	0	0	0	0	0	0	0	0	0	0	1	1	1	0	1	0	1	5	0	CHEF
chr4	62776853	62777532	chr5	81661173	81663173	500029668	1.95086	5.08538	1	1	1	0	0	0	0	0	0	3	1	1	1	0	1	0	1	5	0	CHEF
chr10	10207338	10207816	chr2	7777786	7779786	400004187	1.94301	5.24712	0	0	1	0	0	0	0	0	0	1	1	1	1	0	1	0	0	4	0	CHEF
chr7	131872817	131873335	chr6	32201860	32203860	500039590	1.94183	4.06671	1	1	0	0	0	0	0	0	0	2	1	1	1	0	1	0	1	5	0	CHEF
chr7	54849090	54849595	chr11	16534102	16536102	500038412	1.92872	2.96864	0	0	0	0	1	0	0	0	0	1	1	1	1	0	1	0	1	5	0	CHEF
chr6	163964277	163964748	chr17	10227308	10229308	500037343	1.92339	2.37109	1	0	0	0	0	0	0	0	0	1	1	1	1	0	1	0	1	5	0	CHEF
chr1	6299337	6299808	chr4	152292656	152294656	500000125	1.91714	6.85138	0	0	0	0	0	0	0	0	0	0	1	1	1	0	1	0	1	5	0	CHEF
chr8	38331767	38332260	chr8	25512488	25514488	300040591	1.90686	1.67587	1	1	1	0	0	0	0	0	0	3	1	0	1	0	0	0	1	3	0	CHEF
chr4	148658716	148659268	chr8	77511250	77513250	400030934	1.90686	1.51294	0	0	0	0	0	0	0	0	1	1	0	1	1	0	1	0	1	4	0	CHEF
chr2	104018155	104018630	chr1	41389401	41391401	300021414	1.90627	2.77191	1	1	0	0	0	0	0	0	0	2	1	0	1	0	1	0	0	3	0	CHEF
chr5	165592581	165593474	chr11	38067118	38069118	400034179	1.9022	0.951447	0	1	0	0	0	0	0	0	0	1	0	1	1	0	1	0	1	4	0	CHEF
chr9	13491115	13492384	chr4	81627230	81629230	500042370	1.89512	5.27281	0	1	1	0	0	0	0	0	0	2	1	1	1	0	1	0	1	5	0	CHEF
chr8	81191836	81192364	chr3	9100705	9102705	400041173	1.8906	3.13908	0	0	0	0	1	0	0	0	0	1	0	1	1	0	1	0	1	4	0	CHEF
chr3	69337346	69337826	chr6	97395814	97397814	400026749	1.88862	1.91262	1	1	0	0	0	0	0	0	0	2	1	1	1	0	1	0	0	4	0	CHEF
chr3	180425580	180426082	chr3	33872601	33874601	500028419	1.88716	3.22532	1	1	1	0	0	0	0	0	0	3	1	1	1	0	1	0	1	5	0	CHEF
chr8	102006384	102006872	chr15	36826642	36828642	500041507	1.88359	1.54837	0	0	0	1	0	0	0	0	1	2	1	1	1	0	1	0	1	5	0	CHEF
chr17	69028662	69029874	chr11	111843176	111845176	500017237	1.88024	1.39086	1	1	1	0	0	0	1	0	1	5	1	1	1	0	1	0	1	5	0	CHEF
chr20	22410576	22411056	chr2	147904849	147906849	500023903	1.87276	1.0217	0	1	1	1	0	0	0	0	0	3	1	1	1	0	1	0	1	5	0	CHEF
chr2	180414900	180415383	chr2	77505541	77507541	500022582	1.87124	1.95619	1	0	1	0	0	0	0	0	0	2	1	1	1	0	1	0	1	5	0	CHEF
chr11	128402521	128403006	chr9	32684917	32686917	500008106	1.86995	1.38285	1	1	1	0	0	0	0	0	0	3	1	1	1	0	1	0	1	5	0	CHEF
chr2	145325230	145325853	chr2	45157598	45159598	500021965	1.85489	1.20244	1	1	1	0	0	0	0	0	0	3	1	1	1	0	1	0	1	5	0	CHEF
chr5	31161813	31162213	chr15	13211476	13213476	300031989	1.85403	1.41138	0	1	1	0	0	0	0	0	0	2	0	0	1	0	1	0	1	3	0	CHEF
chr20	21070734	21071134	chr2	146822584	146824584	200023878	1.85209	3.39259	1	1	1	0	0	0	0	0	0	3	0	0	1	0	1	0	0	2	0	CHEF
chr3	134660656	134661078	chr9	102204169	102206169	300027682	1.836	1.21224	1	1	1	0	0	0	0	0	0	3	1	0	1	0	0	0	1	3	0	CHEF
chr9	23907234	23907775	chr4	91447107	91449107	300042541	1.83216	1.86027	1	1	1	0	0	0	0	0	0	3	1	1	0	0	1	0	0	3	0	CHEF
chr22	28066137	28067054	chr5	111508354	111510354	500025202	1.82512	4.42893	0	0	0	1	0	0	0	0	0	1	0	1	0	1	1	1	1	5	0	CHEF
chr7	67480193	67480683	chr5	133674828	133676828	300038517	1.82381	1.62136	1	1	1	0	0	0	0	0	0	3	1	0	1	0	0	0	1	3	0	CHEF
chr2	222545243	222545710	chr1	77629071	77631071	200023209	1.81275	1.59085	1	1	1	0	0	0	0	0	0	3	0	0	1	0	1	0	0	2	0	CHEF
chr6	50378210	50378659	chr1	18638494	18640494	200035634	1.81021	1.00313	1	1	1	0	0	0	0	0	0	3	0	0	1	0	0	0	1	2	0	CHEF
chr5	3123802	3124349	chr13	72345043	72347043	500031626	1.80518	4.91427	1	1	1	0	0	0	0	0	0	3	1	1	1	0	1	0	1	5	0	CHEF
chr13	72694716	72695139	chr14	98448774	98450774	300011189	1.79463	2.87423	1	1	1	0	0	0	0	0	0	3	0	0	1	0	1	0	1	3	0	CHEF
chr6	21185974	21186629	chr13	29370176	29372176	500034885	1.79288	4.24689	1	1	1	0	0	0	0	0	0	3	1	1	1	0	1	0	1	5	0	CHEF
chr6	159274267	159275061	chr17	6811972	6813972	600037268	1.78392	8.35114	0	0	0	0	0	0	0	0	0	0	1	1	1	1	1	0	1	6	0	CHEF
chr5	82322300	82323197	chr13	90142779	90144779	400032742	1.77053	6.00585	0	1	1	0	0	0	0	0	0	2	0	1	1	0	1	0	1	4	0	CHEF
chr11	116451479	116452016	chr9	46441960	46443960	500007892	1.7676	1.51233	0	0	1	0	1	0	0	0	0	2	1	1	1	0	1	0	1	5	0	CHEF
chr5	52840722	52842018	chr13	114406014	114408014	500032254	1.76578	4.22351	1	1	1	0	1	0	0	0	0	4	1	1	1	0	1	0	1	5	0	CHEF
chr12	99420404	99420940	chr10	90708718	90710718	500009774	1.75744	1.30832	1	1	1	0	0	0	0	0	0	3	1	1	1	0	1	0	1	5	0	CHEF
chr5	165515302	165515814	chr11	38120468	38122468	500034177	1.75636	1.59085	1	1	1	0	0	0	0	0	0	3	1	1	1	0	1	0	1	5	0	CHEF
chr5	3123092	3123559	chr13	72345675	72347675	200031625	1.756	4.1877	1	1	1	0	0	0	0	0	0	3	0	0	0	0	1	0	1	2	0	CHEF
chr11	120125983	120126449	chr9	43187857	43189857	400007974	1.75385	3.10103	1	0	0	0	0	0	0	0	0	1	1	0	1	0	1	0	1	4	0	CHEF
chr1	160139123	160140149	chr1	172240120	172242120	600002583	1.75034	6.05372	0	0	0	0	0	0	0	0	0	0	1	1	1	0	1	1	1	6	0	CHEF
chr8	108507196	108507646	chr15	42673214	42675214	400041621	1.74994	3.95835	1	1	0	0	0	0	0	0	0	2	1	0	1	0	1	0	1	4	0	CHEF
chr14	100130367	100130874	chr12	108319838	108321838	500013079	1.74184	3.01536	0	1	0	1	0	0	0	0	1	3	1	1	1	0	1	0	1	5	0	CHEF
chr17	75462226	75462626	chr11	117340446	117342446	200017366	1.7395	5.99132	0	1	0	1	0	0	0	0	0	2	1	0	0	0	0	0	1	2	0	CHEF
chr15	64264842	64265360	chr9	66228105	66230105	400013898	1.73698	3.15866	0	0	1	0	0	0	0	0	0	1	0	1	1	0	1	0	1	4	0	CHEF
chr14	69157962	69158407	chr12	80022422	80024422	200012592	1.73539	1.45343	1	1	1	0	0	0	0	0	0	3	1	0	0	0	0	0	1	2	0	CHEF
chr10	125779991	125780849	chr7	132246525	132248525	300005993	1.73228	6.46173	0	0	1	0	0	0	0	0	0	1	1	0	1	0	1	0	0	3	0	CHEF
chr12	115945627	115946226	chr5	119054705	119056705	600010046	1.72852	3.429	1	1	1	1	0	0	0	0	1	5	1	1	1	0	1	1	1	6	0	CHEF
chr18	37792400	37792868	chr18	28521970	28523970	300018093	1.7267	2.2251	1	0	1	0	0	0	0	0	0	2	0	0	1	0	1	0	1	3	0	CHEF
chr9	135466562	135466967	chr2	28906960	28908960	300043953	1.72034	2.69261	1	1	0	1	1	0	0	0	0	4	1	0	1	0	1	0	0	3	0	CHEF
chr5	53178432	53178975	chr13	114157439	114159439	300032260	1.71798	2.90484	1	1	0	0	0	0	0	0	0	2	1	0	1	0	0	0	1	3	0	CHEF
chr12	124997573	124997993	chr5	125133980	125135980	300010216	1.69393	5.0937	0	0	0	0	1	0	0	0	0	1	1	1	0	0	1	0	0	3	0	CHEF
chr9	119034241	119034832	chr4	65237751	65239751	700043608	1.65117	1.01606	1	1	1	0	0	0	0	0	0	3	1	1	1	1	1	1	1	7	0	CHEF
chr17	30630180	30630652	chr11	80334922	80336922	500016505	1.65109	4.48512	1	1	0	0	0	0	0	0	0	2	1	1	1	0	1	0	1	5	0	CHEF
chr5	87240225	87240721	chr13	84570638	84572638	500032803	1.65052	1.63978	0	1	0	0	0	0	0	0	0	1	1	1	1	0	1	0	1	5	0	CHEF
chr17	29752028	29752557	chr11	79614660	79616660	500016492	1.64466	1.77579	0	0	0	1	0	0	0	0	0	1	1	1	1	0	1	0	1	5	0	CHEF
chr20	55500013	55500709	chr2	172727537	172729537	500024395	1.6412	1.78449	0	0	1	0	1	0	0	0	0	2	1	1	1	0	1	0	1	5	0	CHEF
chr7	122110898	122111314	chr6	23409405	23411405	200039430	1.63938	1.52048	1	1	1	0	0	0	0	0	0	3	1	0	1	0	0	0	0	2	0	CHEF
chr11	125952297	125952701	chr9	35401878	35403878	200008075	1.63896	3.22563	1	1	0	0	0	0	0	0	0	2	1	1	0	0	0	0	0	2	0	CHEF
chr15	93823078	93823778	chr7	73221844	73223844	200014491	1.63155	3.70953	1	1	0	0	0	0	0	0	0	2	0	0	1	0	0	0	1	2	0	CHEF
chr18	33431169	33431688	chr18	24401402	24403402	500018023	1.62998	6.11217	1	1	1	0	0	0	0	0	0	3	1	1	1	0	1	0	1	5	0	CHEF
chr13	40139601	40140138	chr3	53062673	53064673	500010698	1.62572	3.47547	0	0	1	0	0	0	0	0	0	1	1	1	1	0	1	0	1	5	0	CHEF
chr1	64937994	64939041	chr4	100778021	100780021	500001278	1.62078	5.0132	1	0	1	0	0	0	0	0	0	2	1	1	1	0	1	0	1	5	0	CHEF
chr7	25901599	25902601	chr6	51177515	51179515	600037919	1.61712	1.7575	0	0	1	0	0	0	0	0	0	1	1	0	1	1	1	1	1	6	0	CHEF
chr15	89903524	89903956	chr7	79496887	79498887	300014395	1.61245	1.0575	0	1	0	0	0	0	0	0	0	1	0	1	1	0	0	0	1	3	0	CHEF
chr11	78640345	78641066	chr7	96671395	96673395	500007348	1.6109	1.30213	0	0	1	0	0	0	0	0	0	1	1	1	1	0	1	0	1	5	0	CHEF
chr18	38891528	38892536	chr18	29578544	29580544	500018100	1.60659	4.41753	1	0	0	0	0	0	0	0	0	1	1	1	1	0	1	0	1	5	0	CHEF
chr4	20574626	20575145	chr5	48262665	48264665	300029124	1.60637	2.1015	0	1	0	0	0	0	0	0	0	1	0	0	1	0	1	0	1	3	0	CHEF
chr1	162167874	162168284	chr1	170476888	170478888	300002649	1.60419	3.23021	1	1	1	0	0	0	0	0	0	3	1	0	1	0	0	0	1	3	0	CHEF
chr1	213843655	213844144	chr1	190447291	190449291	500003467	1.5906	1.64874	0	0	1	0	1	0	0	0	0	2	1	1	1	0	1	0	1	5	0	CHEF
chr16	51392871	51393470	chr8	89244322	89246322	500015349	1.58594	1.89293	0	0	1	0	0	0	0	0	0	1	1	1	1	0	1	0	1	5	0	CHEF
chr11	79184123	79184603	chr7	96168163	96170163	500007359	1.58306	4.97108	1	0	0	0	0	0	0	0	0	1	1	1	1	0	1	0	1	5	0	CHEF
chr20	62808219	62808665	chr2	181772687	181774687	300024508	1.58031	3.02242	1	0	0	0	0	0	0	0	0	1	1	1	1	0	0	0	0	3	0	CHEF
chr1	74710802	74711263	chr3	155038158	155040158	500001437	1.56766	0.771952	0	0	1	1	0	0	0	0	0	2	1	1	1	0	1	0	1	5	0	CHEF
chr2	176961668	176962193	chr2	74671568	74673568	500022505	1.56646	1.67494	1	1	0	1	1	0	0	0	0	4	1	1	1	0	1	0	1	5	0	CHEF
chr2	43327847	43328400	chr17	84095742	84097742	400020442	1.56422	3.75744	0	0	1	0	1	0	0	0	0	2	1	1	1	0	0	0	1	4	0	CHEF
chr1	40177625	40178089	chr4	123161308	123163308	400000850	1.56069	0.539427	0	0	1	0	0	0	0	0	0	1	1	1	1	0	0	0	1	4	0	CHEF
chr8	64992193	64992663	chr3	17488896	17490896	200040897	1.55936	1.19319	1	1	0	1	0	0	0	0	0	3	1	1	0	0	0	0	0	2	0	CHEF
chr3	62351205	62351695	chr14	12337174	12339174	300026609	1.5553	1.03755	0	0	1	0	0	0	0	0	0	1	0	1	1	0	1	0	0	3	0	CHEF
chr5	137430728	137431593	chr18	34551020	34553020	600033667	1.54222	1.58698	1	1	1	0	0	0	0	0	0	3	1	1	1	1	1	0	1	6	0	CHEF
chr3	77735640	77736240	chr16	73862915	73864915	300026895	1.52474	2.16788	0	1	0	0	0	0	0	0	0	1	0	0	1	0	1	0	1	3	0	CHEF
chr4	113680368	113680997	chr3	127453958	127455958	500030446	1.52353	7.3919	0	0	0	0	0	0	0	0	0	0	1	1	1	0	1	0	1	5	0	CHEF
chr14	57363593	57364219	chr14	48747587	48749587	400012360	1.51156	1.88856	1	0	0	1	0	0	0	0	0	2	1	0	1	0	1	0	1	4	0	CHEF
chr3	70581428	70582432	chr6	98525951	98527951	500026764	1.50466	1.84083	0	1	0	1	0	0	0	0	0	2	1	1	1	0	1	0	1	5	0	CHEF
chr2	157449482	157449938	chr2	57377577	57379577	300022146	1.50253	2.06517	1	0	1	0	0	0	0	0	0	2	1	0	1	0	1	0	0	3	0	CHEF
chr2	145201902	145202391	chr2	45036808	45038808	300021954	1.49041	1.64337	1	1	1	0	0	0	0	0	0	3	0	0	1	0	1	0	1	3	0	CHEF
chr5	158296087	158296533	chr11	44840946	44842946	300034076	1.49005	1.41935	1	1	0	0	0	0	0	0	0	2	1	1	0	0	1	0	0	3	0	CHEF
chr8	59977276	59978190	chr4	6944328	6946328	500040823	1.48057	3.51272	1	1	1	0	0	0	0	0	0	3	1	1	1	0	1	0	1	5	0	CHEF
chr16	59203910	59204498	chr8	96295891	96297891	500015471	1.47793	3.68658	0	1	0	0	0	0	0	0	0	1	1	1	1	0	1	0	1	5	0	CHEF
chr6	24980975	24981886	chr13	24564968	24566968	600034966	1.47657	7.29923	0	0	0	0	0	0	0	0	0	0	1	1	1	1	1	0	1	6	0	CHEF
chr10	21570342	21571445	chr2	17851548	17853548	500004376	1.47356	5.94616	1	1	0	0	0	0	0	0	0	2	1	1	1	0	1	0	1	5	0	CHEF
chr16	68766551	68766999	chr8	106599062	106601062	300015612	1.46654	4.30166	1	1	0	0	0	0	0	0	0	2	0	0	1	0	1	0	1	3	0	CHEF
chr4	10497746	10498352	chr5	38708092	38710092	500028985	1.45845	2.16737	1	0	0	0	0	0	0	0	0	1	1	1	1	0	1	0	1	5	0	CHEF
chr3	29517310	29517795	chr9	117071385	117073385	500026047	1.44833	4.50877	1	1	0	0	0	0	0	0	0	2	1	1	1	0	1	0	1	5	0	CHEF
chr20	15986179	15986928	chr2	142334064	142336064	400023789	1.4436	2.38072	1	0	0	0	0	0	0	0	0	1	0	1	1	0	1	0	1	4	0	CHEF
chr6	106452900	106453355	chr10	44514994	44516994	300036346	1.4436	1.43566	1	0	1	0	0	0	0	0	0	2	0	0	1	0	1	0	1	3	0	CHEF
chr15	93374896	93375379	chr7	73594341	73596341	500014475	1.44354	3.5876	0	0	1	0	0	0	0	0	0	1	1	0	1	0	1	1	1	5	0	CHEF
chr1	23924525	23925384	chr4	136104154	136106154	600000511	1.44304	7.14899	0	0	0	0	0	0	0	0	1	1	1	1	1	0	1	1	1	6	0	CHEF
chr13	72259157	72259684	chr14	98021511	98023511	500011173	1.43702	0.95285	0	0	1	0	0	0	0	0	0	1	1	1	1	0	1	0	1	5	0	CHEF
chr6	41523087	41523822	chr17	47914150	47916150	300035495	1.43552	1.88684	1	1	1	0	0	0	0	0	0	3	1	0	1	0	0	0	1	3	0	CHEF
chr16	88448166	88448694	chr8	122228199	122230199	300015937	1.43354	1.98855	1	1	1	0	0	0	0	0	0	3	1	0	1	0	1	0	0	3	0	CHEF
chr5	50690415	50690861	chr13	116297208	116299208	500032220	1.4308	0.90144	0	0	0	0	0	0	0	0	1	1	1	1	1	0	1	0	1	5	0	CHEF
chr15	53096922	53097386	chr9	74847502	74849502	300013704	1.42162	2.62664	1	1	1	0	0	0	0	0	0	3	1	0	1	0	1	0	0	3	0	CHEF
chr4	85299990	85300587	chr5	101537154	101539154	500029974	1.40931	3.1044	1	1	1	0	0	0	0	0	0	3	1	1	1	0	1	0	1	5	0	CHEF
chr5	163925301	163925799	chr11	39595763	39597763	500034153	1.40913	2.86533	1	1	0	0	0	0	0	0	0	2	1	1	1	0	1	0	1	5	0	CHEF
chr10	102401965	102402395	chr19	44658543	44660543	400005587	1.407	1.8199	0	0	0	1	0	0	0	0	0	1	1	0	1	0	1	0	1	4	0	CHEF
chr17	69824233	69824880	chr11	112501000	112503000	600017242	1.40372	2.90127	1	1	0	0	0	0	0	0	0	2	1	1	1	0	1	1	1	6	0	CHEF
chr12	83150122	83150577	chr10	105508343	105510343	400009517	1.40034	0.72689	0	0	1	0	0	0	0	0	0	1	1	0	1	0	1	0	1	4	0	CHEF
chr9	126625312	126625913	chr2	38222614	38224614	500043733	1.39347	2.12245	0	1	0	0	0	0	0	0	0	1	1	1	1	0	1	0	1	5	0	CHEF
chr22	28583598	28584079	chr5	111169637	111171637	400025216	1.39347	1.07781	1	1	0	0	0	0	0	0	0	2	1	1	1	0	0	0	1	4	0	CHEF
chr3	137486124	137486859	chr9	99871897	99873897	400027727	1.38542	1.18348	1	1	1	0	0	0	0	0	0	3	1	1	1	0	0	0	1	4	0	CHEF
chr8	20126062	20126771	chr8	69148421	69150421	500040294	1.38092	5.4698	0	0	1	0	0	0	0	0	0	1	1	1	1	0	1	0	1	5	0	CHEF
chr7	27131215	27132146	chr6	52153279	52155279	500037941	1.38081	1.32989	1	1	1	0	0	0	0	0	0	3	1	1	1	0	1	0	1	5	0	CHEF
chr20	22559620	22560136	chr2	148039857	148041857	500023910	1.37328	1.94717	1	1	1	0	1	0	0	0	0	4	1	1	1	0	0	1	1	5	0	CHEF
chr7	41722109	41722563	chr13	16032302	16034302	400038224	1.36444	1.38483	0	0	1	0	0	0	0	0	0	1	0	1	1	0	1	0	1	4	0	CHEF
chr13	100356039	100356743	chr14	122266822	122268822	400011549	1.36233	6.35642	1	1	1	0	0	0	0	0	0	3	1	0	1	0	1	0	1	4	0	CHEF
chr18	11261085	11261539	chr18	63495131	63497131	400017705	1.35842	1.22329	1	0	0	0	0	0	0	0	0	1	0	1	1	0	1	0	1	4	0	CHEF
chr15	59645947	59646668	chr9	70222539	70224539	500013806	1.35103	5.51992	1	0	1	0	0	0	0	0	0	2	1	1	1	0	1	0	1	5	0	CHEF
chr7	67382105	67382556	chr5	133717106	133719106	300038516	1.34017	2.71925	1	1	0	0	0	0	0	0	0	2	0	0	1	0	1	0	1	3	0	CHEF
chr12	122439391	122439950	chr5	123323512	123325512	300010165	1.33517	1.62468	0	0	1	0	0	0	0	0	0	1	1	1	1	0	0	0	0	3	0	CHEF
chr18	49716988	49717439	chr18	72562080	72564080	300018244	1.33085	1.43613	1	0	0	0	0	0	0	0	0	1	1	0	1	0	1	0	0	3	0	CHEF
chr9	37339784	37340206	chr4	44919982	44921982	400042716	1.32201	1.01215	1	1	1	0	0	0	0	0	0	3	1	0	1	0	1	0	1	4	0	CHEF
chr10	104325508	104325998	chr19	46434760	46436760	400005640	1.32187	0.686832	0	1	1	0	1	0	0	0	0	3	1	1	1	0	0	0	1	4	0	CHEF
chr9	110234926	110235621	chr4	55518823	55520823	500043479	1.31308	2.26448	1	0	0	0	0	0	0	0	0	1	1	1	1	0	1	0	1	5	0	CHEF
chr5	87083324	87083924	chr13	84751462	84753462	500032800	1.31028	1.39215	0	1	1	0	0	0	0	0	0	2	1	1	1	0	1	0	1	5	0	CHEF
chr5	79481301	79481867	chr13	92678193	92680193	300032700	1.30832	10.832	0	0	0	0	0	0	0	0	0	0	0	0	1	0	1	0	1	3	0	CHEF
chr2	6209466	6209866	chr12	27064172	27066172	200019892	1.30383	0.968549	1	1	1	0	0	0	0	0	0	3	1	0	0	0	0	0	1	2	0	CHEF
chr16	61906231	61906965	chr8	99249209	99251209	400015503	1.29394	4.46135	0	0	1	0	0	0	0	0	0	1	1	0	1	0	1	0	1	4	0	CHEF
chr11	27817789	27818250	chr2	109578301	109580301	400006571	1.28461	0.895245	1	1	1	0	0	0	0	0	0	3	0	1	1	0	1	0	1	4	0	CHEF
chr3	71924679	71925115	chr6	99803605	99805605	300026805	1.28022	4.06364	0	0	1	0	0	0	0	0	0	1	0	1	1	0	0	0	1	3	0	CHEF
chr12	94092994	94093653	chr10	95301235	95303235	400009663	1.27961	4.21214	0	1	1	0	0	0	0	0	0	2	0	1	1	0	1	0	1	4	0	CHEF
chr5	116150334	116151170	chr18	47607965	47609965	300033282	1.27882	4.17891	0	1	0	0	0	0	0	0	0	1	1	1	0	0	0	0	1	3	0	CHEF
chr3	35785950	35786386	chr9	112117513	112119513	200026165	1.27783	0.832131	1	1	1	0	0	0	0	0	0	3	1	0	1	0	0	0	0	2	0	CHEF
chr9	128517615	128518110	chr2	34362910	34364910	500043796	1.27305	2.93932	1	0	0	0	0	0	0	0	0	1	1	1	1	0	1	0	1	5	0	CHEF
chr12	76352713	76353432	chr10	111559260	111561260	400009394	1.26945	4.06699	0	1	1	0	0	0	0	0	0	2	1	1	0	0	1	0	1	4	0	CHEF
chr11	128654283	128654775	chr9	32449151	32451151	500008114	1.26504	2.12898	1	1	1	0	0	0	0	0	0	3	1	1	1	0	1	0	1	5	0	CHEF
chr12	114025426	114025951	chr5	120337182	120339182	600010004	1.26454	7.69777	0	0	0	1	0	0	0	0	1	2	1	1	1	0	1	1	1	6	0	CHEF
chr10	44866393	44866873	chr6	117179389	117181389	500004700	1.26232	4.06776	1	1	0	0	0	0	0	0	0	2	1	1	1	0	1	0	1	5	0	CHEF
chr5	113647625	113648080	chr18	45501136	45503136	400033240	1.2432	2.15817	1	1	0	0	0	0	0	0	0	2	1	1	0	0	1	0	1	4	0	CHEF
chr6	76044249	76044851	chr9	79829986	79831986	500035910	1.24146	5.58465	1	1	1	0	0	0	0	0	0	3	1	1	1	0	1	0	1	5	0	CHEF
chr5	116199825	116200765	chr18	47646687	47648687	500033286	1.23959	7.18695	1	0	0	0	0	0	0	0	0	1	1	1	1	0	1	0	1	5	0	CHEF
chr2	105488614	105489137	chr1	42712517	42714517	300021437	1.23864	1.47969	1	0	1	0	0	0	0	0	0	2	1	0	1	0	0	0	1	3	0	CHEF
chr2	210384037	210384509	chr1	66264910	66266910	500023028	1.23671	0.844377	0	1	1	0	0	0	0	0	0	2	1	1	1	0	1	0	1	5	0	CHEF
chr6	166610689	166611174	chr17	8413573	8415573	300037373	1.23269	0.865823	1	1	0	0	0	0	0	0	0	2	1	0	1	0	0	0	1	3	0	CHEF
chr13	28539633	28540749	chr5	147303243	147305243	600010511	1.23225	1.03367	1	0	1	0	0	0	0	0	0	2	1	1	1	0	1	1	1	6	0	CHEF
chr5	87959730	87960850	chr13	83740276	83742276	500032816	1.2306	0.860143	0	1	1	0	0	0	0	0	0	2	1	1	1	0	1	0	1	5	0	CHEF
chr10	2617644	2618055	chr13	7268633	7270633	400004086	1.22559	1.26132	1	0	1	0	0	0	0	0	0	2	1	1	0	0	1	0	1	4	0	CHEF
chr16	72756439	72756939	chr8	109011798	109013798	500015683	1.21558	2.15728	0	1	1	0	0	0	0	0	0	2	1	1	1	0	1	0	1	5	0	CHEF
chr17	46237228	46238319	chr11	96732018	96734018	500016838	1.19945	1.85365	1	1	0	0	0	0	0	0	0	2	1	1	1	0	1	0	1	5	0	CHEF
chr1	118617006	118617428	chr3	100033203	100035203	300002094	1.19441	1.14959	1	1	0	0	0	0	0	0	0	2	0	0	1	0	1	0	1	3	0	CHEF
chr4	174013004	174013545	chr8	57722616	57724616	400031281	1.19272	2.75081	0	0	1	0	0	0	0	0	0	1	1	1	1	0	1	0	0	4	0	CHEF
chr15	58356211	58356663	chr9	71216370	71218370	500013787	1.19054	0.575871	0	1	1	0	0	0	0	0	0	2	1	1	1	0	1	0	1	5	0	CHEF
chr13	46343121	46343608	chr14	75540255	75542255	500010806	1.19026	3.26427	1	0	0	0	0	0	0	0	0	1	1	1	1	0	1	0	1	5	0	CHEF
chr3	38682375	38682868	chr9	119570543	119572543	400026212	1.18217	1.53742	0	1	1	1	0	0	0	0	1	4	0	1	1	1	0	0	1	4	0	CHEF
chr20	37911226	37911686	chr2	159068404	159070404	400024131	1.18142	1.19009	1	0	1	0	0	0	0	0	1	3	1	1	1	0	1	0	0	4	0	CHEF
chr12	90277491	90278157	chr10	98748559	98750559	500009605	1.17725	1.80152	1	1	1	0	0	0	0	0	1	4	1	1	1	0	1	0	1	5	0	CHEF
chr16	8420351	8420804	chr16	8187075	8189075	400014817	1.17199	1.74718	0	1	0	0	0	0	0	0	0	1	1	0	1	0	1	0	1	4	0	CHEF
chr5	79480029	79480579	chr13	92679048	92681048	300032699	1.17052	10.7459	0	0	0	0	0	0	0	0	0	0	1	0	1	0	0	0	1	3	0	CHEF
chr5	151387162	151387576	chr11	55684119	55686119	200033960	1.16897	0.951615	1	1	0	0	0	0	0	0	0	2	1	0	1	0	0	0	0	2	0	CHEF
chr2	145202723	145203185	chr2	45037637	45039637	500021955	1.16617	2.00134	0	1	1	0	0	0	0	0	0	2	1	1	1	0	1	0	1	5	0	CHEF
chr1	216913634	216914131	chr1	187982307	187984307	500003526	1.16406	2.5308	0	1	0	0	0	0	0	0	0	1	1	1	1	0	1	0	1	5	0	CHEF
chr7	20835427	20835936	chr12	118837727	118839727	400037808	1.15708	2.6033	0	1	0	0	0	0	0	0	1	2	0	1	1	0	1	0	1	4	0	CHEF
chr1	47674027	47674533	chr4	115078801	115080801	300000982	1.14793	1.16188	0	0	1	0	0	0	0	0	0	1	1	1	1	0	0	0	0	3	0	CHEF
chr7	131289435	131290937	chr6	31599994	31601994	600039581	1.14229	9.33122	0	0	0	0	0	0	0	0	0	0	1	1	1	1	1	0	1	6	0	CHEF
chr2	177610303	177610969	chr2	75245320	75247320	300022526	1.11935	4.08552	1	0	0	0	0	0	0	0	0	1	1	0	1	0	1	0	0	3	0	CHEF
chr1	38836604	38837146	chr4	124359394	124361394	300000815	1.11784	3.86743	1	1	1	1	0	0	0	0	0	4	1	0	1	0	1	0	0	3	0	CHEF
chr16	5978583	5979160	chr16	5816353	5818353	500014780	1.1127	1.70093	0	0	0	0	0	0	0	0	1	1	1	1	1	0	1	0	1	5	0	CHEF
chr16	20186492	20187246	chr7	119278525	119280525	500015037	1.10962	2.48456	0	0	0	1	0	0	0	0	0	1	1	1	1	0	1	0	1	5	0	CHEF
chr7	78207855	78208474	chr5	20114247	20116247	500038721	1.0985	7.16714	1	0	0	0	0	0	0	0	0	1	1	1	1	0	1	0	1	5	0	CHEF
chr9	119048540	119048971	chr4	65251428	65253428	500043611	1.09316	1.73827	1	1	1	0	0	0	0	0	0	3	1	1	1	0	1	0	1	5	0	CHEF
chr3	31051421	31051885	chr9	115801546	115803546	500026079	1.09155	1.00313	0	0	0	1	0	0	0	0	0	1	1	1	1	0	1	0	1	5	0	CHEF
chr15	57551729	57552260	chr9	71860847	71862847	400013768	1.08381	1.74468	0	0	1	0	0	0	0	0	0	1	1	1	1	0	1	0	0	4	0	CHEF
chr10	123048737	123049265	chr7	129987200	129989200	500005937	1.07979	4.77598	0	0	0	0	1	0	0	0	0	1	1	1	1	0	1	0	1	5	0	CHEF
chr6	38477555	38477982	chr17	30464100	30466100	400035443	1.06849	1.56946	0	0	0	0	0	0	0	0	1	1	1	0	1	0	1	0	1	4	0	CHEF
chr8	68418773	68419259	chr1	10476049	10478049	300040955	1.0656	1.51472	0	1	1	0	0	0	0	0	0	2	0	1	0	0	1	0	1	3	0	CHEF
chr12	99256869	99257342	chr10	90863072	90865072	300009773	1.06169	1.32021	0	0	1	1	0	0	0	0	0	2	1	0	1	0	1	0	0	3	0	CHEF
chr1	29282565	29283078	chr4	132024839	132026839	300000650	1.05308	0.978703	1	0	0	0	0	0	0	0	0	1	0	1	0	0	1	0	1	3	0	CHEF
chr1	40176313	40176766	chr4	123162218	123164218	500000849	1.05101	0.647574	0	0	1	0	0	0	0	0	0	1	1	1	1	0	0	1	1	5	0	CHEF
chr1	147039513	147040113	chr3	97269106	97271106	500002260	1.05046	4.00731	1	0	0	0	0	0	0	0	1	2	1	1	1	0	1	0	1	5	0	CHEF
chr17	35088091	35088500	chr11	84696767	84698767	200016562	1.04772	1.69461	1	1	0	0	0	0	0	0	0	2	1	0	1	0	0	0	0	2	0	CHEF
chr8	25894778	25895241	chr14	67241290	67243290	400040380	1.04286	0.941303	1	1	0	0	0	0	0	0	0	2	1	1	1	0	1	0	0	4	0	CHEF
chr15	60410399	60411253	chr9	69669492	69671492	400013825	1.04006	3.51272	1	0	1	0	0	0	0	0	0	2	1	0	1	0	1	0	1	4	0	CHEF
chr11	126979671	126980167	chr9	34381422	34383422	200008094	1.03661	2.49741	1	1	1	0	0	0	0	0	0	3	1	0	1	0	0	0	0	2	0	CHEF
chr14	76604855	76605554	chr12	86219809	86221809	400012741	1.03455	1.52768	0	0	1	0	1	0	0	0	0	2	1	0	1	0	1	0	1	4	0	CHEF
chr5	72739789	72740293	chr13	98357730	98359730	500032557	1.03163	0.847955	1	1	0	0	0	0	0	0	0	2	1	1	1	0	1	0	1	5	0	CHEF
chr2	77245226	77245740	chr6	80544085	80546085	400021033	1.02927	1.23777	1	0	0	0	0	0	0	0	0	1	0	1	1	0	1	0	1	4	0	CHEF
chr12	66289795	66290348	chr10	120416337	120418337	200009255	1.02553	8.19127	0	0	0	0	0	0	0	0	1	1	0	1	0	0	1	0	0	2	0	CHEF
chr3	145436863	145437373	chr9	92929715	92931715	400027859	1.01344	0.88	1	1	0	0	0	0	0	0	0	2	1	1	1	0	1	0	0	4	0	CHEF
chr11	20268970	20269681	chr7	49677448	49679448	400006485	1.00499	1.09762	1	1	1	0	0	0	0	0	1	4	1	1	1	0	1	0	0	4	0	CHEF
chr6	108987994	108988515	chr10	42194258	42196258	400036407	1.0046	2.37889	0	0	0	0	0	0	0	0	1	1	1	1	1	0	0	0	1	4	0	CHEF
chr11	64333820	64334324	chr19	6568756	6570756	400007064	0.99683	3.22435	1	0	0	0	0	0	0	0	0	1	1	1	1	0	0	0	1	4	0	CHEF
chr3	144102398	144102846	chr9	94133243	94135243	400027843	0.993221	1.19355	1	1	0	0	0	0	0	0	0	2	1	0	1	0	1	0	1	4	0	CHEF
chr7	78029264	78029749	chr5	20324445	20326445	400038716	0.985042	3.06272	1	1	1	0	0	0	0	0	0	3	0	1	1	0	1	0	1	4	0	CHEF
chr12	23793234	23794170	chr6	143940303	143942303	500008589	0.976379	3.68747	0	1	0	0	0	0	0	0	0	1	1	1	1	0	1	0	1	5	0	CHEF
chr5	77312987	77313421	chr13	94544913	94546913	500032659	0.971919	0.676421	1	1	1	0	0	0	0	0	0	3	1	1	1	0	1	0	1	5	0	CHEF
chr18	47967734	47968216	chr18	74168829	74170829	300018222	0.966764	1.09958	0	0	1	0	0	0	0	0	0	1	0	1	1	0	0	0	1	3	0	CHEF
chr11	14251456	14251883	chr7	114003409	114005409	200006376	0.964713	2.14418	1	1	1	0	0	0	0	0	0	3	1	0	1	0	0	0	0	2	0	CHEF
chr10	77235167	77235652	chr14	22057888	22059888	500005186	0.960367	1.7312	1	1	1	0	0	0	0	0	0	3	1	1	1	0	1	0	1	5	0	CHEF
chr7	121564316	121564743	chr6	22922093	22924093	500039410	0.95895	1.56108	1	1	0	0	0	0	0	0	0	2	1	1	1	0	1	0	1	5	0	CHEF
chr6	85620542	85620970	chr9	87893313	87895313	300036036	0.943275	1.20439	1	1	0	0	0	0	0	0	0	2	1	0	1	0	0	0	1	3	0	CHEF
chr6	118240929	118241422	chr10	52703659	52705659	400036578	0.931184	1.24947	1	0	1	0	1	0	0	0	0	3	1	0	1	0	1	0	1	4	0	CHEF
chr1	214200380	214200822	chr1	190130535	190132535	300003475	0.918243	1.7977	1	0	0	0	0	0	0	0	0	1	1	0	1	0	0	0	1	3	0	CHEF
chr8	9244111	9244546	chr8	35142510	35144510	300040138	0.911117	1.01878	1	0	0	0	0	0	0	0	0	1	1	0	1	0	0	0	1	3	0	CHEF
chr2	220430187	220430661	chr1	75499699	75501699	500023175	0.910695	4.44921	0	0	0	1	0	0	0	0	0	1	1	1	1	0	1	0	1	5	0	CHEF
chr16	52775345	52775755	chr8	90519450	90521450	200015377	0.909629	2.67409	1	1	1	0	0	0	0	0	0	3	1	0	0	0	1	0	0	2	0	CHEF
chr2	175203804	175204390	chr2	73275431	73277431	300022468	0.908787	0.804325	1	1	1	0	0	0	0	0	0	3	0	0	1	0	1	0	1	3	0	CHEF
chr13	101162317	101163228	chr14	122871140	122873140	400011583	0.908339	6.34794	0	0	1	0	0	0	0	0	0	1	0	1	1	0	1	0	1	4	0	CHEF
chr6	139948222	139948704	chr10	17490193	17492193	300036957	0.898424	2.27933	0	1	0	0	0	0	0	0	0	1	1	0	1	0	0	0	1	3	0	CHEF
chr1	183994210	183994683	chr1	152413829	152415829	500002997	0.897491	0.999909	0	0	1	0	0	0	0	0	0	1	1	1	1	0	1	0	1	5	0	CHEF
chr16	60240453	60240908	chr8	97396137	97398137	300015484	0.893001	1.69056	1	1	1	0	0	0	0	0	0	3	1	0	1	0	0	0	1	3	0	CHEF
chr2	206747765	206748177	chr1	62926612	62928612	300022955	0.887998	1.30929	0	1	0	0	0	0	0	0	0	1	1	1	0	0	0	0	1	3	0	CHEF
chr3	28119046	28119472	chr9	118254979	118256979	200026025	0.886756	1.24525	1	1	1	0	0	0	0	0	0	3	0	0	1	0	1	0	0	2	0	CHEF
chr2	223133897	223134342	chr1	78167155	78169155	200023226	0.88432	1.097	1	1	1	0	0	0	0	0	0	3	0	0	1	0	0	0	1	2	0	CHEF
chr21	44579384	44579829	chr17	31669335	31671335	300024951	0.879751	1.97239	0	0	1	0	0	0	0	0	0	1	0	1	1	0	1	0	0	3	0	CHEF
chr10	98210497	98211059	chr19	41163410	41165410	500005528	0.877069	5.00093	1	1	0	0	0	0	0	0	0	2	1	1	1	0	1	0	1	5	0	CHEF
chr18	57054065	57054543	chr18	66021866	66023866	400018357	0.872106	1.32543	0	0	1	0	0	0	0	0	0	1	0	1	1	0	1	0	1	4	0	CHEF
chr11	121911294	121911738	chr9	41636115	41638115	400008004	0.870921	1.82679	0	0	1	0	0	0	0	0	0	1	0	1	1	0	1	0	1	4	0	CHEF
chr9	32345144	32345673	chr4	40105082	40107082	400042630	0.869999	5.05726	0	1	1	0	0	0	0	0	0	2	1	0	1	0	1	1	0	4	0	CHEF
chr11	2714490	2714986	chr7	143288253	143290253	500006179	0.84582	5.0869	1	0	0	0	0	0	0	0	0	1	1	1	1	0	1	0	1	5	0	CHEF
chr2	6905053	6905601	chr12	26541615	26543615	400019902	0.844862	2.78168	1	1	0	0	0	0	0	0	0	2	1	0	1	0	1	0	1	4	0	CHEF
chr10	77177188	77177778	chr14	22004069	22006069	500005182	0.830593	0.616575	1	1	1	1	0	0	0	0	0	4	1	1	1	0	1	0	1	5	0	CHEF
chr1	96987667	96988366	chr3	119946900	119948900	400001810	0.828798	3.26401	0	1	0	0	0	0	0	0	0	1	1	1	1	0	1	0	0	4	0	CHEF
chrY	10037641	10038056	chr18	73532425	73534425	300045412	0.802862	0.634787	1	0	1	0	1	0	0	0	0	3	1	1	1	0	0	0	0	3	0	CHEF
chr5	167474890	167475346	chr11	36219624	36221624	300034227	0.753039	1.7833	0	1	1	0	0	0	0	0	0	2	0	1	1	0	0	0	1	3	0	CHEF
chr6	139717012	139717647	chr10	17704710	17706710	600036950	0.740834	1.07446	0	0	1	0	0	0	0	0	0	1	1	1	1	0	1	1	1	6	0	CHEF
chr16	79087424	79087882	chr8	115198359	115200359	200015793	0.740283	2.14774	1	1	1	0	0	0	0	0	0	3	1	0	1	0	0	0	0	2	0	CHEF
chr3	78396330	78396779	chr16	73229704	73231704	300026906	0.712572	3.74131	0	1	0	0	0	0	0	0	0	1	1	0	1	0	1	0	0	3	0	CHEF
chr6	157410411	157410923	chr17	5246391	5248391	400037240	0.702641	2.04342	0	0	0	0	1	0	0	0	0	1	0	1	1	0	1	0	1	4	0	CHEF
chr6	98484146	98484638	chr4	23612204	23614204	400036236	0.702138	3.62858	1	0	0	0	0	0	0	0	0	1	1	1	1	0	1	0	0	4	0	CHEF
chr2	74253458	74254018	chr6	83421089	83423089	300020992	0.694047	5.50163	1	1	1	1	0	0	0	0	0	4	1	0	1	0	0	0	1	3	0	CHEF
chr2	121832349	121833249	chr1	118776316	118778316	500021691	0.684599	1.96463	1	0	0	0	0	0	0	0	0	1	1	1	1	0	1	0	1	5	0	CHEF
chr19	30864396	30864873	chr7	37625043	37627043	400019197	0.669732	1.67172	1	1	1	0	0	0	0	0	0	3	1	1	1	0	1	0	0	4	0	CHEF
chr13	100449962	100450439	chr14	122323328	122325328	500011553	0.665423	3.60072	0	0	1	0	0	0	0	0	0	1	1	1	1	0	1	0	1	5	0	CHEF
chr9	89555697	89556177	chr13	60170128	60172128	500043151	0.658733	1.20772	1	1	0	0	0	0	0	0	0	2	1	1	1	0	1	0	1	5	0	CHEF
chr3	64734068	64734688	chr6	93004588	93006588	400026671	0.651387	2.23182	0	0	1	0	0	0	0	0	0	1	1	0	1	0	1	0	1	4	0	CHEF
chr2	45172846	45173322	chr17	85624119	85626119	400020489	0.640479	1.51124	1	1	1	0	0	0	0	0	0	3	1	0	1	0	1	0	1	4	0	CHEF
chr2	215458356	215458860	chr1	70901612	70903612	400023092	0.639359	0.725644	0	0	0	0	0	0	0	0	1	1	1	0	1	0	1	0	1	4	0	CHEF
chr20	57244562	57245530	chr2	174092003	174094003	500024423	0.635911	8.84605	0	0	0	0	1	0	0	0	0	1	1	1	1	0	1	0	1	5	0	CHEF
chr13	43715168	43715573	chr14	77791821	77793821	200010762	0.625812	2.09244	1	1	0	0	0	0	0	0	0	2	1	1	0	0	0	0	0	2	0	CHEF
chr1	9313051	9313593	chr4	149987887	149989887	400000206	0.614513	2.76069	0	0	1	0	1	0	0	0	0	2	0	1	1	0	1	0	1	4	0	CHEF
chr16	76017677	76018119	chr8	112268184	112270184	300015751	0.598328	0.948115	0	1	1	0	0	0	0	0	0	2	0	0	1	0	1	0	1	3	0	CHEF
chr9	114474630	114475042	chr4	59063571	59065571	400043539	0.588792	1.00757	0	0	0	0	1	0	0	0	0	1	1	0	1	0	1	0	1	4	0	CHEF
chr17	26242642	26243173	chr11	78806851	78808851	500016409	0.579248	0.865686	0	0	1	0	0	0	0	0	0	1	1	1	1	0	1	0	1	5	0	CHEF
chr7	96630937	96631642	chr6	6858604	6860604	500039023	0.578143	1.49264	1	0	0	0	0	0	0	0	0	1	1	1	1	0	1	1	0	5	0	CHEF
chr1	58472266	58472763	chr4	103837574	103839574	400001138	0.578034	4.26266	1	1	0	0	0	0	0	0	0	2	1	1	1	0	1	0	0	4	0	CHEF
chr1	58066095	58066551	chr4	104213909	104215909	500001129	0.575969	3.36086	1	0	0	0	0	0	0	0	0	1	1	1	1	0	1	0	1	5	0	CHEF
chr9	124016387	124016934	chr2	35240086	35242086	400043693	0.542997	1.06064	0	0	0	1	0	0	0	0	0	1	1	1	0	0	1	0	1	4	0	CHEF
chr6	50685811	50686252	chr1	19106506	19108506	300035637	0.464491	1.12779	0	1	0	0	0	0	0	0	0	1	1	0	1	0	0	0	1	3	0	CHEF
chr2	42319185	42319997	chr17	83268053	83270053	500020420	0.4175	0.815228	0	0	0	0	0	0	0	0	1	1	1	1	1	0	1	0	1	5	0	CHEF
chr2	188273628	188274074	chr2	84391853	84393853	500022674	0.409845	2.82162	0	0	1	0	0	0	0	0	0	1	1	1	1	0	1	0	1	5	0	CHEF
chr15	74583602	74584135	chr9	58060201	58062201	400014140	0.393451	1.14252	0	0	1	0	0	0	0	0	0	1	1	0	1	0	1	0	1	4	0	CHEF
chr5	173097072	173097611	chr11	31711991	31713991	500034314	0.389041	11.2495	0	0	0	0	0	0	0	0	0	0	1	1	1	0	1	0	1	5	0	CHEF
chr14	57849841	57850393	chr14	49154773	49156773	300012377	0.354941	1.01878	1	0	1	0	0	0	0	0	0	2	1	0	1	0	0	0	1	3	0	CHEF
chr3	10501771	10502467	chr6	113851708	113853708	400025758	0.196848	0.884857	1	0	0	0	0	0	0	0	0	1	1	1	1	1	0	0	0	4	0	CHEF
chr12	62996976	62997269	chr10	122984845	122986845	100009192	32.8518	6.87029	0	0	1	0	1	0	0	0	0	2	0	0	0	0	0	1	0	1	1	CMEF
chr15	93352313	93352888	chr7	73617406	73619406	200014471	31.3681	5.08012	0	0	1	1	1	1	0	0	1	5	0	0	0	1	0	1	0	2	1	CMEF
chr1	26947135	26947786	chr4	133812796	133814796	200000595	29.7776	4.12905	0	0	1	0	1	1	0	1	1	5	1	0	0	0	0	1	0	2	1	CMEF
chr12	62996108	62996373	chr10	122985443	122987443	100009191	28.338	6.58693	0	0	1	0	0	0	0	0	0	1	0	0	0	0	0	1	0	1	1	CMEF
chrX	136656463	136656635	chrX	58037554	58039554	100045197	27.7483	6.39323	0	0	1	1	1	0	0	0	0	3	0	0	0	0	0	0	1	1	1	CMEF
chrX	136656700	136656958	chrX	58037822	58039822	100045198	27.7198	6.90801	0	0	1	1	1	0	0	0	0	3	0	0	0	0	0	0	1	1	1	CMEF
chrX	53710761	53711585	chrX	151802268	151804268	100044567	27.0621	3.36581	0	0	1	0	1	0	0	0	0	2	0	0	0	1	0	0	0	1	1	CMEF
chr12	31477127	31477375	chr6	148943878	148945878	100008727	26.3929	6.68526	0	0	1	0	1	0	0	0	0	2	0	0	0	0	0	0	1	1	1	CMEF
chrX	31250665	31251004	chrX	85078385	85080385	100044373	25.3338	1.22573	0	0	0	0	0	0	0	0	0	0	0	0	0	0	1	0	0	1	1	CMEF
chr17	4851215	4851409	chr11	70653105	70655105	100016066	23.9634	7.52446	0	0	1	0	1	0	0	0	0	2	0	0	0	1	0	0	0	1	1	CMEF
chr11	65189652	65190014	chr19	5844915	5846915	100007083	23.8556	6.94592	1	0	1	1	1	1	0	0	0	5	0	0	0	1	0	0	0	1	1	CMEF
chr15	79166458	79166717	chr9	90112378	90114378	100014238	23.8267	5.42218	0	0	1	0	1	1	0	0	0	3	0	0	0	0	1	0	0	1	1	CMEF
chr3	72496205	72496447	chr6	100286312	100288312	100026820	23.6105	3.70847	0	0	1	0	1	1	0	0	0	3	0	0	0	0	0	1	0	1	1	CMEF
chr2	232478406	232479280	chr1	86441392	86443392	200023375	23.2978	5.68093	0	0	1	0	1	0	0	0	0	2	0	0	0	0	0	1	1	2	1	CMEF
chrX	38663334	38663595	chrX	10716517	10718517	100044419	22.5743	4.12891	0	0	1	0	1	0	0	0	0	2	0	0	0	0	0	0	1	1	1	CMEF
chr16	67597217	67597661	chr8	105636531	105638531	100015589	22.389	6.52763	0	0	1	0	0	0	0	0	0	1	0	0	0	0	0	1	0	1	1	CMEF
chr6	26197677	26197974	chr13	23574474	23576474	100035003	22.0812	4.40927	0	0	0	0	0	0	0	0	0	0	0	0	0	0	0	0	1	1	1	CMEF
chr9	73033083	73033483	chr19	23135783	23137783	100042897	21.9347	3.02242	0	0	0	0	0	1	0	0	1	2	1	0	0	0	0	0	0	1	1	CMEF
chr11	65266145	65266617	chr19	5801796	5803796	200007088	21.4461	6.54652	0	1	0	1	0	0	0	0	1	3	0	0	0	0	1	1	0	2	1	CMEF
chr22	41417921	41418269	chr15	81521772	81523772	100025458	21.3569	6.45521	0	0	1	0	1	1	0	0	0	3	0	0	0	1	0	0	0	1	1	CMEF
chr4	74122992	74123714	chr5	90364016	90366016	200029794	21.1924	2.55246	0	0	1	0	0	0	0	0	0	1	0	0	0	0	1	0	1	2	1	CMEF
chr5	39073386	39073637	chr15	6708327	6710327	100032108	21.1032	4.49256	0	0	0	0	0	0	0	0	0	0	0	0	0	0	1	0	0	1	1	CMEF
chr5	90674389	90674801	chr13	80886430	80888430	200032876	21.0824	2.73699	0	0	0	0	0	0	0	0	0	0	1	0	0	0	1	0	0	2	1	CMEF
chr6	146134429	146134742	chr10	11281484	11283484	100037065	21.0256	2.31927	0	0	0	0	0	0	0	0	0	0	0	0	0	0	1	0	0	1	1	CMEF
chr7	128170279	128171652	chr11	105180192	105182192	300039521	21.0093	4.4562	0	0	1	0	1	0	0	0	1	3	0	0	0	1	0	1	1	3	1	CMEF
chr2	232545477	232545840	chr1	86502968	86504968	100023379	20.8718	8.30342	0	1	1	0	1	0	0	0	0	3	0	0	0	0	0	1	0	1	1	CMEF
chr1	150534463	150534909	chr3	95673388	95675388	200002379	20.8499	6.11906	0	0	0	1	0	1	0	1	0	3	0	0	0	1	0	1	0	2	1	CMEF
chr1	16162316	16162760	chr4	141544996	141546996	100000320	20.6937	5.67098	0	1	1	1	1	0	0	0	0	4	0	0	0	0	1	0	0	1	1	CMEF
chr17	29058294	29058666	chr11	79991937	79993937	200016480	20.6154	2.98092	0	0	1	0	1	0	0	0	0	2	0	0	0	1	0	0	1	2	1	CMEF
chr12	46765174	46765417	chr15	96697932	96699932	100008918	20.4649	3.78513	0	0	1	0	1	0	0	0	0	2	0	0	0	0	0	0	1	1	1	CMEF
chr17	36858486	36858810	chr11	97659393	97661393	100016610	20.2287	1.39419	0	0	0	0	0	0	0	0	0	0	0	0	0	1	0	0	0	1	1	CMEF
chrX	41150584	41150984	chrX	13240361	13242361	100044452	19.981	2.78961	1	0	0	0	0	0	0	0	0	1	0	0	1	0	0	0	0	1	1	CMEF
chr2	61763764	61764035	chr11	23256486	23258486	100020754	19.8714	7.03993	0	0	1	0	0	1	0	0	0	2	0	0	0	0	0	0	1	1	1	CMEF
chr6	163836920	163837153	chr17	10317286	10319286	100037341	19.7162	4.25112	0	0	0	0	0	0	0	0	0	0	0	0	0	1	0	0	0	1	1	CMEF
chr6	151711374	151711923	chr10	4386021	4388021	200037147	19.6884	9.36695	0	0	1	0	1	1	0	0	0	3	0	0	0	1	0	1	0	2	1	CMEF
chr17	2302977	2303240	chr11	74831222	74833222	100016020	19.5834	3.73055	0	0	1	0	1	0	0	0	1	3	0	0	0	0	0	1	0	1	1	CMEF
chr20	46413293	46413491	chr2	166153206	166155206	100024253	19.543	1.6878	0	0	0	0	1	0	0	0	0	1	0	0	0	0	0	1	0	1	1	CMEF
chr6	89791423	89791659	chr4	33246671	33248671	100036090	19.1647	4.52477	0	0	1	0	1	0	0	0	0	2	0	0	0	0	1	0	0	1	1	CMEF
chr16	85363224	85363449	chr8	120334838	120336838	200015884	19.1434	3.93603	0	1	1	0	0	0	0	0	0	2	0	0	0	0	1	0	1	2	1	CMEF
chr11	65186420	65186860	chr19	5847223	5849223	200007082	19.1392	5.70626	0	0	0	1	0	0	0	0	0	1	0	0	0	0	1	1	0	2	1	CMEF
chr12	49453572	49453871	chr15	98870361	98872361	100008969	19.0349	5.70992	0	0	0	0	1	0	0	0	0	1	0	0	0	0	0	0	1	1	1	CMEF
chr19	13961973	13962357	chr8	84191166	84193166	100018972	19.0237	3.44437	0	0	1	0	1	1	0	0	0	3	0	0	0	1	0	0	0	1	1	CMEF
chr13	98628893	98629268	chr14	120910377	120912377	100011508	18.9528	7.35467	0	0	1	0	1	0	0	0	0	2	0	0	0	0	0	1	0	1	1	CMEF
chr10	88517294	88517563	chr14	34500712	34502712	100005351	18.8793	7.64907	0	0	0	0	1	0	0	0	0	1	0	0	0	0	1	0	0	1	1	CMEF
chr3	159480034	159480397	chr3	68491659	68493659	100028115	18.7966	3.28686	0	0	0	1	0	1	0	0	1	3	0	0	0	1	0	0	0	1	1	CMEF
chr15	93446936	93447911	chr7	73537077	73539077	500014480	18.7938	3.33415	0	0	1	0	1	1	0	0	0	3	0	0	1	1	1	1	1	5	1	CMEF
chr1	185015670	185015830	chr1	151498860	151500860	100003018	18.7288	1.78955	0	0	0	0	1	0	0	0	0	1	0	0	0	0	0	0	1	1	1	CMEF
chr9	71737266	71737666	chr19	24223272	24225272	100042879	18.7245	4.15158	0	0	1	0	1	0	0	0	1	3	0	0	1	0	0	0	0	1	1	CMEF
chr17	42295783	42296061	chr11	102315726	102317726	100016754	18.6475	6.45872	0	0	0	0	1	0	0	0	0	1	0	0	0	1	0	0	0	1	1	CMEF
chr6	52528925	52529360	chr11	51605516	51607516	200035658	18.6234	1.93108	0	0	1	0	1	0	0	0	0	2	0	0	0	1	0	1	0	2	1	CMEF
chr2	232511062	232511466	chr1	86472136	86474136	100023376	18.4681	1.512	0	0	0	0	1	0	0	0	0	1	0	0	1	0	0	0	0	1	1	CMEF
chr6	119217647	119217980	chr10	53598032	53600032	100036595	18.421	1.75509	0	0	0	0	0	0	0	0	0	0	0	0	0	0	1	0	0	1	1	CMEF
chr12	49626737	49626926	chr15	98990306	98992306	100008974	18.4091	1.20439	0	1	0	1	0	1	0	0	1	4	0	0	0	0	0	0	1	1	1	CMEF
chrX	47092796	47093031	chrX	20703420	20705420	100044504	18.3495	3.42453	0	0	1	0	0	0	0	0	0	1	0	0	0	0	0	1	0	1	1	CMEF
chr1	54953888	54954333	chr4	106839136	106841136	200001081	18.3152	5.43749	0	0	1	0	1	0	0	0	0	2	0	0	0	0	1	0	1	2	1	CMEF
chr11	65264735	65265361	chr19	5802703	5804703	100007087	18.2781	7.02856	0	1	1	1	1	1	0	0	1	6	0	0	0	0	0	1	0	1	1	CMEF
chr2	55843626	55843820	chr11	29172991	29174991	100020672	18.269	3.20788	0	0	0	0	0	0	0	0	0	0	0	0	0	0	0	0	1	1	1	CMEF
chr22	41419035	41419323	chr15	81522810	81524810	100025459	18.2484	3.44792	0	0	1	0	1	1	0	0	0	3	0	0	0	0	0	0	1	1	1	CMEF
chr5	76102018	76102359	chr13	95534643	95536643	200032623	18.1379	4.53164	1	0	1	0	0	0	0	0	0	2	0	0	0	0	1	0	1	2	1	CMEF
chr11	74461058	74461278	chr7	99978236	99980236	100007277	18.0719	2.30171	0	0	0	0	0	0	0	0	0	0	0	0	0	0	0	0	1	1	1	CMEF
chr6	26204487	26204920	chr13	23530046	23532046	100035005	17.9548	6.41086	0	0	1	0	0	0	1	0	0	2	0	0	0	0	0	1	0	1	1	CMEF
chr5	16742183	16742604	chr15	25751848	25753848	200031806	17.947	5.3363	0	0	0	0	0	0	0	0	0	0	0	0	0	0	0	0	1	1	1	CMEF
chr11	32915581	32916085	chr2	104814706	104816706	100006644	17.9354	8.86702	0	0	1	0	1	0	0	0	0	2	0	0	0	0	1	0	0	1	1	CMEF
chr15	56536416	56536779	chr9	72530724	72532724	100013746	17.8674	8.1749	0	0	1	0	1	0	0	0	1	3	0	0	0	0	0	0	1	1	1	CMEF
chr19	47363462	47363772	chr7	16614341	16616341	100019517	17.8338	4.3237	0	0	1	0	1	0	0	0	0	2	0	0	0	1	0	0	0	1	1	CMEF
chr17	7141062	7141277	chr11	69996410	69998410	100016107	17.8106	4.09786	0	0	1	0	1	0	0	0	0	2	0	0	0	0	0	0	1	1	1	CMEF
chr2	232526808	232527275	chr1	86486600	86488600	200023377	17.678	2.78173	1	1	1	0	1	1	0	0	1	6	0	0	0	1	0	1	0	2	1	CMEF
chr12	57855037	57855308	chr10	127339385	127341385	100009138	17.6632	5.7878	0	0	0	1	1	0	0	0	0	2	0	0	0	0	1	0	0	1	1	CMEF
chr7	131347304	131347540	chr1	63176232	63178232	100039582	17.4958	2.02632	0	0	1	0	1	1	0	0	0	3	0	0	0	0	0	0	1	1	1	CMEF
chr8	21907724	21908153	chr14	70633806	70635806	100040319	17.4925	1.11516	0	1	1	0	0	1	1	0	0	4	0	0	0	0	0	0	1	1	1	CMEF
chr20	2083138	2083402	chr2	129800263	129802263	100023586	17.4551	5.37169	0	0	0	0	1	0	0	0	0	1	0	0	0	0	0	0	1	1	1	CMEF
chr17	36413291	36413705	chr11	97279730	97281730	200016596	17.3976	1.91832	0	0	0	0	1	0	0	0	0	1	0	0	0	1	0	1	0	2	1	CMEF
chr2	65662819	65663184	chr11	19919600	19921600	100020855	17.3109	3.02164	1	0	1	1	1	0	0	0	0	4	0	0	0	0	0	1	0	1	1	CMEF
chr13	45009150	45009658	chr14	76505059	76507059	200010779	17.1494	3.06021	0	0	1	0	1	0	0	0	1	3	1	0	0	0	0	1	0	2	1	CMEF
chr20	50414138	50414561	chr2	168761818	168763818	200024309	17.0783	4.57206	0	0	0	0	0	0	0	0	0	0	0	0	1	0	1	0	0	2	1	CMEF
chr17	27276282	27276520	chr11	77983871	77985871	100016440	17.0583	7.50188	0	0	0	0	1	0	0	0	0	1	0	0	0	0	0	0	1	1	1	CMEF
chr2	65663758	65663999	chr11	19919092	19921092	100020856	17.0329	2.59611	1	0	1	1	1	0	0	0	0	4	0	0	0	0	0	0	1	1	1	CMEF
chr17	47091760	47092023	chr11	95989864	95991864	100016876	16.9938	3.72038	0	0	1	0	1	0	0	0	0	2	0	0	0	0	1	0	0	1	1	CMEF
chr1	16494244	16494526	chr4	141290798	141292798	100000331	16.9251	3.64505	1	0	1	1	1	1	0	0	1	6	0	0	0	0	0	0	1	1	1	CMEF
chr19	13265577	13266386	chr8	84659967	84661967	200018960	16.8923	7.061	0	0	0	0	0	0	0	0	1	1	0	0	0	0	0	1	1	2	1	CMEF
chr6	26032246	26032686	chr13	23751208	23753208	100034991	16.8814	6.13642	0	0	0	0	0	0	0	0	0	0	0	0	0	0	1	0	0	1	1	CMEF
chr2	129120392	129120851	chr1	36016433	36018433	300021774	16.7731	3.76299	0	0	0	0	0	0	0	0	0	0	0	0	1	0	1	1	0	3	1	CMEF
chr17	47090633	47091308	chr11	95990573	95992573	200016875	16.7391	3.97967	0	0	1	0	1	0	0	0	0	2	0	0	0	0	1	1	0	2	1	CMEF
chr3	32822934	32823357	chr9	114582966	114584966	100026109	16.7217	4.76895	1	1	1	0	1	1	1	0	0	6	0	0	0	1	0	0	0	1	1	CMEF
chr7	32930033	32930289	chr6	56795690	56797690	100038076	16.6478	2.53328	0	0	0	0	0	0	0	0	0	0	0	0	0	0	0	0	1	1	1	CMEF
chr6	29617793	29618034	chr17	37027791	37029791	100035218	16.6311	3.01325	0	0	0	0	0	0	0	0	0	0	0	0	0	0	0	0	1	1	1	CMEF
chr16	51188031	51188496	chr8	89044468	89046468	100015342	16.6087	2.10459	0	0	0	0	0	0	0	0	0	0	0	0	1	0	0	0	0	1	1	CMEF
chr13	27826905	27827305	chr5	146832704	146834704	100010500	16.5699	4.59606	0	0	0	0	1	0	0	0	0	1	0	0	1	0	0	0	0	1	1	CMEF
chr9	96928093	96929248	chr13	48545327	48547327	300043275	16.5277	5.17902	0	0	1	0	1	0	0	0	0	2	0	0	0	1	1	0	1	3	1	CMEF
chr12	96792925	96793199	chr10	93160713	93162713	100009723	16.4683	2.83625	0	0	1	0	1	0	0	0	0	2	0	0	0	0	1	0	0	1	1	CMEF
chrX	24042930	24043210	chrX	94234323	94236323	100044297	16.2899	2.5912	0	0	1	0	1	0	0	0	0	2	0	0	0	0	0	1	0	1	1	CMEF
chr1	16126727	16127005	chr4	141570585	141572585	100000317	16.2296	2.03808	0	0	0	1	0	1	0	0	0	2	0	0	0	0	0	0	1	1	1	CMEF
chr1	27902458	27902851	chr4	133037545	133039545	100000625	16.1516	4.71074	1	0	0	0	1	0	0	0	0	2	0	0	0	0	0	1	0	1	1	CMEF
chr12	46776659	46777329	chr15	96708659	96710659	200008921	16.1079	5.46729	0	0	1	0	1	0	0	0	0	2	0	0	0	0	1	1	0	2	1	CMEF
chr12	53764992	53765382	chr15	102398750	102400750	200009050	16.0868	3.43043	0	0	1	0	1	1	0	0	0	3	0	0	0	1	0	1	0	2	1	CMEF
chr12	90103946	90104254	chr10	98912773	98914773	100009602	16.0494	1.49114	0	0	0	0	1	0	0	0	0	1	0	0	0	0	0	1	0	1	1	CMEF
chr15	90118397	90118846	chr7	79659147	79661147	100014405	16.0334	3.65081	0	0	1	0	1	0	0	0	0	2	0	0	1	0	0	0	0	1	1	CMEF
chr5	16738281	16738542	chr15	25755222	25757222	100031804	15.9652	5.26658	0	0	0	0	0	0	0	0	0	0	0	0	0	0	1	0	0	1	1	CMEF
chr16	85364373	85364716	chr8	120336071	120338071	100015885	15.9236	1.28039	0	0	0	0	0	0	0	0	0	0	0	0	0	0	0	0	1	1	1	CMEF
chr9	97101007	97101407	chr4	135872081	135874081	100043278	15.9196	1.05192	0	0	1	0	1	0	0	0	0	2	0	1	0	0	0	0	0	1	1	CMEF
chr10	46913823	46914040	chr5	24841453	24843453	100004716	15.819	1.02732	0	0	1	0	1	0	0	0	0	2	0	0	0	0	0	1	0	1	1	CMEF
chr10	47395840	47396190	chr5	24841455	24843455	100004722	15.8134	1.25241	0	0	1	0	1	0	0	0	0	2	0	0	0	0	0	1	0	1	1	CMEF
chr19	12904356	12904694	chr8	84975560	84977560	100018939	15.7992	2.40677	0	0	1	0	1	1	0	1	0	4	0	0	0	0	0	1	0	1	1	CMEF
chr16	51147691	51148030	chr8	89005667	89007667	100015340	15.7732	1.26835	0	1	1	0	1	0	0	0	0	3	0	0	0	0	0	0	1	1	1	CMEF
chr5	126114039	126114359	chr18	56708036	56710036	100033501	15.7622	4.57158	0	0	0	0	0	0	0	0	0	0	0	0	0	0	0	1	0	1	1	CMEF
chr13	50656007	50656372	chr14	61647843	61649843	200010869	15.7208	3.97293	0	0	1	0	1	0	0	0	0	2	0	0	0	0	1	1	0	2	1	CMEF
chr1	44015974	44016262	chr4	118271309	118273309	100000903	15.6963	4.17414	0	0	0	0	0	0	0	0	0	0	0	0	0	0	0	1	0	1	1	CMEF
chr6	114179521	114180230	chr10	37136548	37138548	200036507	15.6962	3.90247	0	0	1	0	1	0	0	0	1	3	0	0	0	0	0	1	1	2	1	CMEF
chr11	67895689	67895966	chr19	3841556	3843556	100007158	15.6889	5.86548	1	0	1	1	0	1	1	0	1	6	0	0	0	0	0	1	0	1	1	CMEF
chr1	205600124	205600708	chr1	132007276	132009276	200003321	15.6695	4.2653	0	0	1	0	1	0	0	0	0	2	0	0	0	0	1	0	1	2	1	CMEF
chr3	185825535	185825974	chr16	22437694	22439694	100028536	15.5823	2.08353	0	0	1	0	1	0	0	0	0	2	0	0	1	0	0	0	0	1	1	CMEF
chr7	32929812	32930022	chr6	56795453	56797453	100038075	15.4302	2.0833	0	0	0	0	0	0	0	0	0	0	0	0	0	0	0	0	1	1	1	CMEF
chr6	26286509	26286995	chr13	23529440	23531440	100035016	15.4211	3.36952	0	0	0	0	0	0	0	0	0	0	0	0	0	0	1	0	0	1	1	CMEF
chr6	26033932	26034168	chr13	23749970	23751970	100034992	15.4188	6.10635	0	0	0	0	0	0	0	0	0	0	0	0	0	0	1	0	0	1	1	CMEF
chr4	183369600	183370199	chr8	48554503	48556503	300031415	15.3822	3.00879	0	0	1	0	1	1	0	0	0	3	0	0	0	0	1	1	1	3	1	CMEF
chr17	4300226	4300541	chr11	72575396	72577396	100016053	15.343	5.68213	1	1	1	0	0	0	0	0	0	3	0	0	0	0	0	1	0	1	1	CMEF
chr12	98896960	98898282	chr10	91180831	91182831	300009761	15.2961	3.53128	0	0	1	0	1	1	0	0	0	3	0	0	0	1	1	0	1	3	1	CMEF
chr17	36412163	36412411	chr11	97278691	97280691	100016595	15.287	2.76711	0	0	1	0	1	0	0	0	1	3	0	0	0	0	0	0	1	1	1	CMEF
chr3	129118425	129118730	chr6	115808066	115810066	100027580	15.2604	2.20845	0	0	1	0	1	0	0	0	0	2	0	0	0	0	0	0	1	1	1	CMEF
chr16	89555502	89555726	chr8	123040118	123042118	100015955	15.2597	5.52507	0	0	0	0	1	0	0	0	0	1	0	0	0	0	1	0	0	1	1	CMEF
chr19	36337245	36337506	chr7	30464259	30466259	100019286	15.2278	1.01992	0	1	1	1	0	0	0	0	0	3	0	0	0	0	1	0	0	1	1	CMEF
chr7	155303650	155304076	chr5	28209975	28211975	100039968	15.2232	0.643688	0	0	0	0	0	0	0	0	0	0	0	0	1	0	0	0	0	1	1	CMEF
chr9	99680964	99681364	chr4	135871991	135873991	100043333	15.2098	1.10571	0	0	0	0	1	0	0	0	0	1	0	0	1	0	0	0	0	1	1	CMEF
chr5	98265174	98265574	chr17	15703504	15705504	200033003	15.1833	2.33927	0	0	1	0	1	0	0	0	0	2	0	0	1	0	0	0	1	2	1	CMEF
chr2	64978297	64978485	chr11	20541936	20543936	100020833	15.1571	4.01451	0	0	1	0	1	1	0	0	0	3	0	0	0	0	1	0	0	1	1	CMEF
chr5	72113477	72113734	chr13	98924413	98926413	100032544	15.1192	2.13535	0	0	0	0	0	0	0	0	0	0	0	0	0	0	0	0	1	1	1	CMEF
chr13	41323110	41323537	chr8	22426656	22428656	200010717	15.1149	1.58977	1	0	0	0	1	0	0	0	0	2	0	0	1	0	1	0	0	2	1	CMEF
chr13	21843009	21843409	chr8	22426689	22428689	200010397	15.105	0.941187	1	0	0	0	1	0	0	0	0	2	0	0	1	0	0	0	1	2	1	CMEF
chr6	86388413	86388598	chr9	88521952	88523952	100036046	15.0247	5.29175	0	1	1	0	1	0	0	0	0	3	0	0	0	0	0	0	1	1	1	CMEF
chr4	78079175	78079746	chr5	93267395	93269395	100029865	14.9908	3.31986	0	0	0	0	1	0	0	0	1	2	0	0	0	0	0	1	0	1	1	CMEF
chr7	5633743	5634146	chr5	142960957	142962957	100037579	14.9786	5.72827	0	1	1	0	1	1	0	0	0	4	0	0	0	0	0	0	1	1	1	CMEF
chr6	79786526	79786932	chr9	82973223	82975223	200035963	14.9375	4.48622	0	0	1	0	0	0	0	0	0	1	1	0	0	0	0	0	1	2	1	CMEF
chr4	111117392	111117723	chr3	129533322	129535322	100030391	14.8826	5.21151	0	0	0	0	1	0	0	0	0	1	0	0	0	0	0	1	0	1	1	CMEF
chr12	7000128	7000504	chr6	124804769	124806769	100008338	14.8731	3.96917	0	0	1	0	1	0	0	0	0	2	0	0	0	1	0	0	0	1	1	CMEF
chr17	43661892	43662306	chr11	107130562	107132562	100016792	14.8332	5.00133	0	0	1	0	1	1	0	0	0	3	0	0	0	0	0	1	0	1	1	CMEF
chr18	3593963	3594192	chr17	70754464	70756464	100017556	14.7908	3.45607	0	0	0	0	0	0	0	0	1	1	0	0	0	0	1	0	0	1	1	CMEF
chr4	119199594	119199939	chr3	123507396	123509396	100030513	14.7894	4.45614	0	0	1	0	1	0	0	0	0	2	0	0	0	0	1	0	0	1	1	CMEF
chr17	55993807	55994067	chr11	88138376	88140376	100017028	14.7836	2.0047	0	1	1	1	0	0	0	0	0	3	0	0	0	0	0	0	1	1	1	CMEF
chr1	44015595	44015969	chr4	118271630	118273630	100000902	14.7755	4.33928	0	0	0	0	0	0	0	0	0	0	0	0	0	0	0	1	0	1	1	CMEF
chr5	133339564	133339971	chr11	52360719	52362719	100033597	14.7381	4.43728	0	0	1	0	1	0	0	0	0	2	0	0	0	0	0	1	0	1	1	CMEF
chr7	4784348	4784812	chr5	142439502	142441502	300037559	14.6846	0.939117	0	0	1	0	1	1	0	0	0	3	0	0	1	0	1	0	1	3	1	CMEF
chr13	50365397	50365817	chr14	61437804	61439804	100010865	14.6795	3.56651	0	0	0	0	1	0	0	0	0	1	0	0	1	0	0	0	0	1	1	CMEF
chr8	61593025	61593285	chr4	8691195	8693195	100040845	14.6769	2.02893	0	0	0	0	1	0	0	0	0	1	0	0	0	0	0	1	0	1	1	CMEF
chr19	16187982	16188371	chr8	72134908	72136908	100019007	14.6406	6.70561	0	0	1	0	1	0	0	0	0	2	0	0	0	0	0	1	0	1	1	CMEF
chr14	90849447	90849987	chr12	100186671	100188671	300012939	14.609	4.58939	0	0	1	0	1	0	0	0	1	3	0	0	0	0	1	1	1	3	1	CMEF
chr1	157989262	157989662	chr3	87149790	87151790	100002552	14.5732	5.88764	0	0	1	0	0	0	0	0	1	2	0	0	1	0	0	0	0	1	1	CMEF
chr16	4321128	4321465	chr16	4557075	4559075	100014729	14.573	5.90743	0	0	1	0	0	0	0	0	0	1	0	0	0	0	0	1	0	1	1	CMEF
chr17	29035521	29036125	chr8	83898930	83900930	100016479	14.545	7.77753	0	0	0	0	1	0	0	0	1	2	0	0	0	0	0	1	0	1	1	CMEF
chr1	167191452	167191661	chr1	166000287	166002287	100002745	14.5052	5.78591	0	0	0	0	0	0	0	0	0	0	0	0	0	0	0	0	1	1	1	CMEF
chr10	65027512	65027780	chr10	67186091	67188091	100004963	14.5048	6.80009	0	0	0	0	0	0	0	0	0	0	0	0	0	0	1	0	0	1	1	CMEF
chr13	50656547	50656793	chr14	61648251	61650251	100010870	14.4785	3.2658	0	0	1	0	1	0	0	0	0	2	0	0	0	0	1	0	0	1	1	CMEF
chr5	89704449	89704709	chr13	81782936	81784936	100032849	14.4783	4.31188	0	0	1	0	1	0	0	0	0	2	0	0	0	0	0	0	1	1	1	CMEF
chr12	132380660	132380971	chr5	110807441	110809441	100010343	14.4774	2.58541	0	0	1	0	0	0	0	0	0	1	0	0	0	0	0	1	0	1	1	CMEF
chr1	150582189	150582607	chr3	95653890	95655890	100002383	14.3865	1.86902	0	0	0	0	0	0	0	0	0	0	0	0	1	0	0	0	0	1	1	CMEF
chr1	200331636	200331905	chr1	136676081	136678081	100003195	14.3854	4.73478	0	0	0	0	0	0	0	0	0	0	0	0	0	0	1	0	0	1	1	CMEF
chr8	103875250	103875495	chr15	38517325	38519325	100041554	14.3401	6.29252	0	0	1	0	1	0	0	0	0	2	0	0	0	0	1	0	0	1	1	CMEF
chr10	114711550	114711951	chr19	55742525	55744525	100005797	14.3038	9.67911	0	0	0	0	1	0	0	0	0	1	0	0	0	0	1	0	0	1	1	CMEF
chr1	33225715	33226039	chr4	129231300	129233300	200000722	14.289	6.46533	0	0	1	1	0	0	0	0	0	2	0	0	0	1	0	1	0	2	1	CMEF
chrX	119620085	119620388	chrX	38473198	38475198	100045050	14.2585	1.46969	0	0	0	0	0	0	0	0	0	0	0	0	0	0	0	0	1	1	1	CMEF
chr10	105041550	105041950	chr19	47018604	47020604	200005661	14.2134	1.39086	0	0	0	0	0	0	0	0	0	0	0	0	1	0	0	0	1	2	1	CMEF
chr15	75742616	75742900	chr9	57076538	57078538	100014171	14.1098	1.85777	0	0	1	0	1	1	0	0	0	3	0	0	0	0	0	0	1	1	1	CMEF
chr13	20126659	20126878	chr8	22426829	22428829	100010369	14.0955	0.921799	1	0	0	0	0	0	0	0	0	1	0	0	0	0	0	0	1	1	1	CMEF
chr6	144904403	144904660	chr10	12613696	12615696	100037044	14.0282	2.61784	1	1	1	0	0	0	0	0	0	3	0	0	0	0	1	0	0	1	1	CMEF
chr1	27024661	27024944	chr4	133750697	133752697	100000598	14.0218	4.16662	0	0	0	0	0	0	0	0	0	0	0	0	0	0	1	0	0	1	1	CMEF
chr1	150533492	150533733	chr3	95674945	95676945	100002378	14.0155	5.05921	0	0	0	0	0	0	0	0	0	0	0	0	0	0	0	1	0	1	1	CMEF
chr7	129419735	129419974	chr6	30172913	30174913	100039542	13.9666	3.52595	0	0	1	0	1	0	0	0	0	2	0	0	0	0	0	0	1	1	1	CMEF
chr9	98267319	98268337	chr13	63561765	63563765	300043297	13.9542	4.2143	0	0	0	0	1	0	0	0	0	1	1	0	0	0	1	0	1	3	1	CMEF
chr18	3466811	3467233	chr17	70833675	70835675	200017550	13.9219	2.64534	0	0	1	0	1	0	0	0	0	2	0	0	1	0	0	0	1	2	1	CMEF
chr6	26272912	26273218	chr13	23532705	23534705	100035013	13.9164	6.53542	0	0	0	0	0	0	0	0	0	0	0	0	0	0	1	0	0	1	1	CMEF
chr1	16141893	16142298	chr4	141559125	141561125	200000318	13.8767	1.50985	0	0	0	0	0	0	0	0	1	1	1	0	1	0	0	0	0	2	1	CMEF
chr4	53578349	53578735	chr5	74092035	74094035	100029520	13.8423	4.00951	0	0	1	0	1	0	0	0	0	2	0	0	0	1	0	0	0	1	1	CMEF
chr1	54954912	54955288	chr4	106838201	106840201	100001082	13.8372	5.13241	0	0	1	0	1	0	0	0	0	2	0	0	0	0	0	1	0	1	1	CMEF
chr6	26271221	26271890	chr13	23534526	23536526	200035012	13.8153	6.21912	0	0	0	0	0	0	0	0	0	0	0	0	0	0	1	0	1	2	1	CMEF
chr17	14989591	14989991	chr11	63270368	63272368	100016248	13.8081	1.39483	1	1	1	1	0	0	0	0	1	5	1	0	0	0	0	0	0	1	1	CMEF
chr17	74553519	74554048	chr11	116670622	116672622	100017340	13.7772	5.03498	0	0	0	0	0	0	0	0	0	0	0	0	0	1	0	0	0	1	1	CMEF
chr7	64712639	64712941	chr4	106559819	106561819	100038478	13.7606	1.79635	0	0	1	0	1	0	0	0	0	2	0	0	0	0	1	0	0	1	1	CMEF
chr6	157007782	157008063	chr17	4906632	4908632	100037222	13.7141	3.85644	0	0	1	0	1	0	0	0	1	3	0	0	0	0	0	0	1	1	1	CMEF
chr17	43225009	43226465	chr11	103115125	103117125	300016783	13.7067	4.7758	0	1	0	0	0	0	0	0	0	1	0	0	0	1	1	0	1	3	1	CMEF
chr17	47099732	47100198	chr11	95981650	95983650	300016877	13.6364	5.73935	0	0	0	0	0	0	0	0	0	0	0	0	1	0	1	1	0	3	1	CMEF
chr22	31739282	31739565	chr11	3291816	3293816	100025282	13.4276	3.84333	1	1	1	0	1	1	0	0	1	6	0	0	0	0	1	0	0	1	1	CMEF
chr12	7046921	7047424	chr6	124744727	124746727	100008341	13.3282	4.86528	0	0	1	0	1	0	0	0	0	2	0	0	0	1	0	0	0	1	1	CMEF
chr20	60641402	60641759	chr2	179976146	179978146	100024459	13.314	4.76528	0	0	1	0	1	0	0	0	0	2	0	0	0	0	0	1	0	1	1	CMEF
chr10	21824339	21824844	chr2	18064933	18066933	100004400	13.3068	4.17746	0	0	1	0	1	0	0	0	1	3	0	0	0	0	0	0	1	1	1	CMEF
chr2	183902292	183902532	chr2	80579675	80581675	100022626	13.2896	5.65541	0	0	1	0	1	0	0	0	0	2	0	0	0	0	1	0	0	1	1	CMEF
chr16	51068637	51069037	chr8	88948267	88950267	100015337	13.2357	1.77601	0	0	0	0	0	0	0	0	0	0	1	0	0	0	0	0	0	1	1	CMEF
chr20	24616442	24616842	chr2	149980493	149982493	100023942	13.2315	1.98047	0	0	0	0	0	0	0	0	0	0	1	0	0	0	0	0	0	1	1	CMEF
chr2	131450456	131450710	chr8	72318735	72320735	100021799	13.1796	1.08197	0	0	1	0	1	1	0	0	0	3	0	0	0	0	0	1	0	1	1	CMEF
chr14	77499280	77499710	chr12	86887421	86889421	200012752	13.1778	5.07374	0	0	0	0	0	1	0	0	1	2	0	0	1	0	0	1	0	2	1	CMEF
chr12	14570642	14571084	chr6	136553997	136555997	100008482	13.1549	2.04138	0	0	0	0	0	0	0	0	0	0	0	0	1	0	0	0	0	1	1	CMEF
chr12	120729090	120729953	chr5	115489125	115491125	300010119	13.1405	4.24156	0	1	1	0	0	0	0	0	0	2	0	0	1	0	1	1	0	3	1	CMEF
chr1	200305612	200305875	chr1	136695661	136697661	100003194	13.1076	2.56521	1	0	1	1	1	1	0	0	1	6	0	0	0	0	1	0	0	1	1	CMEF
chr17	17686593	17687469	chr11	60176160	60178160	200016297	13.0348	2.40126	1	0	1	1	1	1	0	0	0	5	0	0	1	0	0	0	1	2	1	CMEF
chr1	27823446	27823615	chr4	133120173	133122173	100000622	12.9647	3.09477	0	0	0	0	0	0	0	0	0	0	0	0	0	0	0	0	1	1	1	CMEF
chr5	154136914	154137165	chr11	58009164	58011164	100034017	12.9403	4.71074	0	0	1	0	1	0	0	0	0	2	0	0	0	0	1	0	0	1	1	CMEF
chr6	144606272	144606630	chr10	12868158	12870158	200037042	12.9257	4.37993	0	0	1	0	1	0	0	0	0	2	0	0	0	1	0	0	1	2	1	CMEF
chr18	3624340	3624571	chr17	70737327	70739327	100017558	12.9045	3.15783	0	0	1	0	0	0	0	0	1	2	0	0	0	0	0	0	1	1	1	CMEF
chr8	105391886	105392286	chr15	39782124	39784124	100041586	12.8917	1.25888	0	0	0	0	0	0	0	0	0	0	0	0	1	0	0	0	0	1	1	CMEF
chr3	32911917	32912235	chr9	114526257	114528257	100026117	12.8745	4.85079	0	0	0	0	0	0	0	0	0	0	0	0	0	0	0	1	0	1	1	CMEF
chr6	15240087	15240495	chr13	44723437	44725437	200034780	12.8412	7.03209	0	0	0	0	0	0	0	0	0	0	0	0	1	0	1	0	0	2	1	CMEF
chr14	21923940	21924745	chr14	52256807	52258807	200011832	12.8126	3.58751	0	0	1	0	1	0	0	0	0	2	0	1	0	0	0	1	0	2	1	CMEF
chr7	47576047	47576288	chr11	8623071	8625071	100038316	12.7735	1.83995	0	0	1	0	1	0	0	0	0	2	0	0	0	1	0	0	0	1	1	CMEF
chr3	75483983	75484321	chr16	5254873	5256873	100026866	12.655	2.46534	0	0	1	0	1	0	0	0	1	3	0	0	0	1	0	0	0	1	1	CMEF
chr2	131185904	131186306	chr8	72318793	72320793	100021798	12.6545	1.56796	0	0	1	0	1	1	0	0	0	3	0	0	0	0	0	1	0	1	1	CMEF
chr2	70369584	70370136	chr6	86471376	86473376	300020931	12.6245	5.22792	1	0	1	1	1	0	0	0	0	4	0	0	0	1	1	1	0	3	1	CMEF
chr7	155301164	155302038	chr5	28208133	28210133	200039966	12.5905	0.912699	0	0	0	0	1	0	0	0	0	1	0	0	0	0	0	1	1	2	1	CMEF
chr9	36487865	36488121	chr4	44233241	44235241	100042699	12.5671	6.47014	0	0	1	0	1	0	0	0	0	2	0	0	0	1	0	0	0	1	1	CMEF
chr5	36745399	36745640	chr15	8567854	8569854	100032086	12.5472	2.0774	0	0	1	0	1	1	0	0	0	3	0	0	0	0	0	1	0	1	1	CMEF
chr7	12771068	12771280	chr12	39995226	39997226	100037684	12.3951	2.36712	1	1	0	0	0	0	0	0	0	2	0	0	0	0	0	0	1	1	1	CMEF
chr3	27524687	27524881	chr14	14702764	14704764	100026004	12.3595	2.6104	0	0	1	0	1	0	0	0	0	2	0	0	0	0	0	0	1	1	1	CMEF
chr1	149398676	149399423	chr3	96268867	96270867	200002331	12.2261	1.24592	0	0	0	0	0	0	0	0	0	0	1	0	0	1	0	0	0	2	1	CMEF
chr1	167683602	167684273	chr1	165641329	165643329	100002757	12.2023	2.06096	0	0	0	0	1	0	0	0	1	2	0	0	0	0	1	0	0	1	1	CMEF
chr4	38725911	38726191	chr5	64861035	64863035	100029358	12.1296	1.0083	0	0	0	0	0	0	0	0	0	0	0	0	0	1	0	0	0	1	1	CMEF
chr2	232276542	232276886	chr1	86312443	86314443	100023365	12.0768	4.7267	0	0	0	0	0	0	0	0	1	1	0	0	0	0	0	1	0	1	1	CMEF
chr6	39236456	39236778	chr14	20220054	20222054	100035456	12.0682	1.74596	0	1	0	0	0	0	0	0	1	2	0	0	0	0	0	0	1	1	1	CMEF
chr17	28926883	28927314	chr11	106920097	106922097	100016473	12.0677	3.5744	0	0	1	0	1	0	0	0	0	2	0	0	0	0	1	0	0	1	1	CMEF
chr18	21850880	21851179	chr18	12860540	12862540	200017824	12.0608	3.04652	0	0	1	1	1	0	0	0	0	3	0	0	0	0	1	0	1	2	1	CMEF
chr17	37618603	37618930	chr11	98202808	98204808	100016632	12.035	2.56243	0	0	0	0	0	0	0	0	0	0	0	0	0	0	0	0	1	1	1	CMEF
chr1	22352345	22352618	chr4	137386981	137388981	100000477	12.0209	4.76458	0	0	1	0	1	1	0	0	0	3	0	0	0	0	0	0	1	1	1	CMEF
chr1	32817170	32817475	chr4	129499711	129501711	100000708	12.0089	2.40086	0	0	1	1	1	1	0	0	0	4	0	0	0	0	0	1	0	1	1	CMEF
chr17	47270248	47270432	chr11	95857803	95859803	100016882	11.9728	3.23709	0	0	1	0	1	0	0	0	0	2	0	0	0	1	0	0	0	1	1	CMEF
chr7	27780305	27781141	chr6	52713606	52715606	200037967	11.8773	2.41571	0	0	0	0	1	0	0	0	0	1	0	0	0	1	0	0	1	2	1	CMEF
chr8	29144699	29144849	chr14	64631980	64633980	100040432	11.8656	1.46536	0	1	1	0	0	1	0	0	0	3	0	0	0	1	0	0	0	1	1	CMEF
chr12	54959589	54959847	chr15	103518103	103520103	100009083	11.8614	3.15554	1	0	1	1	0	0	0	0	0	3	0	0	0	0	0	0	1	1	1	CMEF
chr1	156426366	156426661	chr3	88177169	88179169	100002518	11.8476	3.5837	0	0	1	0	1	0	0	0	1	3	0	0	0	0	0	1	0	1	1	CMEF
chr6	26188106	26189535	chr13	23580696	23582696	300035002	11.8445	6.15146	0	0	0	0	0	0	0	0	0	0	0	0	1	0	1	1	0	3	1	CMEF
chr14	65878950	65879441	chr12	77237572	77239572	100012525	11.8445	4.14575	0	0	1	0	1	0	0	0	0	2	0	0	0	0	0	1	0	1	1	CMEF
chr16	30669299	30670231	chr7	127477189	127479189	200015209	11.8147	2.76285	0	0	1	0	0	0	0	0	0	1	0	0	0	0	1	0	1	2	1	CMEF
chr15	93427961	93428251	chr7	73555519	73557519	100014476	11.7839	3.59708	0	0	0	0	0	0	0	0	0	0	0	0	0	0	1	0	0	1	1	CMEF
chr1	120906142	120906514	chr3	96269034	96271034	100002138	11.7681	1.02182	0	0	0	0	0	0	0	0	0	0	0	0	0	1	0	0	0	1	1	CMEF
chr13	48808279	48808521	chr14	73383348	73385348	100010842	11.7536	2.93369	0	0	0	0	1	0	0	0	0	1	0	0	0	0	1	0	0	1	1	CMEF
chr14	102414189	102414900	chr12	110590590	110592590	100013115	11.7264	4.09235	0	0	1	1	1	0	0	0	0	3	0	0	0	1	0	0	0	1	1	CMEF
chr3	197354986	197355255	chr13	74349542	74351542	100028760	11.7185	1.92355	0	0	1	1	1	0	0	0	0	3	0	0	0	1	0	0	0	1	1	CMEF
chr7	23513832	23514467	chr6	49217171	49219171	200037868	11.7113	8.2561	0	0	1	0	1	1	0	0	0	3	0	0	0	0	1	1	0	2	1	CMEF
chr10	102802673	102803140	chr19	45057727	45059727	200005596	11.687	1.6179	0	0	0	0	0	0	0	0	0	0	0	0	0	1	0	1	0	2	1	CMEF
chr2	159920989	159921389	chr2	59697198	59699198	100022185	11.6866	1.46399	0	1	1	0	0	0	0	0	0	2	0	0	1	0	0	0	0	1	1	CMEF
chr12	6314420	6314821	chr6	125489040	125491040	200008314	11.6775	4.93893	0	0	0	0	0	0	0	0	0	0	1	0	0	0	0	0	1	2	1	CMEF
chr2	8818022	8818702	chr12	25098578	25100578	300019928	11.6726	2.36119	0	0	1	0	1	0	0	0	0	2	0	0	1	0	1	0	1	3	1	CMEF
chr2	232477172	232477475	chr1	86439608	86441608	100023374	11.6504	3.72894	0	0	0	0	0	0	0	0	1	1	0	0	0	0	0	1	0	1	1	CMEF
chr5	56112481	56112934	chr13	111806938	111808938	300032307	11.6455	2.51988	0	0	0	0	1	0	0	0	0	1	0	0	1	0	1	0	1	3	1	CMEF
chr17	41324338	41324514	chr11	101552869	101554869	100016725	11.6355	1.91884	0	0	0	0	0	0	0	0	0	0	0	0	0	0	0	0	1	1	1	CMEF
chr12	19179781	19180181	chr6	140336101	140338101	100008540	11.6099	3.25623	1	1	1	0	0	0	0	0	0	3	0	0	1	0	0	0	0	1	1	CMEF
chr3	156892632	156893068	chr3	65973847	65975847	300028082	11.5759	3.71482	0	1	1	0	1	0	0	0	0	3	0	0	0	1	1	1	0	3	1	CMEF
chr2	48338312	48339100	chr17	88255108	88257108	200020546	11.5513	3.51513	0	0	1	0	1	1	0	0	0	3	0	0	0	1	1	0	0	2	1	CMEF
chr17	38502608	38502876	chr11	98963630	98965630	100016660	11.5341	2.20791	1	1	0	1	0	1	0	0	1	5	0	0	0	0	0	0	1	1	1	CMEF
chr5	139487182	139487533	chr18	36280098	36282098	100033713	11.5314	2.19681	1	0	1	1	1	0	0	0	0	4	0	0	0	1	0	0	0	1	1	CMEF
chr13	41323805	41324000	chr8	22424597	22426597	100010718	11.5248	1.20695	0	0	0	0	0	0	0	0	0	0	0	0	0	0	1	0	0	1	1	CMEF
chr16	51189250	51189626	chr8	89045613	89047613	100015343	11.4991	2.14919	0	0	0	1	0	0	0	0	0	1	0	0	0	0	1	0	0	1	1	CMEF
chr12	109085266	109085724	chr5	113872100	113874100	200009919	11.498	2.59571	0	1	1	0	0	0	0	0	0	2	1	0	1	0	0	0	0	2	1	CMEF
chr1	151430643	151430931	chr3	94837456	94839456	100002408	11.4916	5.83523	0	0	1	0	1	0	0	0	0	2	0	0	0	0	1	0	0	1	1	CMEF
chr7	129420631	129420852	chr6	30173793	30175793	100039543	11.4461	2.49261	0	0	1	0	1	1	0	0	0	3	0	0	0	0	0	0	1	1	1	CMEF
chr3	185801688	185801939	chr16	22415355	22417355	100028534	11.4291	1.7312	0	0	0	0	0	0	0	0	0	0	0	0	0	0	1	0	0	1	1	CMEF
chr20	49407067	49407742	chr2	168114160	168116160	200024294	11.4283	2.90127	1	0	0	1	1	1	0	0	1	5	0	0	0	1	0	1	0	2	1	CMEF
chr6	135572948	135573162	chr10	21100322	21102322	100036860	11.4178	4.51648	1	0	1	1	0	0	0	0	1	4	0	0	0	0	0	0	1	1	1	CMEF
chr17	47269391	47270187	chr11	95858329	95860329	100016881	11.4123	2.80434	0	0	1	0	1	0	0	0	0	2	0	0	0	0	1	0	0	1	1	CMEF
chr1	16694790	16695105	chr4	141137492	141139492	100000334	11.4104	4.09405	0	0	0	0	0	0	0	0	0	0	0	0	0	0	0	0	1	1	1	CMEF
chr5	16713695	16714095	chr15	25772857	25774857	100031801	11.3855	2.51578	1	1	1	0	0	0	0	0	0	3	0	0	1	0	0	0	0	1	1	CMEF
chr5	60627340	60628111	chr13	107889404	107891404	400032364	11.3691	2.41167	0	0	1	0	1	0	0	0	0	2	0	0	0	1	1	1	1	4	1	CMEF
chr7	138915703	138915919	chr6	38432754	38434754	100039701	11.2973	4.87937	0	0	1	0	1	0	0	0	0	2	0	0	0	0	0	1	0	1	1	CMEF
chr7	30325427	30325663	chr6	54816486	54818486	100038026	11.2776	3.05915	0	0	1	0	1	0	0	0	0	2	0	0	0	0	0	1	0	1	1	CMEF
chr19	41109441	41110434	chr7	27330127	27332127	200019403	11.2713	2.17436	0	0	0	0	1	1	0	0	0	2	0	0	0	1	0	0	1	2	1	CMEF
chr6	105389163	105389571	chr10	45484806	45486806	100036328	11.2666	2.86762	0	0	1	0	1	0	0	0	0	2	0	0	0	0	0	1	0	1	1	CMEF
chr19	52207334	52207654	chr17	17837292	17839292	100019654	11.2578	2.17429	0	0	1	0	0	0	0	0	0	1	0	0	0	1	0	0	0	1	1	CMEF
chr1	959998	960328	chr4	156192336	156194336	200000015	11.237	3.84629	1	0	0	0	0	1	0	0	0	2	0	0	0	1	1	0	0	2	1	CMEF
chr20	52294503	52294903	chr2	170192041	170194041	100024343	11.2339	2.52342	1	1	1	0	0	0	0	0	0	3	0	0	1	0	0	0	0	1	1	CMEF
chr19	34972328	34972753	chr7	34132362	34134362	100019260	11.1933	3.40753	0	0	1	0	1	0	0	0	0	2	0	0	0	1	0	0	0	1	1	CMEF
chr15	41914147	41914327	chr2	119872329	119874329	100013542	11.1738	1.34318	0	0	1	0	1	0	0	0	0	2	0	0	0	0	0	1	0	1	1	CMEF
chr6	44170174	44170821	chr17	45610064	45612064	400035554	11.1665	3.85515	0	0	0	0	0	0	0	0	0	0	0	1	0	0	1	1	1	4	1	CMEF
chr20	307715	308323	chr2	152395251	152397251	100023553	11.1583	4.0068	0	0	1	0	0	1	0	0	0	2	0	0	0	0	0	0	1	1	1	CMEF
chr4	187597614	187598012	chr8	44979283	44981283	100031527	11.1393	2.25278	0	1	1	0	0	0	1	0	0	3	0	0	0	0	1	0	0	1	1	CMEF
chr11	64037237	64038715	chr19	6950530	6952530	300007052	11.1348	5.04709	0	0	0	0	1	0	0	0	0	1	1	0	0	1	0	1	0	3	1	CMEF
chr2	151334727	151335101	chr2	51139697	51141697	100022047	11.1206	2.19952	0	0	0	0	0	0	0	0	0	0	0	0	0	0	1	0	0	1	1	CMEF
chr10	89102068	89102271	chr18	31759029	31761029	100005367	11.1123	3.29134	0	0	1	0	1	0	0	0	0	2	0	0	0	0	0	1	0	1	1	CMEF
chr3	195716950	195717262	chr13	74349203	74351203	100028725	11.1062	2.70189	0	0	1	1	1	0	0	0	0	3	0	0	0	0	0	0	1	1	1	CMEF
chr3	195384806	195385142	chr13	74349213	74351213	100028721	11.1062	1.17026	0	0	1	1	1	0	0	0	0	3	0	0	0	0	0	0	1	1	1	CMEF
chr10	76994594	76994826	chr14	21846913	21848913	100005173	11.0819	3.00128	0	0	0	1	1	0	0	0	0	2	0	0	0	0	0	0	1	1	1	CMEF
chr9	97811491	97811649	chr13	63272516	63274516	100043290	10.9989	0.885312	0	1	1	1	1	1	0	0	1	6	0	0	0	0	0	0	1	1	1	CMEF
chr1	32409929	32410400	chr4	129810059	129812059	200000695	10.9902	3.25623	0	0	1	1	1	1	0	0	1	5	0	0	1	1	0	0	0	2	1	CMEF
chrX	68249733	68250133	chrX	99331272	99333272	100044641	10.983	1.89676	1	1	0	0	0	0	0	0	0	2	1	0	0	0	0	0	0	1	1	CMEF
chr9	127631245	127631632	chr2	39007124	39009124	100043769	10.9572	5.89789	0	0	1	0	1	0	0	0	0	2	0	0	0	0	0	1	0	1	1	CMEF
chr19	49137634	49138039	chr7	45706795	45708795	200019576	10.9445	3.10707	0	0	1	0	1	0	0	0	0	2	0	0	0	1	0	1	0	2	1	CMEF
chr10	60680005	60680363	chr10	70843733	70845733	100004895	10.8598	1.23397	0	0	0	0	0	0	0	0	0	0	0	0	0	0	0	0	1	1	1	CMEF
chr14	57265918	57266155	chr14	48655211	48657211	100012350	10.8522	1.96281	0	0	0	0	0	0	0	0	1	1	0	0	0	0	0	0	1	1	1	CMEF
chr20	36024909	36025293	chr2	157464035	157466035	100024093	10.8348	4.0273	0	0	0	0	1	1	0	0	1	3	0	0	0	0	0	1	0	1	1	CMEF
chr1	11805938	11806193	chr4	148082778	148084778	100000261	10.834	1.11188	0	0	1	1	0	0	1	1	0	4	0	0	0	0	0	1	0	1	1	CMEF
chr14	58706400	58706890	chr12	70967961	70969961	100012390	10.8334	1.44224	0	0	0	0	1	0	0	0	0	1	0	0	0	0	1	0	0	1	1	CMEF
chr9	136996281	136996437	chr2	27504730	27506730	100043977	10.8281	2.02906	0	0	1	0	0	0	0	0	0	1	0	0	0	0	0	1	0	1	1	CMEF
chr18	8686610	8687010	chr17	66468767	66470767	100017655	10.8204	1.14944	0	0	0	0	0	0	0	0	0	0	1	0	0	0	0	0	0	1	1	CMEF
chr8	102506086	102506390	chr15	37233549	37235549	200041519	10.8176	3.51513	0	0	1	0	1	0	0	0	0	2	0	0	0	1	1	0	0	2	1	CMEF
chr19	47729216	47729608	chr7	16313131	16315131	100019524	10.8163	5.12758	0	0	0	0	1	0	0	0	1	2	0	0	0	1	0	0	0	1	1	CMEF
chr6	44040971	44041293	chr17	45735907	45737907	100035552	10.797	2.81937	0	0	1	0	0	0	0	0	0	1	0	0	0	0	0	0	1	1	1	CMEF
chr7	29724381	29724523	chr6	54816405	54818405	100038010	10.7953	2.64236	0	0	1	0	1	0	0	0	0	2	0	0	0	0	0	1	0	1	1	CMEF
chr13	28318964	28319364	chr5	147154635	147156635	100010503	10.7921	1.8648	1	1	1	0	0	0	0	0	0	3	1	0	0	0	0	0	0	1	1	CMEF
chr1	156716557	156716975	chr3	87909885	87911885	100002531	10.7678	6.49251	0	0	1	0	0	0	0	0	0	1	0	0	0	1	0	0	0	1	1	CMEF
chr17	41516374	41516774	chr11	101695344	101697344	100016731	10.7434	1.33637	1	0	1	0	0	0	0	0	0	2	0	0	1	0	0	0	0	1	1	CMEF
chr12	49628928	49629194	chr15	98993045	98995045	100008975	10.7426	2.3927	0	0	1	0	0	0	0	0	0	1	0	0	0	0	0	1	0	1	1	CMEF
chr1	109642672	109643013	chr3	108553716	108555716	100001947	10.7388	4.15414	0	0	1	0	1	0	0	0	0	2	0	0	0	0	0	0	1	1	1	CMEF
chr8	102138735	102138969	chr15	36937765	36939765	100041512	10.7328	1.94636	0	0	1	0	1	0	0	0	0	2	0	0	0	0	0	1	0	1	1	CMEF
chr15	39958827	39959237	chr2	118178603	118180603	200013495	10.7312	2.46475	0	0	0	0	1	0	0	0	0	1	0	0	1	0	1	0	0	2	1	CMEF
chr22	36725276	36725884	chr15	77797857	77799857	400025346	10.7242	3.48879	0	0	0	0	0	0	0	0	1	1	1	0	1	0	1	1	0	4	1	CMEF
chr10	126842786	126843033	chr7	133116159	133118159	100006013	10.7229	4.66036	0	0	0	0	0	0	0	0	0	0	0	0	0	0	1	0	0	1	1	CMEF
chr7	72395339	72395795	chr5	135393464	135395464	100038607	10.7082	3.49898	0	0	1	0	1	0	0	0	0	2	0	0	0	0	0	1	0	1	1	CMEF
chr7	76009291	76009750	chr5	135956771	135958771	100038680	10.7037	2.40126	0	0	1	1	0	1	0	0	0	3	0	0	0	0	1	0	0	1	1	CMEF
chr1	22351711	22352059	chr4	137387494	137389494	200000476	10.7033	4.92891	0	0	1	0	1	1	0	0	0	3	0	0	0	0	1	0	1	2	1	CMEF
chr20	13630376	13630776	chr2	140076952	140078952	100023759	10.6963	2.17444	1	0	0	1	0	0	0	0	0	2	0	0	1	0	0	0	0	1	1	CMEF
chr1	28573510	28573833	chr4	132514735	132516735	100000639	10.6937	2.4836	0	0	0	0	0	0	0	0	0	0	0	0	0	1	0	0	0	1	1	CMEF
chr5	7306763	7306982	chr2	32287143	32289143	100031676	10.6833	1.88986	0	0	1	0	1	0	0	0	0	2	0	0	0	0	0	0	1	1	1	CMEF
chr15	72897239	72897431	chr2	32287123	32289123	100014103	10.6737	1.27091	0	0	1	0	1	0	0	0	0	2	0	0	0	0	0	0	1	1	1	CMEF
chr13	73634642	73634849	chr14	99299166	99301166	100011213	10.6736	1.71481	0	0	0	0	0	0	0	0	0	0	0	0	0	0	0	1	0	1	1	CMEF
chr7	75071864	75072123	chr5	135393467	135395467	100038657	10.6448	1.8908	0	0	1	0	1	0	0	0	0	2	0	0	0	0	0	1	0	1	1	CMEF
chr6	53412823	53413084	chr9	77749816	77751816	100035679	10.6296	2.49199	0	0	1	0	1	1	0	0	0	3	0	0	0	0	1	0	0	1	1	CMEF
chr15	29093821	29094007	chr2	32287127	32289127	100013309	10.6238	1.10476	0	0	1	0	1	0	0	0	0	2	0	0	0	0	0	0	1	1	1	CMEF
chr6	37139771	37140310	chr17	29491862	29493862	300035416	10.6175	2.58435	0	0	0	0	0	0	0	0	0	0	0	0	1	0	1	0	1	3	1	CMEF
chr15	30843934	30844206	chr2	32287180	32289180	100013340	10.5985	1	0	0	1	0	1	0	0	0	0	2	0	0	0	0	0	0	1	1	1	CMEF
chrY	26314020	26314214	chr2	32287112	32289112	100045487	10.5915	1	0	0	1	0	1	0	0	0	0	2	0	0	0	0	0	0	1	1	1	CMEF
chrX	95965033	95965438	chrX	129775045	129777045	200044840	10.5904	1.65738	0	0	0	0	0	0	0	0	0	0	1	0	1	0	0	0	0	2	1	CMEF
chr15	76067629	76067906	chr2	32287157	32289157	100014180	10.5777	1.12429	0	0	1	0	1	0	0	0	0	2	0	0	0	0	0	0	1	1	1	CMEF
chr15	23255000	23255268	chr2	32287159	32289159	100013224	10.5777	0.949001	0	0	1	0	1	0	0	0	0	2	0	0	0	0	0	0	1	1	1	CMEF
chr15	85060079	85060331	chr2	32287161	32289161	100014321	10.5777	0.795571	0	0	1	0	1	0	0	0	0	2	0	0	0	0	0	0	1	1	1	CMEF
chr18	3392575	3392810	chr17	70891942	70893942	100017545	10.5771	1.27206	1	0	0	0	0	0	0	0	0	1	0	0	0	0	0	0	1	1	1	CMEF
chr15	83188313	83188613	chr2	32287162	32289162	100014294	10.572	1	0	0	1	0	1	0	0	0	0	2	0	0	0	0	0	0	1	1	1	CMEF
chr12	8113268	8113670	chr6	122760220	122762220	300008363	10.556	2.97842	0	0	0	0	0	0	0	0	0	0	1	0	0	0	1	0	1	3	1	CMEF
chr14	65878488	65878799	chr12	77237120	77239120	100012524	10.5484	3.15554	0	0	1	0	1	0	0	0	0	2	0	0	0	0	0	1	0	1	1	CMEF
chr2	112045766	112046098	chr2	128264579	128266579	200021522	10.5475	1.18705	0	1	0	1	0	0	0	0	0	2	0	0	0	0	1	0	1	2	1	CMEF
chr15	79019241	79019559	chr2	32287197	32289197	100014233	10.5144	0.978973	0	0	1	0	1	0	0	0	0	2	0	0	0	0	0	0	1	1	1	CMEF
chrX	110207977	110208377	chrX	143542341	143544341	100044957	10.5113	2.13485	1	1	1	0	0	0	0	0	0	3	1	0	0	0	0	0	0	1	1	CMEF
chr7	148684117	148684616	chr6	47787409	47789409	100039857	10.4975	1.9863	0	1	1	0	0	0	0	0	0	2	0	0	0	0	1	0	0	1	1	CMEF
chr15	102322293	102322545	chr2	32287167	32289167	100014608	10.4853	0.931618	0	0	1	0	1	0	0	0	0	2	0	0	0	0	0	0	1	1	1	CMEF
chr19	5693321	5693587	chr17	56613773	56615773	100018781	10.4802	1.50985	0	0	0	0	0	0	0	0	0	0	0	0	0	0	0	1	0	1	1	CMEF
chr14	77500032	77500665	chr12	86888252	86890252	100012753	10.4682	4.75305	0	0	0	1	0	0	0	0	1	2	0	0	0	0	0	1	0	1	1	CMEF
chrX	49047280	49047553	chrX	7648226	7650226	100044526	10.4651	2.5696	0	0	0	0	1	0	0	0	0	1	0	0	0	0	0	0	1	1	1	CMEF
chr19	39156672	39157105	chr7	28944815	28946815	200019354	10.4083	5.94635	0	0	0	0	0	0	0	0	0	0	0	0	1	0	1	0	0	2	1	CMEF
chr4	37644064	37644387	chr5	63931839	63933839	200029335	10.3889	2.1824	1	1	1	0	0	0	0	0	0	3	0	0	0	0	1	0	1	2	1	CMEF
chr15	82641559	82641966	chr2	32287199	32289199	100014283	10.3743	1	0	0	1	0	1	0	0	0	0	2	0	0	0	0	0	0	1	1	1	CMEF
chr2	161262989	161263738	chr2	60879625	60881625	400022209	10.37	2.20823	0	0	0	0	1	0	0	0	0	1	0	0	1	1	1	0	1	4	1	CMEF
chr12	8179670	8179922	chr6	122810475	122812475	100008368	10.3652	3.16865	0	0	1	1	1	0	0	0	1	4	0	0	0	0	0	1	0	1	1	CMEF
chr4	140003933	140004314	chr3	51275126	51277126	200030796	10.355	3.43734	0	0	1	0	1	0	0	0	0	2	0	0	0	0	1	0	1	2	1	CMEF
chr22	40575150	40575395	chr15	80798929	80800929	100025436	10.3314	5.54904	0	0	0	0	0	0	0	0	0	0	0	0	0	0	1	0	0	1	1	CMEF
chr11	57549054	57549338	chr2	84632148	84634148	100006929	10.3104	4.55734	0	0	0	0	0	0	0	0	0	0	0	0	0	0	1	0	0	1	1	CMEF
chr1	59912559	59912684	chr4	95684062	95686062	100001169	10.303	1.46561	1	1	0	0	0	0	0	0	1	3	0	0	0	0	0	0	1	1	1	CMEF
chr7	75932786	75933186	chr5	135887947	135889947	100038678	10.2903	2.88297	0	0	1	0	0	0	0	0	0	1	0	0	1	0	0	0	0	1	1	CMEF
chr5	174906422	174906822	chr13	54071681	54073681	100034349	10.265	2.14822	0	0	0	0	1	0	0	0	0	1	1	0	0	0	0	0	0	1	1	CMEF
chr2	230816938	230817173	chr1	84870957	84872957	200023345	10.2142	5.08531	1	1	1	1	0	0	0	0	0	4	0	0	0	0	0	0	1	1	1	CMEF
chr19	13957296	13957615	chr8	84197604	84199604	100018971	10.2131	4.67426	0	0	1	1	1	0	0	0	0	3	0	0	0	0	0	0	1	1	1	CMEF
chr19	51228222	51228448	chr7	44303922	44305922	100019639	10.2042	0.854413	0	0	1	0	1	0	0	0	0	2	0	0	0	1	0	0	0	1	1	CMEF
chr10	126605270	126605610	chr7	132930183	132932183	100006011	10.1224	6.20568	0	0	1	0	1	0	0	0	0	2	0	0	0	0	0	1	0	1	1	CMEF
chr2	65584510	65584910	chr11	19985816	19987816	100020850	10.1156	0.818288	1	0	1	1	0	0	0	0	0	3	1	0	0	0	0	0	0	1	1	CMEF
chr6	42011875	42012180	chr17	47510438	47512438	100035509	10.078	0.833514	1	0	1	1	0	1	0	0	1	5	0	0	0	0	0	1	0	1	1	CMEF
chr15	64752439	64752884	chr9	65826814	65828814	200013908	10.0673	3.65777	0	0	1	0	1	0	0	0	0	2	1	0	0	0	0	1	0	2	1	CMEF
chr10	112289942	112290337	chr19	53556573	53558573	100005755	10.0673	3.06508	0	0	1	0	0	0	0	0	0	1	0	0	0	0	1	0	0	1	1	CMEF
chr5	16736253	16736519	chr15	25757979	25759979	100031803	10.067	5.85971	0	0	0	0	0	0	0	0	0	0	0	0	0	0	1	0	0	1	1	CMEF
chr13	23489818	23490057	chr10	52416896	52418896	100010419	10.0634	2.88145	0	0	1	0	1	0	0	0	0	2	0	0	0	0	0	0	1	1	1	CMEF
chr1	52816661	52817102	chr4	108634283	108636283	200001040	10.0375	2.27028	0	1	0	0	0	0	0	0	0	1	0	0	1	0	0	0	1	2	1	CMEF
chr1	244013863	244014320	chr1	177257878	177259878	100003984	10.0113	5.00142	0	0	1	0	1	0	0	0	0	2	0	0	0	1	0	0	0	1	1	CMEF
chr1	167684479	167685061	chr1	165640645	165642645	100002758	10.0042	1.44766	0	0	0	0	0	0	0	0	0	0	0	0	0	0	1	0	0	1	1	CMEF
chr7	25990073	25991001	chr6	51269753	51271753	200037921	10.0029	4.39257	0	0	1	0	1	0	0	0	1	3	0	0	0	0	0	1	1	2	1	CMEF
chr21	40684342	40684611	chr16	96080562	96082562	100024896	10.0025	3.27154	0	0	0	0	0	0	0	0	0	0	0	0	0	1	0	0	0	1	1	CMEF
chr18	3554971	3555388	chr17	70770730	70772730	200017553	9.99223	3.52384	0	0	0	0	0	0	0	0	0	0	0	0	0	0	1	0	1	2	1	CMEF
chr9	74369138	74369327	chr19	21788119	21790119	100042921	9.98182	2.4875	0	1	1	0	0	0	0	0	0	2	0	0	0	0	0	0	1	1	1	CMEF
chr9	91058323	91058740	chr13	51123625	51125625	300043182	9.97702	1.93201	0	0	0	0	0	0	0	0	0	0	1	0	1	0	0	0	1	3	1	CMEF
chr17	42620432	42621162	chr11	102581599	102583599	300016766	9.95534	3.56531	0	0	0	1	0	0	0	0	1	2	0	0	1	0	1	0	1	3	1	CMEF
chr3	107149734	107150066	chr16	50528395	50530395	100027240	9.95431	2.40086	0	0	1	0	1	1	0	0	0	3	0	0	0	0	0	1	0	1	1	CMEF
chr17	27359054	27359493	chr11	77902560	77904560	100016446	9.92775	4.51732	0	0	0	0	0	0	0	0	1	1	0	0	1	0	0	0	0	1	1	CMEF
chr18	71851637	71852037	chr18	84930393	84932393	100018531	9.92396	3.35464	0	0	0	0	0	0	0	0	0	0	0	0	1	0	0	0	0	1	1	CMEF
chr17	47049824	47050058	chr11	96017242	96019242	100016872	9.90128	2.48125	0	1	1	0	0	0	0	1	0	3	0	0	0	0	0	0	1	1	1	CMEF
chr7	29724721	29724978	chr6	54816017	54818017	100038011	9.89979	3.09428	0	0	1	0	1	1	0	0	0	3	0	0	0	0	0	1	0	1	1	CMEF
chr10	126843114	126843398	chr7	133116458	133118458	100006014	9.83717	4.24117	0	0	0	0	0	0	0	0	0	0	0	0	0	0	1	0	0	1	1	CMEF
chr18	60189990	60190320	chr1	105989309	105991309	100018405	9.81119	3.96787	0	0	1	0	1	0	0	0	0	2	0	0	0	1	0	0	0	1	1	CMEF
chr2	65496059	65496459	chr11	20063291	20065291	200020847	9.80321	0.812515	0	0	0	0	0	0	0	0	0	0	0	0	1	0	1	0	0	2	1	CMEF
chr3	36361054	36361522	chr9	111724263	111726263	100026170	9.7698	1.72583	0	1	1	0	0	0	0	0	1	3	0	0	0	0	1	0	0	1	1	CMEF
chr17	47113219	47113543	chr12	101028505	101030505	100016878	9.7316	2.24716	0	0	1	0	1	0	0	0	0	2	0	0	0	0	0	1	0	1	1	CMEF
chr4	1573820	1574232	chr5	33536699	33538699	300028796	9.72777	2.3927	0	0	0	0	0	0	0	0	0	0	0	0	1	0	1	0	1	3	1	CMEF
chrX	39828208	39828634	chrX	11954877	11956877	100044431	9.70668	1.64874	0	0	0	0	0	0	0	0	0	0	0	0	1	0	0	0	0	1	1	CMEF
chr4	77751968	77752368	chr5	93004614	93006614	100029853	9.70571	1.46536	0	0	0	0	0	0	0	0	0	0	0	0	1	0	0	0	0	1	1	CMEF
chr7	4681596	4681835	chr5	142366640	142368640	100037553	9.70255	1.1566	1	0	1	0	1	0	0	0	0	3	0	0	0	0	0	1	0	1	1	CMEF
chr17	7746902	7747176	chr11	69408914	69410914	100016132	9.69858	3.01778	0	0	0	0	1	0	0	0	0	1	0	0	0	0	0	0	1	1	1	CMEF
chr5	140875486	140875886	chr18	37825280	37827280	100033749	9.69626	2.92481	0	0	0	0	1	0	0	0	1	2	0	0	1	0	0	0	0	1	1	CMEF
chr17	55483934	55484207	chr11	88584367	88586367	100017013	9.64713	2.21471	0	0	0	0	0	0	0	0	0	0	0	0	0	0	0	0	1	1	1	CMEF
chr9	84302544	84302982	chr4	72198773	72200773	200043077	9.64284	5.95616	0	0	0	0	1	0	0	0	0	1	1	0	0	0	1	0	0	2	1	CMEF
chr10	70322718	70323132	chr10	62883368	62885368	100005036	9.63514	5.55204	1	0	1	0	0	0	0	0	0	2	0	0	1	0	0	0	0	1	1	CMEF
chr6	144537143	144537937	chr10	12921884	12923884	200037038	9.62048	2.84547	0	0	1	0	1	0	0	0	0	2	0	0	0	1	1	0	0	2	1	CMEF
chr8	59570029	59570429	chr4	6451898	6453898	100040815	9.56328	1.48302	0	0	0	0	0	0	0	0	0	0	1	0	0	0	0	0	0	1	1	CMEF
chr16	31153483	31153843	chr7	127934161	127936161	100015234	9.56106	2.42236	0	0	1	0	1	0	0	0	1	3	0	0	0	1	0	0	0	1	1	CMEF
chr1	147071332	147072080	chr3	97226591	97228591	200002262	9.55312	4.63175	0	0	1	0	1	0	0	0	0	2	0	0	0	1	1	0	0	2	1	CMEF
chr15	85114146	85114476	chr9	55148292	55150292	200014322	9.54563	2.45231	0	0	1	0	1	0	0	0	0	2	0	0	0	0	0	1	1	2	1	CMEF
chr12	69635452	69635852	chr10	117374039	117376039	100009304	9.54142	1.5588	0	0	0	0	0	0	0	0	0	0	0	0	1	0	0	0	0	1	1	CMEF
chr2	157198029	157198446	chr2	57122586	57124586	100022143	9.53377	3.21785	0	0	1	0	1	0	0	0	0	2	0	0	0	0	1	0	0	1	1	CMEF
chr12	7999821	8000196	chr6	122768761	122770761	100008356	9.53019	3.94989	0	0	1	0	0	0	0	0	0	1	0	0	0	0	1	0	0	1	1	CMEF
chr1	24634802	24635469	chr4	135580658	135582658	300000526	9.51913	3.62013	0	1	0	1	1	0	0	0	1	4	1	0	1	0	0	1	0	3	1	CMEF
chr7	44058596	44059086	chr5	136115664	136117664	200038270	9.50899	2.21119	0	0	1	0	1	0	0	0	0	2	0	0	0	0	1	1	0	2	1	CMEF
chr5	53511308	53511789	chr13	113878907	113880907	200032268	9.50791	3.05286	0	0	0	0	0	0	0	0	0	0	0	0	1	0	1	0	0	2	1	CMEF
chr10	82224524	82224924	chr14	40955326	40957326	100005266	9.49507	3.84712	0	1	0	0	0	1	0	0	0	2	0	0	1	0	0	0	0	1	1	CMEF
chr22	29279175	29279354	chr11	5444076	5446076	100025228	9.47886	3.41345	0	0	1	0	1	0	0	0	0	2	0	0	0	0	0	0	1	1	1	CMEF
chr2	136631683	136632073	chr1	128357337	128359337	100021853	9.4564	2.69018	0	0	0	0	0	0	0	0	0	0	0	0	0	0	1	0	0	1	1	CMEF
chr7	64498571	64498840	chr5	129941114	129943114	100038475	9.45376	2.76711	0	0	1	0	1	1	0	0	0	3	0	0	0	0	0	1	0	1	1	CMEF
chr13	73664562	73664864	chr14	99323682	99325682	100011216	9.44047	2.13535	1	1	1	1	0	0	0	0	0	4	0	0	0	0	0	0	1	1	1	CMEF
chr2	232276958	232277315	chr1	86312852	86314852	100023366	9.43382	4.32893	0	0	0	0	0	0	0	0	1	1	0	0	0	0	0	1	0	1	1	CMEF
chr9	3524657	3524843	chr19	28008984	28010984	100042235	9.3956	3.25638	0	0	0	0	0	0	0	0	0	0	0	0	0	0	0	0	1	1	1	CMEF
chr14	102562952	102563347	chr12	110702107	110704107	100013117	9.3929	1.55127	1	0	1	1	0	0	0	0	0	3	0	0	0	0	0	0	1	1	1	CMEF
chr9	108673225	108673625	chr4	53950861	53952861	100043451	9.38722	4.12904	0	1	0	1	0	0	0	0	0	2	1	0	0	0	0	0	0	1	1	CMEF
chr2	161826602	161827014	chr2	61401326	61403326	300022218	9.37529	2.43301	0	0	0	0	0	0	0	0	1	1	0	0	1	0	1	0	1	3	1	CMEF
chr9	137029484	137029884	chr2	27538961	27540961	200043978	9.37428	3.40168	0	0	1	0	0	0	0	0	0	1	1	0	0	0	1	0	0	2	1	CMEF
chr1	202054429	202054685	chr1	135198321	135200321	100003231	9.35618	4.46926	0	1	1	1	1	1	0	0	1	6	0	0	0	0	1	0	0	1	1	CMEF
chr13	45491657	45492463	chr14	76151718	76153718	100010789	9.35538	3.25666	0	0	0	0	0	0	0	0	1	1	0	0	0	0	1	0	0	1	1	CMEF
chr5	139017161	139017803	chr18	35814208	35816208	100033702	9.33333	3.11893	1	0	1	1	1	0	0	0	1	5	0	0	0	0	0	1	0	1	1	CMEF
chr17	16649920	16650216	chr8	13785774	13787774	100016278	9.32449	1.34298	0	0	0	0	1	0	0	0	0	1	0	0	0	1	0	0	0	1	1	CMEF
chr14	77413957	77414255	chr12	86823414	86825414	100012746	9.31705	4.39217	1	1	1	0	1	1	0	0	0	5	0	0	0	0	1	0	0	1	1	CMEF
chr6	151710616	151711016	chr10	4385265	4387265	200037146	9.28251	4.61964	0	0	0	0	1	1	0	0	0	2	0	1	0	0	0	0	1	2	1	CMEF
chr22	29279370	29279740	chr11	5443846	5445846	100025229	9.26839	3.75622	0	0	1	0	1	0	0	0	0	2	0	0	0	0	0	0	1	1	1	CMEF
chr16	22309654	22310211	chr7	120917820	120919820	100015064	9.26512	2.51695	0	0	1	0	0	0	0	0	0	1	0	0	0	0	1	0	0	1	1	CMEF
chr15	32635006	32635287	chr9	55148401	55150401	100013365	9.25442	1.05654	0	0	1	0	1	0	0	0	1	3	0	0	0	0	0	0	1	1	1	CMEF
chr7	32767803	32768036	chr6	54815903	54817903	100038070	9.24826	1.95624	0	0	1	0	1	1	0	0	0	3	0	0	0	0	0	1	0	1	1	CMEF
chr10	112289271	112289671	chr19	53555977	53557977	100005754	9.24169	2.22346	0	0	1	0	0	0	0	0	0	1	0	0	1	0	0	0	0	1	1	CMEF
chr1	27815006	27815252	chr4	133130740	133132740	100000620	9.23934	1.60367	0	0	0	0	0	0	0	0	0	0	0	0	0	0	0	0	1	1	1	CMEF
chr15	34807097	34807324	chr9	55148396	55150396	100013411	9.23567	0.922363	0	0	1	0	1	0	0	0	1	3	0	0	0	0	0	0	1	1	1	CMEF
chr15	30487835	30488073	chr9	55148392	55150392	100013333	9.22942	1.24028	0	0	1	0	1	0	0	0	1	3	0	0	0	0	0	0	1	1	1	CMEF
chr15	56538129	56538383	chr9	72529571	72531571	100013747	9.21886	2.5845	0	0	0	0	0	0	0	0	0	0	0	0	0	0	1	0	0	1	1	CMEF
[truncated: 21,710 more rows]
